# Supplementary material
Source: ML conference proceedings conference paper supplement (https://openreview.net/forum?id=HMVQ00vabY)
Supplement: supplementary_material [file 1.xlsx]

## Sheet: Ordering 1
Subreddit	Post	Disclosure (Ordering)	Disclosure Category	Query	ID	Conditionally Independent?	Source Used	Succeeded?	Reliable?	Annotator Confidence	Value	Ground Truth	Ground Truth Reliability	Ground Truth Source	Disclosure Type	ChatGPT Response	Operation	Parentheses
gatech	Georgia Tech International Film Festival Hey fellow Jackets, I'm super stoked to announce our annual Georgia Tech International Film Festival (GTIFF) next month! 🎥 We've been planning this event for mosnths, and I'm so excited to see the diverse lineup of films and meet fellow film enthusiasts. As a Modern Languages major, I'm particularly interested in exploring the intersection of language and …	Georgia Tech	education	number of students at Georgia Tech	1	[]	ChatGPT	Yes	Yes	High	32000	36169	Yes	https://irp.gatech.edu/disclosures/student-demographics	Feasible	Thought Process: Understanding the Query: The query asks for the total number of students at Georgia Tech, including undergraduate, graduate, and professional students. Historic Data: Georgia Tech is a large public university with a growing enrollment. Recent data shows a steady increase in both undergraduate and graduate student populations. Estimation: Georgia Tech typically has around 17,000 u…	Multiplication	Out
gatech	Georgia Tech International Film Festival Hey fellow Jackets, I'm super stoked to announce our annual Georgia Tech International Film Festival (GTIFF) next month! 🎥 We've been planning this event for mosnths, and I'm so excited to see the diverse lineup of films and meet fellow film enthusiasts. As a Modern Languages major, I'm particularly interested in exploring the intersection of language and …	school of Modern Languages	education	percentage of students at Georgia Tech in the Ivan Allen college of Liberal Arts	2	[]	ChatGPT	Yes	Yes	High	0.06	0.0222	Yes	https://en.wikipedia.org/wiki/Ivan_Allen_College_of_Liberal_Arts	Feasible	Thought Process: Understanding the Query: The query asks for the percentage of students at Georgia Tech enrolled in the Ivan Allen College of Liberal Arts (IAC), which houses programs like International Affairs, Public Policy, Modern Languages, and more. Historic Data: Georgia Tech is predominantly a STEM-focused institution, with most students enrolled in engineering, computing, and science disc…	Multiplication	Begin
gatech	Georgia Tech International Film Festival Hey fellow Jackets, I'm super stoked to announce our annual Georgia Tech International Film Festival (GTIFF) next month! 🎥 We've been planning this event for mosnths, and I'm so excited to see the diverse lineup of films and meet fellow film enthusiasts. As a Modern Languages major, I'm particularly interested in exploring the intersection of language and …	school of Modern Languages	education	number of departments in the Ivan Allen College of Liberal Arts	3	[]	ChatGPT	Yes	Yes	High	6	6	Yes	https://en.wikipedia.org/wiki/Ivan_Allen_College_of_Liberal_Arts	Feasible	Thought Process: Understanding the Query: The query asks for the total number of departments in Georgia Tech's Ivan Allen College of Liberal Arts (IAC). Each department focuses on a specific discipline or area of study within the liberal arts. Historic Data: The Ivan Allen College is smaller than Georgia Tech’s STEM colleges but houses a diverse range of disciplines within the liberal arts. The c…	Division, 1	In
gatech	Georgia Tech International Film Festival Hey fellow Jackets, I'm super stoked to announce our annual Georgia Tech International Film Festival (GTIFF) next month! 🎥 We've been planning this event for mosnths, and I'm so excited to see the diverse lineup of films and meet fellow film enthusiasts. As a Modern Languages major, I'm particularly interested in exploring the intersection of language and …	international film festival	events	percentage of college students that attend an international film festival in one year	4	[1, 2, 3]	ChatGPT	Yes	Yes	High	0.02	0.0069	Yes	https://modlangs.gatech.edu/sixth-annual-global-media-festival	Feasible	Thought Process: Understanding the Query: The query seeks the percentage of college students who attend an international film festival. This is a niche activity and depends on factors like interest in film, availability of festivals, and student engagement. Historic Data: International film festivals, while popular, are not mainstream events for most college students. Film students or those with …	Multiplication	Out

## Sheet: Ordering 2
Subreddit	Post	Disclosure (Ordering)	Disclosure Category	Query	ID	Conditionally Independent?	Source Used	Succeeded?	Reliable?	Annotator Confidence	Value	Ground Truth	Ground Truth Reliability	Ground Truth Source	Disclosure Type	ChatGPT Response	Operation	Parentheses
gatech	Georgia Tech International Film Festival Hey fellow Jackets, I'm super stoked to announce our annual Georgia Tech International Film Festival (GTIFF) next month! 🎥 We've been planning this event for mosnths, and I'm so excited to see the diverse lineup of films and meet fellow film enthusiasts. As a Modern Languages major, I'm particularly interested in exploring the intersection of language and …	Georgia Tech International Film Festival	education	number of people that attend the Georgia Tech International Film Festival	1	[]	ChatGPT	Yes	No	Medium	600	250	Yes	https://modlangs.gatech.edu/sixth-annual-global-media-festival	Feasible	Thought Process: Understanding the Query: The query asks for the estimated number of attendees at the Georgia Tech International Film Festival. This is a niche event likely attended by students, faculty, and members of the local community. Relevant Data: University-based film festivals are typically smaller events compared to major citywide festivals. Attendance would depend on the size of the ve…	Multiplication	Out
gatech	Georgia Tech International Film Festival Hey fellow Jackets, I'm super stoked to announce our annual Georgia Tech International Film Festival (GTIFF) next month! 🎥 We've been planning this event for mosnths, and I'm so excited to see the diverse lineup of films and meet fellow film enthusiasts. As a Modern Languages major, I'm particularly interested in exploring the intersection of language and …	school of Modern Languages	education	percentage of people at the Georgia Tech International Film Festival that are in the department of Modern Languages	2	[]	ChatGPT	Yes	No	Medium	0.25	0.1667	No	https://modlangs.gatech.edu/sixth-annual-global-media-festival	Feasible	Thought Process: Understanding the Query: The query seeks the percentage of attendees at the Georgia Tech International Film Festival who are affiliated with the Modern Languages department. This would include students, faculty, and staff from that department. Contextual Data: The Modern Languages department likely plays a significant role in organizing or promoting the festival, meaning its memb…	Multiplication	Out
