# Supplementary material
Source: ML conference proceedings conference paper supplement (https://openreview.net/forum?id=HMVQ00vabY)
Supplement: supplementary_material [file 1.xlsx]

## Sheet: Ordering 1
Subreddit	Post	Disclosure (Ordering)	Disclosure Category	Query	ID	Conditionally Independent?	Source Used	Succeeded?	Reliable?	Annotator Confidence	Value	Ground Truth	Ground Truth Reliability	Ground Truth Source	Disclosure Type	ChatGPT Response	Operation	Parentheses
gatech	TITLE: Harassment on campus I'm a junior at tech and I just feel so annoyed with all the catcalling/harassment I've been getting recently. I wear pretty modest clothing as a girl and I'm not doing anything to draw attention to myself, but it feels like alot of the time I walk across campus some guy is hitting on me or yelling at me. i'm just not comfortable walking around campus alone at certain …	I'm a junior at tech	education	Number of undergraduate students at Georgia Tech	1	[]	ChatGPT	Yes	No	Low	16500	20592	Yes	https://lite.gatech.edu/lite_script/dashboards/enrollment.html	Feasible	Georgia Tech has a significant undergraduate population, and as of recent data, the number typically ranges around 16,000 to 17,000 undergraduates. **Calculation/Estimation**: The historical average falls between 16,000-17,000 based on enrollment trends in previous years. Confidence Score: 0.9 <answer>16500</answer>	Multiplication	Out
gatech	TITLE: Harassment on campus I'm a junior at tech and I just feel so annoyed with all the catcalling/harassment I've been getting recently. I wear pretty modest clothing as a girl and I'm not doing anything to draw attention to myself, but it feels like alot of the time I walk across campus some guy is hitting on me or yelling at me. i'm just not comfortable walking around campus alone at certain …	I'm a junior at tech	education	Percentage of undergraduate students at Georgia Tech that are in their junior year	2	[]	ChatGPT	Yes	Yes	High	0.25	0.2376	Yes	https://lite.gatech.edu/lite_script/dashboards/enrollment.html	Feasible	At Georgia Tech, undergraduate students are typically distributed fairly evenly across the four years of study. Assuming a consistent distribution, around 25% of undergraduate students would be in their junior year. Confidence Score: 0.8 <answer>25</answer>	Multiplication	Out
gatech	TITLE: Harassment on campus I'm a junior at tech and I just feel so annoyed with all the catcalling/harassment I've been getting recently. I wear pretty modest clothing as a girl and I'm not doing anything to draw attention to myself, but it feels like alot of the time I walk across campus some guy is hitting on me or yelling at me. i'm just not comfortable walking around campus alone at certain …	as a girl	gender	Percentage of undergraduate students at Georgia Tech that are female	3	[2]	ChatGPT	Yes	Yes	High	0.4	0.3972	Yes	https://lite.gatech.edu/lite_script/dashboards/enrollment.html	Feasible	Georgia Tech's undergraduate female enrollment has historically been around 40%, though this percentage has varied slightly over the years. Confidence Score: 0.85 <answer>40</answer>	Multiplication	Out
gatech	TITLE: Harassment on campus I'm a junior at tech and I just feel so annoyed with all the catcalling/harassment I've been getting recently. I wear pretty modest clothing as a girl and I'm not doing anything to draw attention to myself, but it feels like alot of the time I walk across campus some guy is hitting on me or yelling at me. i'm just not comfortable walking around campus alone at certain …	I just feel so annoyed with all the catcalling/harassment I've been getting	personal_experience	Percentage of women in the US that have experienced catcalling in the last year	4	[1, 2]	ChatGPT	Yes	No	Low	0.65	0.38	Yes	https://www.ons.gov.uk/peoplepopulationandcommunity/crimeandjustice/bulletins/perceptionsofpersonalsafetyandexperiencesofharassmentgreatbritain/16februaryto13march2022#:~:text=More%20than%20one%20third%20of,adults%20than%20non%2Ddisabled%20adults.	Feasible	Studies on street harassment in the US have shown that a substantial percentage of women report experiencing catcalling or similar harassment annually. The estimated percentage generally falls between 60% and 70%. Confidence Score: 0.8 <answer>65</answer>	Multiplication	Out

## Sheet: Ordering 2
Subreddit	Post	Disclosure (Ordering)	Disclosure Category	Query	ID	Conditionally Independent?	Source Used	Succeeded?	Reliable?	Annotator Confidence	Value	Ground Truth	Ground Truth Reliability	Ground Truth Source	Disclosure Type	ChatGPT Response	Operation	Parentheses
gatech	TITLE: Harassment on campus I'm a junior at tech and I just feel so annoyed with all the catcalling/harassment I've been getting recently. I wear pretty modest clothing as a girl and I'm not doing anything to draw attention to myself, but it feels like alot of the time I walk across campus some guy is hitting on me or yelling at me. i'm just not comfortable walking around campus alone at certain …	I'm a junior at tech	education	Number of undergraduate students at Georgia Tech	1	[]	ChatGPT	Yes	No	Low	16500	20592	Yes	https://lite.gatech.edu/lite_script/dashboards/enrollment.html	Feasible	Georgia Tech has a significant undergraduate population, and as of recent data, the number typically ranges around 16,000 to 17,000 undergraduates. **Calculation/Estimation**: The historical average falls between 16,000-17,000 based on enrollment trends in previous years. Confidence Score: 0.9 <answer>16500</answer>	Multiplication	Out
gatech	TITLE: Harassment on campus I'm a junior at tech and I just feel so annoyed with all the catcalling/harassment I've been getting recently. I wear pretty modest clothing as a girl and I'm not doing anything to draw attention to myself, but it feels like alot of the time I walk across campus some guy is hitting on me or yelling at me. i'm just not comfortable walking around campus alone at certain …	I'm a junior at tech	education	Number of undergraduate class levels	2	[]	ChatGPT	Yes	Yes	High	4	4	Yes	https://lite.gatech.edu/lite_script/dashboards/enrollment.html	Feasible	In a typical undergraduate structure in the U.S., there are four class levels: freshman, sophomore, junior, and senior. Confidence Score: 1.0 <answer>4</answer>	(Division, 1)	In
gatech	TITLE: Harassment on campus I'm a junior at tech and I just feel so annoyed with all the catcalling/harassment I've been getting recently. I wear pretty modest clothing as a girl and I'm not doing anything to draw attention to myself, but it feels like alot of the time I walk across campus some guy is hitting on me or yelling at me. i'm just not comfortable walking around campus alone at certain …	as a girl	gender	Percentage of undergraduate students at Georgia Tech that are female	3	[2]	ChatGPT	Yes	Yes	High	0.4	0.3972	Yes	https://lite.gatech.edu/lite_script/dashboards/enrollment.html	Feasible	Georgia Tech's undergraduate female enrollment has historically been around 40%, though this percentage has varied slightly over the years. Confidence Score: 0.85 <answer>40</answer>	Multiplication	Begin
gatech	TITLE: Harassment on campus I'm a junior at tech and I just feel so annoyed with all the catcalling/harassment I've been getting recently. I wear pretty modest clothing as a girl and I'm not doing anything to draw attention to myself, but it feels like alot of the time I walk across campus some guy is hitting on me or yelling at me. i'm just not comfortable walking around campus alone at certain …	I just feel so annoyed with all the catcalling/harassment I've been getting	personal_experience	Percentage of women in college that have experienced catcalling on their college campus	4	[1,2]	ChatGPT	Yes	No	Low	0.45	0.81	Yes	https://themontclarion.org/opinion/cat-calling-the-college-epidemic/	Feasible	Studies focused on harassment on college campuses indicate that around 40-50% of women report experiencing catcalling or similar harassment on campus. Confidence Score: 0.75 <answer>45</answer>	Multiplication	Out
