# Supplementary material
Source: ML conference proceedings conference paper supplement (https://openreview.net/forum?id=HMVQ00vabY)
Supplement: supplementary_material [file 2.xlsx]

## Sheet: Ordering 1
Subreddit	Post	Disclosure (Ordering)	Disclosure Category	Query	ID	Conditionally Independent?	Source Used	Succeeded?	Reliable?	Annotator Confidence	Value	Ground Truth	Ground Truth Reliability	Ground Truth Source	Disclosure Type	ChatGPT Response	Operation	Parentheses
gatech	TITLE: Stress levels are high and I can't stop crying Hey guys. I'm a mechE junior here at gatech and its almost finals week and I'm counting the days until the sem ends. Ever since September, I've been stressing about my classes like crazy and I can barely sleep because I am constantly having anxiety attacks at night. My prof keeps piling on homework and projects to study for. I have tons of ass…	I'm a mechE junior here at gatech	Education	Number of undergraduate students at Georgia Tech	1	[]	ChatGPT	Yes	No	Low	16500	20592	Yes	https://lite.gatech.edu/lite_script/dashboards/enrollment.html	Feasible	Georgia Tech has a significant undergraduate population, and as of recent data, the number typically ranges around 16,000 to 17,000 undergraduates. **Calculation/Estimation**: The historical average falls between 16,000-17,000 based on enrollment trends in previous years. Confidence Score: 0.9 <answer>16500</answer>	Multiplication	Out
gatech	TITLE: Stress levels are high and I can't stop crying Hey guys. I'm a mechE junior here at gatech and its almost finals week and I'm counting the days until the sem ends. Ever since September, I've been stressing about my classes like crazy and I can barely sleep because I am constantly having anxiety attacks at night. My prof keeps piling on homework and projects to study for. I have tons of ass…	I'm a mechE junior here at gatech	Education	Number of undergraduate class levels	2	[]	ChatGPT	Yes	Yes	High	4	4	Yes	https://lite.gatech.edu/lite_script/dashboards/enrollment.html	Feasible	In a typical undergraduate structure in the U.S., there are four class levels: freshman, sophomore, junior, and senior. Confidence Score: 1.0 <answer>4</answer>	(Division, 1)	In
gatech	TITLE: Stress levels are high and I can't stop crying Hey guys. I'm a mechE junior here at gatech and its almost finals week and I'm counting the days until the sem ends. Ever since September, I've been stressing about my classes like crazy and I can barely sleep because I am constantly having anxiety attacks at night. My prof keeps piling on homework and projects to study for. I have tons of ass…	I'm a mechE junior here at gatech	Education	Percentage of undergraduate students at Georgia Tech that are majoring in mechanical engineering	3	[2]	ChatGPT	Yes	Yes	High	0.12	0.0889	Yes	https://lite.gatech.edu/lite_script/dashboards/enrollment.html	Feasible	Historically, approximately 10-15% of Georgia Tech’s undergraduate students major in mechanical engineering, given its prominence as one of the school's largest programs. Confidence Score: 0.85 <answer>12</answer>	Multiplication	Out
gatech	TITLE: Stress levels are high and I can't stop crying Hey guys. I'm a mechE junior here at gatech and its almost finals week and I'm counting the days until the sem ends. Ever since September, I've been stressing about my classes like crazy and I can barely sleep because I am constantly having anxiety attacks at night. My prof keeps piling on homework and projects to study for. I have tons of ass…	I'm a member of a few clubs on campus	Education	Percentage of college students that are involved in student clubs or organizations	4	[1,2,3]	ChatGPT	Yes	Yes	High	0.65	0.6	Yes	https://www.ucop.edu/institutional-research-academic-planning/_files/extra-curricular-participation-and-student-success.pdf	Feasible	Based on historical data, approximately 60-70% of college students participate in student clubs or organizations. Confidence Score: 0.8 <answer>65</answer>	Multiplication	Out
gatech	TITLE: Stress levels are high and I can't stop crying Hey guys. I'm a mechE junior here at gatech and its almost finals week and I'm counting the days until the sem ends. Ever since September, I've been stressing about my classes like crazy and I can barely sleep because I am constantly having anxiety attacks at night. My prof keeps piling on homework and projects to study for. I have tons of ass…	I can barely sleep because I am constantly having anxiety attacks	Mental Health	Percentage of college students that face severe anxiety	5	[1,2,3,4]	ChatGPT	Yes	Yes	High	0.3	0.32	Yes	https://www.sciencedirect.com/science/article/pii/S2666915323001968	Feasible	Research shows that around 30% of college students report experiencing severe anxiety affecting their daily activities. Confidence Score: 0.85 <answer>30</answer>	Multiplication	Out

## Sheet: Ordering 2
Subreddit	Post	Disclosure (Ordering)	Disclosure Category	Query	ID	Conditionally Independent?	Source Used	Succeeded?	Reliable?	Annotator Confidence	Value	Ground Truth	Ground Truth Reliability	Ground Truth Source	Disclosure Type	ChatGPT Response	Operation	Parentheses
gatech	TITLE: Stress levels are high and I can't stop crying Hey guys. I'm a mechE junior here at gatech and its almost finals week and I'm counting the days until the sem ends. Ever since September, I've been stressing about my classes like crazy and I can barely sleep because I am constantly having anxiety attacks at night. My prof keeps piling on homework and projects to study for. I have tons of ass…	I'm a mechE junior here at gatech	education	Number of undergraduate students at Georgia Tech	1	[]	ChatGPT	Yes	No	Low	16500	20592	Yes	https://lite.gatech.edu/lite_script/dashboards/enrollment.html	Feasible	Georgia Tech has a significant undergraduate population, and as of recent data, the number typically ranges around 16,000 to 17,000 undergraduates. **Calculation/Estimation**: The historical average falls between 16,000-17,000 based on enrollment trends in previous years. Confidence Score: 0.9 <answer>16500</answer>	Multiplication	Out
gatech	TITLE: Stress levels are high and I can't stop crying Hey guys. I'm a mechE junior here at gatech and its almost finals week and I'm counting the days until the sem ends. Ever since September, I've been stressing about my classes like crazy and I can barely sleep because I am constantly having anxiety attacks at night. My prof keeps piling on homework and projects to study for. I have tons of ass…	I'm a mechE junior here at gatech	education	Number of undergraduate class levels	2	[]	ChatGPT	Yes	Yes	High	4	4	Yes	https://lite.gatech.edu/lite_script/dashboards/enrollment.html	Feasible	In a typical undergraduate structure in the U.S., there are four class levels: freshman, sophomore, junior, and senior. Confidence Score: 1.0 <answer>4</answer>	(Division, 1)	In
gatech	TITLE: Stress levels are high and I can't stop crying Hey guys. I'm a mechE junior here at gatech and its almost finals week and I'm counting the days until the sem ends. Ever since September, I've been stressing about my classes like crazy and I can barely sleep because I am constantly having anxiety attacks at night. My prof keeps piling on homework and projects to study for. I have tons of ass…	I'm a mechE junior here at gatech	education	Percentage of undergraduate students at Georgia Tech that are majoring in mechanical engineering	3	[2]	ChatGPT	Yes	Yes	High	0.12	0.0889	Yes	https://lite.gatech.edu/lite_script/dashboards/enrollment.html	Feasible	Historically, approximately 10-15% of Georgia Tech’s undergraduate students major in mechanical engineering, given its prominence as one of the school's largest programs. Confidence Score: 0.85 <answer>12</answer>	Multiplication	Out
gatech	TITLE: Stress levels are high and I can't stop crying Hey guys. I'm a mechE junior here at gatech and its almost finals week and I'm counting the days until the sem ends. Ever since September, I've been stressing about my classes like crazy and I can barely sleep because I am constantly having anxiety attacks at night. My prof keeps piling on homework and projects to study for. I have tons of ass…	I'm a member of a few clubs on campus	education	Percentage of college students that are involved in student clubs or organizations	4	[1,2,3]	ChatGPT	Yes	Yes	High	0.65	0.6	Yes	https://www.ucop.edu/institutional-research-academic-planning/_files/extra-curricular-participation-and-student-success.pdf	Feasible	Based on historical data, approximately 60-70% of college students participate in student clubs or organizations. Confidence Score: 0.8 <answer>65</answer>	Multiplication	Out
gatech	TITLE: Stress levels are high and I can't stop crying Hey guys. I'm a mechE junior here at gatech and its almost finals week and I'm counting the days until the sem ends. Ever since September, I've been stressing about my classes like crazy and I can barely sleep because I am constantly having anxiety attacks at night. My prof keeps piling on homework and projects to study for. I have tons of ass…	I can barely sleep because I am constantly having anxiety attacks	mental_health	Percentage of college students that face severe anxiety	5	[1,2,3,4]	ChatGPT	Yes	Yes	High	0.3	0.32	Yes	https://www.sciencedirect.com/science/article/pii/S2666915323001968	Feasible	Research shows that around 30% of college students report experiencing severe anxiety affecting their daily activities. Confidence Score: 0.85 <answer>30</answer>	Multiplication	Out
gatech	TITLE: Stress levels are high and I can't stop crying Hey guys. I'm a mechE junior here at gatech and its almost finals week and I'm counting the days until the sem ends. Ever since September, I've been stressing about my classes like crazy and I can barely sleep because I am constantly having anxiety attacks at night. My prof keeps piling on homework and projects to study for. I have tons of ass…	I can't stop crying	health	Percentage of US population that cries at least once a week	6	[1,2,3,4,5]	ChatGPT	Yes	Yes	High	0.23	0.22	Yes	https://yougov.co.uk/society/articles/13074-women-cry	Feasible	Studies suggest that about 20-25% of the U.S. population reports crying at least once a week, with some variation by gender and age group. Confidence Score: 0.75 <answer>23</answer>	Multiplication	Out
