# Supplementary material
Source: ML conference proceedings conference paper supplement (https://openreview.net/forum?id=HMVQ00vabY)
Supplement: supplementary_material [file 2.xlsx]

## Sheet: Ordering 1
Subreddit	Post	Disclosure (Ordering)	Disclosure Category	Query	ID	Conditionally Independent?	Source Used	Succeeded?	Reliable?	Annotator Confidence	Value	Ground Truth	Ground Truth Reliability	Ground Truth Source	Disclosure Type	ChatGPT Response	Operation	Parentheses
gatech	TITLE: Question about CS graduate programs at Tech Hi! I'm working at a FAANG company, and I'm trying to decide between a few grad programs at GTech. I'm interested in learning more about the different research areas and professors in the CS department, but I'm not sure which program is the best fit for me. I'm applying as an international student from India, and I'm looking for a program that wi…	grad programs at GTech	education	number of graduate students at Georgia Tech	1	[]	ChatGPT	Yes	Yes	Medium	16000	23755	Yes	https://irp.gatech.edu/disclosures/student-demographics	Feasible	Thought Process: Understanding the Query: The query seeks the total number of graduate students (master’s and PhD) currently enrolled at Georgia Tech. Relevant Data: Georgia Tech is a research-intensive institution with a significant graduate student population. Recent data indicates that graduate students make up a large portion of the student body, almost equal to or slightly exceeding the unde…	Multiplication	Out
gatech	TITLE: Question about CS graduate programs at Tech Hi! I'm working at a FAANG company, and I'm trying to decide between a few grad programs at GTech. I'm interested in learning more about the different research areas and professors in the CS department, but I'm not sure which program is the best fit for me. I'm applying as an international student from India, and I'm looking for a program that wi…	international student	race_nationality	percentage of graduate students at Georgia Tech that are international students	2	[]	ChatGPT	Yes	No	High	0.55	0.362	Yes	https://irp.gatech.edu/disclosures/student-demographics	Feasible	Thought Process: Understanding the Query: The query asks for the percentage of graduate students at Georgia Tech who are international students. Graduate programs, especially at research-focused institutions like Georgia Tech, typically attract a significant number of international students. Relevant Data: Georgia Tech is renowned for its STEM and research-oriented programs, which are highly attr…	Multiplication	Out
gatech	TITLE: Question about CS graduate programs at Tech Hi! I'm working at a FAANG company, and I'm trying to decide between a few grad programs at GTech. I'm interested in learning more about the different research areas and professors in the CS department, but I'm not sure which program is the best fit for me. I'm applying as an international student from India, and I'm looking for a program that wi…	from India	race_nationality	Percentage of international students at Georgia Tech that are from India	3	[1]	ChatGPT	Yes	Yes	Medium	0.22	0.253	No	https://www.collegefactual.com/colleges/georgia-institute-of-technology-main-campus/student-life/international/#:~:text=Indian%20students%20could%20account%20for,student%20body%20at%20Georgia%20Tech.	Feasible	To estimate the percentage of international students at Georgia Tech who are from India: Understand the Query: The query is asking for the proportion of international students at Georgia Tech who are from India. Review Data: Indian students represent a significant portion of the international student body at many U.S. universities, including Georgia Tech. Historically, Indian students often make …	Multiplication	Out
gatech	TITLE: Question about CS graduate programs at Tech Hi! I'm working at a FAANG company, and I'm trying to decide between a few grad programs at GTech. I'm interested in learning more about the different research areas and professors in the CS department, but I'm not sure which program is the best fit for me. I'm applying as an international student from India, and I'm looking for a program that wi…	CS department	education	Percentage of graduate students at Georgia Tech that are in the CS department	4	[2, 3]	ChatGPT	Yes	Yes	Medium	0.65	0.5889	Yes	https://www.cc.gatech.edu/facts-and-rankings	Feasible	Thought Process: Understanding the Query: The query is asking for the percentage of graduate students at Georgia Tech who are in the Computer Science (CS) department specifically, which includes programs such as on-campus and online master's and PhD programs. Relevant Data: Georgia Tech has around 16,000 graduate students. The College of Computing, primarily through the CS department, is one of t…	Multiplication	Out
gatech	TITLE: Question about CS graduate programs at Tech Hi! I'm working at a FAANG company, and I'm trying to decide between a few grad programs at GTech. I'm interested in learning more about the different research areas and professors in the CS department, but I'm not sure which program is the best fit for me. I'm applying as an international student from India, and I'm looking for a program that wi…	FAANG company	occupation	Percentage of graduate students at Georgia Tech that work a full time job while studying	5	[2, 3, 4]	ChatGPT	Yes	No	Medium	0.55	0.76	No	https://www.idealist.org/en/careers/grad-school-full-time-job	Feasible	Thought Process: Understanding the Query: The query seeks the percentage of graduate students at Georgia Tech who are working a full-time job while pursuing their studies. Relevant Data: Many graduate students, especially those enrolled in online programs like Georgia Tech’s Online Master of Science in Computer Science (OMSCS), work full-time jobs while studying. On-campus graduate students, part…	Multiplication	Out

## Sheet: Ordering 2
Subreddit	Post	Disclosure (Ordering)	Disclosure Category	Query	ID	Conditionally Independent?	Source Used	Succeeded?	Reliable?	Annotator Confidence	Value	Ground Truth	Ground Truth Reliability	Ground Truth Source	Disclosure Type	ChatGPT Response	Operation	Parentheses
gatech	TITLE: Question about CS graduate programs at Tech Hi! I'm working at a FAANG company, and I'm trying to decide between a few grad programs at GTech. I'm interested in learning more about the different research areas and professors in the CS department, but I'm not sure which program is the best fit for me. I'm applying as an international student from India, and I'm looking for a program that wi…	grad programs at GTech	education	number of graduate students at Georgia Tech	1	[]	ChatGPT	Yes	Yes	Medium	16000	23755	Yes	https://irp.gatech.edu/disclosures/student-demographics	Feasible	Thought Process: Understanding the Query: The query seeks the total number of graduate students (master’s and PhD) currently enrolled at Georgia Tech. Relevant Data: Georgia Tech is a research-intensive institution with a significant graduate student population. Recent data indicates that graduate students make up a large portion of the student body, almost equal to or slightly exceeding the unde…	Multiplication	Out
gatech	TITLE: Question about CS graduate programs at Tech Hi! I'm working at a FAANG company, and I'm trying to decide between a few grad programs at GTech. I'm interested in learning more about the different research areas and professors in the CS department, but I'm not sure which program is the best fit for me. I'm applying as an international student from India, and I'm looking for a program that wi…	international student	race_nationality	percentage of graduate students at Georgia Tech that are international students	2	[]	ChatGPT	Yes	No	High	0.55	0.362	Yes	https://irp.gatech.edu/disclosures/student-demographics	Feasible	Thought Process: Understanding the Query: The query asks for the percentage of graduate students at Georgia Tech who are international students. Graduate programs, especially at research-focused institutions like Georgia Tech, typically attract a significant number of international students. Relevant Data: Georgia Tech is renowned for its STEM and research-oriented programs, which are highly attr…	Multiplication	Out
gatech	TITLE: Question about CS graduate programs at Tech Hi! I'm working at a FAANG company, and I'm trying to decide between a few grad programs at GTech. I'm interested in learning more about the different research areas and professors in the CS department, but I'm not sure which program is the best fit for me. I'm applying as an international student from India, and I'm looking for a program that wi…	from India	race_nationality	Percentage of international students at Georgia Tech that are from India	3	[1]	ChatGPT	Yes	Yes	Medium	0.22	0.253	No	https://www.collegefactual.com/colleges/georgia-institute-of-technology-main-campus/student-life/international/#:~:text=Indian%20students%20could%20account%20for,student%20body%20at%20Georgia%20Tech.	Feasible	To estimate the percentage of international students at Georgia Tech who are from India: Understand the Query: The query is asking for the proportion of international students at Georgia Tech who are from India. Review Data: Indian students represent a significant portion of the international student body at many U.S. universities, including Georgia Tech. Historically, Indian students often make …	Multiplication	Out
gatech	TITLE: Question about CS graduate programs at Tech Hi! I'm working at a FAANG company, and I'm trying to decide between a few grad programs at GTech. I'm interested in learning more about the different research areas and professors in the CS department, but I'm not sure which program is the best fit for me. I'm applying as an international student from India, and I'm looking for a program that wi…	CS department	education	Percentage of graduate students at Georgia Tech that are in the CS department	4	[2, 3]	ChatGPT	Yes	Yes	Medium	0.65	0.5889	Yes	https://www.cc.gatech.edu/facts-and-rankings	Feasible	Thought Process: Understanding the Query: The query is asking for the percentage of graduate students at Georgia Tech who are in the Computer Science (CS) department specifically, which includes programs such as on-campus and online master's and PhD programs. Relevant Data: Georgia Tech has around 16,000 graduate students. The College of Computing, primarily through the CS department, is one of t…	Multiplication	Out
gatech	TITLE: Question about CS graduate programs at Tech Hi! I'm working at a FAANG company, and I'm trying to decide between a few grad programs at GTech. I'm interested in learning more about the different research areas and professors in the CS department, but I'm not sure which program is the best fit for me. I'm applying as an international student from India, and I'm looking for a program that wi…	FAANG company	occupation	Percentage of CS graduate students at Georgia Tech that end up working at a FAANG company	5	[2, 3]	ChatGPT	Yes	No	Low	0.18	0.0006	No	https://www.collegetransitions.com/dataverse/top-feeders-tech	Feasible	Thought Process: Understanding the Query: The focus is solely on Georgia Tech CS students who work at FAANG companies (Facebook, Apple, Amazon, Netflix, Google) specifically, excluding other tech companies. Relevant Data: Georgia Tech's CS program is prestigious, and FAANG companies heavily recruit from top programs. FAANG hires are highly sought-after but represent a limited subset of total job …	Multiplication	Out
