# Supplementary material
Source: ML conference proceedings conference paper supplement (https://openreview.net/forum?id=HMVQ00vabY)
Supplement: supplementary_material [file 3.xlsx]

## Sheet: Sheet1
Subreddit	Post	Disclosure (Ordering)	Disclosure Category	Query	ID	Conditionally Independent?	Source Used	Succeeded?	Reliable?	Annotator Confidence	Value	Ground Truth	Ground Truth Reliability	Ground Truth Source	Disclosure Type	ChatGPT Response	Operation	Parentheses
gatech	TITLE: PhD student budget Hey y'all, I'm a first year PhD student here at GT in the ECE department. I'm a research assistant so with my stipend Im making around $2500 after taxes. The expenses are like 1400-1500/mo for a 1br apartment. I have a lot to cut back on, so I am trying my best to make the most of what I have. Was wondering if anyone knows any good, cheap grocery stores in the Atlanta ar…	PhD student here at GT	education	number of PhD students at Georgia Tech	1	[]	ChatGPT	Yes	Yes	High	4000	3953	Yes	https://grad.gatech.edu/news/celebrating-new-school-year-and-growth-graduate-enrollment-georgia-tech#:~:text=In%20addition%20to%20the%20overall,the%20future%20through%20technological%20advancements.%E2%80%9D	Feasible	Thought Process: Understanding the Query: The query asks for the number of PhD students enrolled at Georgia Tech, which is a subset of the total graduate student population. Relevant Data: Georgia Tech has approximately 16,000 graduate students. A significant portion of these are master's students, particularly from the OMSCS program, which skews the numbers toward master's-level enrollments. Bas…	Multiplication	Out
gatech	TITLE: PhD student budget Hey y'all, I'm a first year PhD student here at GT in the ECE department. I'm a research assistant so with my stipend Im making around $2500 after taxes. The expenses are like 1400-1500/mo for a 1br apartment. I have a lot to cut back on, so I am trying my best to make the most of what I have. Was wondering if anyone knows any good, cheap grocery stores in the Atlanta ar…	first year	education	percentage of PhD students at Georgia Tech that are first years	2	[]	ChatGPT	Yes	Yes	High	0.18	0.1538	Yes	https://psychology.gatech.edu/graduate/faq#:~:text=How%20long%20does%20the%20program,of%206.5%20years%20to%20complete.	Feasible	Thought Process: Understanding the Query: The query seeks the percentage of PhD students at Georgia Tech who are in their first year of study. Relevant Data: A PhD program typically lasts 5-7 years, with the average being around 5-6 years. Assuming an even distribution of students across these years, the percentage of first-year PhD students would roughly be 1/5 to 1/6 of the total PhD population…	Multiplication	Out
gatech	TITLE: PhD student budget Hey y'all, I'm a first year PhD student here at GT in the ECE department. I'm a research assistant so with my stipend Im making around $2500 after taxes. The expenses are like 1400-1500/mo for a 1br apartment. I have a lot to cut back on, so I am trying my best to make the most of what I have. Was wondering if anyone knows any good, cheap grocery stores in the Atlanta ar…	in the ECE department	education	percentage of PhD students at Georgia Tech that are in the ECE department	3	[2]	ChatGPT	Yes	No	High	0.27	0.0418	Yes	https://ece.gatech.edu/academics/overview	Feasible	Thought Process: Understanding the Query: The query seeks the percentage of PhD students at Georgia Tech who are enrolled in the Electrical and Computer Engineering (ECE) department. Relevant Data: The ECE department at Georgia Tech is one of the largest and most popular graduate programs, especially for PhD students, due to its strong research focus. Historically, ECE PhD programs tend to attrac…	Multiplication	Out
gatech	TITLE: PhD student budget Hey y'all, I'm a first year PhD student here at GT in the ECE department. I'm a research assistant so with my stipend Im making around $2500 after taxes. The expenses are like 1400-1500/mo for a 1br apartment. I have a lot to cut back on, so I am trying my best to make the most of what I have. Was wondering if anyone knows any good, cheap grocery stores in the Atlanta ar…	research assistant	education	percentage of PhD students at Georgia Tech that are research assistants	4	[2, 3]	ChatGPT	Yes	No	Medium	0.65	0.8	Yes	https://grad.gatech.edu/prospective-students#:~:text=Paying%20for%20Grad%20School,-Financial%20assistance%20for&text=About%20half%20of%20Georgia%20Tech's,out%20of%20five%20doctoral%20students.	Feasible	Thought Process: Understanding the Query: The query seeks the percentage of PhD students at Georgia Tech who are working as research assistants (RAs). Relevant Data: Many PhD students, especially at research universities like Georgia Tech, are funded through Research Assistantships (RAs), where they assist in faculty research projects. It is common for 50-70% of PhD students in STEM fields to be …	Multiplication	Out
gatech	TITLE: PhD student budget Hey y'all, I'm a first year PhD student here at GT in the ECE department. I'm a research assistant so with my stipend Im making around $2500 after taxes. The expenses are like 1400-1500/mo for a 1br apartment. I have a lot to cut back on, so I am trying my best to make the most of what I have. Was wondering if anyone knows any good, cheap grocery stores in the Atlanta ar…	1400-1500/mo for a 1br apartment	finance	percentage of PhD students at Georgia Tech that live off campus in a 1 bedroom apartment for 1400-1500 dollars per month	5	[2, 3, 4]	ChatGPT	Yes	Yes	Medium	0.2	0.176	No	https://www.usnews.com/best-colleges/georgia-institute-of-technology-1569/student-life https://www.apartments.com/rent-market-trends/atlanta-ga/#:~:text=How%20much%20has%20average%20rent,Market%20Trends%20Over%20Time&text=3%25%20Below%20$700/mo.,16%25%20Above%20$2%2C000/mo.	Feasible	Thought Process: Understanding the Query: The query asks for the percentage of PhD students at Georgia Tech who live off-campus in a 1-bedroom apartment that costs between $1400-$1500 per month. Relevant Data: A significant number of graduate students, including PhD students, live off-campus due to the high cost of on-campus housing and the availability of more affordable options nearby. Rental p…	Multiplication	Out

## Sheet: Sheet2
Subreddit	Post	Disclosure (Ordering)	Disclosure Category	Query	ID	Conditionally Independent?	Source Used	Succeeded?	Reliable?	Annotator Confidence	Value	Ground Truth	Ground Truth Reliability	Ground Truth Source	Disclosure Type	ChatGPT Response	Operation	Parentheses
gatech	TITLE: PhD student budget Hey y'all, I'm a first year PhD student here at GT in the ECE department. I'm a research assistant so with my stipend Im making around $2500 after taxes. The expenses are like 1400-1500/mo for a 1br apartment. I have a lot to cut back on, so I am trying my best to make the most of what I have. Was wondering if anyone knows any good, cheap grocery stores in the Atlanta ar…	PhD student here at GT	education	number of PhD students at Georgia Tech	1	[]	ChatGPT	Yes	Yes	High	4000	3953	Yes	https://grad.gatech.edu/news/celebrating-new-school-year-and-growth-graduate-enrollment-georgia-tech#:~:text=In%20addition%20to%20the%20overall,the%20future%20through%20technological%20advancements.%E2%80%9D	Feasible	Thought Process: Understanding the Query: The query asks for the number of PhD students enrolled at Georgia Tech, which is a subset of the total graduate student population. Relevant Data: Georgia Tech has approximately 16,000 graduate students. A significant portion of these are master's students, particularly from the OMSCS program, which skews the numbers toward master's-level enrollments. Bas…	Multiplication	Out
gatech	TITLE: PhD student budget Hey y'all, I'm a first year PhD student here at GT in the ECE department. I'm a research assistant so with my stipend Im making around $2500 after taxes. The expenses are like 1400-1500/mo for a 1br apartment. I have a lot to cut back on, so I am trying my best to make the most of what I have. Was wondering if anyone knows any good, cheap grocery stores in the Atlanta ar…	first year	education	percentage of PhD students at Georgia Tech that are first years	2	[]	ChatGPT	Yes	Yes	High	0.18	0.1538	Yes	https://psychology.gatech.edu/graduate/faq#:~:text=How%20long%20does%20the%20program,of%206.5%20years%20to%20complete.	Feasible	Thought Process: Understanding the Query: The query seeks the percentage of PhD students at Georgia Tech who are in their first year of study. Relevant Data: A PhD program typically lasts 5-7 years, with the average being around 5-6 years. Assuming an even distribution of students across these years, the percentage of first-year PhD students would roughly be 1/5 to 1/6 of the total PhD population…	Multiplication	Out
gatech	TITLE: PhD student budget Hey y'all, I'm a first year PhD student here at GT in the ECE department. I'm a research assistant so with my stipend Im making around $2500 after taxes. The expenses are like 1400-1500/mo for a 1br apartment. I have a lot to cut back on, so I am trying my best to make the most of what I have. Was wondering if anyone knows any good, cheap grocery stores in the Atlanta ar…	in the ECE department	education	percentage of PhD students at Georgia Tech that are in the ECE department	3	[2]	ChatGPT	Yes	No	High	0.27	0.0418	Yes	https://ece.gatech.edu/academics/overview	Feasible	Thought Process: Understanding the Query: The query seeks the percentage of PhD students at Georgia Tech who are enrolled in the Electrical and Computer Engineering (ECE) department. Relevant Data: The ECE department at Georgia Tech is one of the largest and most popular graduate programs, especially for PhD students, due to its strong research focus. Historically, ECE PhD programs tend to attrac…	Multiplication	Out
gatech	TITLE: PhD student budget Hey y'all, I'm a first year PhD student here at GT in the ECE department. I'm a research assistant so with my stipend Im making around $2500 after taxes. The expenses are like 1400-1500/mo for a 1br apartment. I have a lot to cut back on, so I am trying my best to make the most of what I have. Was wondering if anyone knows any good, cheap grocery stores in the Atlanta ar…	research assistant	education	percentage of PhD students at Georgia Tech that are research assistants	4	[2, 3]	ChatGPT	Yes	No	Medium	0.65	0.8	Yes	https://grad.gatech.edu/prospective-students#:~:text=Paying%20for%20Grad%20School,-Financial%20assistance%20for&text=About%20half%20of%20Georgia%20Tech's,out%20of%20five%20doctoral%20students.	Feasible	Thought Process: Understanding the Query: The query seeks the percentage of PhD students at Georgia Tech who are working as research assistants (RAs). Relevant Data: Many PhD students, especially at research universities like Georgia Tech, are funded through Research Assistantships (RAs), where they assist in faculty research projects. It is common for 50-70% of PhD students in STEM fields to be …	Multiplication	Out
