# Supplementary material
Source: ML conference proceedings conference paper supplement (https://openreview.net/forum?id=HMVQ00vabY)
Supplement: supplementary_material [file 3.xlsx]

## Sheet: Ordering 1
Subreddit	Post	Disclosure (Ordering)	Disclosure Category	Query	ID	Conditionally Independent?	Source Used	Succeeded?	Reliable?	Annotator Confidence	Value	Ground Truth	Ground Truth Reliability	Ground Truth Source	Disclosure Type	ChatGPT Response	Operation	Parentheses
oakland	TITLE: PT recommendations Hey Oakland, I'm looking for a good physical therapist to help me manage my osteonecrosis. I've been experiencing some pain and stiffness in my joints and I'm hoping to find someone who can help me get back on my feet (literally lol). I'm 43 and have been living here for a while now. I've tried a few different PTs in the area in the past, but I'm not sure if they're the …	Oakland	location	Population of Oakland, CA	1	[]	ChatGPT	Yes	Yes	High	440000	436508	Yes	https://censusreporter.org/profiles/16000US0653000-oakland-ca/	Feasible	Oakland, CA, has an estimated population of around 440,000 based on recent census data trends. Confidence Score: 0.9 <answer>440000</answer>	Multiplication	Out
oakland	TITLE: PT recommendations Hey Oakland, I'm looking for a good physical therapist to help me manage my osteonecrosis. I've been experiencing some pain and stiffness in my joints and I'm hoping to find someone who can help me get back on my feet (literally lol). I'm 43 and have been living here for a while now. I've tried a few different PTs in the area in the past, but I'm not sure if they're the …	I'm 43	age	Percentage of people in Oakland, CA, that are ages 40-49	2	[]	ChatGPT	Yes	Yes	High	0.12	0.15	Yes	https://censusreporter.org/profiles/16000US0653000-oakland-ca/	Feasible	The percentage of people in Oakland, CA, in the 40-49 age range is estimated to be around 12%, based on recent demographic data. Confidence Score: 0.8 <answer>12</answer>	Multiplication	Begin
oakland	TITLE: PT recommendations Hey Oakland, I'm looking for a good physical therapist to help me manage my osteonecrosis. I've been experiencing some pain and stiffness in my joints and I'm hoping to find someone who can help me get back on my feet (literally lol). I'm 43 and have been living here for a while now. I've tried a few different PTs in the area in the past, but I'm not sure if they're the …	I'm 43	age	Number of years in the age range 40-49	3	[]	ChatGPT	Yes	Yes	High	10	10	Yes		Feasible	The age range 40-49 includes 10 years. Confidence Score: 1.0 <answer>10</answer>	(Division, 1)	In
oakland	TITLE: PT recommendations Hey Oakland, I'm looking for a good physical therapist to help me manage my osteonecrosis. I've been experiencing some pain and stiffness in my joints and I'm hoping to find someone who can help me get back on my feet (literally lol). I'm 43 and have been living here for a while now. I've tried a few different PTs in the area in the past, but I'm not sure if they're the …	my osteonecrosis	health	Percentage of US population that suffers from osteonecrosis	4	[1,2,3]	ChatGPT	Yes	Yes	High	0.001	0.004	Yes	https://pmc.ncbi.nlm.nih.gov/articles/PMC6502772/#:~:text=Osteonecrosis%20in%20the%20general%20population,%2C%204.6%20to%204.7%20cases).	Feasible	Osteonecrosis is a relatively rare condition, and it is estimated that around 0.1% of the U.S. population suffers from it. Confidence Score: 0.8 <answer>0.1</answer>	Multiplication	Out
oakland	TITLE: PT recommendations Hey Oakland, I'm looking for a good physical therapist to help me manage my osteonecrosis. I've been experiencing some pain and stiffness in my joints and I'm hoping to find someone who can help me get back on my feet (literally lol). I'm 43 and have been living here for a while now. I've tried a few different PTs in the area in the past, but I'm not sure if they're the …	I've tried a few different PTs	health	Percentage of US population that has received physical therapy	5	[1,2,3,4]	ChatGPT	Yes	No	Low	0.25	0.5	Yes	https://business.yougov.com/content/49296-how-many-americans-is-physical-therapy-helping	Feasible	**Thought Process**: Physical therapy usage is common among adults aged 35-54 due to increased prevalence of musculoskeletal issues, injuries, and chronic conditions in this age group. Estimates from health surveys suggest that around **20% to 30%** of adults in this age range have received physical therapy at some point. A reasonable estimate is **25%**. **Confidence Score**: 0.75 <answer>25</an…	Multiplication	Out

## Sheet: Ordering 2
Subreddit	Post	Disclosure (Ordering)	Disclosure Category	Query	ID	Conditionally Independent?	Source Used	Succeeded?	Reliable?	Annotator Confidence	Value	Ground Truth	Ground Truth Reliability	Ground Truth Source	Disclosure Type	ChatGPT Response	Operation	Parentheses
oakland	TITLE: PT recommendations Hey Oakland, I'm looking for a good physical therapist to help me manage my osteonecrosis. I've been experiencing some pain and stiffness in my joints and I'm hoping to find someone who can help me get back on my feet (literally lol). I'm 43 and have been living here for a while now. I've tried a few different PTs in the area in the past, but I'm not sure if they're the …	I'm looking for a good physical therapist to help me manage my osteonecrosis	health	Number of people each year in the US that require treatment for osteonecrosis of the hip	1	[]	ChatGPT	Yes	No	Medium	15000	20000	Yes	https://www.thepermanentejournal.org/doi/10.7812/TPP/18-100	Feasible	Approximately 10,000 to 20,000 people in the U.S. are treated for osteonecrosis of the hip each year. Confidence Score: 0.8 <answer>15000</answer>	Multiplication	Out
oakland	TITLE: PT recommendations Hey Oakland, I'm looking for a good physical therapist to help me manage my osteonecrosis. I've been experiencing some pain and stiffness in my joints and I'm hoping to find someone who can help me get back on my feet (literally lol). I'm 43 and have been living here for a while now. I've tried a few different PTs in the area in the past, but I'm not sure if they're the …	I'm 43	age	Percentage of people in the 40-65 age range	2	[]	ChatGPT	Yes	Yes	High	0.0385	0.0385	Yes	https://orthoinfo.aaos.org/en/diseases--conditions/osteonecrosis-of-the-hip/	Feasible	The age range 40-65 includes 26 years. Confidence Score: 1.0 <answer>26</answer>	Multiplication	Out
oakland	TITLE: PT recommendations Hey Oakland, I'm looking for a good physical therapist to help me manage my osteonecrosis. I've been experiencing some pain and stiffness in my joints and I'm hoping to find someone who can help me get back on my feet (literally lol). I'm 43 and have been living here for a while now. I've tried a few different PTs in the area in the past, but I'm not sure if they're the …	Oakland	location	Percentage of US population that lives in Oakland, CA	3	[1,2]	ChatGPT	Yes	Yes	High	0.0013	0.0013	Yes	https://censusreporter.org/profiles/16000US0653000-oakland-ca/	Feasible	Oakland, CA, has a population of approximately 440,000, while the U.S. population is around 330 million. Calculating the percentage: \[ \frac{440,000}{330,000,000} \times 100 \approx 0.13\% \] Confidence Score: 0.9 <answer>0.13</answer>	Multiplication	Out
oakland	TITLE: PT recommendations Hey Oakland, I'm looking for a good physical therapist to help me manage my osteonecrosis. I've been experiencing some pain and stiffness in my joints and I'm hoping to find someone who can help me get back on my feet (literally lol). I'm 43 and have been living here for a while now. I've tried a few different PTs in the area in the past, but I'm not sure if they're the …	I've been experiencing some pain and stiffness in my joints	health	Percentage of osteonecrosis patients in the US that are in Stage III of the disease	4	[1,2,3]	ChatGPT	Yes	No	Low	0.45	0.25	Yes	https://orthoinfo.aaos.org/en/diseases--conditions/osteonecrosis-of-the-hip/	Feasible	Approximately 40-50% of osteonecrosis patients in the U.S. are in Stage III, as this stage represents the progression to more severe symptoms before surgical intervention is often considered. Confidence Score: 0.75 <answer>45</answer>	Multiplication	Out
