# Supplementary material
Source: ML conference proceedings conference paper supplement (https://openreview.net/forum?id=HMVQ00vabY)
Supplement: supplementary_material [file 4.xlsx]

## Sheet: Ordering 1
Subreddit	Post	Disclosure (Ordering)	Disclosure Category	Query	ID	Conditionally Independent?	Source Used	Succeeded?	Reliable?	Annotator Confidence	Value	Ground Truth	Ground Truth Reliability	Ground Truth Source	Disclosure Type	ChatGPT Response	Operation	Parentheses
oakland	TITLE: Robbed at gunpoint while driving home from the grocery store in East Oakland last night. I'm still shaken. Last night around 9:30 pm, I was driving home from the grocery store on E 14th and 98th. I stopped at the red light, and a guy in a black hoodie and mask got into my car through the passenger door. He had a gun and told me to give him my purse. I gave him my purse, which had my ID, ba…	in East Oakland	location	population of East Oakland	1	[]	ChatGPT	Yes	No	High	154000	87000	Yes	https://en.wikipedia.org/wiki/East_Oakland,_Oakland,_California#:~:text=The%20area%20is%20a%20major,in%20the%20East%20Oakland%20area.	Feasible	East Oakland is a neighborhood within Oakland, California. The population of Oakland as of recent estimates is approximately 440,000, and East Oakland constitutes a significant portion of the city, roughly 30-40% of the population. Taking the middle of this range (35%), we estimate: 440,000 * 0.35 = 154,000. <answer>154000</answer> Confidence score: 0.85	Multiplication	Out
oakland	TITLE: Robbed at gunpoint while driving home from the grocery store in East Oakland last night. I'm still shaken. Last night around 9:30 pm, I was driving home from the grocery store on E 14th and 98th. I stopped at the red light, and a guy in a black hoodie and mask got into my car through the passenger door. He had a gun and told me to give him my purse. I gave him my purse, which had my ID, ba…	on E 14th and 98th	location	percentage of people in Oakland that travel to E 14th and 98th	2	[]	ChatGPT	Yes	No	Low	0.05	-1	No		Important	To estimate the percentage of people in Oakland who travel to the intersection of E 14th and 98th, I need to consider that this location is a specific intersection in the eastern part of Oakland, and many people in the area likely pass through or near it depending on their destination. However, it is not a central business district, and most people may not travel directly to this intersection. Ba…	Multiplication	Out
oakland	TITLE: Robbed at gunpoint while driving home from the grocery store in East Oakland last night. I'm still shaken. Last night around 9:30 pm, I was driving home from the grocery store on E 14th and 98th. I stopped at the red light, and a guy in a black hoodie and mask got into my car through the passenger door. He had a gun and told me to give him my purse. I gave him my purse, which had my ID, ba…	my purse	gender	percentage of people in Oakland that are women	3	[1, 2]	ChatGPT	Yes	Yes	High	0.51	0.508	Yes	https://www.census.gov/quickfacts/fact/table/oaklandcitycalifornia/HEA775223	Feasible	The gender distribution in Oakland is fairly balanced, with women typically comprising around 50-51% of the population in many U.S. cities. Based on recent census data for Oakland, women make up about 51% of the population. <answer>51</answer> Confidence score: 0.95	Multiplication	Out
oakland	TITLE: Robbed at gunpoint while driving home from the grocery store in East Oakland last night. I'm still shaken. Last night around 9:30 pm, I was driving home from the grocery store on E 14th and 98th. I stopped at the red light, and a guy in a black hoodie and mask got into my car through the passenger door. He had a gun and told me to give him my purse. I gave him my purse, which had my ID, ba…	robbed at gunpoint	crime	percentage of people in Oakland in the past year that are victims of robbery	4	[1, 2, 3]	ChatGPT	Yes	Yes	High	0.0041	0.008	Yes	https://www.cbsnews.com/sanfrancisco/news/oakland-crime-data-2023-complex-picture-property-crimes-homicides/	Feasible	To estimate the percentage of people in Oakland who were victims of robbery in the past year, I can look at recent crime statistics. Oakland has had a higher-than-average crime rate in the U.S., with robbery being a notable concern. Based on recent crime reports, Oakland had roughly 1,800 robberies reported in the last year. With a population of approximately 440,000, we can calculate the percent…	Multiplication	Out
oakland	TITLE: Robbed at gunpoint while driving home from the grocery store in East Oakland last night. I'm still shaken. Last night around 9:30 pm, I was driving home from the grocery store on E 14th and 98th. I stopped at the red light, and a guy in a black hoodie and mask got into my car through the passenger door. He had a gun and told me to give him my purse. I gave him my purse, which had my ID, ba…	my car	possessions	percentage of people in Oakland that own a car	5	[1, 2, 3, 4]	ChatGPT	Yes	No	Medium	0.65	0.833	Yes	https://my.vanderbilt.edu/greencities/files/2019/10/Vehicle-Ownership-in-U.S-2016.pdf	Feasible	In Oakland, car ownership rates are influenced by factors like urban density, public transportation availability, and income levels. Typically, car ownership in urban areas is lower than in suburban or rural areas due to the availability of public transportation options like BART (Bay Area Rapid Transit) and buses. However, many people still own cars, especially in neighborhoods less well-served …	Multiplication	Out

## Sheet: Ordering 2
Subreddit	Post	Disclosure (Ordering)	Disclosure Category	Query	ID	Conditionally Independent?	Source Used	Succeeded?	Reliable?	Annotator Confidence	Value	Ground Truth	Ground Truth Reliability	Ground Truth Source	Disclosure Type	ChatGPT Response	Operation	Parentheses
oakland	TITLE: Robbed at gunpoint while driving home from the grocery store in East Oakland last night. I'm still shaken. Last night around 9:30 pm, I was driving home from the grocery store on E 14th and 98th. I stopped at the red light, and a guy in a black hoodie and mask got into my car through the passenger door. He had a gun and told me to give him my purse. I gave him my purse, which had my ID, ba…	Oakland	location	population of Oakland	1	[]	ChatGPT	Yes	Yes	High	440000	436504	Yes	https://en.wikipedia.org/wiki/Oakland,_California	Feasible	The population of Oakland, California, is approximately 440,000 based on recent estimates. <answer>440000</answer> Confidence score: 0.95	Multiplication	Out
oakland	TITLE: Robbed at gunpoint while driving home from the grocery store in East Oakland last night. I'm still shaken. Last night around 9:30 pm, I was driving home from the grocery store on E 14th and 98th. I stopped at the red light, and a guy in a black hoodie and mask got into my car through the passenger door. He had a gun and told me to give him my purse. I gave him my purse, which had my ID, ba…	my purse	gender	percentage of people in Oakland that are women	2	[1]	ChatGPT	Yes	Yes	High	0.51	0.508	Yes	https://www.census.gov/quickfacts/fact/table/oaklandcitycalifornia/HEA775223	Feasible	The gender distribution in Oakland is fairly balanced, with women typically comprising around 50-51% of the population in many U.S. cities. Based on recent census data for Oakland, women make up about 51% of the population. <answer>51</answer> Confidence score: 0.95	Multiplication	Out
oakland	TITLE: Robbed at gunpoint while driving home from the grocery store in East Oakland last night. I'm still shaken. Last night around 9:30 pm, I was driving home from the grocery store on E 14th and 98th. I stopped at the red light, and a guy in a black hoodie and mask got into my car through the passenger door. He had a gun and told me to give him my purse. I gave him my purse, which had my ID, ba…	robbed at gunpoint	crime	percentage of people in Oakland in the past year that are victims of robbery	3	[1, 2]	ChatGPT	Yes	Yes	High	0.0041	0.008	Yes	https://www.cbsnews.com/sanfrancisco/news/oakland-crime-data-2023-complex-picture-property-crimes-homicides/	Feasible	To estimate the percentage of people in Oakland who were victims of robbery in the past year, I can look at recent crime statistics. Oakland has had a higher-than-average crime rate in the U.S., with robbery being a notable concern. Based on recent crime reports, Oakland had roughly 1,800 robberies reported in the last year. With a population of approximately 440,000, we can calculate the percent…	Multiplication	Out
oakland	TITLE: Robbed at gunpoint while driving home from the grocery store in East Oakland last night. I'm still shaken. Last night around 9:30 pm, I was driving home from the grocery store on E 14th and 98th. I stopped at the red light, and a guy in a black hoodie and mask got into my car through the passenger door. He had a gun and told me to give him my purse. I gave him my purse, which had my ID, ba…	my car	possessions	percentage of people in Oakland that own a car	4	[1, 2, 3]	ChatGPT	Yes	No	Medium	0.65	0.833	Yes	https://my.vanderbilt.edu/greencities/files/2019/10/Vehicle-Ownership-in-U.S-2016.pdf	Feasible	In Oakland, car ownership rates are influenced by factors like urban density, public transportation availability, and income levels. Typically, car ownership in urban areas is lower than in suburban or rural areas due to the availability of public transportation options like BART (Bay Area Rapid Transit) and buses. However, many people still own cars, especially in neighborhoods less well-served …	Multiplication	Out
