# Supplementary material
Source: ML conference proceedings conference paper supplement (https://openreview.net/forum?id=HMVQ00vabY)
Supplement: supplementary_material [file 4.xlsx]

## Sheet: Ordering 1
Subreddit	Post	Disclosure (Ordering)	Disclosure Category	Query	ID	Conditionally Independent?	Source Used	Succeeded?	Reliable?	Annotator Confidence	Value	Ground Truth	Ground Truth Reliability	Ground Truth Source	Disclosure Type	ChatGPT Response	Operation	Parentheses
oakland	TITLE: Oakland Housing Market Hi Everyone! I'm a CRNA making a good income (446k a year) and I'm looking to buy a house in Oakland. I've been browsing Zillow and Redfin and I'm a little overwhelmed. I've got my eye on some places in the Montclair and Piedmont areas but I'm not sure if they're worth the price tag. I've been looking at houses in the $1.2-1.5 million range and they seem to be going …	Oakland	location	Population of Oakland, CA	1	[]	ChatGPT	Yes	Yes	High	440000	436508	Yes	https://censusreporter.org/profiles/16000US0653000-oakland-ca/	Feasible	Oakland, CA, has an estimated population of around 440,000 based on recent census data trends. Confidence Score: 0.9 <answer>440000</answer>	Multiplication	Out
oakland	TITLE: Oakland Housing Market Hi Everyone! I'm a CRNA making a good income (446k a year) and I'm looking to buy a house in Oakland. I've been browsing Zillow and Redfin and I'm a little overwhelmed. I've got my eye on some places in the Montclair and Piedmont areas but I'm not sure if they're worth the price tag. I've been looking at houses in the $1.2-1.5 million range and they seem to be going …	I'm looking to buy a house in Oakland	location	Percentage of people in Oakland, CA, that moved within the previous year	2	[]	ChatGPT	Yes	Yes	High	0.18	0.121	Yes	https://censusreporter.org/profiles/16000US0653000-oakland-ca/#:~:text=*%20ACS%202022%205%2Dyear%20data,%2C%20CA%20Metro%20Area:%2011.6%25	Feasible	Historically, about 15-20% of people in urban areas like Oakland, CA, report moving within a given year. Confidence Score: 0.8 <answer>18</answer>	Multiplication	Out
oakland	TITLE: Oakland Housing Market Hi Everyone! I'm a CRNA making a good income (446k a year) and I'm looking to buy a house in Oakland. I've been browsing Zillow and Redfin and I'm a little overwhelmed. I've got my eye on some places in the Montclair and Piedmont areas but I'm not sure if they're worth the price tag. I've been looking at houses in the $1.2-1.5 million range and they seem to be going …	I'm a CRNA	occupation	Percentage of the US workforce that are CRNAs	3	[1,2]	ChatGPT	Yes	Yes	High	0.0005	0.0002	Yes	https://www.zippia.com/certified-registered-nurse-anesthetist-jobs/demographics/	Feasible	Certified Registered Nurse Anesthetists (CRNAs) make up approximately 0.05% of the U.S. workforce, as they represent a specialized subset within healthcare professionals. Confidence Score: 0.85 <answer>0.05</answer>	Multiplication	Out
oakland	TITLE: Oakland Housing Market Hi Everyone! I'm a CRNA making a good income (446k a year) and I'm looking to buy a house in Oakland. I've been browsing Zillow and Redfin and I'm a little overwhelmed. I've got my eye on some places in the Montclair and Piedmont areas but I'm not sure if they're worth the price tag. I've been looking at houses in the $1.2-1.5 million range and they seem to be going …	making a good income (446k a year)	finance	Percentage of CRNAs in the US that make over 400k per year	4	[1,2]	ChatGPT	Yes	No	Low	0.02	0.11	Yes	https://www.ziprecruiter.com/Salaries/Crna-Salary#Yearly	Feasible	The percentage of CRNAs in the U.S. making over $400,000 per year is very low, as most CRNAs earn between $150,000 and $250,000 annually. It is estimated that around 1-2% of CRNAs may exceed this income level, often through specialized roles, consulting, or multiple contracts. Confidence Score: 0.7 <answer>2</answer>	Multiplication	Out
oakland	TITLE: Oakland Housing Market Hi Everyone! I'm a CRNA making a good income (446k a year) and I'm looking to buy a house in Oakland. I've been browsing Zillow and Redfin and I'm a little overwhelmed. I've got my eye on some places in the Montclair and Piedmont areas but I'm not sure if they're worth the price tag. I've been looking at houses in the $1.2-1.5 million range and they seem to be going …	I'm looking to buy a house in Oakland	finance	Percentage of people in high-income brackets in the US who are homeowners	5	[1,2,3,4]	ChatGPT	Yes	Yes	High	0.85	0.81	Yes	https://www.minneapolisfed.org/article/2024/homeownership-among-lowest-income-households-climbs-near-all-time-high#:~:text=Still%2C%20lower%2Dincome%20households%20are,top%20income%20quintile%20were%20homeowners.	Feasible	**Thought Process**: Homeownership is significantly more common among people in high-income brackets in the U.S., as financial stability and resources facilitate property ownership. According to data from housing and income studies, approximately **75% to 90%** of individuals in high-income brackets own homes. A reasonable estimate is **85%**. **Confidence Score**: 0.85 <answer>85</answer>	Multiplication	Out

## Sheet: Ordering 2
Subreddit	Post	Disclosure (Ordering)	Disclosure Category	Query	ID	Conditionally Independent?	Source Used	Succeeded?	Reliable?	Annotator Confidence	Value	Ground Truth	Ground Truth Reliability	Ground Truth Source	Disclosure Type	ChatGPT Response	Operation	Parentheses
oakland	TITLE: Oakland Housing Market Hi Everyone! I'm a CRNA making a good income (446k a year) and I'm looking to buy a house in Oakland. I've been browsing Zillow and Redfin and I'm a little overwhelmed. I've got my eye on some places in the Montclair and Piedmont areas but I'm not sure if they're worth the price tag. I've been looking at houses in the $1.2-1.5 million range and they seem to be going …	some places in the Montclair and Piedmont areas	location	Population of the Montclair neighborhood in Oakland, CA	1	[]	ChatGPT	Yes	No	Medium	5000	6380	Yes	https://www.niche.com/places-to-live/n/montclair-oakland-ca/residents/	Feasible	The population of the Montclair neighborhood in Oakland, CA, is estimated to be around 5,000 residents. Confidence Score: 0.8 <answer>5000</answer>	Multiplication	Begin
oakland	TITLE: Oakland Housing Market Hi Everyone! I'm a CRNA making a good income (446k a year) and I'm looking to buy a house in Oakland. I've been browsing Zillow and Redfin and I'm a little overwhelmed. I've got my eye on some places in the Montclair and Piedmont areas but I'm not sure if they're worth the price tag. I've been looking at houses in the $1.2-1.5 million range and they seem to be going …	some places in the Montclair and Piedmont areas	location	Population of Piedmont, CA	2	[1]	ChatGPT	Yes	Yes	High	11000	10635	Yes	https://www.census.gov/quickfacts/fact/table/piedmontcitycalifornia/INC110222	Feasible	Piedmont, CA, has an estimated population of around 11,000 residents. Confidence Score: 0.9 <answer>11000</answer>	Addition	In
oakland	TITLE: Oakland Housing Market Hi Everyone! I'm a CRNA making a good income (446k a year) and I'm looking to buy a house in Oakland. I've been browsing Zillow and Redfin and I'm a little overwhelmed. I've got my eye on some places in the Montclair and Piedmont areas but I'm not sure if they're worth the price tag. I've been looking at houses in the $1.2-1.5 million range and they seem to be going …	I'm looking to buy a house in Oakland	location	Percentage of people in Oakland, CA, that moved within the previous year	3	[1,2]	ChatGPT	Yes	Yes	High	0.18	0.121	Yes	https://censusreporter.org/profiles/16000US0653000-oakland-ca/#:~:text=*%20ACS%202022%205%2Dyear%20data,%2C%20CA%20Metro%20Area:%2011.6%25	Feasible	Historically, about 15-20% of people in urban areas like Oakland, CA, report moving within a given year. Confidence Score: 0.8 <answer>18</answer>	Multiplication	Out
oakland	TITLE: Oakland Housing Market Hi Everyone! I'm a CRNA making a good income (446k a year) and I'm looking to buy a house in Oakland. I've been browsing Zillow and Redfin and I'm a little overwhelmed. I've got my eye on some places in the Montclair and Piedmont areas but I'm not sure if they're worth the price tag. I've been looking at houses in the $1.2-1.5 million range and they seem to be going …	I'm a CRNA	occupation	Percentage of the US workforce that are CRNAs	4	[1,2,3]	ChatGPT	Yes	Yes	High	0.0005	0.0002	Yes	https://www.zippia.com/certified-registered-nurse-anesthetist-jobs/demographics/	Feasible	Certified Registered Nurse Anesthetists (CRNAs) make up approximately 0.05% of the U.S. workforce, as they represent a specialized subset within healthcare professionals. Confidence Score: 0.85 <answer>0.05</answer>	Multiplication	Out
oakland	TITLE: Oakland Housing Market Hi Everyone! I'm a CRNA making a good income (446k a year) and I'm looking to buy a house in Oakland. I've been browsing Zillow and Redfin and I'm a little overwhelmed. I've got my eye on some places in the Montclair and Piedmont areas but I'm not sure if they're worth the price tag. I've been looking at houses in the $1.2-1.5 million range and they seem to be going …	making a good income (446k a year)	finance	Percentage of CRNAs in the US that make over 400k per year	5	[1,2,3]	ChatGPT	Yes	No	Low	0.02	0.11	Yes	https://www.ziprecruiter.com/Salaries/Crna-Salary#Yearly	Feasible	The percentage of CRNAs in the U.S. making over $400,000 per year is very low, as most CRNAs earn between $150,000 and $250,000 annually. It is estimated that around 1-2% of CRNAs may exceed this income level, often through specialized roles, consulting, or multiple contracts. Confidence Score: 0.7 <answer>2</answer>	Multiplication	Out
oakland	TITLE: Oakland Housing Market Hi Everyone! I'm a CRNA making a good income (446k a year) and I'm looking to buy a house in Oakland. I've been browsing Zillow and Redfin and I'm a little overwhelmed. I've got my eye on some places in the Montclair and Piedmont areas but I'm not sure if they're worth the price tag. I've been looking at houses in the $1.2-1.5 million range and they seem to be going …	I'm looking to buy a house in Oakland	finance	Percentage of people in high-income brackets in the US who are homeowners	6	[1, 2, 3, 4, 5]	ChatGPT	Yes	Yes	High	0.85	0.81	Yes	https://www.minneapolisfed.org/article/2024/homeownership-among-lowest-income-households-climbs-near-all-time-high#:~:text=Still%2C%20lower%2Dincome%20households%20are,top%20income%20quintile%20were%20homeowners.	Feasible	**Thought Process**: Homeownership is significantly more common among people in high-income brackets in the U.S., as financial stability and resources facilitate property ownership. According to data from housing and income studies, approximately **75% to 90%** of individuals in high-income brackets own homes. A reasonable estimate is **85%**. **Confidence Score**: 0.85 <answer>85</answer>	Multiplication	Out
