# Supplementary material
Source: ML conference proceedings conference paper supplement (https://openreview.net/forum?id=HMVQ00vabY)
Supplement: supplementary_material [file 5.xlsx]

## Sheet: Ordering 1
	Post	Disclosure (Ordering)	Disclosure Category	Query	ID	Conditionally Independent?	Source Used	Succeeded?	Reliable?	Annotator Confidence	Value	Ground Truth	Ground Truth Reliability	Ground Truth Source	Disclosure Type	ChatGPT Response	Operation	Parentheses
mentalhealth	TITLE: Trapped in an Abusive Marriage I (27F) am terrified of my husband. I'm currently in a domestic violence situation and I'm not sure how to get out. I've been in this relationship for 10 years and I've been married for 5. We have two kids together. He's always been the primary caregiver and I've always been the one to take care of everything in the household. I've been a stay-at-home mom for…	27F	age_gender	Number of women aged 25 to 29 in the US	1	[]	ChatGPT	Yes	Yes	High	11000000	10840000	Yes	https://www.statista.com/statistics/241488/population-of-the-us-by-sex-and-age/	Feasible	The estimated number of women aged 25 to 29 in the U.S. is around 11 million, based on recent demographic data. Confidence Score: 0.85 <answer>11000000</answer>	Multiplication	Begin
mentalhealth	TITLE: Trapped in an Abusive Marriage I (27F) am terrified of my husband. I'm currently in a domestic violence situation and I'm not sure how to get out. I've been in this relationship for 10 years and I've been married for 5. We have two kids together. He's always been the primary caregiver and I've always been the one to take care of everything in the household. I've been a stay-at-home mom for…	27F	age_gender	Number of years in the age range 25 to 29	2	[]	ChatGPT	Yes	Yes	High	5	5	Yes		Feasible	The age range 25 to 29 includes 5 years. Confidence Score: 1.0 <answer>5</answer>	(Division, 1)	In
mentalhealth	TITLE: Trapped in an Abusive Marriage I (27F) am terrified of my husband. I'm currently in a domestic violence situation and I'm not sure how to get out. I've been in this relationship for 10 years and I've been married for 5. We have two kids together. He's always been the primary caregiver and I've always been the one to take care of everything in the household. I've been a stay-at-home mom for…	my husband	relationship_status	Percentage of women aged 25 to 29 who are married	3	[]	ChatGPT	Yes	No	Low	0.45	0.32	Yes	https://www.bgsu.edu/ncfmr/resources/data/family-profiles/brown-manning-relationship-status-trends-age-gender-fp-21-25.html#:~:text=The%20share%20of%2018%2D24,%E2%80%93%2010%25%20to%208%25).	Feasible	Approximately 45% of women aged 25 to 29 in the U.S. are married, based on recent demographic trends. Confidence Score: 0.8 <answer>45</answer>	Multiplication	Out
mentalhealth	TITLE: Trapped in an Abusive Marriage I (27F) am terrified of my husband. I'm currently in a domestic violence situation and I'm not sure how to get out. I've been in this relationship for 10 years and I've been married for 5. We have two kids together. He's always been the primary caregiver and I've always been the one to take care of everything in the household. I've been a stay-at-home mom for…	I've been in this relationship for 10 years and I've been married for 5	relationship_status	Percentage of married individuals who wed in the past ten years	4	[1,2]	ChatGPT	Yes	Yes	High	0.23	0.28	Yes	https://www.bgsu.edu/ncfmr/resources/data/family-profiles/payne-median-duration-marriages-fp-20-16.html	Feasible	An estimated 20-25% of married individuals in the U.S. wed within the past ten years, based on recent marital trends and census data. Confidence Score: 0.8 <answer>23</answer>	Multiplication	Out
mentalhealth	TITLE: Trapped in an Abusive Marriage I (27F) am terrified of my husband. I'm currently in a domestic violence situation and I'm not sure how to get out. I've been in this relationship for 10 years and I've been married for 5. We have two kids together. He's always been the primary caregiver and I've always been the one to take care of everything in the household. I've been a stay-at-home mom for…	We have two kids together	family	Percentage of married individuals in the US who have children	5	[1,2,4]	ChatGPT	Yes	No	Low	0.72	0.85	Yes	https://usafacts.org/articles/how-has-the-structure-of-american-households-changed-over-time/#:~:text=The%20proportion%20of%20American%20households,increased%20with%20the%20country's%20population.	Feasible	Approximately 85% of married individuals in the U.S. have children, based on recent demographic data. Confidence Score: 0.8 <answer>85</answer>	Multiplication	Out
mentalhealth	TITLE: Trapped in an Abusive Marriage I (27F) am terrified of my husband. I'm currently in a domestic violence situation and I'm not sure how to get out. I've been in this relationship for 10 years and I've been married for 5. We have two kids together. He's always been the primary caregiver and I've always been the one to take care of everything in the household. I've been a stay-at-home mom for…	I've been a stay-at-home mom	occupation	Percentage of mothers in the US that are stay-at-home	6	[1,2,3,4]	ChatGPT	Yes	Yes	High	0.2	0.25	Yes	https://www.yahoo.com/tech/number-stay-home-mothers-rose-140800016.html#:~:text=Nearly%20a%20quarter%20of%20American,jobs%20over%20the%20past%20year.	Feasible	Approximately 20% of mothers in the U.S. are stay-at-home mothers, based on recent data trends. Confidence Score: 0.85 <answer>20</answer>	Multiplication	Out
mentalhealth	TITLE: Trapped in an Abusive Marriage I (27F) am terrified of my husband. I'm currently in a domestic violence situation and I'm not sure how to get out. I've been in this relationship for 10 years and I've been married for 5. We have two kids together. He's always been the primary caregiver and I've always been the one to take care of everything in the household. I've been a stay-at-home mom for…	I'm currently in a domestic violence situation	personal_experience	Percentage of women in the US that face domestic violence from an intimate partner	7	[1,2,3,4,5,6]	ChatGPT	Yes	Yes	High	0.25	0.22	Yes	https://ballardbrief.byu.edu/issue-briefs/domestic-violence-against-women-in-the-united-states	Feasible	Approximately 25% of women in the U.S. have faced domestic violence from an intimate partner, based on recent statistics. Confidence Score: 0.85 <answer>25</answer>	Multiplication	Out
mentalhealth	TITLE: Trapped in an Abusive Marriage I (27F) am terrified of my husband. I'm currently in a domestic violence situation and I'm not sure how to get out. I've been in this relationship for 10 years and I've been married for 5. We have two kids together. He's always been the primary caregiver and I've always been the one to take care of everything in the household. I've been a stay-at-home mom for…	I've been feeling like I'm walking on eggshells all the time	mental_health	Percentage of women in the US that face domestic violence from an intimate partner who experience anxiety	8	[1,2,3,4,5,6]	ChatGPT	Yes	No	Low	0.6	0.77	Yes	https://pmc.ncbi.nlm.nih.gov/articles/PMC3566605/#:~:text=4.1.&text=In%20the%20study%20on%20burden,13%2C%2040%2C%2050%5D.	Feasible	Approximately 60% of women who face domestic violence from an intimate partner experience anxiety as a consequence, based on research data linking intimate partner violence with mental health impacts. Confidence Score: 0.8 <answer>60</answer>	Multiplication	Out

## Sheet: Ordering 2
	Post	Disclosure (Ordering)	Disclosure Category	Query	ID	Conditionally Independent?	Source Used	Succeeded?	Reliable?	Annotator Confidence	Value	Ground Truth	Ground Truth Reliability	Ground Truth Source	Disclosure Type	ChatGPT Response	Operation	Parentheses
mentalhealth	TITLE: Trapped in an Abusive Marriage I (27F) am terrified of my husband. I'm currently in a domestic violence situation and I'm not sure how to get out. I've been in this relationship for 10 years and I've been married for 5. We have two kids together. He's always been the primary caregiver and I've always been the one to take care of everything in the household. I've been a stay-at-home mom for…	my husband	relationship_status	Number of married individuals in the US	1	[]	ChatGPT	Yes	Yes	High	132000000	133100000	Yes	https://www.census.gov/library/stories/2023/07/marriage-divorce-rates.html#:~:text=Stats%20for%20Stories,changing%20population%2C%20housing%20and%20workforce.	Feasible	The estimated number of married adults in the U.S. is around 132 million. Confidence Score: 0.85 <answer>132000000</answer>	Multiplication	Out
mentalhealth	TITLE: Trapped in an Abusive Marriage I (27F) am terrified of my husband. I'm currently in a domestic violence situation and I'm not sure how to get out. I've been in this relationship for 10 years and I've been married for 5. We have two kids together. He's always been the primary caregiver and I've always been the one to take care of everything in the household. I've been a stay-at-home mom for…	27F	age_gender	Mostly commonly identified number of genders	2	[]	ChatGPT	Yes	Yes	High	2	2	Yes		Feasible	The most commonly identified number of genders in various surveys and cultural contexts is 2 (male and female), though recognition of additional gender identities has grown in recent years. Confidence Score: 0.9 <answer>2</answer>	(Division, 1)	Begin
mentalhealth	TITLE: Trapped in an Abusive Marriage I (27F) am terrified of my husband. I'm currently in a domestic violence situation and I'm not sure how to get out. I've been in this relationship for 10 years and I've been married for 5. We have two kids together. He's always been the primary caregiver and I've always been the one to take care of everything in the household. I've been a stay-at-home mom for…	27F	age_gender	Percentage of US population aged 25 to 29	3	[1,2]	ChatGPT	Yes	Yes	High	0.07	0.0658	Yes	https://www.statista.com/statistics/241488/population-of-the-us-by-sex-and-age/	Feasible	The percentage of the U.S. population aged 25 to 29 is approximately 7%, based on recent demographic data. Confidence Score: 0.85 <answer>7</answer>	Multiplication	Begin
mentalhealth	TITLE: Trapped in an Abusive Marriage I (27F) am terrified of my husband. I'm currently in a domestic violence situation and I'm not sure how to get out. I've been in this relationship for 10 years and I've been married for 5. We have two kids together. He's always been the primary caregiver and I've always been the one to take care of everything in the household. I've been a stay-at-home mom for…	27F	age_gender	Number of years in the age range 25 to 29	4	[1,2]	ChatGPT	Yes	Yes	High	5	5	Yes		Feasible	The age range 25 to 29 includes 5 years. Confidence Score: 1.0 <answer>5</answer>	(Division, 1)	In
mentalhealth	TITLE: Trapped in an Abusive Marriage I (27F) am terrified of my husband. I'm currently in a domestic violence situation and I'm not sure how to get out. I've been in this relationship for 10 years and I've been married for 5. We have two kids together. He's always been the primary caregiver and I've always been the one to take care of everything in the household. I've been a stay-at-home mom for…	I've been in this relationship for 10 years and I've been married for 5	relationship_status	Percentage of married individuals who wed in the past ten years	5	[2,3,4]	ChatGPT	Yes	Yes	High	0.23	0.28	Yes	https://www.bgsu.edu/ncfmr/resources/data/family-profiles/payne-median-duration-marriages-fp-20-16.html	Feasible	An estimated 20-25% of married individuals in the U.S. wed within the past ten years, based on recent marital trends and census data. Confidence Score: 0.8 <answer>23</answer>	Multiplication	Out
mentalhealth	TITLE: Trapped in an Abusive Marriage I (27F) am terrified of my husband. I'm currently in a domestic violence situation and I'm not sure how to get out. I've been in this relationship for 10 years and I've been married for 5. We have two kids together. He's always been the primary caregiver and I've always been the one to take care of everything in the household. I've been a stay-at-home mom for…	We have two kids together	family	Percentage of married individuals in the US who have children	6	[2,3,4,5]	ChatGPT	Yes	No	Low	0.72	0.85	Yes	https://usafacts.org/articles/how-has-the-structure-of-american-households-changed-over-time/#:~:text=The%20proportion%20of%20American%20households,increased%20with%20the%20country's%20population.	Feasible	Approximately 85% of married individuals in the U.S. have children, based on recent demographic data. Confidence Score: 0.8 <answer>85</answer>	Multiplication	Out
mentalhealth	TITLE: Trapped in an Abusive Marriage I (27F) am terrified of my husband. I'm currently in a domestic violence situation and I'm not sure how to get out. I've been in this relationship for 10 years and I've been married for 5. We have two kids together. He's always been the primary caregiver and I've always been the one to take care of everything in the household. I've been a stay-at-home mom for…	I've been a stay-at-home mom	occupation	Percentage of mothers in the US that are stay-at-home	7	[1, 2, 3, 4, 5]	ChatGPT	Yes	Yes	High	0.2	0.25	Yes	https://www.yahoo.com/tech/number-stay-home-mothers-rose-140800016.html#:~:text=Nearly%20a%20quarter%20of%20American,jobs%20over%20the%20past%20year.	Feasible	Approximately 20% of mothers in the U.S. are stay-at-home mothers, based on recent data trends. Confidence Score: 0.85 <answer>20</answer>	Multiplication	Out
mentalhealth	TITLE: Trapped in an Abusive Marriage I (27F) am terrified of my husband. I'm currently in a domestic violence situation and I'm not sure how to get out. I've been in this relationship for 10 years and I've been married for 5. We have two kids together. He's always been the primary caregiver and I've always been the one to take care of everything in the household. I've been a stay-at-home mom for…	I'm currently in a domestic violence situation	personal_experience	Percentage of women in the US that face domestic violence from an intimate partner	8	[1, 2, 3, 4, 5, 6, 7]	ChatGPT	Yes	Yes	High	0.25	0.22	Yes	https://ballardbrief.byu.edu/issue-briefs/domestic-violence-against-women-in-the-united-states	Feasible	Approximately 25% of women in the U.S. have faced domestic violence from an intimate partner, based on recent statistics. Confidence Score: 0.85 <answer>25</answer>	Multiplication	Out
mentalhealth	TITLE: Trapped in an Abusive Marriage I (27F) am terrified of my husband. I'm currently in a domestic violence situation and I'm not sure how to get out. I've been in this relationship for 10 years and I've been married for 5. We have two kids together. He's always been the primary caregiver and I've always been the one to take care of everything in the household. I've been a stay-at-home mom for…	I've been feeling like I'm walking on eggshells all the time	mental_health	Percentage of women in the US that face domestic violence from an intimate partner who experience anxiety	9	[1, 2, 3, 4, 5, 6, 7]	ChatGPT	Yes	No	Low	0.6	0.77	Yes	https://pmc.ncbi.nlm.nih.gov/articles/PMC3566605/#:~:text=4.1.&text=In%20the%20study%20on%20burden,13%2C%2040%2C%2050%5D.	Feasible	Approximately 60% of women who face domestic violence from an intimate partner experience anxiety as a consequence, based on research data linking intimate partner violence with mental health impacts. Confidence Score: 0.8 <answer>60</answer>	Multiplication	Out
