# Supplementary material
Source: ML conference proceedings conference paper supplement (https://openreview.net/forum?id=HMVQ00vabY)
Supplement: supplementary_material [file 5.xlsx]

## Sheet: Ordering 1
Subreddit	Post	Disclosure (Ordering)	Disclosure Category	Query	ID	Conditionally Independent?	Source Used	Succeeded?	Reliable?	Annotator Confidence	Value	Ground Truth	Ground Truth Reliability	Ground Truth Source	Disclosure Type	ChatGPT Response	Operation	Parentheses
oakland	TITLE: Someone has tried stealing my car TWICE I've had my 2013 Hyundai for a while now and have been living in Oakland for ~5 years. So its been a great car but also a target for thieves. Someone has jammed the drivers side door with a screwdriver twice. The first time it still worked, the second time they ripped the door handle off, broke the cylinder. Had to get it worked out, and I'm worried …	living in Oakland	location	population of Oakland	1	[]	ChatGPT	Yes	Yes	High	440000	436504	Yes	https://en.wikipedia.org/wiki/Oakland,_California	Feasible	The population of Oakland, California, is approximately 440,000 based on recent estimates. <answer>440000</answer> Confidence score: 0.95	Multiplication	Out
oakland	TITLE: Someone has tried stealing my car TWICE I've had my 2013 Hyundai for a while now and have been living in Oakland for ~5 years. So its been a great car but also a target for thieves. Someone has jammed the drivers side door with a screwdriver twice. The first time it still worked, the second time they ripped the door handle off, broke the cylinder. Had to get it worked out, and I'm worried …	for ~5 years	time	percentage of people in Oakland that have been living in Oakland since 2017	2	[]	ChatGPT	Yes	No	High	0.4	0.28	Yes	https://censusreporter.org/profiles/16000US0653000-oakland-ca/	Feasible	To estimate the percentage of people in Oakland who have been living there since 2017 (approximately 7 years), we can rely on residential mobility data. In urban areas like Oakland, about 40-50% of the population typically remains in place over a 5- to 10-year period, depending on factors like housing costs, employment opportunities, and gentrification. Given Oakland's relatively high turnover ra…	Multiplication	Out
oakland	TITLE: Someone has tried stealing my car TWICE I've had my 2013 Hyundai for a while now and have been living in Oakland for ~5 years. So its been a great car but also a target for thieves. Someone has jammed the drivers side door with a screwdriver twice. The first time it still worked, the second time they ripped the door handle off, broke the cylinder. Had to get it worked out, and I'm worried …	my 2013 Hyundai	possessions	percentage of people in Oakland that own a car	3	[2]	ChatGPT	Yes	No	Medium	0.65	0.833	Yes	https://my.vanderbilt.edu/greencities/files/2019/10/Vehicle-Ownership-in-U.S-2016.pdf	Feasible	In Oakland, car ownership rates are influenced by factors like urban density, public transportation availability, and income levels. Typically, car ownership in urban areas is lower than in suburban or rural areas due to the availability of public transportation options like BART (Bay Area Rapid Transit) and buses. However, many people still own cars, especially in neighborhoods less well-served …	Multiplication	Out
oakland	TITLE: Someone has tried stealing my car TWICE I've had my 2013 Hyundai for a while now and have been living in Oakland for ~5 years. So its been a great car but also a target for thieves. Someone has jammed the drivers side door with a screwdriver twice. The first time it still worked, the second time they ripped the door handle off, broke the cylinder. Had to get it worked out, and I'm worried …	a great car but also a target for thieves	crime	percentage of people in Oakland that experience car theft	4	[2, 3]	ChatGPT	Yes	Yes	High	0.0227	0.0344	Yes	https://www.sfchronicle.com/crime/article/oakland-car-thefts-rising-18453221.php	Feasible	Oakland has one of the highest rates of car theft in the U.S. Recent data suggests that the city experiences around 10,000 car thefts annually. With a population of approximately 440,000, the percentage of people who experience car theft can be estimated as 2.27% <answer>2.27</answer> Confidence score: 0.9	Multiplication	Out
oakland	TITLE: Someone has tried stealing my car TWICE I've had my 2013 Hyundai for a while now and have been living in Oakland for ~5 years. So its been a great car but also a target for thieves. Someone has jammed the drivers side door with a screwdriver twice. The first time it still worked, the second time they ripped the door handle off, broke the cylinder. Had to get it worked out, and I'm worried …	someone has tried stealing my car twice	crime	percentage of victims of car theft in Oakland that experience car theft again	5	[2, 3]	ChatGPT	Yes	Yes	High	0.2	0.2	Yes	https://popcenter.asu.edu/content/analyzing-repeat-victimization	Feasible	Studies on repeat victimization for car theft indicate that people who have experienced a car theft are more likely to be targeted again. Nationwide, repeat car theft rates range between 10% and 25%, depending on location, prevention measures, and other factors. Given Oakland's high crime rates and patterns of repeat victimization, a reasonable estimate for repeat car theft in Oakland would be at…	Multiplication	Out
oakland	TITLE: Someone has tried stealing my car TWICE I've had my 2013 Hyundai for a while now and have been living in Oakland for ~5 years. So its been a great car but also a target for thieves. Someone has jammed the drivers side door with a screwdriver twice. The first time it still worked, the second time they ripped the door handle off, broke the cylinder. Had to get it worked out, and I'm worried …	my 2013 Hyundai	possessions	percentage of car theft victims in Oakland that own a Hyundai	6	[2, 3, 5]	ChatGPT	Yes	Yes	High	0.25	0.19	Yes	https://oaklandside.org/2024/05/28/oakland-kia-hyundai-owners-eligible-car-theft-lawsuit-settlement/	Feasible	Hyundai vehicles have been disproportionately targeted in car thefts due to a known vulnerability in certain models produced before 2022, which lack immobilizers. Nationwide trends indicate that in cities like Oakland, Hyundai and Kia models can account for a significant percentage of stolen cars, often between 20-30%. Assuming this trend holds in Oakland: An estimated 25% of car theft victims in…	Multiplication	Out

## Sheet: Ordering 2
Subreddit	Post	Disclosure (Ordering)	Disclosure Category	Query	ID	Conditionally Independent?	Source Used	Succeeded?	Reliable?	Annotator Confidence	Value	Ground Truth	Ground Truth Reliability	Ground Truth Source	Disclosure Type	ChatGPT Response	Operation	Parentheses
oakland	TITLE: Someone has tried stealing my car AGAIN I've had my 2013 Hyundai for a while now and have been living in Oakland for ~5 years. So its been a great car but also a target for thieves. Someone has jammed the drivers side door with a screwdriver twice. The first time it still worked, the second time they ripped the door handle off, broke the cylinder. Had to get it worked out, and now I'm worr…	living in Oakland	location	population of Oakland	1	[]	ChatGPT	Yes	Yes	High	440000	436504	Yes	https://en.wikipedia.org/wiki/Oakland,_California	Feasible	The population of Oakland, California, is approximately 440,000 based on recent estimates. <answer>440000</answer> Confidence score: 0.95	Multiplication	Out
oakland	TITLE: Someone has tried stealing my car AGAIN I've had my 2013 Hyundai for a while now and have been living in Oakland for ~5 years. So its been a great car but also a target for thieves. Someone has jammed the drivers side door with a screwdriver twice. The first time it still worked, the second time they ripped the door handle off, broke the cylinder. Had to get it worked out, and now I'm worr…	my 2013 Hyundai	possessions	percentage of people in Oakland that own a car	2	[]	ChatGPT	Yes	No	Medium	0.65	0.833	Yes	https://my.vanderbilt.edu/greencities/files/2019/10/Vehicle-Ownership-in-U.S-2016.pdf	Feasible	In Oakland, car ownership rates are influenced by factors like urban density, public transportation availability, and income levels. Typically, car ownership in urban areas is lower than in suburban or rural areas due to the availability of public transportation options like BART (Bay Area Rapid Transit) and buses. However, many people still own cars, especially in neighborhoods less well-served …	Multiplication	Out
oakland	TITLE: Someone has tried stealing my car AGAIN I've had my 2013 Hyundai for a while now and have been living in Oakland for ~5 years. So its been a great car but also a target for thieves. Someone has jammed the drivers side door with a screwdriver twice. The first time it still worked, the second time they ripped the door handle off, broke the cylinder. Had to get it worked out, and now I'm worr…	a great car but also a target for thieves	crime	percentage of people in Oakland that experience car theft	3	[2]	ChatGPT	Yes	Yes	High	0.0227	0.0344	Yes	https://www.sfchronicle.com/crime/article/oakland-car-thefts-rising-18453221.php	Feasible	Oakland has one of the highest rates of car theft in the U.S. Recent data suggests that the city experiences around 10,000 car thefts annually. With a population of approximately 440,000, the percentage of people who experience car theft can be estimated as 2.27% <answer>2.27</answer> Confidence score: 0.9	Multiplication	Out
oakland	TITLE: Someone has tried stealing my car AGAIN I've had my 2013 Hyundai for a while now and have been living in Oakland for ~5 years. So its been a great car but also a target for thieves. Someone has jammed the drivers side door with a screwdriver twice. The first time it still worked, the second time they ripped the door handle off, broke the cylinder. Had to get it worked out, and now I'm worr…	someone has tried stealing my car twice	crime	percentage of victims of car theft in Oakland that experience car theft again	4	[2]	ChatGPT	Yes	Yes	High	0.2	0.2	Yes	https://popcenter.asu.edu/content/analyzing-repeat-victimization	Feasible	Studies on repeat victimization for car theft indicate that people who have experienced a car theft are more likely to be targeted again. Nationwide, repeat car theft rates range between 10% and 25%, depending on location, prevention measures, and other factors. Given Oakland's high crime rates and patterns of repeat victimization, a reasonable estimate for repeat car theft in Oakland would be at…	Multiplication	Out
oakland	TITLE: Someone has tried stealing my car AGAIN I've had my 2013 Hyundai for a while now and have been living in Oakland for ~5 years. So its been a great car but also a target for thieves. Someone has jammed the drivers side door with a screwdriver twice. The first time it still worked, the second time they ripped the door handle off, broke the cylinder. Had to get it worked out, and now I'm worr…	my 2013 Hyundai	possessions	percentage of car theft victims in Oakland that own a Hyundai	5	[2, 4]	ChatGPT	Yes	No	Medium	0.25	0.19	Yes	https://oaklandside.org/2024/05/28/oakland-kia-hyundai-owners-eligible-car-theft-lawsuit-settlement/	Feasible	Hyundai vehicles have been disproportionately targeted in car thefts due to a known vulnerability in certain models produced before 2022, which lack immobilizers. Nationwide trends indicate that in cities like Oakland, Hyundai and Kia models can account for a significant percentage of stolen cars, often between 20-30%. Assuming this trend holds in Oakland: An estimated 25% of car theft victims in…	Multiplication	Out
