# Supplementary material
Source: ML conference proceedings conference paper supplement (https://openreview.net/forum?id=HMVQ00vabY)
Supplement: supplementary_material [file 6.xlsx]

## Sheet: Ordering 1
Subreddit	Post	Disclosure (Ordering)	Disclosure Category	Query	ID	Conditionally Independent?	Source Used	Succeeded?	Reliable?	Annotator Confidence	Value	Ground Truth	Ground Truth Reliability	Ground Truth Source	Disclosure Type	ChatGPT Response	Operation	Parentheses
mentalhealth	TITLE: still trying to process the trauma of being date raped by a stranger 2 years ago I was in my 2nd year of college and I was at a party with my friends. I remember meeting this guy, he was charming and seemed really into me. We ended up going back to his place to hook up, but things took a turn when he started getting really aggressive and wouldn't stop even when I told him no. I was in shoc…	the trauma of being date raped	personal_experience	Number of people that are raped in the US in a single year	1	[]	ChatGPT	Yes	No	Medium	460000	531807	Yes	https://www.statista.com/statistics/251923/usa-reported-forcible-rape-cases-by-gender/	Feasible	Approximately 460,000 people are estimated to be victims of rape in the U.S. in a single year, based on recent crime and health survey data. Confidence Score: 0.8 <answer>460000</answer>	Multiplication	Out
mentalhealth	TITLE: still trying to process the trauma of being date raped by a stranger 2 years ago I was in my 2nd year of college and I was at a party with my friends. I remember meeting this guy, he was charming and seemed really into me. We ended up going back to his place to hook up, but things took a turn when he started getting really aggressive and wouldn't stop even when I told him no. I was in shoc…	I remember meeting this guy	gender	Percentage of rape victims in the US in a single year that are female	2	[]	ChatGPT	Yes	Yes	High	0.9	0.8325	Yes	https://www.statista.com/statistics/251923/usa-reported-forcible-rape-cases-by-gender/	Feasible	Approximately 90% of rape victims in the U.S. in a single year are female, based on recent crime and victimization statistics. Confidence Score: 0.9 <answer>90</answer>	Multiplication	Out
mentalhealth	TITLE: still trying to process the trauma of being date raped by a stranger 2 years ago I was in my 2nd year of college and I was at a party with my friends. I remember meeting this guy, he was charming and seemed really into me. We ended up going back to his place to hook up, but things took a turn when he started getting really aggressive and wouldn't stop even when I told him no. I was in shoc…	I was in my 2nd year of college	education	Percentage of rape victims in the US in a single year that are ages 18-34	3	[2]	ChatGPT	Yes	Yes	High	0.54	0.54	Yes	https://rainn.org/statistics/victims-sexual-violence	Feasible	Approximately 54% of rape victims in the U.S. in a single year are between the ages of 18-34, according to recent data on victim demographics. Confidence Score: 0.85 <answer>54</answer>	Multiplication	Out
mentalhealth	TITLE: still trying to process the trauma of being date raped by a stranger 2 years ago I was in my 2nd year of college and I was at a party with my friends. I remember meeting this guy, he was charming and seemed really into me. We ended up going back to his place to hook up, but things took a turn when he started getting really aggressive and wouldn't stop even when I told him no. I was in shoc…	I've been struggling with anxiety and depression	mental_health	Percentage of rape victims in the US in a single year that experience depression	4	[2,3]	ChatGPT	Yes	Yes	High	0.33	0.3	Yes	https://mainweb-v.musc.edu/vawprevention/research/mentalimpact.shtml	Feasible	Approximately 33% of rape victims in the U.S. experience depression in the aftermath, based on mental health impact studies. Confidence Score: 0.85 <answer>33</answer>	Multiplication	Out
mentalhealth	TITLE: still trying to process the trauma of being date raped by a stranger 2 years ago I was in my 2nd year of college and I was at a party with my friends. I remember meeting this guy, he was charming and seemed really into me. We ended up going back to his place to hook up, but things took a turn when he started getting really aggressive and wouldn't stop even when I told him no. I was in shoc…	I've been struggling with anxiety and depression	mental_health	Percentage of rape victims in the US in a single year that experience anxiety	5	[2,3,4]	ChatGPT	Yes	No	Low	0.4	0.7	Yes	https://rainn.org/statistics/victims-sexual-violence	Feasible	Approximately 40% of rape victims in the U.S. experience anxiety following the incident, based on mental health studies on the impact of sexual assault. Confidence Score: 0.85 <answer>40</answer>	Multiplication	Out
mentalhealth	TITLE: still trying to process the trauma of being date raped by a stranger 2 years ago I was in my 2nd year of college and I was at a party with my friends. I remember meeting this guy, he was charming and seemed really into me. We ended up going back to his place to hook up, but things took a turn when he started getting really aggressive and wouldn't stop even when I told him no. I was in shoc…	I've had nightmares and flashbacks	mental_health	Percentage of rape victims in the US in a single year that report sleep disturbances	6	[2,3,4,5]	ChatGPT	Yes	No	Medium	0.5	0.77	Yes	https://pubmed.ncbi.nlm.nih.gov/11776415/#:~:text=Abstract,be%20associated%20with%20this%20complexity.	Feasible	Approximately 50% of rape victims in the U.S. report experiencing sleep disturbances following the incident, based on mental health impact studies. Confidence Score: 0.85 <answer>50</answer>	Multiplication	Out

## Sheet: Ordering 2
Subreddit	Post	Disclosure (Ordering)	Disclosure Category	Query	ID	Conditionally Independent?	Source Used	Succeeded?	Reliable?	Annotator Confidence	Value	Ground Truth	Ground Truth Reliability	Ground Truth Source	Disclosure Type	ChatGPT Response	Operation	Parentheses
mentalhealth	TITLE: still trying to process the trauma of being date raped by a stranger 2 years ago I was in my 2nd year of college and I was at a party with my friends. I remember meeting this guy, he was charming and seemed really into me. We ended up going back to his place to hook up, but things took a turn when he started getting really aggressive and wouldn't stop even when I told him no. I was in shoc…	I was in my 2nd year of college	education	Number of undergraduate college students in the US	1	[]	ChatGPT	Yes	Yes	High	16000000	15400000	Yes	https://nces.ed.gov/programs/coe/indicator/cha/undergrad-enrollment	Feasible	The estimated number of undergraduate college students in the U.S. is around 16 million. Confidence Score: 0.9 <answer>16000000</answer>	Multiplication	Begin
mentalhealth	TITLE: still trying to process the trauma of being date raped by a stranger 2 years ago I was in my 2nd year of college and I was at a party with my friends. I remember meeting this guy, he was charming and seemed really into me. We ended up going back to his place to hook up, but things took a turn when he started getting really aggressive and wouldn't stop even when I told him no. I was in shoc…	I was in my 2nd year of college	education	Number of undergraduate class levels	2	[]	ChatGPT	Yes	Yes	High	4	4	Yes		Feasible	There are typically 4 undergraduate class levels: freshman, sophomore, junior, and senior. Confidence Score: 1.0 <answer>4</answer>	(Division, 1)	In
mentalhealth	TITLE: still trying to process the trauma of being date raped by a stranger 2 years ago I was in my 2nd year of college and I was at a party with my friends. I remember meeting this guy, he was charming and seemed really into me. We ended up going back to his place to hook up, but things took a turn when he started getting really aggressive and wouldn't stop even when I told him no. I was in shoc…	the trauma of being date raped	personal_experience	Percentage of undergraduate college students in the US that are rape victims	3	[]	ChatGPT	Yes	Yes	High	0.11	0.166	Yes	https://rainn.org/statistics/campus-sexual-violence	Feasible	Approximately 11% of undergraduate college students in the U.S. report having experienced rape or sexual assault, based on surveys and research on campus safety and victimization. Confidence Score: 0.85 <answer>11</answer>	Multiplication	Out
mentalhealth	TITLE: still trying to process the trauma of being date raped by a stranger 2 years ago I was in my 2nd year of college and I was at a party with my friends. I remember meeting this guy, he was charming and seemed really into me. We ended up going back to his place to hook up, but things took a turn when he started getting really aggressive and wouldn't stop even when I told him no. I was in shoc…	I remember meeting this guy	gender	Percentage of rape victims in the US in a single year that are female	4	[1,2]	ChatGPT	Yes	Yes	High	0.9	0.8325	Yes	https://www.statista.com/statistics/251923/usa-reported-forcible-rape-cases-by-gender/	Feasible	Approximately 90% of rape victims in the U.S. in a single year are female, based on recent crime and victimization statistics. Confidence Score: 0.9 <answer>90</answer>	Multiplication	Out
mentalhealth	TITLE: still trying to process the trauma of being date raped by a stranger 2 years ago I was in my 2nd year of college and I was at a party with my friends. I remember meeting this guy, he was charming and seemed really into me. We ended up going back to his place to hook up, but things took a turn when he started getting really aggressive and wouldn't stop even when I told him no. I was in shoc…	I've been struggling with anxiety and depression	mental_health	Percentage of rape victims in the US in a single year that experience depression	5	[1,2,4]	ChatGPT	Yes	Yes	High	0.33	0.3	Yes	https://mainweb-v.musc.edu/vawprevention/research/mentalimpact.shtml	Feasible	Approximately 33% of rape victims in the U.S. experience depression in the aftermath, based on mental health impact studies. Confidence Score: 0.85 <answer>33</answer>	Multiplication	Out
mentalhealth	TITLE: still trying to process the trauma of being date raped by a stranger 2 years ago I was in my 2nd year of college and I was at a party with my friends. I remember meeting this guy, he was charming and seemed really into me. We ended up going back to his place to hook up, but things took a turn when he started getting really aggressive and wouldn't stop even when I told him no. I was in shoc…	I've been struggling with anxiety and depression	mental_health	Percentage of rape victims in the US in a single year that experience anxiety	6	[1,2,4,5]	ChatGPT	Yes	No	Low	0.4	0.7	Yes	https://rainn.org/statistics/victims-sexual-violence	Feasible	Approximately 40% of rape victims in the U.S. experience anxiety following the incident, based on mental health studies on the impact of sexual assault. Confidence Score: 0.85 <answer>40</answer>	Multiplication	Out
mentalhealth	TITLE: still trying to process the trauma of being date raped by a stranger 2 years ago I was in my 2nd year of college and I was at a party with my friends. I remember meeting this guy, he was charming and seemed really into me. We ended up going back to his place to hook up, but things took a turn when he started getting really aggressive and wouldn't stop even when I told him no. I was in shoc…	I've had nightmares and flashbacks	mental_health	Percentage of rape victims in the US in a single year that report sleep disturbances	7	[1,2,4,5,6]	ChatGPT	Yes	No	Medium	0.5	0.77	Yes	https://pubmed.ncbi.nlm.nih.gov/11776415/#:~:text=Abstract,be%20associated%20with%20this%20complexity.	Feasible	Approximately 50% of rape victims in the U.S. report experiencing sleep disturbances following the incident, based on mental health impact studies. Confidence Score: 0.85 <answer>50</answer>	Multiplication	Out
