# Supplementary material
Source: ML conference proceedings conference paper supplement (https://openreview.net/forum?id=HMVQ00vabY)
Supplement: supplementary_material [file 6.xlsx]

## Sheet: Ordering 1
Subreddit	Post	Disclosure (Ordering)	Disclosure Category	Query	ID	Conditionally Independent?	Source Used	Succeeded?	Reliable?	Annotator Confidence	Value	Ground Truth	Ground Truth Reliability	Ground Truth Source	Disclosure Type	ChatGPT Response	Operation	Parentheses
oakland	TITLE: Street Harassment around Lake Merritt Hey Oakland, I’m a late 20s woman who has been living in the city for 5 years and frankly I’m getting really fed up with all of the street harassment I’ve been getting. I like to walk the lake to clear my head but lately I’ve started getting more creepy dudes catcalling me and yelling at me in totally inappropriate ways (it’s happened to me multiple ti…	Oakland	location	population of Oakland	1	[]	ChatGPT	Yes	Yes	High	440000	440646	Yes	https://en.wikipedia.org/wiki/Oakland,_California	Feasible	The population of Oakland, California, is approximately 440,000 based on recent estimates. <answer>440000</answer> Confidence score: 0.95	Multiplication	Out
oakland	TITLE: Street Harassment around Lake Merritt Hey Oakland, I’m a late 20s woman who has been living in the city for 5 years and frankly I’m getting really fed up with all of the street harassment I’ve been getting. I like to walk the lake to clear my head but lately I’ve started getting more creepy dudes catcalling me and yelling at me in totally inappropriate ways (it’s happened to me multiple ti…	late 20s	age	percentage of people in Oakland that are in their late 20s	2	[]	ChatGPT	Yes	Yes	High	0.08	0.087	Yes	https://data.census.gov/table/ACSST1Y2023.S0101?g=160XX00US0653000	Feasible	In urban areas like Oakland, people in their late 20s (ages 25–29) typically constitute a significant portion of the population due to factors like job opportunities and urban living preferences. Census data suggests that about 7-10% of the population in such cities falls within this age group. A reasonable estimate for Oakland is: <answer>8</answer> Confidence score: 0.9	Multiplication	Out
oakland	TITLE: Street Harassment around Lake Merritt Hey Oakland, I’m a late 20s woman who has been living in the city for 5 years and frankly I’m getting really fed up with all of the street harassment I’ve been getting. I like to walk the lake to clear my head but lately I’ve started getting more creepy dudes catcalling me and yelling at me in totally inappropriate ways (it’s happened to me multiple ti…	woman	gender	percentage of people in Oakland in their late 20s that are women	3	[]	ChatGPT	Yes	Yes	High	0.5	0.5312	Yes	https://data.census.gov/table/ACSST1Y2023.S0101?g=160XX00US0653000	Feasible	In Oakland, as in most urban areas, the gender distribution tends to be fairly balanced. For individuals in their late 20s (ages 25–29), women typically make up around 50% of the population, although this can vary slightly by specific age group. Given this balance, a reasonable estimate is: <answer>50</answer> Confidence score: 0.95	Multiplication	Out
oakland	TITLE: Street Harassment around Lake Merritt Hey Oakland, I’m a late 20s woman who has been living in the city for 5 years and frankly I’m getting really fed up with all of the street harassment I’ve been getting. I like to walk the lake to clear my head but lately I’ve started getting more creepy dudes catcalling me and yelling at me in totally inappropriate ways (it’s happened to me multiple ti…	living in the city for 5 years	location	percentage of people in Oakland that moved to the city in the past 5 years	4	[2, 3]	ChatGPT	Yes	No	Medium	0.18	0.28	Yes	https://censusreporter.org/profiles/16000US0653000-oakland-ca/	Feasible	Recent data on residential mobility indicates that, on average, about 15-20% of people in large urban areas like Oakland move to the city within a five-year period. Oakland, with its relatively high turnover rate due to factors like housing costs and gentrification, likely falls toward the higher end of that range. A reasonable estimate is: <answer>18</answer> Confidence score: 0.8	Multiplication	Out
oakland	TITLE: Street Harassment around Lake Merritt Hey Oakland, I’m a late 20s woman who has been living in the city for 5 years and frankly I’m getting really fed up with all of the street harassment I’ve been getting. I like to walk the lake to clear my head but lately I’ve started getting more creepy dudes catcalling me and yelling at me in totally inappropriate ways (it’s happened to me multiple ti…	all the street harassment I've been getting	personal_experience	percentage of women in cities that experience street harassment multiple times	5	[1, 2, 4]	ChatGPT	Yes	No	High	0.5	0.73	Yes	https://news.tulane.edu/pr/rates-sexual-harassment-and-assault-nationwide-still-high-after-metoo-movement#:~:text=These%20abuses%20often%20occur%20as,%2C%20stores%2C%20buses%20or%20subways.	Feasible	Street harassment is a recurrent issue for many women in urban areas. Studies have shown that a significant portion of women who experience street harassment report it happening multiple times, with estimates ranging from 40% to 60%. This recurrence is influenced by factors like the frequency of outdoor activity and the safety culture in the city. A reasonable estimate is: <answer>50</answer> Con…	Multiplication	Out

## Sheet: Ordering 2
Subreddit	Post	Disclosure (Ordering)	Disclosure Category	Query	ID	Conditionally Independent?	Source Used	Succeeded?	Reliable?	Annotator Confidence	Value	Ground Truth	Ground Truth Reliability	Ground Truth Source	Disclosure Type	ChatGPT Response	Operation	Parentheses
oakland	TITLE: Street Harassment around Lake Merritt Hey Oakland, I’m a late 20s woman who has been living in the city for 5 years and frankly I’m getting really fed up with all of the street harassment I’ve been getting. I like to walk the lake to clear my head but lately I’ve started getting more creepy dudes catcalling me and yelling at me in totally inappropriate ways (it’s happened to me multiple ti…	oakland, around the Lakeshore & 18th intersection and Park Blvd	location	population of Lakeshore, Oakland	1	[]	ChatGPT	Yes	No	Low	12000	32404	Yes	https://www.point2homes.com/US/Neighborhood/CA/Oakland/Lakeshore-Demographics.html	Feasible	Lakeshore is a neighborhood located in the eastern part of Oakland, California, near Lake Merritt. While there isn't a precise population figure for the specific Lakeshore area alone, the population of the entire surrounding area (East Oakland) is estimated at around 154,000 people. Lakeshore itself is a smaller, more residential area within that broader population, with estimates suggesting it h…	Multiplication	Out
oakland	TITLE: Street Harassment around Lake Merritt Hey Oakland, I’m a late 20s woman who has been living in the city for 5 years and frankly I’m getting really fed up with all of the street harassment I’ve been getting. I like to walk the lake to clear my head but lately I’ve started getting more creepy dudes catcalling me and yelling at me in totally inappropriate ways (it’s happened to me multiple ti…	late 20s	age	percentage of people in Oakland that are in their late 20s	2	[1]	ChatGPT	Yes	Yes	High	0.08	0.087	Yes	https://data.census.gov/table/ACSST1Y2023.S0101?g=160XX00US0653000	Feasible	In urban areas like Oakland, people in their late 20s (ages 25–29) typically constitute a significant portion of the population due to factors like job opportunities and urban living preferences. Census data suggests that about 7-10% of the population in such cities falls within this age group. A reasonable estimate for Oakland is: <answer>8</answer> Confidence score: 0.9	Multiplication	Out
oakland	TITLE: Street Harassment around Lake Merritt Hey Oakland, I’m a late 20s woman who has been living in the city for 5 years and frankly I’m getting really fed up with all of the street harassment I’ve been getting. I like to walk the lake to clear my head but lately I’ve started getting more creepy dudes catcalling me and yelling at me in totally inappropriate ways (it’s happened to me multiple ti…	woman	gender	percentage of people in Oakland in their late 20s that are women	3	[1]	ChatGPT	Yes	Yes	High	0.5	0.5312	Yes	https://data.census.gov/table/ACSST1Y2023.S0101?g=160XX00US0653000	Feasible	In Oakland, as in most urban areas, the gender distribution tends to be fairly balanced. For individuals in their late 20s (ages 25–29), women typically make up around 50% of the population, although this can vary slightly by specific age group. Given this balance, a reasonable estimate is: <answer>50</answer> Confidence score: 0.95	Multiplication	Out
oakland	TITLE: Street Harassment around Lake Merritt Hey Oakland, I’m a late 20s woman who has been living in the city for 5 years and frankly I’m getting really fed up with all of the street harassment I’ve been getting. I like to walk the lake to clear my head but lately I’ve started getting more creepy dudes catcalling me and yelling at me in totally inappropriate ways (it’s happened to me multiple ti…	living in the city for 5 years	location	percentage of people in Oakland that moved to the city in the past 5 years	4	[1, 2, 3]	ChatGPT	Yes	No	Medium	0.18	0.28	Yes	https://censusreporter.org/profiles/16000US0653000-oakland-ca/	Feasible	Recent data on residential mobility indicates that, on average, about 15-20% of people in large urban areas like Oakland move to the city within a five-year period. Oakland, with its relatively high turnover rate due to factors like housing costs and gentrification, likely falls toward the higher end of that range. A reasonable estimate is: <answer>18</answer> Confidence score: 0.8	Multiplication	Out
oakland	TITLE: Street Harassment around Lake Merritt Hey Oakland, I’m a late 20s woman who has been living in the city for 5 years and frankly I’m getting really fed up with all of the street harassment I’ve been getting. I like to walk the lake to clear my head but lately I’ve started getting more creepy dudes catcalling me and yelling at me in totally inappropriate ways (it’s happened to me multiple ti…	all the street harassment I've been getting	personal_experience	percentage of women in cities that experience street harassment multiple times	5	[1, 2, 4]	ChatGPT	Yes	No	High	0.5	0.73	Yes	https://news.tulane.edu/pr/rates-sexual-harassment-and-assault-nationwide-still-high-after-metoo-movement#:~:text=These%20abuses%20often%20occur%20as,%2C%20stores%2C%20buses%20or%20subways.	Feasible	Street harassment is a recurrent issue for many women in urban areas. Studies have shown that a significant portion of women who experience street harassment report it happening multiple times, with estimates ranging from 40% to 60%. This recurrence is influenced by factors like the frequency of outdoor activity and the safety culture in the city. A reasonable estimate is: <answer>50</answer> Con…	Multiplication	Out
