# Supplementary material
Source: ML conference proceedings conference paper supplement (https://openreview.net/forum?id=HMVQ00vabY)
Supplement: supplementary_material [file 7.xlsx]

## Sheet: Ordering 1
Subreddit	Post	Disclosure (Ordering)	Disclosure Category	Query	ID	Conditionally Independent?	Source Used	Succeeded?	Reliable?	Annotator Confidence	Value	Ground Truth	Ground Truth Reliability	Ground Truth Source	Disclosure Type	ChatGPT Response	Operation	Parentheses
mentalhealth	TITLE: i was in school last month when a shooting happened I (16F) experienced a shooting at school last month. I'm still trying to process everything. I'm sitting here with my trauma rearing its head, and I'm not sure how to deal with it. I feel like I'm just going to be stuck in this constant state of fear and anxiety for the rest of my life. I keep replaying the sounds of the shots and the scr…	I (16F) was in school	education	number of people in the US in high school	1	[]	ChatGPT	Yes	Yes	High	16000000	16900000	Yes	https://www.statista.com/statistics/183996/us-high-school-enrollment-in-public-and-private-institutions/	Feasible	As of recent estimates, there are approximately 16 million high school students in the United States, considering that high school typically includes grades 9–12 and each grade level averages about 4 million students. <answer>16000000</answer> Confidence score: 0.95	Multiplication	Out
mentalhealth	TITLE: i was in school last month when a shooting happened I (16F) experienced a shooting at school last month. I'm still trying to process everything. I'm sitting here with my trauma rearing its head, and I'm not sure how to deal with it. I feel like I'm just going to be stuck in this constant state of fear and anxiety for the rest of my life. I keep replaying the sounds of the shots and the scr…	16F	age_gender	percentage of high schoolers that are 16 year-old females	2	[]	ChatGPT	Yes	Yes	High	0.125	0.1225	Yes	https://actforyouth.net/adolescence/demographics/#:~:text=Gender,by%20demographic%20characteristics%20%5B3%5D.	Feasible	High school in the U.S. typically includes students aged 14-18, with each age group making up about 25% of the total high school population. Within this group, females generally account for about half of the students. Thus, 16-year-old females represent approximately: Percentage=25%×50%=12.5% <answer>12.5</answer> Confidence score: 0.9	Multiplication	Out
mentalhealth	TITLE: i was in school last month when a shooting happened I (16F) experienced a shooting at school last month. I'm still trying to process everything. I'm sitting here with my trauma rearing its head, and I'm not sure how to deal with it. I feel like I'm just going to be stuck in this constant state of fear and anxiety for the rest of my life. I keep replaying the sounds of the shots and the scr…	during a school shooting	crime	percentage of students that experience a school shooting	3	[2]	ChatGPT	Yes	Yes	High	0.001	0.0026	Yes	https://www.sandyhookpromise.org/blog/gun-violence/facts-about-gun-violence-and-school-shootings/#:~:text=1.,8.	Feasible	School shootings, while devastating, remain statistically rare. According to available data, there are approximately 130,000 K-12 schools in the U.S., and fewer than 0.01% of schools experience a shooting annually. Given there are about 50 million K-12 students in the U.S., the percentage of students who directly experience a school shooting annually is: Percentage=(Students Directly Affected by …	Multiplication	Out
mentalhealth	TITLE: i was in school last month when a shooting happened I (16F) experienced a shooting at school last month. I'm still trying to process everything. I'm sitting here with my trauma rearing its head, and I'm not sure how to deal with it. I feel like I'm just going to be stuck in this constant state of fear and anxiety for the rest of my life. I keep replaying the sounds of the shots and the scr…	constant state of fear and anxiety for the rest of my life	mental_health	percentage of school shooting survivors that experience severe PTSD	4	[1, 2]	ChatGPT	Yes	Yes	High	0.3	0.28	Yes	https://www.apa.org/monitor/2018/09/survivors	Feasible	Research indicates that exposure to traumatic events, like school shootings, can result in significant psychological impacts. Among survivors, rates of severe PTSD vary but are typically estimated between 25-35%, depending on factors such as proximity to the event, the level of exposure, and available support systems. A reasonable estimate is: <answer>30</answer> Confidence score: 0.85	Multiplication	Out

## Sheet: Ordering 2
Subreddit	Post	Disclosure (Ordering)	Disclosure Category	Query	ID	Conditionally Independent?	Source Used	Succeeded?	Reliable?	Annotator Confidence	Value	Ground Truth	Ground Truth Reliability	Ground Truth Source	Disclosure Type	ChatGPT Response	Operation	Parentheses
mentalhealth	TITLE: i was in school last month when a shooting happened I (16F) experienced a shooting at school last month. I'm still trying to process everything. I'm sitting here with my trauma rearing its head, and I'm not sure how to deal with it. I feel like I'm just going to be stuck in this constant state of fear and anxiety for the rest of my life. I keep replaying the sounds of the shots and the scr…	16F	age_gender	number of people that are 16 year old females in the US	1	[]	ChatGPT	Yes	Yes	Low	3064286	2156000	Yes	https://www.statista.com/statistics/241488/population-of-the-us-by-sex-and-age/	Feasible	The U.S. population is approximately 330 million, and about 13% are teenagers aged 13–19, meaning there are roughly 330,000,000×0.13=42,900,000 teenagers. Each year of age represents about one-seventh of this group, so the number of 16-year-olds is approximately: 42,900,000÷7≈6,128,571 Assuming females make up about 50% of this age group: 6,128,571×0.5≈3,064,286 <answer>3064286</answer> Confidenc…	Multiplication	Out
mentalhealth	TITLE: i was in school last month when a shooting happened I (16F) experienced a shooting at school last month. I'm still trying to process everything. I'm sitting here with my trauma rearing its head, and I'm not sure how to deal with it. I feel like I'm just going to be stuck in this constant state of fear and anxiety for the rest of my life. I keep replaying the sounds of the shots and the scr…	was in school	education	percentage of 16 year olds that are enrolled in school	2	[1]	ChatGPT	Yes	Yes	High	0.95	0.947	Yes	https://nces.ed.gov/fastfacts/display.asp?id=16#:~:text=Question:,ages%20of%2016%20and%2024.&text=The%20overall%20status%20dropout%20rate,to%205.3%20percent%20in%202022.&text=Hover%2C%20click%2C%20and%20tap%20to,all%20figures%20on%20this%20page.	Feasible	In the United States, the vast majority of 16-year-olds are enrolled in school, as this age typically corresponds to being in high school (grades 10 or 11). According to recent data, about 94-96% of 16-year-olds are enrolled in school. A reasonable estimate is: <answer>95</answer> Confidence score: 0.95	Multiplication	Out
mentalhealth	TITLE: i was in school last month when a shooting happened I (16F) experienced a shooting at school last month. I'm still trying to process everything. I'm sitting here with my trauma rearing its head, and I'm not sure how to deal with it. I feel like I'm just going to be stuck in this constant state of fear and anxiety for the rest of my life. I keep replaying the sounds of the shots and the scr…	during a school shooting	crime	percentage of students that experience a school shooting	3	[1]	ChatGPT	Yes	Yes	High	0.001	0.0026	Yes	https://www.sandyhookpromise.org/blog/gun-violence/facts-about-gun-violence-and-school-shootings/#:~:text=1.,8.	Feasible	School shootings, while devastating, remain statistically rare. According to available data, there are approximately 130,000 K-12 schools in the U.S., and fewer than 0.01% of schools experience a shooting annually. Given there are about 50 million K-12 students in the U.S., the percentage of students who directly experience a school shooting annually is: Percentage=(Students Directly Affected by …	Multiplication	Out
mentalhealth	TITLE: i was in school last month when a shooting happened I (16F) experienced a shooting at school last month. I'm still trying to process everything. I'm sitting here with my trauma rearing its head, and I'm not sure how to deal with it. I feel like I'm just going to be stuck in this constant state of fear and anxiety for the rest of my life. I keep replaying the sounds of the shots and the scr…	was in school	education	percentage of school shootings that occur at high schools	4	[2]	ChatGPT	Yes	No	High	0.75	0.61	Yes	https://usafacts.org/articles/the-latest-government-data-on-school-shootings/#:~:text=188-,Source:%20National%20Center%20for%20Education%20Statistics%20Get%20the%20data%20Embed,319	Feasible	Research indicates that the majority of school shootings occur at high schools, as these institutions are larger, serve older students, and often have more incidents of interpersonal conflict compared to elementary or middle schools. Estimates suggest that around 70-80% of school shootings take place at high schools. A reasonable estimate is: <answer>75</answer> Confidence score: 0.9	Multiplication	Out
mentalhealth	TITLE: i was in school last month when a shooting happened I (16F) experienced a shooting at school last month. I'm still trying to process everything. I'm sitting here with my trauma rearing its head, and I'm not sure how to deal with it. I feel like I'm just going to be stuck in this constant state of fear and anxiety for the rest of my life. I keep replaying the sounds of the shots and the scr…	constant state of fear and anxiety for the rest of my life	mental_health	percentage of school shooting survivors that experience severe PTSD	5	[1, 2, 4]	ChatGPT	Yes	Yes	High	0.3	0.28	Yes	https://www.apa.org/monitor/2018/09/survivors	Feasible	Research indicates that exposure to traumatic events, like school shootings, can result in significant psychological impacts. Among survivors, rates of severe PTSD vary but are typically estimated between 25-35%, depending on factors such as proximity to the event, the level of exposure, and available support systems. A reasonable estimate is: <answer>30</answer> Confidence score: 0.85	Multiplication	Out
