# Supplementary material
Source: ML conference proceedings conference paper supplement (https://openreview.net/forum?id=HMVQ00vabY)
Supplement: supplementary_material [file 7.xlsx]

## Sheet: Ordering 1
Subreddit	Post	Disclosure (Ordering)	Disclosure Category	Query	ID	Conditionally Independent?	Source Used	Succeeded?	Reliable?	Annotator Confidence	Value	Ground Truth	Ground Truth Reliability	Ground Truth Source	Disclosure Type	ChatGPT Response	Operation	Parentheses
mentalhealth	TITLE: struggling with depression TW: depression, suicide ideation, self harm i (37M) have had depression for what feels like forever. like it’s been a constant companion waiting to eat me whole. it’s been like that all my life. i feel like death is on the way. i feel like i have no hope any more. i’ve tried everything i can think of therapy, medication, support groups, i don’t know what works. n…	37M	age_gender	Number of people in the US aged 35-39	1	[]	ChatGPT	Yes	Yes	High	22000000	22500000	Yes	https://www.statista.com/statistics/241488/population-of-the-us-by-sex-and-age/	Feasible	The estimated number of people in the U.S. aged 35-39 is approximately 22 million, based on recent population demographics. Confidence Score: 0.85 <answer>22000000</answer>	Multiplication	Begin
mentalhealth	TITLE: struggling with depression TW: depression, suicide ideation, self harm i (37M) have had depression for what feels like forever. like it’s been a constant companion waiting to eat me whole. it’s been like that all my life. i feel like death is on the way. i feel like i have no hope any more. i’ve tried everything i can think of therapy, medication, support groups, i don’t know what works. n…	37M	age_gender	Number of years in the age range 35-39	2	[]	ChatGPT	Yes	Yes	High	5	5	Yes		Feasible	The age range 35-39 includes 5 years. Confidence Score: 1.0 <answer>5</answer>	(Division, 1)	In
mentalhealth	TITLE: struggling with depression TW: depression, suicide ideation, self harm i (37M) have had depression for what feels like forever. like it’s been a constant companion waiting to eat me whole. it’s been like that all my life. i feel like death is on the way. i feel like i have no hope any more. i’ve tried everything i can think of therapy, medication, support groups, i don’t know what works. n…	37M	age_gender	Percentage of people in the US aged 35-39 that are male	3	[]	ChatGPT	Yes	Yes	High	0.5	0.5049	Yes	https://www.statista.com/statistics/241488/population-of-the-us-by-sex-and-age/	Feasible	Approximately 50% of people in the U.S. aged 35-39 are male, based on general population gender distribution trends for this age range. Confidence Score: 0.85 <answer>50</answer>	Multiplication	Out
mentalhealth	TITLE: struggling with depression TW: depression, suicide ideation, self harm i (37M) have had depression for what feels like forever. like it’s been a constant companion waiting to eat me whole. it’s been like that all my life. i feel like death is on the way. i feel like i have no hope any more. i’ve tried everything i can think of therapy, medication, support groups, i don’t know what works. n…	have had depression	mental_health	Percentage of people in the US aged 30-44 that experience depression	4	[1,2,3]	ChatGPT	Yes	Yes	High	0.1	0.103	Yes	https://www.cdc.gov/nchs/products/databriefs/db379.htm#:~:text=Data%20from%20the%20National%20Health%20Interview%20Survey,-In%202019%2C%202.8&text=The%20percentage%20of%20adults%20who%20experienced%20any%20symptoms%20of%20depression,30%E2%80%9344%20(16.8%25).	Feasible	Approximately 10% of people in the U.S. aged 30-44 experience depression, based on recent mental health statistics for this age range. Confidence Score: 0.8 <answer>10</answer>	Multiplication	Out
mentalhealth	TITLE: struggling with depression TW: depression, suicide ideation, self harm i (37M) have had depression for what feels like forever. like it’s been a constant companion waiting to eat me whole. it’s been like that all my life. i feel like death is on the way. i feel like i have no hope any more. i’ve tried everything i can think of therapy, medication, support groups, i don’t know what works. n…	suicide ideation	mental_health	Percentage of those with depression in the US that experience suicidal ideation	5	[1,2,3]	ChatGPT	Yes	No	Medium	0.3	0.2	Yes	https://www.dbsalliance.org/crisis/suicide-prevention-information/suicide-statistics/#:~:text=The%20lifetime%20risk%20of%20suicide,depressive%20disorder%20is%20nearly%2020%25.	Feasible	Approximately 30% of individuals with depression in the U.S. experience suicidal ideation, according to recent mental health statistics. Confidence Score: 0.85 <answer>30</answer>	Multiplication	Out

## Sheet: Ordering 2
Subreddit	Post	Disclosure (Ordering)	Disclosure Category	Query	ID	Conditionally Independent?	Source Used	Succeeded?	Reliable?	Annotator Confidence	Value	Ground Truth	Ground Truth Reliability	Ground Truth Source	Disclosure Type	ChatGPT Response	Operation	Parentheses
mentalhealth	TITLE: struggling with depression TW: depression, suicide ideation, self harm i (37M) have had depression for what feels like forever. like it’s been a constant companion waiting to eat me whole. it’s been like that all my life. i feel like death is on the way. i feel like i have no hope any more. i’ve tried everything i can think of therapy, medication, support groups, i don’t know what works. n…	37M	age_gender	Number of people in the US aged 35-39	1	[]	ChatGPT	Yes	Yes	High	22000000	22500000	Yes	https://www.statista.com/statistics/241488/population-of-the-us-by-sex-and-age/	Feasible	The estimated number of people in the U.S. aged 35-39 is approximately 22 million, based on recent population demographics. Confidence Score: 0.85 <answer>22000000</answer>	Multiplication	Begin
mentalhealth	TITLE: struggling with depression TW: depression, suicide ideation, self harm i (37M) have had depression for what feels like forever. like it’s been a constant companion waiting to eat me whole. it’s been like that all my life. i feel like death is on the way. i feel like i have no hope any more. i’ve tried everything i can think of therapy, medication, support groups, i don’t know what works. n…	37M	age_gender	Number of years in the age range 35-39	2	[]	ChatGPT	Yes	Yes	High	5	5	Yes		Feasible	The age range 35-39 includes 5 years. Confidence Score: 1.0 <answer>5</answer>	(Division, 1)	In
mentalhealth	TITLE: struggling with depression TW: depression, suicide ideation, self harm i (37M) have had depression for what feels like forever. like it’s been a constant companion waiting to eat me whole. it’s been like that all my life. i feel like death is on the way. i feel like i have no hope any more. i’ve tried everything i can think of therapy, medication, support groups, i don’t know what works. n…	37M	age_gender	Percentage of people in the US aged 35-39 that are male	3	[]	ChatGPT	Yes	Yes	High	0.5	0.5049	Yes	https://www.statista.com/statistics/241488/population-of-the-us-by-sex-and-age/	Feasible	Approximately 50% of people in the U.S. aged 35-39 are male, based on general population gender distribution trends for this age range. Confidence Score: 0.85 <answer>50</answer>	Multiplication	Out
mentalhealth	TITLE: struggling with depression TW: depression, suicide ideation, self harm i (37M) have had depression for what feels like forever. like it’s been a constant companion waiting to eat me whole. it’s been like that all my life. i feel like death is on the way. i feel like i have no hope any more. i’ve tried everything i can think of therapy, medication, support groups, i don’t know what works. n…	have had depression	mental_health	Percentage of people in the US aged 30-44 that experience depression	4	[1,2,3]	ChatGPT	Yes	Yes	High	0.1	0.103	Yes	https://www.cdc.gov/nchs/products/databriefs/db379.htm#:~:text=Data%20from%20the%20National%20Health%20Interview%20Survey,-In%202019%2C%202.8&text=The%20percentage%20of%20adults%20who%20experienced%20any%20symptoms%20of%20depression,30%E2%80%9344%20(16.8%25).	Feasible	Approximately 10% of people in the U.S. aged 30-44 experience depression, based on recent mental health statistics for this age range. Confidence Score: 0.8 <answer>10</answer>	Multiplication	Out
mentalhealth	TITLE: struggling with depression TW: depression, suicide ideation, self harm i (37M) have had depression for what feels like forever. like it’s been a constant companion waiting to eat me whole. it’s been like that all my life. i feel like death is on the way. i feel like i have no hope any more. i’ve tried everything i can think of therapy, medication, support groups, i don’t know what works. n…	suicide ideation	mental_health	Percentage of those with depression in the US that experience suicidal ideation	5	[1,2,3]	ChatGPT	Yes	No	Medium	0.3	0.2	Yes	https://www.dbsalliance.org/crisis/suicide-prevention-information/suicide-statistics/#:~:text=The%20lifetime%20risk%20of%20suicide,depressive%20disorder%20is%20nearly%2020%25.	Feasible	Approximately 30% of individuals with depression in the U.S. experience suicidal ideation, according to recent mental health statistics. Confidence Score: 0.85 <answer>30</answer>	Multiplication	Out
mentalhealth	TITLE: struggling with depression TW: depression, suicide ideation, self harm i (37M) have had depression for what feels like forever. like it’s been a constant companion waiting to eat me whole. it’s been like that all my life. i feel like death is on the way. i feel like i have no hope any more. i’ve tried everything i can think of therapy, medication, support groups, i don’t know what works. n…	i’ve tried everything i can think of therapy, medication, support groups	health	Percentage of those with depression in the US that have sought treatment	6	[1,2,3,5]	ChatGPT	Yes	Yes	High	0.66	0.61	Yes	https://www.nimh.nih.gov/health/statistics/major-depression	Feasible	Approximately 66% of individuals with depression in the U.S. have sought treatment, based on recent mental health treatment statistics. Confidence Score: 0.85 <answer>66</answer>	Multiplication	Out
