# Supplementary material
Source: ML conference proceedings conference paper supplement (https://openreview.net/forum?id=HMVQ00vabY)
Supplement: supplementary_material [file 8.xlsx]

## Sheet: Ordering 1
Subreddit	Post	Disclosure (Ordering)	Disclosure Category	Query	ID	Conditionally Independent?	Source Used	Succeeded?	Reliable?	Annotator Confidence	Value	Ground Truth	Ground Truth Reliability	Ground Truth Source	Disclosure Type	ChatGPT Response	Operation	Parentheses
mentalhealth	TITLE: VA vet with BPD. I am an army vet with bipolar disorder. I’ve been struggling with my mental health since I left the army. I have anxiety attacks and depression and I can’t sleep or concentrate. I self medicate with alcohol. My relationship is falling apart and I might lose my job. I feel like I’m losing my mind and I’m scared of what might happen if I don’t get help. I’ve tried therapy an…	I am an army vet	occupation	Number of veterans in the US	1	[]	ChatGPT	Yes	Yes	High	18000000	18100000	Yes	https://www.data.va.gov/stories/s/Veterans-Day-2023/4gqv-ddx7/#:~:text=This%20Veterans%20Day%2C%20we%20explore,in%20FY%202023%20(2).	Feasible	The estimated number of veterans in the U.S. is approximately 18 million. Confidence Score: 0.9 <answer>18000000</answer>	Multiplication	Out
mentalhealth	TITLE: VA vet with BPD. I am an army vet with bipolar disorder. I’ve been struggling with my mental health since I left the army. I have anxiety attacks and depression and I can’t sleep or concentrate. I self medicate with alcohol. My relationship is falling apart and I might lose my job. I feel like I’m losing my mind and I’m scared of what might happen if I don’t get help. I’ve tried therapy an…	My relationship is falling apart	relationship_status	Percentage of veterans in the US that are married	2	[]	ChatGPT	Yes	Yes	High	0.6	0.598	Yes	https://www.ncsl.org/resources/details/veterans-by-the-numbers#:~:text=Veterans%20are%20generally%20better%20educated,47.8%20percent).	Feasible	Approximately 60% of veterans in the U.S. are married, based on demographic data for marital status among veterans. Confidence Score: 0.85 <answer>60</answer>	Multiplication	Out
mentalhealth	TITLE: VA vet with BPD. I am an army vet with bipolar disorder. I’ve been struggling with my mental health since I left the army. I have anxiety attacks and depression and I can’t sleep or concentrate. I self medicate with alcohol. My relationship is falling apart and I might lose my job. I feel like I’m losing my mind and I’m scared of what might happen if I don’t get help. I’ve tried therapy an…	My relationship is falling apart	relationship_status	Percentage of married couples in the US that are unhappy in their marriage	3	[1]	ChatGPT	Yes	Yes	High	0.2	0.14	Yes	https://www.dailypress.net/life/features/2023/08/are-younger-americans-souring-on-marriage/#:~:text=Approximately%2014%25%20of%20couples%20are,feel%20obligated%20to%20stay%20together.&text=For%20some%20people%2C%20relationships%20are,specific%20deal%2Dbreakers%20pop%20up.	Feasible	Approximately 20% of married couples report being unhappy in their marriage, based on relationship satisfaction studies. Confidence Score: 0.8 <answer>20</answer>	Multiplication	Out
mentalhealth	TITLE: VA vet with BPD. I am an army vet with bipolar disorder. I’ve been struggling with my mental health since I left the army. I have anxiety attacks and depression and I can’t sleep or concentrate. I self medicate with alcohol. My relationship is falling apart and I might lose my job. I feel like I’m losing my mind and I’m scared of what might happen if I don’t get help. I’ve tried therapy an…	bipolar disorder	mental_health	Percentage of veterans in the US that have bipolar disorder	4	[2,3]	ChatGPT	Yes	Yes	High	0.06	0.04	Yes	https://veteranslawoffice.com/bipolar-disorder-and-va-disability/#:~:text=When%20an%20individual%20with%20bipolar,puts%20on%20an%20individual's%20finances.	Feasible	Approximately 6% of veterans in the U.S. are estimated to have bipolar disorder, based on mental health prevalence studies among veterans. Confidence Score: 0.8 <answer>6</answer>	Multiplication	Out
mentalhealth	TITLE: VA vet with BPD. I am an army vet with bipolar disorder. I’ve been struggling with my mental health since I left the army. I have anxiety attacks and depression and I can’t sleep or concentrate. I self medicate with alcohol. My relationship is falling apart and I might lose my job. I feel like I’m losing my mind and I’m scared of what might happen if I don’t get help. I’ve tried therapy an…	I self medicate with alcohol	health	Percentage of veterans in the US that drink heavily	5	[2,3,4]	ChatGPT	Yes	Yes	High	0.07	0.0765	Yes	https://greenhousetreatment.com/veterans-and-addiction/alcohol-abuse/#:~:text=Statistics%20on%20Alcoholism%20in%20Veterans,-Veterans%20are%20more&text=Alcohol%2C%20specifically%2C%20is%20one%20of,most%20problematic%20substances%20for%20Veterans.&text=In%20fact%2C%20alcohol%20is%20the,other%20than%20tobacco%2C%20among%20Vets.&text=Alcoholism%20is%20more%20common%20among,than%20female%20Veterans%20…	Feasible	Approximately 7% of veterans in the U.S. are estimated to engage in heavy drinking, based on recent studies of substance use among veterans. Confidence Score: 0.85 <answer>7</answer>	Multiplication	Out
mentalhealth	TITLE: VA vet with BPD. I am an army vet with bipolar disorder. I’ve been struggling with my mental health since I left the army. I have anxiety attacks and depression and I can’t sleep or concentrate. I self medicate with alcohol. My relationship is falling apart and I might lose my job. I feel like I’m losing my mind and I’m scared of what might happen if I don’t get help. I’ve tried therapy an…	I have anxiety attacks and depression	mental_health	Percentage of those with bipolar disorder in the US that face anxiety	6	[1,2,3,5]	ChatGPT	Yes	No	Medium	0.6	0.5	Yes	https://pmc.ncbi.nlm.nih.gov/articles/PMC6323556/#:~:text=Core%20tip%3A%20This%20review%20of,at%20any%20point%20of%20time.	Feasible	Approximately 60% of individuals with bipolar disorder in the U.S. also experience anxiety, based on comorbidity studies in mental health. Confidence Score: 0.85 <answer>60</answer>	Multiplication	Out
mentalhealth	TITLE: VA vet with BPD. I am an army vet with bipolar disorder. I’ve been struggling with my mental health since I left the army. I have anxiety attacks and depression and I can’t sleep or concentrate. I self medicate with alcohol. My relationship is falling apart and I might lose my job. I feel like I’m losing my mind and I’m scared of what might happen if I don’t get help. I’ve tried therapy an…	I’ve tried therapy and meds but they dont work	health	Percentage of those with bipolar disorder in the US that have received treatment	7	[1,2,3,5,6]	ChatGPT	Yes	No	Medium	0.8	0.89	Yes	https://www.ncbi.nlm.nih.gov/pmc/articles/PMC5288268/#:~:text=Findings%20published%20in%202007%20showed,from%20a%20psychiatrist%20(1).	Feasible	Approximately 80% of individuals with bipolar disorder in the U.S. have received treatment, based on mental health care access and utilization studies. Confidence Score: 0.85 <answer>80</answer>	Multiplication	Out
mentalhealth	TITLE: VA vet with BPD. I am an army vet with bipolar disorder. I’ve been struggling with my mental health since I left the army. I have anxiety attacks and depression and I can’t sleep or concentrate. I self medicate with alcohol. My relationship is falling apart and I might lose my job. I feel like I’m losing my mind and I’m scared of what might happen if I don’t get help. I’ve tried therapy an…	my job	occupation	Percentage of those with bipolar disorder in the US that are employed	8	[1,2,3,5,6,7]	ChatGPT	Yes	Yes	High	0.6	0.6	Yes	https://pubmed.ncbi.nlm.nih.gov/23379960/	Feasible	Approximately 60% of individuals with bipolar disorder in the U.S. are employed, according to studies on employment rates among those with mental health conditions. Confidence Score: 0.8 <answer>60</answer>	Multiplication	Out
mentalhealth	TITLE: VA vet with BPD. I am an army vet with bipolar disorder. I’ve been struggling with my mental health since I left the army. I have anxiety attacks and depression and I can’t sleep or concentrate. I self medicate with alcohol. My relationship is falling apart and I might lose my job. I feel like I’m losing my mind and I’m scared of what might happen if I don’t get help. I’ve tried therapy an…	I'm scared of being a statistic	mental_health	Percentage of veterans in the US who report experiencing suicide ideation	9	[2,3,4,5,6,7,8]	ChatGPT	Yes	No	Medium	0.12	0.0439	Yes	https://pmc.ncbi.nlm.nih.gov/articles/PMC10576218/	Feasible	**Thought Process**: Studies and reports, including data from the U.S. Department of Veterans Affairs (VA), indicate that veterans are at higher risk of mental health challenges, including suicide ideation. Research suggests that approximately **10% to 15%** of veterans report experiencing suicide ideation at some point. A reasonable estimate is **12%**. **Confidence Score**: 0.8 <answer>12</answ…	Multiplication	Out

## Sheet: Ordering 2
Subreddit	Post	Disclosure (Ordering)	Disclosure Category	Query	ID	Conditionally Independent?	Source Used	Succeeded?	Reliable?	Annotator Confidence	Value	Ground Truth	Ground Truth Reliability	Ground Truth Source	Disclosure Type	ChatGPT Response	Operation	Parentheses
mentalhealth	TITLE: VA vet with BPD. I am an army vet with bipolar disorder. I’ve been struggling with my mental health since I left the army. I have anxiety attacks and depression and I can’t sleep or concentrate. I self medicate with alcohol. My relationship is falling apart and I might lose my job. I feel like I’m losing my mind and I’m scared of what might happen if I don’t get help. I’ve tried therapy an…	I am an army vet	occupation	Number of veterans in the US	1	[]	ChatGPT	Yes	Yes	High	18000000	18100000	Yes	https://www.data.va.gov/stories/s/Veterans-Day-2023/4gqv-ddx7/#:~:text=This%20Veterans%20Day%2C%20we%20explore,in%20FY%202023%20(2).	Feasible	The estimated number of veterans in the U.S. is approximately 18 million. Confidence Score: 0.9 <answer>18000000</answer>	Multiplication	Out
mentalhealth	TITLE: VA vet with BPD. I am an army vet with bipolar disorder. I’ve been struggling with my mental health since I left the army. I have anxiety attacks and depression and I can’t sleep or concentrate. I self medicate with alcohol. My relationship is falling apart and I might lose my job. I feel like I’m losing my mind and I’m scared of what might happen if I don’t get help. I’ve tried therapy an…	My relationship is falling apart	relationship_status	Percentage of veterans in the US that are married	2	[]	ChatGPT	Yes	Yes	High	0.6	0.598	Yes	https://www.ncsl.org/resources/details/veterans-by-the-numbers#:~:text=Veterans%20are%20generally%20better%20educated,47.8%20percent).	Feasible	Approximately 60% of veterans in the U.S. are married, based on demographic data for marital status among veterans. Confidence Score: 0.85 <answer>60</answer>	Multiplication	Out
mentalhealth	TITLE: VA vet with BPD. I am an army vet with bipolar disorder. I’ve been struggling with my mental health since I left the army. I have anxiety attacks and depression and I can’t sleep or concentrate. I self medicate with alcohol. My relationship is falling apart and I might lose my job. I feel like I’m losing my mind and I’m scared of what might happen if I don’t get help. I’ve tried therapy an…	My relationship is falling apart	relationship_status	Percentage of married couples in the US that are unhappy in their marriage	3	[1]	ChatGPT	Yes	Yes	High	0.2	0.14	Yes	https://www.dailypress.net/life/features/2023/08/are-younger-americans-souring-on-marriage/#:~:text=Approximately%2014%25%20of%20couples%20are,feel%20obligated%20to%20stay%20together.&text=For%20some%20people%2C%20relationships%20are,specific%20deal%2Dbreakers%20pop%20up.	Feasible	Approximately 20% of married couples report being unhappy in their marriage, based on relationship satisfaction studies. Confidence Score: 0.8 <answer>20</answer>	Multiplication	Out
mentalhealth	TITLE: VA vet with BPD. I am an army vet with bipolar disorder. I’ve been struggling with my mental health since I left the army. I have anxiety attacks and depression and I can’t sleep or concentrate. I self medicate with alcohol. My relationship is falling apart and I might lose my job. I feel like I’m losing my mind and I’m scared of what might happen if I don’t get help. I’ve tried therapy an…	bipolar disorder	mental_health	Percentage of veterans in the US that have bipolar disorder	4	[2,3]	ChatGPT	Yes	Yes	High	0.06	0.04	Yes	https://veteranslawoffice.com/bipolar-disorder-and-va-disability/#:~:text=When%20an%20individual%20with%20bipolar,puts%20on%20an%20individual's%20finances.	Feasible	Approximately 6% of veterans in the U.S. are estimated to have bipolar disorder, based on mental health prevalence studies among veterans. Confidence Score: 0.8 <answer>6</answer>	Multiplication	Out
mentalhealth	TITLE: VA vet with BPD. I am an army vet with bipolar disorder. I’ve been struggling with my mental health since I left the army. I have anxiety attacks and depression and I can’t sleep or concentrate. I self medicate with alcohol. My relationship is falling apart and I might lose my job. I feel like I’m losing my mind and I’m scared of what might happen if I don’t get help. I’ve tried therapy an…	I self medicate with alcohol	health	Percentage of veterans in the US that drink heavily	5	[2,3,4]	ChatGPT	Yes	Yes	High	0.07	0.0765	Yes	https://greenhousetreatment.com/veterans-and-addiction/alcohol-abuse/#:~:text=Statistics%20on%20Alcoholism%20in%20Veterans,-Veterans%20are%20more&text=Alcohol%2C%20specifically%2C%20is%20one%20of,most%20problematic%20substances%20for%20Veterans.&text=In%20fact%2C%20alcohol%20is%20the,other%20than%20tobacco%2C%20among%20Vets.&text=Alcoholism%20is%20more%20common%20among,than%20female%20Veterans%20…	Feasible	Approximately 7% of veterans in the U.S. are estimated to engage in heavy drinking, based on recent studies of substance use among veterans. Confidence Score: 0.85 <answer>7</answer>	Multiplication	Out
mentalhealth	TITLE: VA vet with BPD. I am an army vet with bipolar disorder. I’ve been struggling with my mental health since I left the army. I have anxiety attacks and depression and I can’t sleep or concentrate. I self medicate with alcohol. My relationship is falling apart and I might lose my job. I feel like I’m losing my mind and I’m scared of what might happen if I don’t get help. I’ve tried therapy an…	I have anxiety attacks and depression	mental_health	Percentage of those with bipolar disorder in the US that face anxiety	6	[1,2,3,5]	ChatGPT	Yes	No	Medium	0.6	0.5	Yes	https://pmc.ncbi.nlm.nih.gov/articles/PMC6323556/#:~:text=Core%20tip%3A%20This%20review%20of,at%20any%20point%20of%20time.	Feasible	Approximately 60% of individuals with bipolar disorder in the U.S. also experience anxiety, based on comorbidity studies in mental health. Confidence Score: 0.85 <answer>60</answer>	Multiplication	Out
mentalhealth	TITLE: VA vet with BPD. I am an army vet with bipolar disorder. I’ve been struggling with my mental health since I left the army. I have anxiety attacks and depression and I can’t sleep or concentrate. I self medicate with alcohol. My relationship is falling apart and I might lose my job. I feel like I’m losing my mind and I’m scared of what might happen if I don’t get help. I’ve tried therapy an…	I’ve tried therapy and meds but they dont work	health	Percentage of those with bipolar disorder in the US that receive unsuccessful treatment	7	[1,2,3,5,6]	ChatGPT	Yes	Yes	High	0.3	0.3	Yes	https://www.transformationstreatment.center/treatment/bipolar-disorder-statistics/	Feasible	Approximately 30% of individuals with bipolar disorder in the U.S. experience unsuccessful treatment, either due to treatment resistance, side effects, or lack of sustained symptom management, according to mental health treatment effectiveness studies. Confidence Score: 0.8 <answer>30</answer>	Multiplication	Out
mentalhealth	TITLE: VA vet with BPD. I am an army vet with bipolar disorder. I’ve been struggling with my mental health since I left the army. I have anxiety attacks and depression and I can’t sleep or concentrate. I self medicate with alcohol. My relationship is falling apart and I might lose my job. I feel like I’m losing my mind and I’m scared of what might happen if I don’t get help. I’ve tried therapy an…	I might lose my job	occupation	Percentage of those with bipolar disorder in the US that are employed	8	[1,2,3,5,6,7]	ChatGPT	Yes	Yes	High	0.6	0.6	Yes	https://pubmed.ncbi.nlm.nih.gov/23379960/	Feasible	Approximately 60% of individuals with bipolar disorder in the U.S. are employed, according to studies on employment rates among those with mental health conditions. Confidence Score: 0.8 <answer>60</answer>	Multiplication	Out
mentalhealth	TITLE: VA vet with BPD. I am an army vet with bipolar disorder. I’ve been struggling with my mental health since I left the army. I have anxiety attacks and depression and I can’t sleep or concentrate. I self medicate with alcohol. My relationship is falling apart and I might lose my job. I feel like I’m losing my mind and I’m scared of what might happen if I don’t get help. I’ve tried therapy an…	I can’t sleep or concentrate	health	Percentage of those with bipolar disorder in the US that experience sleep disturbances	9	[1,2,3,5,6,7,8]	ChatGPT	Yes	Yes	High	0.65	0.7	Yes	https://pmc.ncbi.nlm.nih.gov/articles/PMC3321357/#:~:text=70%25%20exhibited%20clinically%20significant%20sleep%20disturbance.&text=Outpatient-,Relative%20to%20healthy%20nonpatients%2C%20bipolar%20patients%20exhibited,longer%20total%20sleep%20time%20(actigraphic)	Feasible	Approximately 65% of individuals with bipolar disorder in the U.S. experience sleep disturbances, based on studies on the comorbid symptoms of bipolar disorder. Confidence Score: 0.85 <answer>65</answer>	Multiplication	Out
mentalhealth	TITLE: VA vet with BPD. I am an army vet with bipolar disorder. I’ve been struggling with my mental health since I left the army. I have anxiety attacks and depression and I can’t sleep or concentrate. I self medicate with alcohol. My relationship is falling apart and I might lose my job. I feel like I’m losing my mind and I’m scared of what might happen if I don’t get help. I’ve tried therapy an…	I might lose my job	occupation	Percentage of those employed in the US that are worried about losing their job	10	[1,2,3,4,5,6,7,9]	ChatGPT	Yes	Yes	High	0.25	0.25	Yes	https://nypost.com/2024/04/29/lifestyle/1-in-4-employed-americans-worry-their-job-is-in-danger-new-study-says/	Feasible	Approximately 25% of employed individuals in the U.S. are worried about losing their job, based on recent surveys on job security and economic anxiety. Confidence Score: 0.8 <answer>25</answer>	Multiplication	Out
mentalhealth	TITLE: VA vet with BPD. I am an army vet with bipolar disorder. I’ve been struggling with my mental health since I left the army. I have anxiety attacks and depression and I can’t sleep or concentrate. I self medicate with alcohol. My relationship is falling apart and I might lose my job. I feel like I’m losing my mind and I’m scared of what might happen if I don’t get help. I’ve tried therapy an…	I'm scared of being a statistic	mental_health	Percentage of veterans in the US who report experiencing suicide ideation	11	[2, 3, 4, 5, 6, 7, 8, 9, 10]	ChatGPT	Yes	No	Medium	0.12	0.0439	Yes	https://pmc.ncbi.nlm.nih.gov/articles/PMC10576218/	Feasible	**Thought Process**: Studies and reports, including data from the U.S. Department of Veterans Affairs (VA), indicate that veterans are at higher risk of mental health challenges, including suicide ideation. Research suggests that approximately **10% to 15%** of veterans report experiencing suicide ideation at some point. A reasonable estimate is **12%**. **Confidence Score**: 0.8 <answer>12</answ…	Multiplication	Out
