# Supplementary material
Source: ML conference proceedings conference paper supplement (https://openreview.net/forum?id=HMVQ00vabY)
Supplement: supplementary_material [file 8.xlsx]

## Sheet: Ordering 1
Subreddit	Post	Disclosure (Ordering)	Disclosure Category	Query	ID	Conditionally Independent?	Source Used	Succeeded?	Reliable?	Annotator Confidence	Value	Ground Truth	Ground Truth Reliability	Ground Truth Source	Disclosure Type	ChatGPT Response	Operation	Parentheses
mentalhealth	TITLE: struggling from former relationship 29m here and I'm still trying to pick up the pieces of my life after a 5 year relationship with my toxic ex. I've been trying to focus on my career, but it's hard when every day feels like a struggle. I've been having a lot of anxiety and depression symptoms, and I've been using weed and booze to cope. I'm starting to wonder if I'll ever be able to break…	29m	age_gender	number of 29 year old men in the United States	1	[]	ChatGPT	Yes	No	Medium	3960000	2310810	Yes	https://www.census.gov/popclock/data_tables.php?component=pyramid	Feasible	To estimate the number of 29-year-olds in the U.S., we can use the general age distribution of the population. The U.S. population is approximately 330 million, and the age group of 25–29 year-olds typically makes up about 6% of the total population. So, the estimated number of 29-year-olds would be: 330,000,000×0.06÷5≈3,960,000 <answer>3960000</answer> Confidence score: 0.9	Multiplication	Out
mentalhealth	TITLE: struggling from former relationship 29m here and I'm still trying to pick up the pieces of my life after a 5 year relationship with my toxic ex. I've been trying to focus on my career, but it's hard when every day feels like a struggle. I've been having a lot of anxiety and depression symptoms, and I've been using weed and booze to cope. I'm starting to wonder if I'll ever be able to break…	after a 5 year relationship with my toxic ex	relationship_status	Percentage of unmarried couples in the US that break up	2	[1]	ChatGPT	Yes	Yes	High	0.6	0.54	Yes	https://ifstudies.org/blog/cohabitation-doesnt-help-your-odds-of-marital-success	Feasible	**Thought Process**: Breakup rates among unmarried couples in the U.S. tend to be relatively high compared to married couples. Studies and relationship research suggest that around **50% to 70%** of unmarried relationships eventually end, depending on the length and nature of the relationship. A middle estimate seems most reasonable. **Confidence Score**: 0.8 <answer>60</answer>	Multiplication	Out
mentalhealth	TITLE: struggling from former relationship 29m here and I'm still trying to pick up the pieces of my life after a 5 year relationship with my toxic ex. I've been trying to focus on my career, but it's hard when every day feels like a struggle. I've been having a lot of anxiety and depression symptoms, and I've been using weed and booze to cope. I'm starting to wonder if I'll ever be able to break…	after a 5 year relationship with my toxic ex	relationship_status	percentage of people that have had a toxic romantic partner	3	[1, 2]	ChatGPT	Yes	No	High	0.4	0.488	Yes	https://www.thehotline.org/stakeholders/domestic-violence-statistics/#:~:text=2010%20Summary%20Report.-,Atlanta%2C%20GA:%20National%20Center%20for%20Injury%20Prevention%20and%20Control%2C,intimate%20partner%20violence%20were%20female.&text=Most%20female%20victims%20of%20intimate,for%20ages%2035%20to%2049.	Feasible	Studies and surveys suggest that a significant portion of people have experienced toxic or unhealthy relationships at some point. Estimates generally range from 30% to 50% of individuals reporting having been in a toxic romantic relationship. This can include patterns of emotional, psychological, or physical abuse, manipulation, or control. A reasonable estimate is: <answer>40</answer> Confidence…	Multiplication	Out
mentalhealth	TITLE: struggling from former relationship 29m here and I'm still trying to pick up the pieces of my life after a 5 year relationship with my toxic ex. I've been trying to focus on my career, but it's hard when every day feels like a struggle. I've been having a lot of anxiety and depression symptoms, and I've been using weed and booze to cope. I'm starting to wonder if I'll ever be able to break…	PTSD	mental_health	percentage of people experiencing emotional or physical abuse from their partner that later develop PTSD	4	[1, 2]	ChatGPT	Yes	No	Low	0.4	0.75	Yes	https://pmc.ncbi.nlm.nih.gov/articles/PMC3381987/#:~:text=PTSD%20arises%20from%20exposure%20to,PTSD%20(Woods%2C%202000).	Feasible	Research indicates that a significant portion of individuals who experience emotional or physical abuse in romantic relationships can develop PTSD. Estimates suggest that around 30-50% of those who experience abuse in intimate relationships go on to develop some form of PTSD, though the severity can vary based on the nature of the abuse and individual resilience. A reasonable estimate is: <answer…	Multiplication	Out
mentalhealth	TITLE: struggling from former relationship 29m here and I'm still trying to pick up the pieces of my life after a 5 year relationship with my toxic ex. I've been trying to focus on my career, but it's hard when every day feels like a struggle. I've been having a lot of anxiety and depression symptoms, and I've been using weed and booze to cope. I'm starting to wonder if I'll ever be able to break…	anxiety and depression symptoms	mental_health	percentage of people with PTSD that experience anxiety and depression	5	[1, 2, 3]	ChatGPT	Yes	No	High	0.6	0.94	Yes	https://bmcpsychiatry.biomedcentral.com/articles/10.1186/s12888-021-03076-7	Feasible	It is well-documented that anxiety and depression are common comorbid conditions for individuals with PTSD. Studies suggest that approximately 50-70% of people with PTSD also experience symptoms of anxiety or depression, as the trauma can significantly affect mental health in multiple ways. A reasonable estimate is: <answer>60</answer> Confidence score: 0.9	Multiplication	Out
mentalhealth	TITLE: struggling from former relationship 29m here and I'm still trying to pick up the pieces of my life after a 5 year relationship with my toxic ex. I've been trying to focus on my career, but it's hard when every day feels like a struggle. I've been having a lot of anxiety and depression symptoms, and I've been using weed and booze to cope. I'm starting to wonder if I'll ever be able to break…	using weed and booze to cope	personal_experience	percentage of people with PTSD that suffer from substance abuse issues	6	[1, 2, 3, 5]	ChatGPT	Yes	No	Low	0.35	0.75	No	https://pmc.ncbi.nlm.nih.gov/articles/PMC5375032/#:~:text=Individuals%20with%20PTSD%20have%20high,of%20individuals%20(Baker%20et%20al.	Feasible	Substance abuse is a common comorbidity among individuals with PTSD. Studies suggest that approximately 30-40% of people with PTSD also experience substance abuse issues, as they may use substances to cope with the emotional distress caused by trauma. A reasonable estimate is: <answer>35</answer> Confidence score: 0.85	Multiplication	Out

## Sheet: Ordering 2
Subreddit	Post	Disclosure (Ordering)	Disclosure Category	Query	ID	Conditionally Independent?	Source Used	Succeeded?	Reliable?	Annotator Confidence	Value	Ground Truth	Ground Truth Reliability	Ground Truth Source	Disclosure Type	ChatGPT Response	Operation	Parentheses
mentalhealth	TITLE: struggling from former relationship 29m here and I'm still trying to pick up the pieces of my life after a 5 year relationship with my toxic ex. I've been trying to focus on my career, but it's hard when every day feels like a struggle. I've been having a lot of anxiety and depression symptoms, and I've been using weed and booze to cope. I'm starting to wonder if I'll ever be able to break…	29m	age_gender	number of 29 year old men in the United States	1	[]	ChatGPT	Yes	No	Medium	3960000	2310810	Yes	https://www.census.gov/popclock/data_tables.php?component=pyramid	Feasible	To estimate the number of 29-year-olds in the U.S., we can use the general age distribution of the population. The U.S. population is approximately 330 million, and the age group of 25–29 year-olds typically makes up about 6% of the total population. So, the estimated number of 29-year-olds would be: 330,000,000×0.06÷5≈3,960,000 <answer>3960000</answer> Confidence score: 0.9	Multiplication	Out
mentalhealth	TITLE: struggling from former relationship 29m here and I'm still trying to pick up the pieces of my life after a 5 year relationship with my toxic ex. I've been trying to focus on my career, but it's hard when every day feels like a struggle. I've been having a lot of anxiety and depression symptoms, and I've been using weed and booze to cope. I'm starting to wonder if I'll ever be able to break…	after a 5 year relationship with my toxic ex	relationship_status	Percentage of unmarried couples in the US that break up	2	[1]	ChatGPT	Yes	Yes	High	0.6	0.54	Yes	https://ifstudies.org/blog/cohabitation-doesnt-help-your-odds-of-marital-success	Feasible	**Thought Process**: Breakup rates among unmarried couples in the U.S. tend to be relatively high compared to married couples. Studies and relationship research suggest that around **50% to 70%** of unmarried relationships eventually end, depending on the length and nature of the relationship. A middle estimate seems most reasonable. **Confidence Score**: 0.8 <answer>60</answer>	Multiplication	Out
mentalhealth	TITLE: struggling from former relationship 29m here and I'm still trying to pick up the pieces of my life after a 5 year relationship with my toxic ex. I've been trying to focus on my career, but it's hard when every day feels like a struggle. I've been having a lot of anxiety and depression symptoms, and I've been using weed and booze to cope. I'm starting to wonder if I'll ever be able to break…	after a 5 year relationship with my toxic ex	relationship_status	percentage of relationships that end after exactly 5 years	3	[1, 2]	ChatGPT	Yes	Yes	High	0.12	0.18	Yes	https://www.graphext.com/post/make-or-break-relationships	Feasible	The specific percentage of relationships that end after exactly five years is not easily available, but research on relationship duration and breakup trends suggests that many relationships face challenges after a few years, particularly around the 3-5 year mark. It's estimated that a significant portion of relationships that end, do so within the first few years. However, exact data for "exactly…	Multiplication	Out
mentalhealth	TITLE: struggling from former relationship 29m here and I'm still trying to pick up the pieces of my life after a 5 year relationship with my toxic ex. I've been trying to focus on my career, but it's hard when every day feels like a struggle. I've been having a lot of anxiety and depression symptoms, and I've been using weed and booze to cope. I'm starting to wonder if I'll ever be able to break…	after a 5 year relationship with my toxic ex	relationship_status	percentage of people that have had a toxic romantic partner	4	[1, 2, 3]	ChatGPT	Yes	No	High	0.4	0.488	Yes	https://www.thehotline.org/stakeholders/domestic-violence-statistics/#:~:text=2010%20Summary%20Report.-,Atlanta%2C%20GA:%20National%20Center%20for%20Injury%20Prevention%20and%20Control%2C,intimate%20partner%20violence%20were%20female.&text=Most%20female%20victims%20of%20intimate,for%20ages%2035%20to%2049.	Feasible	Studies and surveys suggest that a significant portion of people have experienced toxic or unhealthy relationships at some point. Estimates generally range from 30% to 50% of individuals reporting having been in a toxic romantic relationship. This can include patterns of emotional, psychological, or physical abuse, manipulation, or control. A reasonable estimate is: <answer>40</answer> Confidence…	Multiplication	Out
mentalhealth	TITLE: struggling from former relationship 29m here and I'm still trying to pick up the pieces of my life after a 5 year relationship with my toxic ex. I've been trying to focus on my career, but it's hard when every day feels like a struggle. I've been having a lot of anxiety and depression symptoms, and I've been using weed and booze to cope. I'm starting to wonder if I'll ever be able to break…	anxiety and depression symptoms	mental_health	percentage of people that experience anxiety and depression after a breakup	5	[1, 2, 3, 4]	ChatGPT	Yes	No	Medium	0.4	0.268	Yes	https://pmc.ncbi.nlm.nih.gov/articles/PMC10727987/#:~:text=Verhallen%20et%20al.,six%20months%20reported%20depressive%20symptoms.	Feasible	Breakups can be emotionally challenging, and it's common for individuals to experience anxiety and depression as a result. Studies suggest that approximately 30-50% of people experience symptoms of anxiety and depression following a breakup, with factors such as the length of the relationship, emotional attachment, and the circumstances surrounding the breakup influencing the severity of these fe…	Multiplication	Out
