# Supplementary material
Source: ML conference proceedings conference paper supplement (https://openreview.net/forum?id=HMVQ00vabY)
Supplement: supplementary_material [file 9.xlsx]

## Sheet: Ordering 1
Subreddit	Post	Disclosure (Ordering)	Disclosure Category	Query	ID	Conditionally Independent?	Source Used	Succeeded?	Reliable?	Annotator Confidence	Value	Ground Truth	Ground Truth Reliability	Ground Truth Source	Disclosure Type	ChatGPT Response	Operation	Parentheses
mentalhealth	TITLE: I'm 3 years out from anorexia recovery and it's weird I was diagnosed with anorexia when I was 19. I was hospitalized for a while and then went to outpatient treatment for about a year. I'm 22 now and I've been in recovery for 3 years. It's weird because I'm finally starting to realize the impact it had on my life. I'm not just talking about the obvious things like weight gain and hair los…	I'm 22 now	age	number of people in the US that are 22 years old	1	[]	ChatGPT	Yes	No	Medium	3300000	4387190	Yes	https://www.census.gov/popclock/data_tables.php?component=pyramid	Feasible	To estimate the number of 22-year-olds in the United States, we can use the total U.S. population of approximately 330 million. The U.S. population is generally distributed fairly evenly across age groups, with each year group making up about 1/100th of the total population. For 22-year-olds: 330,000,000×1/100=3,300,000 <answer>3300000</answer> Confidence score: 0.9	Multiplication	Out
mentalhealth	TITLE: I'm 3 years out from anorexia recovery and it's weird I was diagnosed with anorexia when I was 19. I was hospitalized for a while and then went to outpatient treatment for about a year. I'm 22 now and I've been in recovery for 3 years. It's weird because I'm finally starting to realize the impact it had on my life. I'm not just talking about the obvious things like weight gain and hair los…	diagnosed with anorexia when I was 19	health	percentage of 19 year olds that are diagnosed with an eating disorder	2	[1]	ChatGPT	Yes	Yes	High	0.025	0.05		https://www.singlecare.com/blog/news/eating-disorder-statistics/		Eating disorders, including anorexia, bulimia, and binge eating disorder, affect a significant portion of young adults. Research suggests that approximately 2-3% of 19-year-olds are diagnosed with some form of eating disorder, with females being more likely to be diagnosed than males. A reasonable estimate is: <answer>2.5</answer> Confidence score: 0.85	Multiplication	Out
mentalhealth	TITLE: I'm 3 years out from anorexia recovery and it's weird I was diagnosed with anorexia when I was 19. I was hospitalized for a while and then went to outpatient treatment for about a year. I'm 22 now and I've been in recovery for 3 years. It's weird because I'm finally starting to realize the impact it had on my life. I'm not just talking about the obvious things like weight gain and hair los…	I used to think that I was worthless	mental_health	percentage of people diagnosed with anorexia that have depressive symptoms	3	[1]	ChatGPT	Yes	No	Medium	0.6	0.75	Yes	https://www.eatingrecoverycenter.com/resources/depression-eating-disorders#:~:text=Between%2050%25%20to%2075%25%20of,of%20Mental%20Health%20(NIMH).	Feasible	Research indicates that a significant proportion of individuals diagnosed with anorexia nervosa also experience depressive symptoms. Estimates suggest that approximately 50-70% of individuals with anorexia also struggle with depression, as the two conditions often co-occur due to the psychological and emotional stress associated with the disorder. A reasonable estimate is: <answer>60</answer> Con…	Multiplication	Out
mentalhealth	TITLE: I'm 3 years out from anorexia recovery and it's weird I was diagnosed with anorexia when I was 19. I was hospitalized for a while and then went to outpatient treatment for about a year. I'm 22 now and I've been in recovery for 3 years. It's weird because I'm finally starting to realize the impact it had on my life. I'm not just talking about the obvious things like weight gain and hair los…	3 years out from anorexia recovery	health	percentage of people diagnosed with anorexia that recover in 3 years	4	[1, 3]	ChatGPT	Yes	Yes	High	0.35	0.326	Yes	https://pmc.ncbi.nlm.nih.gov/articles/PMC7883487/#:~:text=Mean%20recovery%20in%20anorexia%20nervosa,of%20individuals%20with%20anorexia%20nervosa.	Feasible	Recovery from anorexia nervosa can be a long and challenging process, and the rate of recovery within a specific timeframe varies. Research suggests that around 30-40% of individuals diagnosed with anorexia experience full recovery within 3 years, while others may experience partial recovery or struggle with ongoing issues. A reasonable estimate is: <answer>35</answer> Confidence score: 0.85	Multiplication	Out

## Sheet: Ordering 2
Subreddit	Post	Disclosure (Ordering)	Disclosure Category	Query	ID	Conditionally Independent?	Source Used	Succeeded?	Reliable?	Annotator Confidence	Value	Ground Truth	Ground Truth Reliability	Ground Truth Source	Disclosure Type	ChatGPT Response	Operation	Parentheses
mentalhealth	TITLE: I'm 3 years out from anorexia recovery and it's weird I was diagnosed with anorexia when I was 19. I was hospitalized for a while and then went to outpatient treatment for about a year. I'm 22 now and I've been in recovery for 3 years. It's weird because I'm finally starting to realize the impact it had on my life. I'm not just talking about the obvious things like weight gain and hair los…	I'm 22 now	age	number of people in the US that are 22 years old	1	[]	ChatGPT	Yes	No	Medium	3300000	4387190	Yes	https://www.census.gov/popclock/data_tables.php?component=pyramid	Feasible	To estimate the number of 22-year-olds in the United States, we can use the total U.S. population of approximately 330 million. The U.S. population is generally distributed fairly evenly across age groups, with each year group making up about 1/100th of the total population. For 22-year-olds: 330,000,000×1/100=3,300,000 <answer>3300000</answer> Confidence score: 0.9	Multiplication	Out
mentalhealth	TITLE: I'm 3 years out from anorexia recovery and it's weird I was diagnosed with anorexia when I was 19. I was hospitalized for a while and then went to outpatient treatment for about a year. I'm 22 now and I've been in recovery for 3 years. It's weird because I'm finally starting to realize the impact it had on my life. I'm not just talking about the obvious things like weight gain and hair los…	diagnosed with anorexia when I was 19	health	percentage of 19 year olds that are diagnosed with anorexia	2	[1]	ChatGPT	Yes	Yes	High	0.008	0.006	Yes	https://www.nimh.nih.gov/health/statistics/eating-disorders	Feasible	Anorexia nervosa typically affects a small percentage of adolescents and young adults. Among 19-year-olds, studies suggest that the prevalence of anorexia is around 0.5-1% of the population. This percentage may be higher among females due to the disorder's higher incidence in women. A reasonable estimate is: <answer>0.8</answer> Confidence score: 0.85	Multiplication	Out
mentalhealth	TITLE: I'm 3 years out from anorexia recovery and it's weird I was diagnosed with anorexia when I was 19. I was hospitalized for a while and then went to outpatient treatment for about a year. I'm 22 now and I've been in recovery for 3 years. It's weird because I'm finally starting to realize the impact it had on my life. I'm not just talking about the obvious things like weight gain and hair los…	I used to think that I was worthless	mental_health	percentage of people diagnosed with anorexia that have depressive symptoms	3	[1]	ChatGPT	Yes	No	Medium	0.6	0.75	Yes	https://www.eatingrecoverycenter.com/resources/depression-eating-disorders#:~:text=Between%2050%25%20to%2075%25%20of,of%20Mental%20Health%20(NIMH).	Feasible	Research indicates that a significant proportion of individuals diagnosed with anorexia nervosa also experience depressive symptoms. Estimates suggest that approximately 50-70% of individuals with anorexia also struggle with depression, as the two conditions often co-occur due to the psychological and emotional stress associated with the disorder. A reasonable estimate is: <answer>60</answer> Con…	Multiplication	Out
mentalhealth	TITLE: I'm 3 years out from anorexia recovery and it's weird I was diagnosed with anorexia when I was 19. I was hospitalized for a while and then went to outpatient treatment for about a year. I'm 22 now and I've been in recovery for 3 years. It's weird because I'm finally starting to realize the impact it had on my life. I'm not just talking about the obvious things like weight gain and hair los…	3 years out from anorexia recovery	health	percentage of people diagnosed with anorexia that recover in 3 years	4	[1, 3]	ChatGPT	Yes	Yes	High	0.35	0.326	Yes	https://pmc.ncbi.nlm.nih.gov/articles/PMC7883487/#:~:text=Mean%20recovery%20in%20anorexia%20nervosa,of%20individuals%20with%20anorexia%20nervosa.	Feasible	Recovery from anorexia nervosa can be a long and challenging process, and the rate of recovery within a specific timeframe varies. Research suggests that around 30-40% of individuals diagnosed with anorexia experience full recovery within 3 years, while others may experience partial recovery or struggle with ongoing issues. A reasonable estimate is: <answer>35</answer> Confidence score: 0.85	Multiplication	Out
mentalhealth	TITLE: I'm 3 years out from anorexia recovery and it's weird I was diagnosed with anorexia when I was 19. I was hospitalized for a while and then went to outpatient treatment for about a year. I'm 22 now and I've been in recovery for 3 years. It's weird because I'm finally starting to realize the impact it had on my life. I'm not just talking about the obvious things like weight gain and hair los…	I'm starting to see that I am worthy of love and respect	mental_health	percentage of people recovering from anorexia that also recover from depression	5	[1, 3]	ChatGPT	Yes	No	Low	0.55	0.8	No	https://equip.health/articles/treatment-and-recovery/depression-anorexia-treatment	Important	Recovery from anorexia nervosa often includes recovery from associated mental health conditions like depression. Studies suggest that among individuals who recover from anorexia, around 50-60% also experience recovery from depressive symptoms, as addressing the underlying issues of anorexia can lead to improvements in mood and mental health. A reasonable estimate is: <answer>55</answer> Confidenc…	Multiplication	Out
