# Supplementary material
Source: ML conference proceedings conference paper supplement (https://openreview.net/forum?id=HMVQ00vabY)
Supplement: supplementary_material [file 9.xlsx]

## Sheet: Ordering 1
Subreddit	Post	Disclosure (Ordering)	Disclosure Category	Query	ID	Conditionally Independent?	Source Used	Succeeded?	Reliable?	Annotator Confidence	Value	Ground Truth	Ground Truth Reliability	Ground Truth Source	Disclosure Type	ChatGPT Response	Operation	Parentheses
mentalhealth	TITLE: I think my mom tried to murder me I (22f) have been having a really hard time lately. my mom has been trying to control my life for years and it's been getting worse and worse. I'm walking on eggshells all the time, never knowing when she's going to blow up at me. Everytime I talk to her she gets defensive and tells me I'm being dramatic. I've even tried to set boundaries with her, but she…	22f	age_gender	Number of people aged 20-24 in the US	1	[]	ChatGPT	Yes	Yes	High	22000000	21810000	Yes	https://www.statista.com/statistics/241488/population-of-the-us-by-sex-and-age/	Feasible	The estimated number of people aged 20-24 in the U.S. is approximately 22 million, based on recent population demographics. Confidence Score: 0.85 <answer>22000000</answer>	Multiplication	Begin
mentalhealth	TITLE: I think my mom tried to murder me I (22f) have been having a really hard time lately. my mom has been trying to control my life for years and it's been getting worse and worse. I'm walking on eggshells all the time, never knowing when she's going to blow up at me. Everytime I talk to her she gets defensive and tells me I'm being dramatic. I've even tried to set boundaries with her, but she…	22f	age_gender	Number of years in the age range 20-24	2	[]	ChatGPT	Yes	Yes	High	5	5	Yes		Feasible	The age range 20-24 includes 5 years. Confidence Score: 1.0 <answer>5</answer>	(Division, 1)	In
mentalhealth	TITLE: I think my mom tried to murder me I (22f) have been having a really hard time lately. my mom has been trying to control my life for years and it's been getting worse and worse. I'm walking on eggshells all the time, never knowing when she's going to blow up at me. Everytime I talk to her she gets defensive and tells me I'm being dramatic. I've even tried to set boundaries with her, but she…	22f	age_gender	Percentage of people aged 20-24 in the US that are female	3	[]	ChatGPT	Yes	Yes	High	0.49	0.4897	Yes	https://www.statista.com/statistics/241488/population-of-the-us-by-sex-and-age/	Feasible	Approximately 49% of people aged 20-24 in the U.S. are female, based on recent demographic data. Confidence Score: 0.9 <answer>49</answer>	Multiplication	Out
mentalhealth	TITLE: I think my mom tried to murder me I (22f) have been having a really hard time lately. my mom has been trying to control my life for years and it's been getting worse and worse. I'm walking on eggshells all the time, never knowing when she's going to blow up at me. Everytime I talk to her she gets defensive and tells me I'm being dramatic. I've even tried to set boundaries with her, but she…	my mom has been trying to control my life for years	personal_experience	Percentage of people in the US that report emotional abuse from a parent	4	[1,2,3]	ChatGPT	Yes	Yes	High	0.3	0.36	Yes	https://www.businessinsider.com/guides/health/mental-health/am-i-being-emotionally-abused-by-my-parents	Feasible	Approximately 30% of people in the U.S. report experiencing emotional abuse from a parent at some point, based on surveys and studies on childhood maltreatment. Confidence Score: 0.8 <answer>30</answer>	Multiplication	Out
mentalhealth	TITLE: I think my mom tried to murder me I (22f) have been having a really hard time lately. my mom has been trying to control my life for years and it's been getting worse and worse. I'm walking on eggshells all the time, never knowing when she's going to blow up at me. Everytime I talk to her she gets defensive and tells me I'm being dramatic. I've even tried to set boundaries with her, but she…	she grabbed a knife and started waving it around	personal_experience	Percentage of children in the US that have been exposed to family violence	5	[1,2,3,4]	ChatGPT	Yes	Yes	High	0.25	0.25	Yes	https://www.ojp.gov/program/programs/cev	Feasible	Approximately 25% of people in the U.S. report having been exposed to family violence, based on studies and surveys on domestic and family violence. Confidence Score: 0.8 <answer>25</answer>	Multiplication	Out

## Sheet: Ordering 2
Subreddit	Post	Disclosure (Ordering)	Disclosure Category	Query	ID	Conditionally Independent?	Source Used	Succeeded?	Reliable?	Annotator Confidence	Value	Ground Truth	Ground Truth Reliability	Ground Truth Source	Disclosure Type	ChatGPT Response	Operation	Parentheses
mentalhealth	TITLE: I think my mom tried to murder me I (22f) have been having a really hard time lately. my mom has been trying to control my life for years and it's been getting worse and worse. I'm walking on eggshells all the time, never knowing when she's going to blow up at me. Everytime I talk to her she gets defensive and tells me I'm being dramatic. I've even tried to set boundaries with her, but she…	22f	age_gender	Number of people aged 20-24 in the US	1	[]	ChatGPT	Yes	Yes	High	22000000	21810000	Yes	https://www.statista.com/statistics/241488/population-of-the-us-by-sex-and-age/	Feasible	The estimated number of people aged 20-24 in the U.S. is approximately 22 million, based on recent population demographics. Confidence Score: 0.85 <answer>22000000</answer>	Multiplication	Begin
mentalhealth	TITLE: I think my mom tried to murder me I (22f) have been having a really hard time lately. my mom has been trying to control my life for years and it's been getting worse and worse. I'm walking on eggshells all the time, never knowing when she's going to blow up at me. Everytime I talk to her she gets defensive and tells me I'm being dramatic. I've even tried to set boundaries with her, but she…	22f	age_gender	Number of years in the age range 20-24	2	[]	ChatGPT	Yes	Yes	High	5	5	Yes		Feasible	The age range 20-24 includes 5 years. Confidence Score: 1.0 <answer>5</answer>	(Division, 1)	In
mentalhealth	TITLE: I think my mom tried to murder me I (22f) have been having a really hard time lately. my mom has been trying to control my life for years and it's been getting worse and worse. I'm walking on eggshells all the time, never knowing when she's going to blow up at me. Everytime I talk to her she gets defensive and tells me I'm being dramatic. I've even tried to set boundaries with her, but she…	22f	age_gender	Percentage of people aged 20-24 in the US that are female	3	[]	ChatGPT	Yes	Yes	High	0.49	0.4897	Yes	https://www.statista.com/statistics/241488/population-of-the-us-by-sex-and-age/	Feasible	Approximately 49% of people aged 20-24 in the U.S. are female, based on recent demographic data. Confidence Score: 0.9 <answer>49</answer>	Multiplication	Out
mentalhealth	TITLE: I think my mom tried to murder me I (22f) have been having a really hard time lately. my mom has been trying to control my life for years and it's been getting worse and worse. I'm walking on eggshells all the time, never knowing when she's going to blow up at me. Everytime I talk to her she gets defensive and tells me I'm being dramatic. I've even tried to set boundaries with her, but she…	I'm afraid of what she'll do if I come back	emotional_disclosure	Percentage of people in the US that are estranged from a close family member	4	[1,2,3]	ChatGPT	Yes	No	Low	0.1	0.27	Yes	https://www.economist.com/united-states/2021/05/20/how-many-american-children-have-cut-contact-with-their-parents	Feasible	Approximately 10% of people in the U.S. report being estranged from a close family member, based on recent studies on family relationships and estrangement. Confidence Score: 0.8 <answer>10</answer>	Multiplication	Out
mentalhealth	TITLE: I think my mom tried to murder me I (22f) have been having a really hard time lately. my mom has been trying to control my life for years and it's been getting worse and worse. I'm walking on eggshells all the time, never knowing when she's going to blow up at me. Everytime I talk to her she gets defensive and tells me I'm being dramatic. I've even tried to set boundaries with her, but she…	she grabbed a knife and started waving it around	personal_experience	Percentage of children in the US that have been exposed to family violence	5	[1,2,3,4]	ChatGPT	Yes	Yes	High	0.25	0.25	Yes	https://www.ojp.gov/program/programs/cev	Feasible	Approximately 25% of people in the U.S. report having been exposed to family violence, based on studies and surveys on domestic and family violence. Confidence Score: 0.8 <answer>25</answer>	Multiplication	Out
