# Supplementary material
Source: ML conference proceedings conference paper supplement (https://openreview.net/forum?id=HMVQ00vabY)
Supplement: supplementary_material [file 10.xlsx]

## Sheet: Ordering 1
Subreddit	Post	Disclosure (Ordering)	Disclosure Category	Query	ID	Conditionally Independent?	Source Used	Succeeded?	Reliable?	Annotator Confidence	Value	Ground Truth	Ground Truth Reliability	Ground Truth Source	Disclosure Type	ChatGPT Response	Operation	Parentheses
twoxchromosomes	TITLE: I feel like I'm stuck in a rut and I'm ashamed of who I am I (34f) recently ended a relationship with someone who was emotionally abusive. I was in it for 8 years and it was a toxic relationship that made me feel like I wasn't good enough. I thought I was strong enough to handle it, but I realize now that I was just enabling him. I'm ashamed of myself for staying in it for so long and for …	34f	age_gender	number of 34 year old women in the United States	1	[]	ChatGPT	Yes	Yes	High	1650000	2310810	Yes	https://www.census.gov/popclock/data_tables.php?component=pyramid	Feasible	To estimate the number of 34-year-old women in the United States, we can use the total U.S. population of approximately 330 million and the fact that women typically make up about 50% of the population. The population of each age group tends to be relatively even, so we estimate the number of people in the 34-year-old age group to be roughly 1/100th of the total population. For 34-year-old women:…	Multiplication	Out
twoxchromosomes	TITLE: I feel like I'm stuck in a rut and I'm ashamed of who I am I (34f) recently ended a relationship with someone who was emotionally abusive. I was in it for 8 years and it was a toxic relationship that made me feel like I wasn't good enough. I thought I was strong enough to handle it, but I realize now that I was just enabling him. I'm ashamed of myself for staying in it for so long and for …	ended a relationship	relationship_status	Percentage of unmarried couples in the US that break up	2	[1]	ChatGPT	Yes	Yes	High	0.6	0.54	Yes	https://ifstudies.org/blog/cohabitation-doesnt-help-your-odds-of-marital-success	Feasible	**Thought Process**: Breakup rates among unmarried couples in the U.S. tend to be relatively high compared to married couples. Studies and relationship research suggest that around **50% to 70%** of unmarried relationships eventually end, depending on the length and nature of the relationship. A middle estimate seems most reasonable. **Confidence Score**: 0.8 <answer>60</answer>	Multiplication	Out
twoxchromosomes	TITLE: I feel like I'm stuck in a rut and I'm ashamed of who I am I (34f) recently ended a relationship with someone who was emotionally abusive. I was in it for 8 years and it was a toxic relationship that made me feel like I wasn't good enough. I thought I was strong enough to handle it, but I realize now that I was just enabling him. I'm ashamed of myself for staying in it for so long and for …	with someone who was emotionally abusive	relationship_status	percentage of people that have had a toxic romantic partner	3	[1, 2]	ChatGPT	Yes	No	High	0.4	0.484	Yes	https://www.thehotline.org/stakeholders/domestic-violence-statistics/#:~:text=2010%20Summary%20Report.-,Atlanta%2C%20GA:%20National%20Center%20for%20Injury%20Prevention%20and%20Control%2C,intimate%20partner%20violence%20were%20female.&text=Most%20female%20victims%20of%20intimate,for%20ages%2035%20to%2049.	Feasible	Studies and surveys suggest that a significant portion of people have experienced toxic or unhealthy relationships at some point. Estimates generally range from 30% to 50% of individuals reporting having been in a toxic romantic relationship. This can include patterns of emotional, psychological, or physical abuse, manipulation, or control. A reasonable estimate is: <answer>40</answer> Confidence…	Multiplication	Out
twoxchromosomes	TITLE: I feel like I'm stuck in a rut and I'm ashamed of who I am I (34f) recently ended a relationship with someone who was emotionally abusive. I was in it for 8 years and it was a toxic relationship that made me feel like I wasn't good enough. I thought I was strong enough to handle it, but I realize now that I was just enabling him. I'm ashamed of myself for staying in it for so long and for …	I was in it for 8 years	relationship_status	percentage of relationships that end after exactly 8 years	4	[1, 2, 3]	ChatGPT	Yes	Yes	High	0.07	0.15	Yes	https://www.graphext.com/post/make-or-break-relationships	Feasible	While exact data on the percentage of relationships that end after exactly 8 years is not readily available, research on relationship duration trends suggests that many long-term relationships experience challenges around the 7-10 year mark, often referred to as the "7-year itch." Breakups tend to increase in the later years of a relationship, particularly around the 5-10 year range. A reasonable…	Multiplication	Out
twoxchromosomes	TITLE: I feel like I'm stuck in a rut and I'm ashamed of who I am I (34f) recently ended a relationship with someone who was emotionally abusive. I was in it for 8 years and it was a toxic relationship that made me feel like I wasn't good enough. I thought I was strong enough to handle it, but I realize now that I was just enabling him. I'm ashamed of myself for staying in it for so long and for …	I'm struggling with anxiety and depression	mental_health	percentage of people that experience anxiety and depression after a breakup	5	[1, 2, 3, 4]	ChatGPT	Yes	No	Medium	0.4	0.268	Yes	https://pmc.ncbi.nlm.nih.gov/articles/PMC10727987/#:~:text=Verhallen%20et%20al.,six%20months%20reported%20depressive%20symptoms.	Feasible	Breakups can be emotionally challenging, and it's common for individuals to experience anxiety and depression as a result. Studies suggest that approximately 30-50% of people experience symptoms of anxiety and depression following a breakup, with factors such as the length of the relationship, emotional attachment, and the circumstances surrounding the breakup influencing the severity of these fe…	Multiplication	Out

## Sheet: Ordering 2
Subreddit	Post	Disclosure (Ordering)	Disclosure Category	Query	ID	Conditionally Independent?	Source Used	Succeeded?	Reliable?	Annotator Confidence	Value	Ground Truth	Ground Truth Reliability	Ground Truth Source	Disclosure Type	ChatGPT Response	Operation	Parentheses
twoxchromosomes	TITLE: I feel like I'm stuck in a rut and I'm ashamed of who I am I (34f) recently ended a relationship with someone who was emotionally abusive. I was in it for 8 years and it was a toxic relationship that made me feel like I wasn't good enough. I thought I was strong enough to handle it, but I realize now that I was just enabling him. I'm ashamed of myself for staying in it for so long and for …	34f	age_gender	number of 34 year old women in the United States	1	[]	ChatGPT	Yes	Yes	High	1650000	2310810	Yes	https://www.census.gov/popclock/data_tables.php?component=pyramid	Feasible	To estimate the number of 34-year-old women in the United States, we can use the total U.S. population of approximately 330 million and the fact that women typically make up about 50% of the population. The population of each age group tends to be relatively even, so we estimate the number of people in the 34-year-old age group to be roughly 1/100th of the total population. For 34-year-old women:…	Multiplication	Out
twoxchromosomes	TITLE: I feel like I'm stuck in a rut and I'm ashamed of who I am I (34f) recently ended a relationship with someone who was emotionally abusive. I was in it for 8 years and it was a toxic relationship that made me feel like I wasn't good enough. I thought I was strong enough to handle it, but I realize now that I was just enabling him. I'm ashamed of myself for staying in it for so long and for …	ended a relationship	relationship_status	Percentage of unmarried couples in the US that break up	2	[1]	ChatGPT	Yes	Yes	High	0.6	0.54	Yes	https://ifstudies.org/blog/cohabitation-doesnt-help-your-odds-of-marital-success	Feasible	**Thought Process**: Breakup rates among unmarried couples in the U.S. tend to be relatively high compared to married couples. Studies and relationship research suggest that around **50% to 70%** of unmarried relationships eventually end, depending on the length and nature of the relationship. A middle estimate seems most reasonable. **Confidence Score**: 0.8 <answer>60</answer>	Multiplication	Out
twoxchromosomes	TITLE: I feel like I'm stuck in a rut and I'm ashamed of who I am I (34f) recently ended a relationship with someone who was emotionally abusive. I was in it for 8 years and it was a toxic relationship that made me feel like I wasn't good enough. I thought I was strong enough to handle it, but I realize now that I was just enabling him. I'm ashamed of myself for staying in it for so long and for …	with someone who was emotionally abusive	relationship_status	percentage of people that have had a toxic romantic partner	3	[1, 2]	ChatGPT	Yes	No	High	0.4	0.484	Yes	https://www.thehotline.org/stakeholders/domestic-violence-statistics/#:~:text=2010%20Summary%20Report.-,Atlanta%2C%20GA:%20National%20Center%20for%20Injury%20Prevention%20and%20Control%2C,intimate%20partner%20violence%20were%20female.&text=Most%20female%20victims%20of%20intimate,for%20ages%2035%20to%2049.	Feasible	Studies and surveys suggest that a significant portion of people have experienced toxic or unhealthy relationships at some point. Estimates generally range from 30% to 50% of individuals reporting having been in a toxic romantic relationship. This can include patterns of emotional, psychological, or physical abuse, manipulation, or control. A reasonable estimate is: <answer>40</answer> Confidence…	Multiplication	Out
twoxchromosomes	TITLE: I feel like I'm stuck in a rut and I'm ashamed of who I am I (34f) recently ended a relationship with someone who was emotionally abusive. I was in it for 8 years and it was a toxic relationship that made me feel like I wasn't good enough. I thought I was strong enough to handle it, but I realize now that I was just enabling him. I'm ashamed of myself for staying in it for so long and for …	I'm struggling with anxiety and depression	mental_health	percentage of people that experience anxiety and depression after a breakup	4	[1, 2, 3]	ChatGPT	Yes	No	Medium	0.4	0.268	Yes	https://pmc.ncbi.nlm.nih.gov/articles/PMC10727987/#:~:text=Verhallen%20et%20al.,six%20months%20reported%20depressive%20symptoms.	Feasible	Breakups can be emotionally challenging, and it's common for individuals to experience anxiety and depression as a result. Studies suggest that approximately 30-50% of people experience symptoms of anxiety and depression following a breakup, with factors such as the length of the relationship, emotional attachment, and the circumstances surrounding the breakup influencing the severity of these fe…	Multiplication	Out
