# Supplementary material
Source: ML conference proceedings conference paper supplement (https://openreview.net/forum?id=HMVQ00vabY)
Supplement: supplementary_material [file 10.xlsx]

## Sheet: Ordering 1
Subreddit	Post	Disclosure (Ordering)	Disclosure Category	Query	ID	Conditionally Independent?	Source Used	Succeeded?	Reliable?	Annotator Confidence	Value	Ground Truth	Ground Truth Reliability	Ground Truth Source	Disclosure Type	ChatGPT Response	Operation	Parentheses
mentalhealth	TITLE: Feeling hopeless I'm 27 and I feel like this is the end. I've been feeling suicidal for the past few weeks and I don't know how to stop the thoughts from consuming me. I've been struggling with depression and anxiety for years, but it's gotten worse since I graduated from college. I'm not really living. I've lost touch with my friends and family, and I feel like I'm just existing in a stat…	I'm 27	age	Number of people in the US aged 25-29	1	[]	ChatGPT	Yes	Yes	High	23000000	22020000	Yes	https://www.statista.com/statistics/241488/population-of-the-us-by-sex-and-age/	Feasible	The estimated number of people in the U.S. aged 25-29 is approximately 23 million, based on recent demographic data. Confidence Score: 0.85 <answer>23000000</answer>	Multiplication	Begin
mentalhealth	TITLE: Feeling hopeless I'm 27 and I feel like this is the end. I've been feeling suicidal for the past few weeks and I don't know how to stop the thoughts from consuming me. I've been struggling with depression and anxiety for years, but it's gotten worse since I graduated from college. I'm not really living. I've lost touch with my friends and family, and I feel like I'm just existing in a stat…	I'm 27	age	Number of years in the age range 25-29	2	[]	ChatGPT	Yes	Yes	High	5	5	Yes		Feasible	The age range 25-29 includes 5 years. Confidence Score: 1.0 <answer>5</answer>	(Division, 1)	In
mentalhealth	TITLE: Feeling hopeless I'm 27 and I feel like this is the end. I've been feeling suicidal for the past few weeks and I don't know how to stop the thoughts from consuming me. I've been struggling with depression and anxiety for years, but it's gotten worse since I graduated from college. I'm not really living. I've lost touch with my friends and family, and I feel like I'm just existing in a stat…	since I graduated from college	education	Percentage of US adult population that has a college degree	3	[1,2]	ChatGPT	Yes	No	Medium	0.42	0.543	Yes	https://www.forbes.com/sites/michaeltnietzel/2024/02/01/percentage-of-us-adults-with-college-degrees-edges-higher-finds-lumina-report/#:~:text=The%20percentage%20of%20adults%20in,more%20than%2016%20percentage%20points.	Feasible	Approximately 42% of the U.S. adult population holds a college degree, based on recent educational attainment data. Confidence Score: 0.9 <answer>42</answer>	Multiplication	Out
mentalhealth	TITLE: Feeling hopeless I'm 27 and I feel like this is the end. I've been feeling suicidal for the past few weeks and I don't know how to stop the thoughts from consuming me. I've been struggling with depression and anxiety for years, but it's gotten worse since I graduated from college. I'm not really living. I've lost touch with my friends and family, and I feel like I'm just existing in a stat…	I've been struggling with depression and anxiety	mental_health	Percentage of US population that suffers from depression	4	[1,2,3]	ChatGPT	Yes	Yes	High	0.084	0.08	Yes	https://mhanational.org/conditions/depression#:~:text=Major%20depression%20is%20one%20of,are%20affected%20by%20major%20depression.	Feasible	Approximately 8.4% of the U.S. population suffers from depression, based on recent mental health statistics. Confidence Score: 0.9 <answer>8.4</answer>	Multiplication	Out
mentalhealth	TITLE: Feeling hopeless I'm 27 and I feel like this is the end. I've been feeling suicidal for the past few weeks and I don't know how to stop the thoughts from consuming me. I've been struggling with depression and anxiety for years, but it's gotten worse since I graduated from college. I'm not really living. I've lost touch with my friends and family, and I feel like I'm just existing in a stat…	I've been struggling with depression and anxiety	mental_health	Percentage of US population suffering from depression that also experiences anxiety	5	[1,2,3]	ChatGPT	Yes	No	Medium	0.6	0.5	Yes	https://pmc.ncbi.nlm.nih.gov/articles/PMC181193/#:~:text=THE%20EPIDEMIOLOGY%20OF%20COMORBIDITY&text=Among%20patients%20in%20the%20community,anxiety%20disorder%20(Figure%203).	Feasible	Approximately 60% of individuals in the U.S. suffering from depression also experience anxiety, based on comorbidity studies in mental health. Confidence Score: 0.85 <answer>60</answer>	Multiplication	Out
mentalhealth	TITLE: Feeling hopeless I'm 27 and I feel like this is the end. I've been feeling suicidal for the past few weeks and I don't know how to stop the thoughts from consuming me. I've been struggling with depression and anxiety for years, but it's gotten worse since I graduated from college. I'm not really living. I've lost touch with my friends and family, and I feel like I'm just existing in a stat…	I've been feeling suicidal	mental_health	Percentage of those with depression in the US that experience suicidal ideation	6	[1,2,3,5]	ChatGPT	Yes	No	Medium	0.3	0.2	Yes	https://www.dbsalliance.org/crisis/suicide-prevention-information/suicide-statistics/#:~:text=The%20lifetime%20risk%20of%20suicide,depressive%20disorder%20is%20nearly%2020%25.	Feasible	Approximately 30% of individuals with depression in the U.S. experience suicidal ideation, according to recent mental health statistics. Confidence Score: 0.85 <answer>30</answer>	Multiplication	Out

## Sheet: Ordering 2
Subreddit	Post	Disclosure (Ordering)	Disclosure Category	Query	ID	Conditionally Independent?	Source Used	Succeeded?	Reliable?	Annotator Confidence	Value	Ground Truth	Ground Truth Reliability	Ground Truth Source	Disclosure Type	ChatGPT Response	Operation	Parentheses
mentalhealth	TITLE: Feeling hopeless I'm 27 and I feel like this is the end. I've been feeling suicidal for the past few weeks and I don't know how to stop the thoughts from consuming me. I've been struggling with depression and anxiety for years, but it's gotten worse since I graduated from college. I'm not really living. I've lost touch with my friends and family, and I feel like I'm just existing in a stat…	I'm 27	age	Number of people in the US aged 25-29	1	[]	ChatGPT	Yes	Yes	High	23000000	22020000	Yes	https://www.statista.com/statistics/241488/population-of-the-us-by-sex-and-age/	Feasible	The estimated number of people in the U.S. aged 25-29 is approximately 23 million, based on recent demographic data. Confidence Score: 0.85 <answer>23000000</answer>	Multiplication	Begin
mentalhealth	TITLE: Feeling hopeless I'm 27 and I feel like this is the end. I've been feeling suicidal for the past few weeks and I don't know how to stop the thoughts from consuming me. I've been struggling with depression and anxiety for years, but it's gotten worse since I graduated from college. I'm not really living. I've lost touch with my friends and family, and I feel like I'm just existing in a stat…	I'm 27	age	Number of years in the age range 25-29	2	[]	ChatGPT	Yes	Yes	High	5	5	Yes		Feasible	The age range 25-29 includes 5 years. Confidence Score: 1.0 <answer>5</answer>	(Division, 1)	In
mentalhealth	TITLE: Feeling hopeless I'm 27 and I feel like this is the end. I've been feeling suicidal for the past few weeks and I don't know how to stop the thoughts from consuming me. I've been struggling with depression and anxiety for years, but it's gotten worse since I graduated from college. I'm not really living. I've lost touch with my friends and family, and I feel like I'm just existing in a stat…	since I graduated from college	education	Percentage of US adult population that has a college degree	3	[1,2]	ChatGPT	Yes	No	Medium	0.42	0.543	Yes	https://www.forbes.com/sites/michaeltnietzel/2024/02/01/percentage-of-us-adults-with-college-degrees-edges-higher-finds-lumina-report/#:~:text=The%20percentage%20of%20adults%20in,more%20than%2016%20percentage%20points.	Feasible	Approximately 42% of the U.S. adult population holds a college degree, based on recent educational attainment data. Confidence Score: 0.9 <answer>42</answer>	Multiplication	Out
mentalhealth	TITLE: Feeling hopeless I'm 27 and I feel like this is the end. I've been feeling suicidal for the past few weeks and I don't know how to stop the thoughts from consuming me. I've been struggling with depression and anxiety for years, but it's gotten worse since I graduated from college. I'm not really living. I've lost touch with my friends and family, and I feel like I'm just existing in a stat…	I've been struggling with depression and anxiety	mental_health	Percentage of US population that suffers from depression	4	[1,2,3]	ChatGPT	Yes	Yes	High	0.084	0.08	Yes	https://mhanational.org/conditions/depression#:~:text=Major%20depression%20is%20one%20of,are%20affected%20by%20major%20depression.	Feasible	Approximately 8.4% of the U.S. population suffers from depression, based on recent mental health statistics. Confidence Score: 0.9 <answer>8.4</answer>	Multiplication	Out
mentalhealth	TITLE: Feeling hopeless I'm 27 and I feel like this is the end. I've been feeling suicidal for the past few weeks and I don't know how to stop the thoughts from consuming me. I've been struggling with depression and anxiety for years, but it's gotten worse since I graduated from college. I'm not really living. I've lost touch with my friends and family, and I feel like I'm just existing in a stat…	I've been struggling with depression and anxiety	mental_health	Percentage of US population suffering from depression that also experiences anxiety	5	[1,2,3]	ChatGPT	Yes	No	Medium	0.6	0.5	Yes	https://pmc.ncbi.nlm.nih.gov/articles/PMC181193/#:~:text=THE%20EPIDEMIOLOGY%20OF%20COMORBIDITY&text=Among%20patients%20in%20the%20community,anxiety%20disorder%20(Figure%203).	Feasible	Approximately 60% of individuals in the U.S. suffering from depression also experience anxiety, based on comorbidity studies in mental health. Confidence Score: 0.85 <answer>60</answer>	Multiplication	Out
mentalhealth	TITLE: Feeling hopeless I'm 27 and I feel like this is the end. I've been feeling suicidal for the past few weeks and I don't know how to stop the thoughts from consuming me. I've been struggling with depression and anxiety for years, but it's gotten worse since I graduated from college. I'm not really living. I've lost touch with my friends and family, and I feel like I'm just existing in a stat…	I've been feeling suicidal	mental_health	Percentage of those with depression in the US that experience suicidal ideation	6	[1,2,3,5]	ChatGPT	Yes	No	Medium	0.3	0.2	Yes	https://www.dbsalliance.org/crisis/suicide-prevention-information/suicide-statistics/#:~:text=The%20lifetime%20risk%20of%20suicide,depressive%20disorder%20is%20nearly%2020%25.	Feasible	Approximately 30% of individuals with depression in the U.S. experience suicidal ideation, according to recent mental health statistics. Confidence Score: 0.85 <answer>30</answer>	Multiplication	Out
mentalhealth	TITLE: Feeling hopeless I'm 27 and I feel like this is the end. I've been feeling suicidal for the past few weeks and I don't know how to stop the thoughts from consuming me. I've been struggling with depression and anxiety for years, but it's gotten worse since I graduated from college. I'm not really living. I've lost touch with my friends and family, and I feel like I'm just existing in a stat…	I've tried therapy and medication	health	Percentage of those with depression in the US that have received treatment	7	[1,2,3,5,6]	ChatGPT	Yes	Yes	High	0.66	0.61	Yes	https://www.nimh.nih.gov/health/statistics/major-depression#:~:text=In%202021%2C%20an%20estimated%2061.0,treatment%20in%20the%20past%20year.	Feasible	Approximately 66% of individuals with depression in the U.S. have received treatment, based on recent mental health care utilization data. Confidence Score: 0.85 <answer>66</answer>	Multiplication	Out
mentalhealth	TITLE: Feeling hopeless I'm 27 and I feel like this is the end. I've been feeling suicidal for the past few weeks and I don't know how to stop the thoughts from consuming me. I've been struggling with depression and anxiety for years, but it's gotten worse since I graduated from college. I'm not really living. I've lost touch with my friends and family, and I feel like I'm just existing in a stat…	I've lost touch with my friends and family	mental_health	Percentage of those with depression in the US that report difficulty with social interaction	8	[1,2,3,5,6,7]	ChatGPT	Yes	Yes	High	0.45	0.502	Yes	https://www.cdc.gov/nchs/products/databriefs/db303.htm#:~:text=50.2%25%20of%20adults%20with%20depression,because%20of%20their%20depression%20symptoms.	Feasible	Approximately 45% of individuals with depression in the U.S. report difficulty with social interaction, based on studies on the social impact of depression. Confidence Score: 0.8 <answer>45</answer>	Multiplication	Out
