# Supplementary material
Source: ML conference proceedings conference paper supplement (https://openreview.net/forum?id=HMVQ00vabY)
Supplement: supplementary_material [file 11.xlsx]

## Sheet: Ordering 1
Subreddit	Post	Disclosure (Ordering)	Disclosure Category	Query	ID	Conditionally Independent?	Source Used	Succeeded?	Reliable?	Annotator Confidence	Value	Ground Truth	Ground Truth Reliability	Ground Truth Source	Disclosure Type	ChatGPT Response	Operation	Parentheses
twoxchromosomes	TITLE: Trapped in an emotionally abusive relationship I am with a partner who's emotionally abusive. He constantly belittles me and tells me I'm not good enough, and it's taking a toll on my mental health. I'm 31 and have been with him for 3 years. We have a 2-year-old daughter together, and I don't know how I'll provide for her on my own. He keeps saying I'm lucky to have him and that I should b…	31, twoxchromosomes	age_gender	number of 31 year old women in the United States	1	[]	ChatGPT	Yes	Yes	High	1650000	2344300	Yes	https://www.census.gov/popclock/data_tables.php?component=pyramid	Feasible	To estimate the number of 34-year-old women in the United States, we use the total U.S. population of approximately 330 million. Women make up about 50% of the population, and each year of age is roughly 1% of the total population. 330,000,000×0.5× 1/100 =1,650,000 <answer>1650000</answer> Confidence score: 0.9	Multiplication	Out
twoxchromosomes	TITLE: Trapped in an emotionally abusive relationship I am with a partner who's emotionally abusive. He constantly belittles me and tells me I'm not good enough, and it's taking a toll on my mental health. I'm 31 and have been with him for 3 years. We have a 2-year-old daughter together, and I don't know how I'll provide for her on my own. He keeps saying I'm lucky to have him and that I should b…	I am with a partner	relationship_status	percentage of people in the US in a relationship	2	[1]	ChatGPT	Yes	No	Medium	0.55	0.68	Yes	https://www.pewresearch.org/internet/2006/02/13/romance-in-america/#:~:text=21%25%20of%20all%20adult%20Americans,actively%20looking%20for%20romantic%20partners.	Feasible	Research and surveys, such as those from the Pew Research Center, suggest that approximately 50-60% of adults in the United States are in a romantic relationship at any given time. This includes those who are married, cohabiting, or dating. A reasonable estimate is: <answer>55</answer> Confidence score: 0.9	Multiplication	Out
twoxchromosomes	TITLE: Trapped in an emotionally abusive relationship I am with a partner who's emotionally abusive. He constantly belittles me and tells me I'm not good enough, and it's taking a toll on my mental health. I'm 31 and have been with him for 3 years. We have a 2-year-old daughter together, and I don't know how I'll provide for her on my own. He keeps saying I'm lucky to have him and that I should b…	emotionally abusive relationship	relationship_status	percentage of people that are currently in an emotionally abusive relationship	3	[1, 2]	ChatGPT	Yes	No	High	0.12	0.23	Yes	https://www.abs.gov.au/articles/domestic-violence-experiences-partner-emotional-abuse#:~:text=An%20estimated%20one%20in%20four,million)%20by%20a%20previous%20partner	Feasible	Studies suggest that approximately 10-15% of people in relationships are currently in an emotionally abusive relationship. This includes patterns of manipulation, verbal degradation, control, or psychological harm that persist during the relationship. A reasonable estimate is: <answer>12</answer> Confidence score: 0.8	Multiplication	Out
twoxchromosomes	TITLE: Trapped in an emotionally abusive relationship I am with a partner who's emotionally abusive. He constantly belittles me and tells me I'm not good enough, and it's taking a toll on my mental health. I'm 31 and have been with him for 3 years. We have a 2-year-old daughter together, and I don't know how I'll provide for her on my own. He keeps saying I'm lucky to have him and that I should b…	We have a 2-year-old daughter	family	percentage of unmarried couples that have children	4	[1, 3]	ChatGPT	Yes	No	High	0.45	0.029	Yes	https://www.census.gov/library/stories/2023/05/family-households-still-the-majority.html#:~:text=In%202020%2C%20there%20were%20roughly,of%20the%20U.S.%20household%20population.	Feasible	Research indicates that approximately 40-50% of unmarried couples in the United States have children. This percentage can vary based on factors such as socioeconomic status, cultural norms, and the duration of the relationship. A reasonable estimate is: <answer>45</answer> Confidence score: 0.85	Multiplication	Begin
twoxchromosomes	TITLE: Trapped in an emotionally abusive relationship I am with a partner who's emotionally abusive. He constantly belittles me and tells me I'm not good enough, and it's taking a toll on my mental health. I'm 31 and have been with him for 3 years. We have a 2-year-old daughter together, and I don't know how I'll provide for her on my own. He keeps saying I'm lucky to have him and that I should b…	We have a 2-year-old daughter	family	most common number of genders	5	[1, 3]	ChatGPT	Yes	Yes	High	2	2	Yes		Feasible	The most commonly recognized number of genders in many societies is two, corresponding to the binary genders: male and female. However, in broader discussions, particularly in cultural and academic contexts, many recognize additional genders beyond the binary, acknowledging non-binary, genderqueer, and other identities. For simplicity and traditional societal norms: <answer>2</answer> Confidence …	Division, 1	In
twoxchromosomes	TITLE: Trapped in an emotionally abusive relationship I am with a partner who's emotionally abusive. He constantly belittles me and tells me I'm not good enough, and it's taking a toll on my mental health. I'm 31 and have been with him for 3 years. We have a 2-year-old daughter together, and I don't know how I'll provide for her on my own. He keeps saying I'm lucky to have him and that I should b…	I'm scared to leave him	relationship_status	percentage of people in emotionally abusive relationships that stay in the relationship	6	[1, 4, 5]	ChatGPT	Yes	No	Low	0.6	0.857	No	https://dvcccpa.org/fast-facts-statistics/#:~:text=Nearly%20half%20of%20all%20women,psychologically%20abuse%20them%20(5).	Important	Studies indicate that a significant percentage of individuals in emotionally abusive relationships remain in the relationship, often due to factors such as fear, financial dependency, low self-esteem, or hope that the relationship will improve. Estimates suggest that about 50-70% of people in emotionally abusive relationships stay for a prolonged period. A reasonable estimate is: <answer>60</answ…	Multiplication	Out
twoxchromosomes	TITLE: Trapped in an emotionally abusive relationship I am with a partner who's emotionally abusive. He constantly belittles me and tells me I'm not good enough, and it's taking a toll on my mental health. I'm 31 and have been with him for 3 years. We have a 2-year-old daughter together, and I don't know how I'll provide for her on my own. He keeps saying I'm lucky to have him and that I should b…	I have anxiety and depression	mental_health	percentage of people in an abusive relationship that have anxiety and depression	7	[1, 4, 5, 6]	ChatGPT	Yes	Yes	High	0.7	0.75	Yes	https://pmc.ncbi.nlm.nih.gov/articles/PMC3381987/#:~:text=Similar%20to%20the%20high%20prevalence,%2C%20&%20Rose%2C%202002).	Feasible	Research indicates that a significant majority of individuals in abusive relationships experience mental health challenges such as anxiety and depression. Estimates suggest that around 60-80% of people in abusive relationships report symptoms of anxiety and/or depression due to the ongoing psychological and emotional strain. A reasonable estimate is: <answer>70</answer> Confidence score: 0.9	Multiplication	Out

## Sheet: Ordering 2
Subreddit	Post	Disclosure (Ordering)	Disclosure Category	Query	ID	Conditionally Independent?	Source Used	Succeeded?	Reliable?	Annotator Confidence	Value	Ground Truth	Ground Truth Reliability	Ground Truth Source	Disclosure Type	ChatGPT Response	Operation	Parentheses
twoxchromosomes	TITLE: Trapped in an emotionally abusive relationship I am with a partner who's emotionally abusive. He constantly belittles me and tells me I'm not good enough, and it's taking a toll on my mental health. I'm 31 and have been with him for 3 years. We have a 2-year-old daughter together, and I don't know how I'll provide for her on my own. He keeps saying I'm lucky to have him and that I should b…	31, twoxchromosomes	age_gender	number of 31 year old women in the United States	1	[]	ChatGPT	Yes	Yes	High	1650000	2344300	Yes	https://www.census.gov/popclock/data_tables.php?component=pyramid	Feasible	To estimate the number of 34-year-old women in the United States, we use the total U.S. population of approximately 330 million. Women make up about 50% of the population, and each year of age is roughly 1% of the total population. 330,000,000×0.5× 1/100 =1,650,000 <answer>1650000</answer> Confidence score: 0.9	Multiplication	Out
twoxchromosomes	TITLE: Trapped in an emotionally abusive relationship I am with a partner who's emotionally abusive. He constantly belittles me and tells me I'm not good enough, and it's taking a toll on my mental health. I'm 31 and have been with him for 3 years. We have a 2-year-old daughter together, and I don't know how I'll provide for her on my own. He keeps saying I'm lucky to have him and that I should b…	have been with him for 3 years	relationship_status	percentage of people that are in a relationship for less than 5 years	2	[1]	ChatGPT	Yes	No	Medium	0.5	0.21	Yes	https://www.pewresearch.org/internet/2006/02/13/romance-in-america/#:~:text=21%25%20of%20all%20adult%20Americans,actively%20looking%20for%20romantic%20partners.	Feasible	Data on relationship duration suggests that a significant proportion of people in relationships are in relatively new ones, with many lasting less than 5 years. Studies estimate that around 40-60% of individuals in relationships fall into this category, depending on factors like age and marital status. A reasonable estimate is: <answer>50</answer> Confidence score: 0.85	Multiplication	Out
twoxchromosomes	TITLE: Trapped in an emotionally abusive relationship I am with a partner who's emotionally abusive. He constantly belittles me and tells me I'm not good enough, and it's taking a toll on my mental health. I'm 31 and have been with him for 3 years. We have a 2-year-old daughter together, and I don't know how I'll provide for her on my own. He keeps saying I'm lucky to have him and that I should b…	emotionally abusive relationship	relationship_status	percentage of people that have experienced emotional abuse in a relationship	3	[1, 2]	ChatGPT	Yes	No	High	0.4	0.484	Yes	https://www.thehotline.org/stakeholders/domestic-violence-statistics/#:~:text=2010%20Summary%20Report.-,Atlanta%2C%20GA:%20National%20Center%20for%20Injury%20Prevention%20and%20Control%2C,intimate%20partner%20violence%20were%20female.&text=Most%20female%20victims%20of%20intimate,for%20ages%2035%20to%2049.	Feasible	Studies and surveys on emotional abuse indicate that approximately 30-50% of people have experienced some form of emotional abuse in a romantic relationship. This includes behaviors like manipulation, verbal insults, controlling actions, and other forms of psychological harm. A reasonable estimate is: <answer>40</answer> Confidence score: 0.85	Multiplication	Out
twoxchromosomes	TITLE: Trapped in an emotionally abusive relationship I am with a partner who's emotionally abusive. He constantly belittles me and tells me I'm not good enough, and it's taking a toll on my mental health. I'm 31 and have been with him for 3 years. We have a 2-year-old daughter together, and I don't know how I'll provide for her on my own. He keeps saying I'm lucky to have him and that I should b…	We have a 2-year-old daughter	family	percentage of unmarried couples that have children	4	[1, 2, 3]	ChatGPT	Yes	No	High	0.45	0.029	Yes	https://www.census.gov/library/stories/2023/05/family-households-still-the-majority.html#:~:text=In%202020%2C%20there%20were%20roughly,of%20the%20U.S.%20household%20population.	Feasible	Research indicates that approximately 40-50% of unmarried couples in the United States have children. This percentage can vary based on factors such as socioeconomic status, cultural norms, and the duration of the relationship. A reasonable estimate is: <answer>45</answer> Confidence score: 0.85	Multiplication	Begin
twoxchromosomes	TITLE: Trapped in an emotionally abusive relationship I am with a partner who's emotionally abusive. He constantly belittles me and tells me I'm not good enough, and it's taking a toll on my mental health. I'm 31 and have been with him for 3 years. We have a 2-year-old daughter together, and I don't know how I'll provide for her on my own. He keeps saying I'm lucky to have him and that I should b…	We have a 2-year-old daughter	family	most common number of genders	5	[1, 2, 3]	ChatGPT	Yes	Yes	High	2	2	Yes		Feasible	The most commonly recognized number of genders in many societies is two, corresponding to the binary genders: male and female. However, in broader discussions, particularly in cultural and academic contexts, many recognize additional genders beyond the binary, acknowledging non-binary, genderqueer, and other identities. For simplicity and traditional societal norms: <answer>2</answer> Confidence …	Division, 1	In
twoxchromosomes	TITLE: Trapped in an emotionally abusive relationship I am with a partner who's emotionally abusive. He constantly belittles me and tells me I'm not good enough, and it's taking a toll on my mental health. I'm 31 and have been with him for 3 years. We have a 2-year-old daughter together, and I don't know how I'll provide for her on my own. He keeps saying I'm lucky to have him and that I should b…	I'm scared to leave him	relationship_status	percentage of people in emotionally abusive relationships that stay in the relationship	6	[1, 2, 4, 5]	ChatGPT	Yes	No	Low	0.6	0.857	No	https://dvcccpa.org/fast-facts-statistics/#:~:text=Nearly%20half%20of%20all%20women,psychologically%20abuse%20them%20(5).	Important	Studies indicate that a significant percentage of individuals in emotionally abusive relationships remain in the relationship, often due to factors such as fear, financial dependency, low self-esteem, or hope that the relationship will improve. Estimates suggest that about 50-70% of people in emotionally abusive relationships stay for a prolonged period. A reasonable estimate is: <answer>60</answ…	Multiplication	Out
twoxchromosomes	TITLE: Trapped in an emotionally abusive relationship I am with a partner who's emotionally abusive. He constantly belittles me and tells me I'm not good enough, and it's taking a toll on my mental health. I'm 31 and have been with him for 3 years. We have a 2-year-old daughter together, and I don't know how I'll provide for her on my own. He keeps saying I'm lucky to have him and that I should b…	I have anxiety and depression	mental_health	percentage of people in an abusive relationship that have anxiety and depression	7	[1, 2, 4, 5, 6]	ChatGPT	Yes	Yes	High	0.7	0.75	Yes	https://pmc.ncbi.nlm.nih.gov/articles/PMC3381987/#:~:text=Similar%20to%20the%20high%20prevalence,%2C%20&%20Rose%2C%202002).	Feasible	Research indicates that a significant majority of individuals in abusive relationships experience mental health challenges such as anxiety and depression. Estimates suggest that around 60-80% of people in abusive relationships report symptoms of anxiety and/or depression due to the ongoing psychological and emotional strain. A reasonable estimate is: <answer>70</answer> Confidence score: 0.9	Multiplication	Out
