# Supplementary material
Source: ML conference proceedings conference paper supplement (https://openreview.net/forum?id=HMVQ00vabY)
Supplement: supplementary_material [file 11.xlsx]

## Sheet: Ordering 1
Subreddit	Post	Disclosure (Ordering)	Disclosure Category	Query	ID	Conditionally Independent?	Source Used	Succeeded?	Reliable?	Annotator Confidence	Value	Ground Truth	Ground Truth Reliability	Ground Truth Source	Disclosure Type	ChatGPT Response	Operation	Parentheses
mentalhealth	TITLE: my past still haunts me I (32m) live in Germany and have been through some dark times. I've struggled with depression and suicidal thoughts in the past, but I've managed to come out the other side. It's funny how people always say that time heals all wounds, but the truth is, it doesn't. The scars remain, and they still hurt. Sometimes, it feels like the weight of my past is crushing me, a…	I (32m) live in Germany	age_gender	Number of people in Germany aged 25-39	1	[]	ChatGPT	Yes	Yes	High	16000000	16230000	Yes	https://www.statista.com/statistics/454349/population-by-age-group-germany/	Feasible	The estimated number of people in Germany aged 25-39 is approximately 16 million, based on recent demographic data. Confidence Score: 0.85 <answer>16000000</answer>	Multiplication	Begin
mentalhealth	TITLE: my past still haunts me I (32m) live in Germany and have been through some dark times. I've struggled with depression and suicidal thoughts in the past, but I've managed to come out the other side. It's funny how people always say that time heals all wounds, but the truth is, it doesn't. The scars remain, and they still hurt. Sometimes, it feels like the weight of my past is crushing me, a…	I (32m) live in Germany	age_gender	Number of years in the age range 25-39	2	[]	ChatGPT	Yes	Yes	High	15	15	Yes		Feasible	The age range 25-39 includes 15 years. Confidence Score: 1.0 <answer>15</answer>	(Division, 1)	In
mentalhealth	TITLE: my past still haunts me I (32m) live in Germany and have been through some dark times. I've struggled with depression and suicidal thoughts in the past, but I've managed to come out the other side. It's funny how people always say that time heals all wounds, but the truth is, it doesn't. The scars remain, and they still hurt. Sometimes, it feels like the weight of my past is crushing me, a…	I (32m) live in Germany	age_gender	Most commonly identified number of genders	3	[]	ChatGPT	Yes	Yes	High	2	2	Yes		Feasible	The most commonly identified number of genders is 2, typically male and female, based on traditional binary gender classifications. Confidence Score: 0.9 <answer>2</answer>	(Division, 1)	In
mentalhealth	TITLE: my past still haunts me I (32m) live in Germany and have been through some dark times. I've struggled with depression and suicidal thoughts in the past, but I've managed to come out the other side. It's funny how people always say that time heals all wounds, but the truth is, it doesn't. The scars remain, and they still hurt. Sometimes, it feels like the weight of my past is crushing me, a…	I've struggled with depression and suicidal thoughts	mental_health	Percentage of Germany population that has suffered from depression	4	[1,2,3]	ChatGPT	Yes	No	Low	0.08	0.1575	Yes	https://www.sciencedirect.com/science/article/pii/S0165032719325716	Feasible	Approximately 8% of Germany's population has suffered from depression, based on recent mental health studies and surveys. Confidence Score: 0.85 <answer>8</answer>	Multiplication	Out
mentalhealth	TITLE: my past still haunts me I (32m) live in Germany and have been through some dark times. I've struggled with depression and suicidal thoughts in the past, but I've managed to come out the other side. It's funny how people always say that time heals all wounds, but the truth is, it doesn't. The scars remain, and they still hurt. Sometimes, it feels like the weight of my past is crushing me, a…	I've struggled with depression and suicidal thoughts	mental_health	Percentage of people with depression in Germany that suffer from suicidal ideation	5	[1,2,3]	ChatGPT	Yes	Yes	High	0.3	0.3675	Yes	https://www.sciencedirect.com/science/article/pii/S016503272400329X#:~:text=A%20total%20of%20N%20=%2010%2C357,options%20is%20therefore%20highly%20relevant.	Feasible	Approximately 30% of people with depression in Germany suffer from suicidal ideation, based on studies on the mental health impacts of depression. Confidence Score: 0.85 <answer>30</answer>	Multiplication	Out

## Sheet: Ordering 2
Subreddit	Post	Disclosure (Ordering)	Disclosure Category	Query	ID	Conditionally Independent?	Source Used	Succeeded?	Reliable?	Annotator Confidence	Value	Ground Truth	Ground Truth Reliability	Ground Truth Source	Disclosure Type	ChatGPT Response	Operation	Parentheses
mentalhealth	TITLE: my past still haunts me I (32m) live in Germany and have been through some dark times. I've struggled with depression and suicidal thoughts in the past, but I've managed to come out the other side. It's funny how people always say that time heals all wounds, but the truth is, it doesn't. The scars remain, and they still hurt. Sometimes, it feels like the weight of my past is crushing me, a…	I (32m) live in Germany	age_gender	Number of people in Germany aged 25-39	1	[]	ChatGPT	Yes	Yes	High	16000000	16230000	Yes	https://www.statista.com/statistics/454349/population-by-age-group-germany/	Feasible	The estimated number of people in Germany aged 25-39 is approximately 16 million, based on recent demographic data. Confidence Score: 0.85 <answer>16000000</answer>	Multiplication	Begin
mentalhealth	TITLE: my past still haunts me I (32m) live in Germany and have been through some dark times. I've struggled with depression and suicidal thoughts in the past, but I've managed to come out the other side. It's funny how people always say that time heals all wounds, but the truth is, it doesn't. The scars remain, and they still hurt. Sometimes, it feels like the weight of my past is crushing me, a…	I (32m) live in Germany	age_gender	Number of years in the age range 25-39	2	[]	ChatGPT	Yes	Yes	High	15	15	Yes		Feasible	The age range 25-39 includes 15 years. Confidence Score: 1.0 <answer>15</answer>	(Division, 1)	In
mentalhealth	TITLE: my past still haunts me I (32m) live in Germany and have been through some dark times. I've struggled with depression and suicidal thoughts in the past, but I've managed to come out the other side. It's funny how people always say that time heals all wounds, but the truth is, it doesn't. The scars remain, and they still hurt. Sometimes, it feels like the weight of my past is crushing me, a…	I (32m) live in Germany	age_gender	Most commonly identified number of genders	3	[]	ChatGPT	Yes	Yes	High	2	2	Yes		Feasible	The most commonly identified number of genders is 2, typically male and female, based on traditional binary gender classifications. Confidence Score: 0.9 <answer>2</answer>	(Division, 1)	In
mentalhealth	TITLE: my past still haunts me I (32m) live in Germany and have been through some dark times. I've struggled with depression and suicidal thoughts in the past, but I've managed to come out the other side. It's funny how people always say that time heals all wounds, but the truth is, it doesn't. The scars remain, and they still hurt. Sometimes, it feels like the weight of my past is crushing me, a…	I've struggled with depression and suicidal thoughts	mental_health	Percentage of Germany population that has suffered from depression	4	[1,2,3]	ChatGPT	Yes	No	Low	0.08	0.1575	Yes	https://www.sciencedirect.com/science/article/pii/S0165032719325716	Feasible	Approximately 8% of Germany's population has suffered from depression, based on recent mental health studies and surveys. Confidence Score: 0.85 <answer>8</answer>	Multiplication	Out
mentalhealth	TITLE: my past still haunts me I (32m) live in Germany and have been through some dark times. I've struggled with depression and suicidal thoughts in the past, but I've managed to come out the other side. It's funny how people always say that time heals all wounds, but the truth is, it doesn't. The scars remain, and they still hurt. Sometimes, it feels like the weight of my past is crushing me, a…	I've struggled with depression and suicidal thoughts	mental_health	Percentage of people with depression in Germany that suffer from suicidal ideation	5	[1,2,3]	ChatGPT	Yes	Yes	High	0.3	0.3675	Yes	https://www.sciencedirect.com/science/article/pii/S016503272400329X#:~:text=A%20total%20of%20N%20=%2010%2C357,options%20is%20therefore%20highly%20relevant.	Feasible	Approximately 30% of people with depression in Germany suffer from suicidal ideation, based on studies on the mental health impacts of depression. Confidence Score: 0.85 <answer>30</answer>	Multiplication	Out
mentalhealth	TITLE: my past still haunts me I (32m) live in Germany and have been through some dark times. I've struggled with depression and suicidal thoughts in the past, but I've managed to come out the other side. It's funny how people always say that time heals all wounds, but the truth is, it doesn't. The scars remain, and they still hurt. Sometimes, it feels like the weight of my past is crushing me, a…	it feels like the weight of my past is crushing me	mental_health	Percentage of people in Germany with past traumatic experiences	6	[1,2,3,4,5]	ChatGPT	Yes	Yes	High	0.25	0.242	Yes	https://pmc.ncbi.nlm.nih.gov/articles/PMC4149745/#:~:text=Lifetime%20prevalence%20of%20trauma%20by,least%20one%20civilian%20traumatic%20experience.	Feasible	Approximately 25% of people in Germany report having experienced past traumatic events, based on recent studies on mental health and trauma prevalence. Confidence Score: 0.8 <answer>25</answer>	Multiplication	Out
