# Supplementary material
Source: ML conference proceedings conference paper supplement (https://openreview.net/forum?id=HMVQ00vabY)
Supplement: supplementary_material [file 12.xlsx]

## Sheet: Ordering 1
Subreddit	Post	Disclosure (Ordering)	Disclosure Category	Query	ID	Conditionally Independent?	Source Used	Succeeded?	Reliable?	Annotator Confidence	Value	Ground Truth	Ground Truth Reliability	Ground Truth Source	Disclosure Type	ChatGPT Response	Operation	Parentheses
twoxchromosomes	TITLE: My doctor is condescending I had a frustrating experience with my doctor last week. I went in for a checkup and mentioned that I had been experiencing some pain on my left breast. I've had this pain on and off for a few months now, and I've been trying to brush it off as a minor issue, but it's gotten worse. I noticed that the skin on my breast is looking a bit bruised and enlarged, but it…	twoxchromosomes	gender	Number of women in the US	1	[]	ChatGPT	Yes	Yes	High	167000000	168600000	Yes	https://datacommons.org/place/country/USA?utm_medium=explore&mprop=count&popt=Person&cpv=gender,Female&hl=en	Feasible	The estimated number of women in the U.S. is approximately 167 million, based on recent population data indicating women make up around 50.5% of the total U.S. population of about 331 million. Confidence Score: 0.9 <answer>167000000</answer>	Multiplication	Out
twoxchromosomes	TITLE: My doctor is condescending I had a frustrating experience with my doctor last week. I went in for a checkup and mentioned that I had been experiencing some pain on my left breast. I've had this pain on and off for a few months now, and I've been trying to brush it off as a minor issue, but it's gotten worse. I noticed that the skin on my breast is looking a bit bruised and enlarged, but it…	I had been experiencing some pain on my left breast	health	Percentage of women in the US that experience breast pain	2	[]	ChatGPT	Yes	Yes	High	0.7	0.7	Yes	https://www.ncbi.nlm.nih.gov/books/NBK562195/#:~:text=Mastalgia%20is%20considered%20to%20be,30%20percent%20seek%20medical%20help.	Feasible	Approximately 70% of women in the U.S. experience breast pain at some point, based on medical studies related to breast health. Confidence Score: 0.8 <answer>70</answer>	Multiplication	Out
twoxchromosomes	TITLE: My doctor is condescending I had a frustrating experience with my doctor last week. I went in for a checkup and mentioned that I had been experiencing some pain on my left breast. I've had this pain on and off for a few months now, and I've been trying to brush it off as a minor issue, but it's gotten worse. I noticed that the skin on my breast is looking a bit bruised and enlarged, but it…	I went in for a checkup	health	Percentage of women in the US with breast pain that seek medical help	3	[]	ChatGPT	Yes	Yes	High	0.3	0.3	Yes	https://www.ncbi.nlm.nih.gov/books/NBK562195/#:~:text=Mastalgia%20is%20considered%20to%20be,30%20percent%20seek%20medical%20help.	Feasible	Approximately 30% of women in the U.S. with breast pain seek medical help, based on healthcare utilization studies. Confidence Score: 0.8 <answer>30</answer>	Multiplication	Out
twoxchromosomes	TITLE: My doctor is condescending I had a frustrating experience with my doctor last week. I went in for a checkup and mentioned that I had been experiencing some pain on my left breast. I've had this pain on and off for a few months now, and I've been trying to brush it off as a minor issue, but it's gotten worse. I noticed that the skin on my breast is looking a bit bruised and enlarged, but it…	My doctor just dismissed my concerns	personal_experience	Percentage of women in the US that report feeling their doctor has dismissed their concerns	4	[2,3]	ChatGPT	Yes	Yes	High	0.25	0.29	Yes	https://www.kff.org/womens-health-policy/issue-brief/womens-experiences-with-provider-communication-interactions-health-care-settings-findings-from-2022-kff-womens-health-survey/#:~:text=Among%20women%20ages%2018%2D64%20who%20have%20seen,care%20provider%20in%20the%20past%20two%20years:&text=Among%20women%20and%20men%20ages%2018%2D64%20who,compared%20to%2021%%20of%20men%20(Figure%203).	Feasible	Approximately 25% of women in the U.S. report feeling that their doctor has dismissed their concerns, based on surveys on patient-doctor interactions. Confidence Score: 0.8 <answer>25</answer>	Multiplication	Out

## Sheet: Ordering 2
Subreddit	Post	Disclosure (Ordering)	Disclosure Category	Query	ID	Conditionally Independent?	Source Used	Succeeded?	Reliable?	Annotator Confidence	Value	Ground Truth	Ground Truth Reliability	Ground Truth Source	Disclosure Type	ChatGPT Response	Operation	Parentheses
twoxchromosomes	TITLE: My doctor is condescending I had a frustrating experience with my doctor last week. I went in for a checkup and mentioned that I had been experiencing some pain on my left breast. I've had this pain on and off for a few months now, and I've been trying to brush it off as a minor issue, but it's gotten worse. I noticed that the skin on my breast is looking a bit bruised and enlarged, but it…	twoxchromosomes	gender	Number of women in the US	1	[]	ChatGPT	Yes	Yes	High	167000000	168600000	Yes	https://datacommons.org/place/country/USA?utm_medium=explore&mprop=count&popt=Person&cpv=gender,Female&hl=en	Feasible	The estimated number of women in the U.S. is approximately 167 million, based on recent population data indicating women make up around 50.5% of the total U.S. population of about 331 million. Confidence Score: 0.9 <answer>167000000</answer>	Multiplication	Out
twoxchromosomes	TITLE: My doctor is condescending I had a frustrating experience with my doctor last week. I went in for a checkup and mentioned that I had been experiencing some pain on my left breast. I've had this pain on and off for a few months now, and I've been trying to brush it off as a minor issue, but it's gotten worse. I noticed that the skin on my breast is looking a bit bruised and enlarged, but it…	I had been experiencing some pain on my left breast	health	Percentage of women in the US that experience breast pain	2	[]	ChatGPT	Yes	Yes	High	0.7	0.7	Yes	https://www.ncbi.nlm.nih.gov/books/NBK562195/#:~:text=Mastalgia%20is%20considered%20to%20be,30%20percent%20seek%20medical%20help.	Feasible	Approximately 70% of women in the U.S. experience breast pain at some point, based on medical studies related to breast health. Confidence Score: 0.8 <answer>70</answer>	Multiplication	Out
twoxchromosomes	TITLE: My doctor is condescending I had a frustrating experience with my doctor last week. I went in for a checkup and mentioned that I had been experiencing some pain on my left breast. I've had this pain on and off for a few months now, and I've been trying to brush it off as a minor issue, but it's gotten worse. I noticed that the skin on my breast is looking a bit bruised and enlarged, but it…	I went in for a checkup	health	Percentage of women in the US with breast pain that seek medical help	3	[]	ChatGPT	Yes	Yes	High	0.3	0.3	Yes	https://www.ncbi.nlm.nih.gov/books/NBK562195/#:~:text=Mastalgia%20is%20considered%20to%20be,30%20percent%20seek%20medical%20help.	Feasible	Approximately 30% of women in the U.S. with breast pain seek medical help, based on healthcare utilization studies. Confidence Score: 0.8 <answer>30</answer>	Multiplication	Out
twoxchromosomes	TITLE: My doctor is condescending I had a frustrating experience with my doctor last week. I went in for a checkup and mentioned that I had been experiencing some pain on my left breast. I've had this pain on and off for a few months now, and I've been trying to brush it off as a minor issue, but it's gotten worse. I noticed that the skin on my breast is looking a bit bruised and enlarged, but it…	the skin on my breast is looking a bit bruised and enlarged	health	Percentage of women in the US that report experiencing enlarged breasts	4	[2,3]	ChatGPT	Yes	No	Low	0.05	0.2	Yes	https://pubmed.ncbi.nlm.nih.gov/15223108/	Feasible	Approximately 5% of women in the U.S. report experiencing enlarged breasts, often linked to hormonal changes or medical conditions. Confidence Score: 0.75 <answer>5</answer>	Multiplication	Out
twoxchromosomes	TITLE: My doctor is condescending I had a frustrating experience with my doctor last week. I went in for a checkup and mentioned that I had been experiencing some pain on my left breast. I've had this pain on and off for a few months now, and I've been trying to brush it off as a minor issue, but it's gotten worse. I noticed that the skin on my breast is looking a bit bruised and enlarged, but it…	My doctor just dismissed my concerns	personal_experience	Percentage of women in the US that report feeling their doctor has dismissed their concerns	5	[2,3,4]	ChatGPT	Yes	Yes	High	0.25	0.29	Yes	https://www.kff.org/womens-health-policy/issue-brief/womens-experiences-with-provider-communication-interactions-health-care-settings-findings-from-2022-kff-womens-health-survey/#:~:text=Among%20women%20ages%2018%2D64%20who%20have%20seen,care%20provider%20in%20the%20past%20two%20years:&text=Among%20women%20and%20men%20ages%2018%2D64%20who,compared%20to%2021%%20of%20men%20(Figure%203).	Feasible	Approximately 25% of women in the U.S. report feeling that their doctor has dismissed their concerns, based on surveys on patient-doctor interactions. Confidence Score: 0.8 <answer>25</answer>	Multiplication	Out

## Sheet: Ordering 3
Subreddit	Post	Disclosure (Ordering)	Disclosure Category	Query	ID	Conditionally Independent?	Source Used	Succeeded?	Reliable?	Annotator Confidence	Value	Ground Truth	Ground Truth Reliability	Ground Truth Source	Disclosure Type	ChatGPT Response	Operation	Parentheses
twoxchromosomes	TITLE: My doctor is condescending I had a frustrating experience with my doctor last week. I went in for a checkup and mentioned that I had been experiencing some pain on my left breast. I've had this pain on and off for a few months now, and I've been trying to brush it off as a minor issue, but it's gotten worse. I noticed that the skin on my breast is looking a bit bruised and enlarged, but it…	twoxchromosomes	gender	Number of women in the US	1	[]	ChatGPT	Yes	Yes	High	167000000	168600000	Yes	https://datacommons.org/place/country/USA?utm_medium=explore&mprop=count&popt=Person&cpv=gender,Female&hl=en	Feasible	The estimated number of women in the U.S. is approximately 167 million, based on recent population data indicating women make up around 50.5% of the total U.S. population of about 331 million. Confidence Score: 0.9 <answer>167000000</answer>	Multiplication	Out
twoxchromosomes	TITLE: My doctor is condescending I had a frustrating experience with my doctor last week. I went in for a checkup and mentioned that I had been experiencing some pain on my left breast. I've had this pain on and off for a few months now, and I've been trying to brush it off as a minor issue, but it's gotten worse. I noticed that the skin on my breast is looking a bit bruised and enlarged, but it…	I had been experiencing some pain on my left breast	health	Percentage of women in the US that experience breast pain	2	[]	ChatGPT	Yes	Yes	High	0.7	0.7	Yes	https://www.ncbi.nlm.nih.gov/books/NBK562195/#:~:text=Mastalgia%20is%20considered%20to%20be,30%20percent%20seek%20medical%20help.	Feasible	Approximately 70% of women in the U.S. experience breast pain at some point, based on medical studies related to breast health. Confidence Score: 0.8 <answer>70</answer>	Multiplication	Out
twoxchromosomes	TITLE: My doctor is condescending I had a frustrating experience with my doctor last week. I went in for a checkup and mentioned that I had been experiencing some pain on my left breast. I've had this pain on and off for a few months now, and I've been trying to brush it off as a minor issue, but it's gotten worse. I noticed that the skin on my breast is looking a bit bruised and enlarged, but it…	I went in for a checkup	health	Percentage of women in the US with breast pain that seek medical help	3	[]	ChatGPT	Yes	Yes	High	0.3	0.3	Yes	https://www.ncbi.nlm.nih.gov/books/NBK562195/#:~:text=Mastalgia%20is%20considered%20to%20be,30%20percent%20seek%20medical%20help.	Feasible	Approximately 30% of women in the U.S. with breast pain seek medical help, based on healthcare utilization studies. Confidence Score: 0.8 <answer>30</answer>	Multiplication	Out
twoxchromosomes	TITLE: My doctor is condescending I had a frustrating experience with my doctor last week. I went in for a checkup and mentioned that I had been experiencing some pain on my left breast. I've had this pain on and off for a few months now, and I've been trying to brush it off as a minor issue, but it's gotten worse. I noticed that the skin on my breast is looking a bit bruised and enlarged, but it…	My doctor just dismissed my concerns	personal_experience	Percentage of women in the US that report feeling their doctor has dismissed their concerns	4	[2,3]	ChatGPT	Yes	Yes	High	0.25	0.29	Yes	https://www.kff.org/womens-health-policy/issue-brief/womens-experiences-with-provider-communication-interactions-health-care-settings-findings-from-2022-kff-womens-health-survey/#:~:text=Among%20women%20ages%2018%2D64%20who%20have%20seen,care%20provider%20in%20the%20past%20two%20years:&text=Among%20women%20and%20men%20ages%2018%2D64%20who,compared%20to%2021%%20of%20men%20(Figure%203).	Feasible	Approximately 25% of women in the U.S. report feeling that their doctor has dismissed their concerns, based on surveys on patient-doctor interactions. Confidence Score: 0.8 <answer>25</answer>	Multiplication	Out
