# Supplementary material
Source: ML conference proceedings conference paper supplement (https://openreview.net/forum?id=HMVQ00vabY)
Supplement: supplementary_material [file 12.xlsx]

## Sheet: Ordering 1
Subreddit	Post	Disclosure (Ordering)	Disclosure Category	Query	ID	Conditionally Independent?	Source Used	Succeeded?	Reliable?	Annotator Confidence	Value	Ground Truth	Ground Truth Reliability	Ground Truth Source	Disclosure Type	ChatGPT Response	Operation	Parentheses
twoxchromosomes	TITLE: How do I get out of a DV situation without being able to prove physical abuse? I've been in a relationship for 5 years, and it's been getting progressively worse. He's constantly belittling me, making me feel worthless, and controlling my every move. I've tried to talk to him about it, but he says I need to toughen up. Lately, he's been getting more aggressive and anything small thing can …	twoxchromosomes	gender	number of women in the United States	1	[]	ChatGPT	Yes	Yes	High	167640000	168000000	Yes	https://www.census.gov/newsroom/facts-for-features/2024/womens-history-month.html	Feasible	"As of recent estimates, women make up about 50.8% of the U.S. population, which is approximately 330 million people. So, the number of women in the United States is roughly: 330,000,000×0.508≈167,640,000 <answer>167640000</answer> Confidence score: 0.95"	Multiplication	Out
twoxchromosomes	TITLE: How do I get out of a DV situation without being able to prove physical abuse? I've been in a relationship for 5 years, and it's been getting progressively worse. He's constantly belittling me, making me feel worthless, and controlling my every move. I've tried to talk to him about it, but he says I need to toughen up. Lately, he's been getting more aggressive and anything small thing can …	relationship	relationship_status	percentage of people in the US in a relationship	2	[1]	ChatGPT	Yes	No	Medium	0.55	0.68	Yes	https://www.pewresearch.org/internet/2006/02/13/romance-in-america/#:~:text=21%25%20of%20all%20adult%20Americans,actively%20looking%20for%20romantic%20partners.	Feasible	Research and surveys, such as those from the Pew Research Center, suggest that approximately 50-60% of adults in the United States are in a romantic relationship at any given time. This includes those who are married, cohabiting, or dating. A reasonable estimate is: <answer>55</answer> Confidence score: 0.9	Multiplication	Out
twoxchromosomes	TITLE: How do I get out of a DV situation without being able to prove physical abuse? I've been in a relationship for 5 years, and it's been getting progressively worse. He's constantly belittling me, making me feel worthless, and controlling my every move. I've tried to talk to him about it, but he says I need to toughen up. Lately, he's been getting more aggressive and anything small thing can …	DV situation	relationship_status	percentage of women currently experiencing domestic violence	3	[1, 2]	ChatGPT	Yes	No	Medium	0.08	0.29	Yes	https://www.cawc.org/news/who-is-most-affected-by-domestic-violence/#:~:text=The%20Demographics%20of%20Domestic%20Violence&text=Women%20experience%20domestic%20violence%20at,or%20stalking%20by%20a%20partner.	Feasible	Studies on domestic violence suggest that approximately 1 in 4 women (around 25%) will experience domestic violence in their lifetime. However, the percentage of women currently experiencing domestic violence tends to be lower, with estimates around 5-10% of women experiencing intimate partner violence in any given year. A reasonable estimate is: <answer>8</answer> Confidence score: 0.9	Multiplication	Out
twoxchromosomes	TITLE: How do I get out of a DV situation without being able to prove physical abuse? I've been in a relationship for 5 years, and it's been getting progressively worse. He's constantly belittling me, making me feel worthless, and controlling my every move. I've tried to talk to him about it, but he says I need to toughen up. Lately, he's been getting more aggressive and anything small thing can …	trapped	relationship_status	percentage of people in abusive relationships that stay in the relationship	4	[1, 2]	ChatGPT	Yes	No	Low	0.6	0.857	No	https://dvcccpa.org/fast-facts-statistics/#:~:text=Nearly%20half%20of%20all%20women,psychologically%20abuse%20them%20(5).	Important	Studies suggest that a significant percentage of individuals in abusive relationships, including emotional, physical, and psychological abuse, stay in the relationship due to a range of factors such as fear, financial dependency, low self-esteem, and emotional manipulation. Estimates indicate that around 50-70% of people in abusive relationships remain in them for a prolonged period. A reasonable…	Multiplication	Out

## Sheet: Ordering 2
Subreddit	Post	Disclosure (Ordering)	Disclosure Category	Query	ID	Conditionally Independent?	Source Used	Succeeded?	Reliable?	Annotator Confidence	Value	Ground Truth	Ground Truth Reliability	Ground Truth Source	Disclosure Type	ChatGPT Response	Operation	Parentheses
twoxchromosomes	TITLE: How do I get out of a DV situation without being able to prove physical abuse? I've been in a relationship for 5 years, and it's been getting progressively worse. He's constantly belittling me, making me feel worthless, and controlling my every move. I've tried to talk to him about it, but he says I need to toughen up. Lately, he's been getting more aggressive and anything small thing can …	twoxchromosomes	gender	number of women in the United States	1	[]	ChatGPT	Yes	Yes	High	167640000	168000000	Yes	https://www.census.gov/newsroom/facts-for-features/2024/womens-history-month.html	Feasible	"As of recent estimates, women make up about 50.8% of the U.S. population, which is approximately 330 million people. So, the number of women in the United States is roughly: 330,000,000×0.508≈167,640,000 <answer>167640000</answer> Confidence score: 0.95"	Multiplication	Out
twoxchromosomes	TITLE: How do I get out of a DV situation without being able to prove physical abuse? I've been in a relationship for 5 years, and it's been getting progressively worse. He's constantly belittling me, making me feel worthless, and controlling my every move. I've tried to talk to him about it, but he says I need to toughen up. Lately, he's been getting more aggressive and anything small thing can …	relationship for 5 years	relationship_status	percentage of women that have been in a relationship for 5 years or more	2	[1]	ChatGPT	Yes	No	Medium	0.35	0.47	Yes	https://www.pewresearch.org/internet/2006/02/13/romance-in-america/#:~:text=21%25%20of%20all%20adult%20Americans,actively%20looking%20for%20romantic%20partners.	Feasible	Research on relationship duration indicates that a significant portion of individuals in relationships have been together for 5 years or more. According to surveys, approximately 30-40% of women in relationships are in long-term partnerships lasting 5 years or more, depending on factors like age, culture, and relationship type. A reasonable estimate is: <answer>35</answer> Confidence score: 0.85	Multiplication	Out
twoxchromosomes	TITLE: How do I get out of a DV situation without being able to prove physical abuse? I've been in a relationship for 5 years, and it's been getting progressively worse. He's constantly belittling me, making me feel worthless, and controlling my every move. I've tried to talk to him about it, but he says I need to toughen up. Lately, he's been getting more aggressive and anything small thing can …	DV situation	relationship_status	percentage of women currently experiencing domestic violence	3	[1, 2]	ChatGPT	Yes	No	Medium	0.08	0.29	Yes	https://www.cawc.org/news/who-is-most-affected-by-domestic-violence/#:~:text=The%20Demographics%20of%20Domestic%20Violence&text=Women%20experience%20domestic%20violence%20at,or%20stalking%20by%20a%20partner.	Feasible	Studies on domestic violence suggest that approximately 1 in 4 women (around 25%) will experience domestic violence in their lifetime. However, the percentage of women currently experiencing domestic violence tends to be lower, with estimates around 5-10% of women experiencing intimate partner violence in any given year. A reasonable estimate is: <answer>8</answer> Confidence score: 0.9	Multiplication	Out
twoxchromosomes	TITLE: How do I get out of a DV situation without being able to prove physical abuse? I've been in a relationship for 5 years, and it's been getting progressively worse. He's constantly belittling me, making me feel worthless, and controlling my every move. I've tried to talk to him about it, but he says I need to toughen up. Lately, he's been getting more aggressive and anything small thing can …	trapped	relationship_status	percentage of people in abusive relationships that stay in the relationship	4	[1, 2]	ChatGPT	Yes	No	Low	0.6	0.857	No	https://dvcccpa.org/fast-facts-statistics/#:~:text=Nearly%20half%20of%20all%20women,psychologically%20abuse%20them%20(5).	Important	Studies suggest that a significant percentage of individuals in abusive relationships, including emotional, physical, and psychological abuse, stay in the relationship due to a range of factors such as fear, financial dependency, low self-esteem, and emotional manipulation. Estimates indicate that around 50-70% of people in abusive relationships remain in them for a prolonged period. A reasonable…	Multiplication	Out
twoxchromosomes	TITLE: How do I get out of a DV situation without being able to prove physical abuse? I've been in a relationship for 5 years, and it's been getting progressively worse. He's constantly belittling me, making me feel worthless, and controlling my every move. I've tried to talk to him about it, but he says I need to toughen up. Lately, he's been getting more aggressive and anything small thing can …	I'm isolated	mental_health	percentage of domestic violence victims that are isolated from family and friends	5	[1, 2, 4]	ChatGPT	Yes	No	Medium	0.65	0.43	No	https://www.ambreassociates.com/blog/childhood-trauma-adult-loneliness	Important	Research indicates that a significant portion of domestic violence victims experience isolation as part of the abusive dynamic. It is estimated that around 60-70% of domestic violence victims are isolated from their family and friends, often due to manipulation, control tactics, and emotional abuse by the abuser. A reasonable estimate is: <answer>65</answer> Confidence score: 0.85	Multiplication	Out
