# Supplementary material
Source: ML conference proceedings conference paper supplement (https://openreview.net/forum?id=HMVQ00vabY)
Supplement: supplementary_material [file 13.xlsx]

## Sheet: Ordering 1
Subreddit	Post	Disclosure (Ordering)	Disclosure Category	Query	ID	Conditionally Independent?	Source Used	Succeeded?	Reliable?	Annotator Confidence	Value	Ground Truth	Ground Truth Reliability	Ground Truth Source	Disclosure Type	ChatGPT Response	Operation	Parentheses
twoxchromosomes	TITLE: I just got sexually harassed at work today and I'm still fuming I'm 29 years old and just got sexually harassed at work for the first time. I'm still processing everything. I've been working at a startup for a year, and I've always felt pretty comfortable with my colleagues. But today, one of my male coworkers made a comment about my body in front of a group of people. It was a casual comm…	I'm 29 years old	age	Number of people in the US aged 25-29	1	[]	ChatGPT	Yes	Yes	High	23000000	22020000	Yes	https://www.statista.com/statistics/241488/population-of-the-us-by-sex-and-age/	Feasible	The estimated number of people in the U.S. aged 25-29 is approximately 23 million, based on recent demographic data. Confidence Score: 0.85 <answer>23000000</answer>	Multiplication	Begin
twoxchromosomes	TITLE: I just got sexually harassed at work today and I'm still fuming I'm 29 years old and just got sexually harassed at work for the first time. I'm still processing everything. I've been working at a startup for a year, and I've always felt pretty comfortable with my colleagues. But today, one of my male coworkers made a comment about my body in front of a group of people. It was a casual comm…	I'm 29 years old	age	Number of years in the age range 25-29	2	[]	ChatGPT	Yes	Yes	High	5	5	Yes		Feasible	The age range 25-29 includes 5 years. Confidence Score: 1.0 <answer>5</answer>	(Division, 1)	In
twoxchromosomes	TITLE: I just got sexually harassed at work today and I'm still fuming I'm 29 years old and just got sexually harassed at work for the first time. I'm still processing everything. I've been working at a startup for a year, and I've always felt pretty comfortable with my colleagues. But today, one of my male coworkers made a comment about my body in front of a group of people. It was a casual comm…	one of my male coworkers made a comment about my body	personal_experience	Percentage of people in the US aged 25-29 that are women	3	[]	ChatGPT	Yes	Yes	High	0.49	0.4923	Yes	https://www.statista.com/statistics/241488/population-of-the-us-by-sex-and-age/	Feasible	Approximately 49% of people in the U.S. aged 25-29 are women, based on demographic data reflecting the nearly equal gender distribution in this age group. Confidence Score: 0.9 <answer>49</answer>	Multiplication	Out
twoxchromosomes	TITLE: I just got sexually harassed at work today and I'm still fuming I'm 29 years old and just got sexually harassed at work for the first time. I'm still processing everything. I've been working at a startup for a year, and I've always felt pretty comfortable with my colleagues. But today, one of my male coworkers made a comment about my body in front of a group of people. It was a casual comm…	I've been working at a startup	occupation	Percentage of US population that works at a startup	4	[1,2,3]	ChatGPT	Yes	Yes	High	0.02	0.014	Yes	https://www.stlouisfed.org/publications/regional-economist/first-quarter-2020/trends-startups-share-jobs#:~:text=Overall%20Startup%20Employment,the%20District%20as%20a%20whole.&text=One%20striking%20feature%20of%20the,at%20least%20in%20the%20District.	Feasible	Approximately 2% of the U.S. population works at a startup, based on employment data from the startup ecosystem. Confidence Score: 0.8 <answer>2</answer>	Multiplication	Out
twoxchromosomes	TITLE: I just got sexually harassed at work today and I'm still fuming I'm 29 years old and just got sexually harassed at work for the first time. I'm still processing everything. I've been working at a startup for a year, and I've always felt pretty comfortable with my colleagues. But today, one of my male coworkers made a comment about my body in front of a group of people. It was a casual comm…	just got sexually harassed at work for the first time	personal_experience	Percentage of women in the US that have reported sexual harassment at work	5	[1,2,4]	ChatGPT	Yes	Yes	High	0.38	0.38	Yes	https://www.nsvrc.org/ending-sexual-assault-and-harassment-workplace	Feasible	Approximately 38% of women in the U.S. have reported experiencing sexual harassment at work, based on workplace harassment studies and surveys. Confidence Score: 0.85 <answer>38</answer>	Multiplication	Out
twoxchromosomes	TITLE: I just got sexually harassed at work today and I'm still fuming I'm 29 years old and just got sexually harassed at work for the first time. I'm still processing everything. I've been working at a startup for a year, and I've always felt pretty comfortable with my colleagues. But today, one of my male coworkers made a comment about my body in front of a group of people. It was a casual comm…	I've been dealing with depression	mental_health	Percentage of women in the US who have experienced sexual harassment that suffer from depression	6	[1,2,4,5]	ChatGPT	Yes	No	Medium	0.5	0.6	Yes	https://camlawllp.com/dallas-sexual-assault-victim-lawyer/how-does-past-sexual-abuse-affect-a-persons-mental-health/	Feasible	Approximately 50% of women in the U.S. who have experienced sexual harassment report suffering from depression, based on studies examining the psychological impact of harassment. Confidence Score: 0.85 <answer>50</answer>	Multiplication	Out

## Sheet: Ordering 2
Subreddit	Post	Disclosure (Ordering)	Disclosure Category	Query	ID	Conditionally Independent?	Source Used	Succeeded?	Reliable?	Annotator Confidence	Value	Ground Truth	Ground Truth Reliability	Ground Truth Source	Disclosure Type	ChatGPT Response	Operation	Parentheses
twoxchromosomes	TITLE: I just got sexually harassed at work today and I'm still fuming I'm 29 years old and just got sexually harassed at work for the first time. I'm still processing everything. I've been working at a startup for a year, and I've always felt pretty comfortable with my colleagues. But today, one of my male coworkers made a comment about my body in front of a group of people. It was a casual comm…	I'm 29 years old	age	Number of people in the US aged 25-29	1	[]	ChatGPT	Yes	Yes	High	23000000	22020000	Yes	https://www.statista.com/statistics/241488/population-of-the-us-by-sex-and-age/	Feasible	The estimated number of people in the U.S. aged 25-29 is approximately 23 million, based on recent demographic data. Confidence Score: 0.85 <answer>23000000</answer>	Multiplication	Begin
twoxchromosomes	TITLE: I just got sexually harassed at work today and I'm still fuming I'm 29 years old and just got sexually harassed at work for the first time. I'm still processing everything. I've been working at a startup for a year, and I've always felt pretty comfortable with my colleagues. But today, one of my male coworkers made a comment about my body in front of a group of people. It was a casual comm…	I'm 29 years old	age	Number of years in the age range 25-29	2	[]	ChatGPT	Yes	Yes	High	5	5	Yes		Feasible	The age range 25-29 includes 5 years. Confidence Score: 1.0 <answer>5</answer>	(Division, 1)	In
twoxchromosomes	TITLE: I just got sexually harassed at work today and I'm still fuming I'm 29 years old and just got sexually harassed at work for the first time. I'm still processing everything. I've been working at a startup for a year, and I've always felt pretty comfortable with my colleagues. But today, one of my male coworkers made a comment about my body in front of a group of people. It was a casual comm…	one of my male coworkers made a comment about my body	personal_experience	Percentage of people in the US aged 25-29 that are women	3	[]	ChatGPT	Yes	Yes	High	0.49	0.4923	Yes	https://www.statista.com/statistics/241488/population-of-the-us-by-sex-and-age/	Feasible	Approximately 49% of people in the U.S. aged 25-29 are women, based on demographic data reflecting the nearly equal gender distribution in this age group. Confidence Score: 0.9 <answer>49</answer>	Multiplication	Out
twoxchromosomes	TITLE: I just got sexually harassed at work today and I'm still fuming I'm 29 years old and just got sexually harassed at work for the first time. I'm still processing everything. I've been working at a startup for a year, and I've always felt pretty comfortable with my colleagues. But today, one of my male coworkers made a comment about my body in front of a group of people. It was a casual comm…	I've been working at a startup	occupation	Percentage of US population that works at a startup	4	[1,2,3]	ChatGPT	Yes	Yes	High	0.02	0.014	Yes	https://www.stlouisfed.org/publications/regional-economist/first-quarter-2020/trends-startups-share-jobs#:~:text=Overall%20Startup%20Employment,the%20District%20as%20a%20whole.&text=One%20striking%20feature%20of%20the,at%20least%20in%20the%20District.	Feasible	Approximately 2% of the U.S. population works at a startup, based on employment data from the startup ecosystem. Confidence Score: 0.8 <answer>2</answer>	Multiplication	Out
twoxchromosomes	TITLE: I just got sexually harassed at work today and I'm still fuming I'm 29 years old and just got sexually harassed at work for the first time. I'm still processing everything. I've been working at a startup for a year, and I've always felt pretty comfortable with my colleagues. But today, one of my male coworkers made a comment about my body in front of a group of people. It was a casual comm…	just got sexually harassed at work for the first time	personal_experience	Percentage of women in the US that have reported sexual harassment at work	5	[1,2,4]	ChatGPT	Yes	Yes	High	0.38	0.38	Yes	https://www.nsvrc.org/ending-sexual-assault-and-harassment-workplace	Feasible	Approximately 38% of women in the U.S. have reported experiencing sexual harassment at work, based on workplace harassment studies and surveys. Confidence Score: 0.85 <answer>38</answer>	Multiplication	Out
twoxchromosomes	TITLE: I just got sexually harassed at work today and I'm still fuming I'm 29 years old and just got sexually harassed at work for the first time. I'm still processing everything. I've been working at a startup for a year, and I've always felt pretty comfortable with my colleagues. But today, one of my male coworkers made a comment about my body in front of a group of people. It was a casual comm…	one of my male coworkers made a comment about my body	personal_experience	Percentage of sexual harassment incidents in the US that are verbal	6	[1,2,3,4,5]	ChatGPT	Yes	No	Medium	0.6	0.77	Yes	https://www.fightsexualharassment.com/sexual-harassment-statistics.php	Feasible	Approximately 60% of sexual harassment incidents in the U.S. are verbal, based on workplace harassment and behavioral studies. Confidence Score: 0.85 <answer>60</answer>	Multiplication	Out
twoxchromosomes	TITLE: I just got sexually harassed at work today and I'm still fuming I'm 29 years old and just got sexually harassed at work for the first time. I'm still processing everything. I've been working at a startup for a year, and I've always felt pretty comfortable with my colleagues. But today, one of my male coworkers made a comment about my body in front of a group of people. It was a casual comm…	I've been dealing with depression	mental_health	Percentage of women in the US who have experienced sexual harassment that suffer from depression	7	[1,2,4,5,6]	ChatGPT	Yes	No	Medium	0.5	0.6	Yes	https://camlawllp.com/dallas-sexual-assault-victim-lawyer/how-does-past-sexual-abuse-affect-a-persons-mental-health/	Feasible	Approximately 50% of women in the U.S. who have experienced sexual harassment report suffering from depression, based on studies examining the psychological impact of harassment. Confidence Score: 0.85 <answer>50</answer>	Multiplication	Out
