# Supplementary material
Source: ML conference proceedings conference paper supplement (https://openreview.net/forum?id=HMVQ00vabY)
Supplement: supplementary_material [file 13.xlsx]

## Sheet: Ordering 1
Subreddit	Post	Disclosure (Ordering)	Disclosure Category	Query	ID	Conditionally Independent?	Source Used	Succeeded?	Reliable?	Annotator Confidence	Value	Ground Truth	Ground Truth Reliability	Ground Truth Source	Disclosure Type	ChatGPT Response	Operation	Parentheses
twoxchromosomes	TITLE: I just got a medical abortion and I feel so guilty and ashamed. I (24F) am in a committed relationship. I got a medical abortion last month and I feel so guilty and ashamed. I feel like I’m a terrible person. I am still young and I know it was the right choice but I'm sad. I don’t really have very many people to talk to about it as I have no support from my family. My parents are addicts i…	24F	age_gender	number of 24 year old women in the United States	1	[]	ChatGPT	Yes	Yes	High	1650000	2143360	Yes	https://www.census.gov/popclock/data_tables.php?component=pyramid	Feasible	To estimate the number of 24-year-old women in the United States, we can use the total U.S. population of approximately 330 million. Women make up about 50% of the population, and each age group typically represents around 1/100th of the total population. So, the estimated number of 24-year-old women would be: 330,000,000×0.5× 1/100 =1,650,000 <answer>1650000</answer> Confidence score: 0.9	Multiplication	Out
twoxchromosomes	TITLE: I just got a medical abortion and I feel so guilty and ashamed. I (24F) am in a committed relationship. I got a medical abortion last month and I feel so guilty and ashamed. I feel like I’m a terrible person. I am still young and I know it was the right choice but I'm sad. I don’t really have very many people to talk to about it as I have no support from my family. My parents are addicts i…	in a committed relationship	relationship_status	percentage of people in the US in a relationship	2	[1]	ChatGPT	Yes	No	Medium	0.55	0.68	Yes	https://www.pewresearch.org/internet/2006/02/13/romance-in-america/#:~:text=21%25%20of%20all%20adult%20Americans,actively%20looking%20for%20romantic%20partners.	Feasible	Research and surveys, such as those from the Pew Research Center, suggest that approximately 50-60% of adults in the United States are in a romantic relationship at any given time. This includes those who are married, cohabiting, or dating. A reasonable estimate is: <answer>55</answer> Confidence score: 0.9	Multiplication	Out
twoxchromosomes	TITLE: I just got a medical abortion and I feel so guilty and ashamed. I (24F) am in a committed relationship. I got a medical abortion last month and I feel so guilty and ashamed. I feel like I’m a terrible person. I am still young and I know it was the right choice but I'm sad. I don’t really have very many people to talk to about it as I have no support from my family. My parents are addicts i…	I got a medical abortion last month	reproductive_health	percentage of women that get a medical abortion in one year	3	[1, 2]	ChatGPT	Yes	Yes	High	0.025	0.019	Yes	https://www.cdc.gov/mmwr/volumes/71/ss/ss7110a1.htm	Feasible	In the United States, approximately 25-30% of women who have an abortion choose a medical abortion, which involves medication rather than surgery. However, when considering the percentage of all women who get a medical abortion in a given year (as opposed to just those who have abortions), the number is much smaller, likely around 2-3% of the total female population in any given year. A reasonabl…	Multiplication	Out
twoxchromosomes	TITLE: I just got a medical abortion and I feel so guilty and ashamed. I (24F) am in a committed relationship. I got a medical abortion last month and I feel so guilty and ashamed. I feel like I’m a terrible person. I am still young and I know it was the right choice but I'm sad. I don’t really have very many people to talk to about it as I have no support from my family. My parents are addicts i…	I feel so guilty and ashamed	mental_health	percentage of women that got an abortion that feel sad	4	[1, 2]	ChatGPT	Yes	No	High	0.35	0.74	Yes	https://pmc.ncbi.nlm.nih.gov/articles/PMC10257365/#:~:text=But%20in%20a%20separate%20analysis,%2D43%25)%20%5B4%5D.	Feasible	Studies suggest that a significant portion of women who have had an abortion experience feelings of sadness, though the degree of sadness varies. Research indicates that around 30-40% of women report feeling sad after their abortion, with some experiencing this emotion as part of a broader range of emotional responses, such as relief or guilt. A reasonable estimate is: <answer>35</answer> Confide…	Multiplication	Out
twoxchromosomes	TITLE: I just got a medical abortion and I feel so guilty and ashamed. I (24F) am in a committed relationship. I got a medical abortion last month and I feel so guilty and ashamed. I feel like I’m a terrible person. I am still young and I know it was the right choice but I'm sad. I don’t really have very many people to talk to about it as I have no support from my family. My parents are addicts i…	My parents are addicts	family	percentage of people in the US that have lived with parents who have illicit substance abuse	5	[1, 2, 3, 4]	ChatGPT	Yes	No	Medium	0.12	0.0286	Yes	https://www.samhsa.gov/data/sites/default/files/report_3223/ShortReport-3223.html	Feasible	Studies and surveys on substance abuse suggest that approximately 10-15% of people in the United States have lived with a parent who struggled with illicit substance abuse. This percentage can vary based on factors such as age, region, and socioeconomic background. A reasonable estimate is: <answer>12</answer> Confidence score: 0.85	Multiplication	Out
twoxchromosomes	TITLE: I just got a medical abortion and I feel so guilty and ashamed. I (24F) am in a committed relationship. I got a medical abortion last month and I feel so guilty and ashamed. I feel like I’m a terrible person. I am still young and I know it was the right choice but I'm sad. I don’t really have very many people to talk to about it as I have no support from my family. My parents are addicts i…	My childhood was terrifying and neglectful and abuse filled	personal_experience	percentage of parents with illicit substance abuse that abuse and neglect their children	6	[1, 2, 3, 4]	ChatGPT	Yes	No	High	0.6	0.276	Yes	https://pmc.ncbi.nlm.nih.gov/articles/PMC3905472/	Feasible	Research suggests that a significant portion of parents with illicit substance abuse issues also engage in child abuse and neglect. Studies estimate that between 40-80% of parents with substance use disorders are involved in some form of child abuse or neglect, as substance abuse can impair judgment, caregiving abilities, and emotional regulation. A reasonable estimate is: <answer>60</answer> Con…	Multiplication	Out
twoxchromosomes	TITLE: I just got a medical abortion and I feel so guilty and ashamed. I (24F) am in a committed relationship. I got a medical abortion last month and I feel so guilty and ashamed. I feel like I’m a terrible person. I am still young and I know it was the right choice but I'm sad. I don’t really have very many people to talk to about it as I have no support from my family. My parents are addicts i…	I struggle now	mental_health	percentage of child abuse victims that develop mental health conditions	7	[1, 2, 3, 4, 5]	ChatGPT	Yes	Yes	Low	0.65	0.6772	No	https://www.sciencedirect.com/science/article/pii/S0001691823000136	Feasible	Research indicates that a significant percentage of children who experience abuse develop mental health conditions later in life. Estimates suggest that approximately 60-70% of child abuse victims experience some form of mental health issue, including anxiety, depression, PTSD, and other emotional or psychological disorders, as a result of their traumatic experiences. A reasonable estimate is: <a…	Multiplication	Out

## Sheet: Ordering 2
Subreddit	Post	Disclosure (Ordering)	Disclosure Category	Query	ID	Conditionally Independent?	Source Used	Succeeded?	Reliable?	Annotator Confidence	Value	Ground Truth	Ground Truth Reliability	Ground Truth Source	Disclosure Type	ChatGPT Response	Operation	Parentheses
twoxchromosomes	TITLE: I just got a medical abortion and I feel so guilty and ashamed. I (24F) am in a committed relationship. I got a medical abortion last month and I feel so guilty and ashamed. I feel like I’m a terrible person. I am still young and I know it was the right choice but I'm sad. I don’t really have very many people to talk to about it as I have no support from my family. My parents are addicts i…	24F	age_gender	number of 24 year old women in the United States	1	[]	ChatGPT	Yes	Yes	High	1650000	2143360	Yes	https://www.census.gov/popclock/data_tables.php?component=pyramid	Feasible	To estimate the number of 24-year-old women in the United States, we can use the total U.S. population of approximately 330 million. Women make up about 50% of the population, and each age group typically represents around 1/100th of the total population. So, the estimated number of 24-year-old women would be: 330,000,000×0.5× 1/100 =1,650,000 <answer>1650000</answer> Confidence score: 0.9	Multiplication	Out
twoxchromosomes	TITLE: I just got a medical abortion and I feel so guilty and ashamed. I (24F) am in a committed relationship. I got a medical abortion last month and I feel so guilty and ashamed. I feel like I’m a terrible person. I am still young and I know it was the right choice but I'm sad. I don’t really have very many people to talk to about it as I have no support from my family. My parents are addicts i…	in a committed relationship	relationship_status	percentage of people in the US in a relationship	2	[1]	ChatGPT	Yes	No	Medium	0.55	0.68	Yes	https://www.pewresearch.org/internet/2006/02/13/romance-in-america/#:~:text=21%25%20of%20all%20adult%20Americans,actively%20looking%20for%20romantic%20partners.	Feasible	Research and surveys, such as those from the Pew Research Center, suggest that approximately 50-60% of adults in the United States are in a romantic relationship at any given time. This includes those who are married, cohabiting, or dating. A reasonable estimate is: <answer>55</answer> Confidence score: 0.9	Multiplication	Out
twoxchromosomes	TITLE: I just got a medical abortion and I feel so guilty and ashamed. I (24F) am in a committed relationship. I got a medical abortion last month and I feel so guilty and ashamed. I feel like I’m a terrible person. I am still young and I know it was the right choice but I'm sad. I don’t really have very many people to talk to about it as I have no support from my family. My parents are addicts i…	I got a medical abortion last month	reproductive_health	percentage of women that get a medical abortion in one year	3	[1, 2]	ChatGPT	Yes	Yes	High	0.025	0.019	Yes	https://www.cdc.gov/mmwr/volumes/71/ss/ss7110a1.htm	Feasible	In the United States, approximately 25-30% of women who have an abortion choose a medical abortion, which involves medication rather than surgery. However, when considering the percentage of all women who get a medical abortion in a given year (as opposed to just those who have abortions), the number is much smaller, likely around 2-3% of the total female population in any given year. A reasonabl…	Multiplication	Out
twoxchromosomes	TITLE: I just got a medical abortion and I feel so guilty and ashamed. I (24F) am in a committed relationship. I got a medical abortion last month and I feel so guilty and ashamed. I feel like I’m a terrible person. I am still young and I know it was the right choice but I'm sad. I don’t really have very many people to talk to about it as I have no support from my family. My parents are addicts i…	I feel so guilty and ashamed	mental_health	percentage of women that got an abortion that feel guilty or ashamed	4	[1, 2]	ChatGPT	Yes	No	High	0.35	0.63	Yes	https://pmc.ncbi.nlm.nih.gov/articles/PMC10257365/#:~:text=But%20in%20a%20separate%20analysis,%2D43%25)%20%5B4%5D.	Feasible	Studies suggest that a significant portion of women who have had an abortion experience feelings of guilt or shame, particularly due to societal stigma and personal beliefs. Estimates indicate that around 30-40% of women report feeling guilt or shame after an abortion, though these emotions can vary greatly depending on individual circumstances and support systems. A reasonable estimate is: <answ…	Multiplication	Out
twoxchromosomes	TITLE: I just got a medical abortion and I feel so guilty and ashamed. I (24F) am in a committed relationship. I got a medical abortion last month and I feel so guilty and ashamed. I feel like I’m a terrible person. I am still young and I know it was the right choice but I'm sad. I don’t really have very many people to talk to about it as I have no support from my family. My parents are addicts i…	My parents are addicts	family	percentage of people in the US that have lived with parents who are drug addicts	5	[1, 2, 3, 4]	ChatGPT	Yes	Yes	High	0.12	0.125	No	https://www.samhsa.gov/newsroom/press-announcements/20170824	Feasible	Research on childhood experiences and parental substance abuse suggests that around 10-15% of people in the United States have lived with a parent who struggled with drug addiction. The prevalence can vary depending on factors such as age, region, and socioeconomic background. A reasonable estimate is: <answer>12</answer> Confidence score: 0.85	Multiplication	Out
twoxchromosomes	TITLE: I just got a medical abortion and I feel so guilty and ashamed. I (24F) am in a committed relationship. I got a medical abortion last month and I feel so guilty and ashamed. I feel like I’m a terrible person. I am still young and I know it was the right choice but I'm sad. I don’t really have very many people to talk to about it as I have no support from my family. My parents are addicts i…	My childhood was terrifying and neglectful and abuse filled	personal_experience	percentage of parents with illicit substance abuse that abuse and neglect their children	6	[1, 2, 3, 4]	ChatGPT	Yes	No	High	0.6	0.276	Yes	https://pmc.ncbi.nlm.nih.gov/articles/PMC3905472/	Feasible	Research suggests that a significant portion of parents with illicit substance abuse issues also engage in child abuse and neglect. Studies estimate that between 40-80% of parents with substance use disorders are involved in some form of child abuse or neglect, as substance abuse can impair judgment, caregiving abilities, and emotional regulation. A reasonable estimate is: <answer>60</answer> Con…	Multiplication	Out
twoxchromosomes	TITLE: I just got a medical abortion and I feel so guilty and ashamed. I (24F) am in a committed relationship. I got a medical abortion last month and I feel so guilty and ashamed. I feel like I’m a terrible person. I am still young and I know it was the right choice but I'm sad. I don’t really have very many people to talk to about it as I have no support from my family. My parents are addicts i…	I struggle now	mental_health	percentage of child abuse victims that develop mental health conditions	7	[1, 2, 3, 4, 5]	ChatGPT	Yes	Yes	Low	0.65	0.6772	No	https://www.sciencedirect.com/science/article/pii/S0001691823000136	Feasible	Research indicates that a significant percentage of children who experience abuse develop mental health conditions later in life. Estimates suggest that approximately 60-70% of child abuse victims experience some form of mental health issue, including anxiety, depression, PTSD, and other emotional or psychological disorders, as a result of their traumatic experiences. A reasonable estimate is: <a…	Multiplication	Out
