# Supplementary material
Source: ML conference proceedings conference paper supplement (https://openreview.net/forum?id=HMVQ00vabY)
Supplement: supplementary_material [file 14.xlsx]

## Sheet: Ordering 1
Subreddit	Post	Disclosure (Ordering)	Disclosure Category	Query	ID	Conditionally Independent?	Source Used	Succeeded?	Reliable?	Annotator Confidence	Value	Ground Truth	Ground Truth Reliability	Ground Truth Source	Disclosure Type	ChatGPT Response	Operation	Parentheses
twoxchromosomes	TITLE: I am furious after being catcalled by a stranger I’m a 24 year old non-binary person, and I was walking home from class today when a middle-aged man yelled out to me from across the street. I immediately felt my anxiety spike and my heart racing. I tried to ignore him and keep walking, but he continued to follow me, saying that I “look so sexy.” I finally had to quicken my pace to get away…	non-binary person	gender	Number of non-binary people in the US	1	[]	ChatGPT	Yes	Yes	High	1200000	1200000	Yes	https://williamsinstitute.law.ucla.edu/press/lgbtq-nonbinary-press-release/#:~:text=An%20estimated%2011%25%20of%20LGBTQ,at%20UCLA%20School%20of%20Law.	Feasible	The estimated number of non-binary people in the U.S. is approximately 1.2 million, based on recent surveys and studies on gender identity. Confidence Score: 0.8 <answer>1200000</answer>	Multiplication	Out
twoxchromosomes	TITLE: I am furious after being catcalled by a stranger I’m a 24 year old non-binary person, and I was walking home from class today when a middle-aged man yelled out to me from across the street. I immediately felt my anxiety spike and my heart racing. I tried to ignore him and keep walking, but he continued to follow me, saying that I “look so sexy.” I finally had to quicken my pace to get away…	I’m a 24 year old	age	Percentage of non-binary people in the US that are ages 18-30	2	[]	ChatGPT	Yes	No	Low	0.6	0.75	Yes	https://thehill.com/changing-america/3811406-new-studies-find-millions-of-young-nonbinary-and-transgender-americans/#:~:text=One%20landmark%20study%20found%201.2,that%20older%20Americans%20have%20not.	Feasible	Approximately 60% of non-binary people in the U.S. are estimated to be between the ages of 18-30, based on recent surveys of gender identity and age demographics. Confidence Score: 0.8 <answer>60</answer>	Multiplication	Begin
twoxchromosomes	TITLE: I am furious after being catcalled by a stranger I’m a 24 year old non-binary person, and I was walking home from class today when a middle-aged man yelled out to me from across the street. I immediately felt my anxiety spike and my heart racing. I tried to ignore him and keep walking, but he continued to follow me, saying that I “look so sexy.” I finally had to quicken my pace to get away…	I’m a 24 year old	age	Number of years in the age range 18-30	3	[]	ChatGPT	Yes	Yes	High	13	13	Yes		Feasible	The age range 18-30 includes 13 years. Confidence Score: 1.0 <answer>13</answer>	(Division, 1)	In
twoxchromosomes	TITLE: I am furious after being catcalled by a stranger I’m a 24 year old non-binary person, and I was walking home from class today when a middle-aged man yelled out to me from across the street. I immediately felt my anxiety spike and my heart racing. I tried to ignore him and keep walking, but he continued to follow me, saying that I “look so sexy.” I finally had to quicken my pace to get away…	being catcalled by a stranger	personal_experience	Percentage of women in the US that have experienced catcalling	4	[1,2,3]	ChatGPT	Yes	Yes	High	0.65	0.71	Yes	https://stopstreetharassment.org/our-work/nationalstudy/shage/	Feasible	Approximately 65% of women in the U.S. have experienced catcalling, based on surveys addressing street harassment and related behaviors. Confidence Score: 0.85 <answer>65</answer>	Multiplication	Out

## Sheet: Ordering 2
Subreddit	Post	Disclosure (Ordering)	Disclosure Category	Query	ID	Conditionally Independent?	Source Used	Succeeded?	Reliable?	Annotator Confidence	Value	Ground Truth	Ground Truth Reliability	Ground Truth Source	Disclosure Type	ChatGPT Response	Operation	Parentheses
twoxchromosomes	TITLE: I am furious after being catcalled by a stranger I’m a 24 year old non-binary person, and I was walking home from class today when a middle-aged man yelled out to me from across the street. I immediately felt my anxiety spike and my heart racing. I tried to ignore him and keep walking, but he continued to follow me, saying that I “look so sexy.” I finally had to quicken my pace to get away…	non-binary person	gender	Number of non-binary people in the US	1	[]	ChatGPT	Yes	Yes	High	1200000	1200000	Yes	https://williamsinstitute.law.ucla.edu/press/lgbtq-nonbinary-press-release/#:~:text=An%20estimated%2011%25%20of%20LGBTQ,at%20UCLA%20School%20of%20Law.	Feasible	The estimated number of non-binary people in the U.S. is approximately 1.2 million, based on recent surveys and studies on gender identity. Confidence Score: 0.8 <answer>1200000</answer>	Multiplication	Out
twoxchromosomes	TITLE: I am furious after being catcalled by a stranger I’m a 24 year old non-binary person, and I was walking home from class today when a middle-aged man yelled out to me from across the street. I immediately felt my anxiety spike and my heart racing. I tried to ignore him and keep walking, but he continued to follow me, saying that I “look so sexy.” I finally had to quicken my pace to get away…	I’m a 24 year old	age	Percentage of non-binary people in the US that are ages 18-30	2	[]	ChatGPT	Yes	No	Low	0.6	0.75	Yes	https://thehill.com/changing-america/3811406-new-studies-find-millions-of-young-nonbinary-and-transgender-americans/#:~:text=One%20landmark%20study%20found%201.2,that%20older%20Americans%20have%20not.	Feasible	Approximately 60% of non-binary people in the U.S. are estimated to be between the ages of 18-30, based on recent surveys of gender identity and age demographics. Confidence Score: 0.8 <answer>60</answer>	Multiplication	Begin
twoxchromosomes	TITLE: I am furious after being catcalled by a stranger I’m a 24 year old non-binary person, and I was walking home from class today when a middle-aged man yelled out to me from across the street. I immediately felt my anxiety spike and my heart racing. I tried to ignore him and keep walking, but he continued to follow me, saying that I “look so sexy.” I finally had to quicken my pace to get away…	I’m a 24 year old	age	Number of years in the age range 18-30	3	[]	ChatGPT	Yes	Yes	High	13	13	Yes		Feasible	The age range 18-30 includes 13 years. Confidence Score: 1.0 <answer>13</answer>	(Division, 1)	In
twoxchromosomes	TITLE: I am furious after being catcalled by a stranger I’m a 24 year old non-binary person, and I was walking home from class today when a middle-aged man yelled out to me from across the street. I immediately felt my anxiety spike and my heart racing. I tried to ignore him and keep walking, but he continued to follow me, saying that I “look so sexy.” I finally had to quicken my pace to get away…	I am furious after being catcalled by a stranger	personal_experience	Percentage of non-binary people in the US that have experienced sexual harassment	4	[2,3]	ChatGPT	Yes	No	Medium	0.58	0.41	Yes	https://williamsinstitute.law.ucla.edu/publications/nonbinary-lgbtq-adults-us/	Feasible	Approximately 58% of nonbinary people in the U.S. have experienced sexual harassment, based on surveys addressing harassment and discrimination among gender-diverse populations. Confidence Score: 0.8 <answer>58</answer>	Multiplication	Out
