# Supplementary material
Source: ML conference proceedings conference paper supplement (https://openreview.net/forum?id=HMVQ00vabY)
Supplement: supplementary_material [file 14.xlsx]

## Sheet: Ordering 1
Subreddit	Post	Disclosure (Ordering)	Disclosure Category	Query	ID	Conditionally Independent?	Source Used	Succeeded?	Reliable?	Annotator Confidence	Value	Ground Truth	Ground Truth Reliability	Ground Truth Source	Disclosure Type	ChatGPT Response	Operation	Parentheses
twoxchromosomes	TITLE: Just missed my period I (18F) have been on the birth control pill for 3 years and ive never been late. But this month i'm a week late and i'm freaking out. I take the pill every day, no misses, and have been tracking my period on an app. I don't know if i'm pregnant or if the pill isn't working. I also have mood swings and my breast feels tender, but idk if that's PMS or something else. Wh…	18f	age_gender	number of 18 year old women in the United States	1	[]	ChatGPT	Yes	Yes	High	1650000	2143360	Yes	https://www.census.gov/popclock/data_tables.php?component=pyramid	Feasible	To estimate the number of 18-year-old women in the United States, we use the total U.S. population of approximately 330 million. Women make up about 50% of the population, and each year of age group represents around 1/100th of the total population. 330,000,000×0.5×1/100 = 1,650,000 <answer>1650000</answer> Confidence score: 0.9	Multiplication	Out
twoxchromosomes	TITLE: Just missed my period I (18F) have been on the birth control pill for 3 years and ive never been late. But this month i'm a week late and i'm freaking out. I take the pill every day, no misses, and have been tracking my period on an app. I don't know if i'm pregnant or if the pill isn't working. I also have mood swings and my breast feels tender, but idk if that's PMS or something else. Wh…	have been on the birth control pill for 3 years	health	percentage of 18 year old women that are on the birth control pill	2	[]	ChatGPT	Yes	Yes	High	0.25	0.195	Yes	https://www.cdc.gov/nchs/products/databriefs/db388.htm#:~:text=currently%20using%20contraception.-,In%202017%E2%80%932019%2C%2065.3%25%20of%20women%20aged%2015%E2%80%93,(69.1%25%E2%80%9371.3%25).	Feasible	Studies indicate that around 20-30% of 18-year-old women in the United States use the birth control pill. The exact percentage can vary based on factors such as access to healthcare, education, and socioeconomic status. A reasonable estimate is: <answer>25</answer> Confidence score: 0.85	Multiplication	Out
twoxchromosomes	TITLE: Just missed my period I (18F) have been on the birth control pill for 3 years and ive never been late. But this month i'm a week late and i'm freaking out. I take the pill every day, no misses, and have been tracking my period on an app. I don't know if i'm pregnant or if the pill isn't working. I also have mood swings and my breast feels tender, but idk if that's PMS or something else. Wh…	missed my period	health	percentage of women on the birth control pill that miss their periods	3	[1]	ChatGPT	Yes	No	Medium	0.25	0.1	No	https://www.medicinenet.com/why_did_i_miss_my_period_on_birth_control/article.htm	Important	Among women who use the birth control pill, missing periods (amenorrhea) is a relatively common side effect, particularly with continuous or extended-cycle pills designed to suppress menstruation. Studies suggest that approximately 20-30% of women on the birth control pill may experience missed periods. A reasonable estimate is: <answer>25</answer> Confidence score: 0.85	Multiplication	Out
twoxchromosomes	TITLE: Just missed my period I (18F) have been on the birth control pill for 3 years and ive never been late. But this month i'm a week late and i'm freaking out. I take the pill every day, no misses, and have been tracking my period on an app. I don't know if i'm pregnant or if the pill isn't working. I also have mood swings and my breast feels tender, but idk if that's PMS or something else. Wh…	mood swings	health	percentage of women that have mood swings or other PMS symptoms	4	[1, 2, 3]	ChatGPT	Yes	No	Medium	0.8	0.9	Yes	https://www.healthline.com/health/mood-swings-in-women#causes	Feasible	Research indicates that a significant portion of women experience mood swings or other premenstrual syndrome (PMS) symptoms. Studies estimate that around 75-90% of women of reproductive age report at least one PMS symptom, including mood swings, bloating, or irritability. For severe symptoms, such as those associated with premenstrual dysphoric disorder (PMDD), the percentage is much lower, at ar…	Multiplication	Out
twoxchromosomes	TITLE: Just missed my period I (18F) have been on the birth control pill for 3 years and ive never been late. But this month i'm a week late and i'm freaking out. I take the pill every day, no misses, and have been tracking my period on an app. I don't know if i'm pregnant or if the pill isn't working. I also have mood swings and my breast feels tender, but idk if that's PMS or something else. Wh…	my breast feels tender	health	percentage of women that experience breast tenderness	5	[1, 2, 3, 4]	ChatGPT	Yes	No	High	0.6	0.7	Yes	https://pmc.ncbi.nlm.nih.gov/articles/PMC4200534/#:~:text=Breast%20pain%20may%20be%20cyclical,spontaneously%20in%20half%20of%20women.	Feasible	Breast tenderness, also known as mastalgia, is a common symptom experienced by many women, particularly related to hormonal changes during menstrual cycles, pregnancy, or other conditions. Studies estimate that approximately 50-70% of women experience breast tenderness at some point in their lives. A reasonable estimate is: <answer>60</answer> Confidence score: 0.85	Multiplication	Out

## Sheet: Ordering 2
Subreddit	Post	Disclosure (Ordering)	Disclosure Category	Query	ID	Conditionally Independent?	Source Used	Succeeded?	Reliable?	Annotator Confidence	Value	Ground Truth	Ground Truth Reliability	Ground Truth Source	Disclosure Type	ChatGPT Response	Operation	Parentheses
twoxchromosomes	TITLE: Just missed my period I (18F) have been on the birth control pill for 3 years and ive never been late. But this month i'm a week late and i'm freaking out. I take the pill every day, no misses, and have been tracking my period on an app. I don't know if i'm pregnant or if the pill isn't working. I also have mood swings and my breast feels tender, but idk if that's PMS or something else. Wh…	18f	age_gender	number of 18 year old women in the United States	1	[]	ChatGPT	Yes	Yes	High	1650000	2143360	Yes	https://www.census.gov/popclock/data_tables.php?component=pyramid	Feasible	To estimate the number of 18-year-old women in the United States, we use the total U.S. population of approximately 330 million. Women make up about 50% of the population, and each year of age group represents around 1/100th of the total population. 330,000,000×0.5×1/100 = 1,650,000 <answer>1650000</answer> Confidence score: 0.9	Multiplication	Out
twoxchromosomes	TITLE: Just missed my period I (18F) have been on the birth control pill for 3 years and ive never been late. But this month i'm a week late and i'm freaking out. I take the pill every day, no misses, and have been tracking my period on an app. I don't know if i'm pregnant or if the pill isn't working. I also have mood swings and my breast feels tender, but idk if that's PMS or something else. Wh…	have been on the birth control pill	health	percentage of 18 year old women that are on the birth control pill	2	[]	ChatGPT	Yes	Yes	High	0.25	0.195	Yes	https://www.cdc.gov/nchs/products/databriefs/db388.htm#:~:text=currently%20using%20contraception.-,In%202017%E2%80%932019%2C%2065.3%25%20of%20women%20aged%2015%E2%80%93,(69.1%25%E2%80%9371.3%25).	Feasible	Studies indicate that around 20-30% of 18-year-old women in the United States use the birth control pill. The exact percentage can vary based on factors such as access to healthcare, education, and socioeconomic status. A reasonable estimate is: <answer>25</answer> Confidence score: 0.85	Multiplication	Out
twoxchromosomes	TITLE: Just missed my period I (18F) have been on the birth control pill for 3 years and ive never been late. But this month i'm a week late and i'm freaking out. I take the pill every day, no misses, and have been tracking my period on an app. I don't know if i'm pregnant or if the pill isn't working. I also have mood swings and my breast feels tender, but idk if that's PMS or something else. Wh…	missed my period	health	percentage of women on the birth control pill that miss their periods	3	[1]	ChatGPT	Yes	No	Medium	0.25	0.1	No	https://www.medicinenet.com/why_did_i_miss_my_period_on_birth_control/article.htm	Important	Among women who use the birth control pill, missing periods (amenorrhea) is a relatively common side effect, particularly with continuous or extended-cycle pills designed to suppress menstruation. Studies suggest that approximately 20-30% of women on the birth control pill may experience missed periods. A reasonable estimate is: <answer>25</answer> Confidence score: 0.85	Multiplication	Out
twoxchromosomes	TITLE: Just missed my period I (18F) have been on the birth control pill for 3 years and ive never been late. But this month i'm a week late and i'm freaking out. I take the pill every day, no misses, and have been tracking my period on an app. I don't know if i'm pregnant or if the pill isn't working. I also have mood swings and my breast feels tender, but idk if that's PMS or something else. Wh…	mood swings and my breast feels tender, but idk if that's PMS or something	health	percentage of women that have mood swings or other PMS symptoms	4	[1, 2, 3]	ChatGPT	Yes	No	Medium	0.8	0.9	Yes	https://www.healthline.com/health/mood-swings-in-women#causes	Feasible	Research indicates that a significant portion of women experience mood swings or other premenstrual syndrome (PMS) symptoms. Studies estimate that around 75-90% of women of reproductive age report at least one PMS symptom, including mood swings, bloating, or irritability. For severe symptoms, such as those associated with premenstrual dysphoric disorder (PMDD), the percentage is much lower, at ar…	Multiplication	Out
