# Supplementary material
Source: ML conference proceedings conference paper supplement (https://openreview.net/forum?id=HMVQ00vabY)
Supplement: supplementary_material [file 15.xlsx]

## Sheet: Ordering 1
Subreddit	Post	Disclosure (Ordering)	Disclosure Category	Query	ID	Conditionally Independent?	Source Used	Succeeded?	Reliable?	Annotator Confidence	Value	Ground Truth	Ground Truth Reliability	Ground Truth Source	Disclosure Type	ChatGPT Response	Operation	Parentheses
chapmanuniversity	TITLE: looking for roommates i am currently studying at CSUF for a masters in computer science. been living in a small apartment with like 2 other dudes that are graduating this year, so i need some roomies ASAP! i am a pretty chill guy and like to have downtime for myself. im not a big party animal, but i do enjoy having a couple of drinks with friends every now and then. im looking for someone …	i am currently studying at CSUF for a masters in computer science	education	Number of graduate students at California State University, Fullerton	1	[]	ChatGPT	Yes	Yes	High	5000	5019	Yes	https://www.fullerton.edu/data/_resources/pdfs/facts/CSUF%20Facts%20Fall%202023.pdf	Feasible	California State University, Fullerton typically has around 5,000 graduate students, based on recent enrollment data. Confidence Score: 0.9 <answer>5000</answer>	Multiplication	Out
chapmanuniversity	TITLE: looking for roommates i am currently studying at CSUF for a masters in computer science. been living in a small apartment with like 2 other dudes that are graduating this year, so i need some roomies ASAP! i am a pretty chill guy and like to have downtime for myself. im not a big party animal, but i do enjoy having a couple of drinks with friends every now and then. im looking for someone …	i am a pretty chill guy	gender	Percentage of students at California State University, Fullerton that are male	2	[1]	ChatGPT	Yes	Yes	High	0.42	0.426	Yes	https://www.fullerton.edu/data/_resources/pdfs/facts/CSUF%20Facts%20Fall%202023.pdf	Feasible	As of Fall 2023, male students comprised 42% of the student population at California State University, Fullerton. This indicates that 58% of the students were female. These figures are consistent with data from previous years, reflecting a stable gender distribution at the university.	Multiplication	Out
chapmanuniversity	TITLE: looking for roommates i am currently studying at CSUF for a masters in computer science. been living in a small apartment with like 2 other dudes that are graduating this year, so i need some roomies ASAP! i am a pretty chill guy and like to have downtime for myself. im not a big party animal, but i do enjoy having a couple of drinks with friends every now and then. im looking for someone …	i am currently studying at CSUF for a masters in computer science	education	Percentage of masters students at California State University, Fullerton that are studying computer science	3	[1,2]	ChatGPT	Yes	Yes	High	0.02	0.0568	Yes	https://www.collegefactual.com/colleges/california-state-university-fullerton/academic-life/academic-majors/computer-information-sciences/computer-science/	Feasible	California State University, Fullerton (CSUF) has a total graduate student enrollment of approximately 5,000. In the 2022-2023 academic year, 102 students completed a Master's degree in Computer Science. Assuming the number of enrolled students is similar to the number of graduates, this suggests that about 2% of CSUF's graduate students are studying computer science. <answer>2</answer>	Multiplication	Out
chapmanuniversity	TITLE: looking for roommates i am currently studying at CSUF for a masters in computer science. been living in a small apartment with like 2 other dudes that are graduating this year, so i need some roomies ASAP! i am a pretty chill guy and like to have downtime for myself. im not a big party animal, but i do enjoy having a couple of drinks with friends every now and then. im looking for someone …	been living in a small apartment	housing	Percentage of students at California State University, Fullerton that live off-campus	4	[1,2,3]	ChatGPT	Yes	Yes	High	0.97	0.97	Yes	https://www.usnews.com/best-colleges/california-state-university-fullerton-1137/student-life	Feasible	At California State University, Fullerton, approximately 97% of students live off-campus. This indicates that the vast majority of the student body resides outside of university-owned or affiliated housing.	Multiplication	Out
chapmanuniversity	TITLE: looking for roommates i am currently studying at CSUF for a masters in computer science. been living in a small apartment with like 2 other dudes that are graduating this year, so i need some roomies ASAP! i am a pretty chill guy and like to have downtime for myself. im not a big party animal, but i do enjoy having a couple of drinks with friends every now and then. im looking for someone …	i'm not a big party animal	interests	Percentage of college students in the US that do not attend parties frequently	5	[1,2,3,4]	ChatGPT	Yes	No	Medium	0.6	0.41	Yes	https://www.reuters.com/article/lifestyle/us-college-students-focused-on-studies-not-partying-survey-says-idUSKBN0L930G/	Feasible	Approximately 60% of college students in the U.S. report that they do not attend parties frequently, based on surveys about student lifestyles and social behaviors. Confidence Score: 0.8 <answer>60</answer>	Multiplication	Out

## Sheet: Ordering 2
Subreddit	Post	Disclosure (Ordering)	Disclosure Category	Query	ID	Conditionally Independent?	Source Used	Succeeded?	Reliable?	Annotator Confidence	Value	Ground Truth	Ground Truth Reliability	Ground Truth Source	Disclosure Type	ChatGPT Response	Operation	Parentheses
chapmanuniversity	TITLE: looking for roommates i am currently studying at CSUF for a masters in computer science. been living in a small apartment with like 2 other dudes that are graduating this year, so i need some roomies ASAP! i am a pretty chill guy and like to have downtime for myself. im not a big party animal, but i do enjoy having a couple of drinks with friends every now and then. im looking for someone …	i am currently studying at CSUF for a masters in computer science	education	Number of graduate students at California State University, Fullerton	1	[]	ChatGPT	Yes	Yes	High	5000	5019	Yes	https://www.fullerton.edu/data/_resources/pdfs/facts/CSUF%20Facts%20Fall%202023.pdf	Feasible	California State University, Fullerton typically has around 5,000 graduate students, based on recent enrollment data. Confidence Score: 0.9 <answer>5000</answer>	Multiplication	Out
chapmanuniversity	TITLE: looking for roommates i am currently studying at CSUF for a masters in computer science. been living in a small apartment with like 2 other dudes that are graduating this year, so i need some roomies ASAP! i am a pretty chill guy and like to have downtime for myself. im not a big party animal, but i do enjoy having a couple of drinks with friends every now and then. im looking for someone …	i am a pretty chill guy	gender	Percentage of students at California State University, Fullerton that are male	2	[1]	ChatGPT	Yes	Yes	High	0.42	0.426	Yes	https://www.fullerton.edu/data/_resources/pdfs/facts/CSUF%20Facts%20Fall%202023.pdf	Feasible	As of Fall 2023, male students comprised 42% of the student population at California State University, Fullerton. This indicates that 58% of the students were female. These figures are consistent with data from previous years, reflecting a stable gender distribution at the university.	Multiplication	Out
chapmanuniversity	TITLE: looking for roommates i am currently studying at CSUF for a masters in computer science. been living in a small apartment with like 2 other dudes that are graduating this year, so i need some roomies ASAP! i am a pretty chill guy and like to have downtime for myself. im not a big party animal, but i do enjoy having a couple of drinks with friends every now and then. im looking for someone …	i am currently studying at CSUF for a masters in computer science	education	Percentage of masters students at California State University, Fullerton that are studying computer science	3	[1,2]	ChatGPT	Yes	Yes	High	0.02	0.0568	Yes	https://www.collegefactual.com/colleges/california-state-university-fullerton/academic-life/academic-majors/computer-information-sciences/computer-science/	Feasible	California State University, Fullerton (CSUF) has a total graduate student enrollment of approximately 5,000. In the 2022-2023 academic year, 102 students completed a Master's degree in Computer Science. Assuming the number of enrolled students is similar to the number of graduates, this suggests that about 2% of CSUF's graduate students are studying computer science. <answer>2</answer>	Multiplication	Out
chapmanuniversity	TITLE: looking for roommates i am currently studying at CSUF for a masters in computer science. been living in a small apartment with like 2 other dudes that are graduating this year, so i need some roomies ASAP! i am a pretty chill guy and like to have downtime for myself. im not a big party animal, but i do enjoy having a couple of drinks with friends every now and then. im looking for someone …	been living in a small apartment	housing	Percentage of students at California State University, Fullerton that live off-campus	4	[1,2,3]	ChatGPT	Yes	Yes	High	0.97	0.97	Yes	https://www.usnews.com/best-colleges/california-state-university-fullerton-1137/student-life	Feasible	At California State University, Fullerton, approximately 97% of students live off-campus. This indicates that the vast majority of the student body resides outside of university-owned or affiliated housing.	Multiplication	Out
chapmanuniversity	TITLE: looking for roommates i am currently studying at CSUF for a masters in computer science. been living in a small apartment with like 2 other dudes that are graduating this year, so i need some roomies ASAP! i am a pretty chill guy and like to have downtime for myself. im not a big party animal, but i do enjoy having a couple of drinks with friends every now and then. im looking for someone …	with like 2 other dudes	personal_experience	Percentage of graduate students in the US that do not live alone	5	[1,2,3,4]	ChatGPT	Yes	No	Medium	0.7	0.82	Yes	https://www.multifamilyexecutive.com/property-management/apartment-trends/exclusive-research-7-000-students-reveal-their-housing-wants-and-needs_o#:~:text=In%20fact%2C%2042%20percent%20of,of%20graduate%20students%20live%20alone).	Feasible	Approximately 70% of graduate students in the U.S. do not live alone, based on housing and living arrangement data for students in higher education. Confidence Score: 0.8 <answer>70</answer>	Multiplication	Out
chapmanuniversity	TITLE: looking for roommates i am currently studying at CSUF for a masters in computer science. been living in a small apartment with like 2 other dudes that are graduating this year, so i need some roomies ASAP! i am a pretty chill guy and like to have downtime for myself. im not a big party animal, but i do enjoy having a couple of drinks with friends every now and then. im looking for someone …	i'm not a big party animal	interests	Percentage of college students in the US that do not attend parties frequently	6	[1,2,3,4,5]	ChatGPT	Yes	No	Medium	0.6	0.41	Yes	https://www.reuters.com/article/lifestyle/us-college-students-focused-on-studies-not-partying-survey-says-idUSKBN0L930G/	Feasible	Approximately 60% of college students in the U.S. report that they do not attend parties frequently, based on surveys about student lifestyles and social behaviors. Confidence Score: 0.8 <answer>60</answer>	Multiplication	Out
