# Supplementary material
Source: ML conference proceedings conference paper supplement (https://openreview.net/forum?id=HMVQ00vabY)
Supplement: supplementary_material [file 15.xlsx]

## Sheet: Ordering 1
Subreddit	Post	Disclosure (Ordering)	Disclosure Category	Query	ID	Conditionally Independent?	Source Used	Succeeded?	Reliable?	Annotator Confidence	Value	Ground Truth	Ground Truth Reliability	Ground Truth Source	Disclosure Type	ChatGPT Response	Operation	Parentheses
twoxchromosomes	TITLE: My boyfriend is upset with me about the abortion We're low income. I've been dating my boyfriend for about 2 years. We've been arguing a lot lately about my decision to get an abortion. I'm not ready to be a mother and I know it's the right decision for me. However, he's been getting really upset with me and I don't know how to handle the situation. I feel like he's judging me and I'm not …	twoxchromosomes	gender	number of women in the United States	1	[]	ChatGPT	Yes	Yes	High	167640000	168000000	Yes	https://www.census.gov/newsroom/facts-for-features/2024/womens-history-month.html	Feasible	"As of recent estimates, women make up about 50.8% of the U.S. population, which is approximately 330 million people. So, the number of women in the United States is roughly: 330,000,000×0.508≈167,640,000 <answer>167640000</answer> Confidence score: 0.95"	Multiplication	Out
twoxchromosomes	TITLE: My boyfriend is upset with me about the abortion We're low income. I've been dating my boyfriend for about 2 years. We've been arguing a lot lately about my decision to get an abortion. I'm not ready to be a mother and I know it's the right decision for me. However, he's been getting really upset with me and I don't know how to handle the situation. I feel like he's judging me and I'm not …	dating my boyfriend for about 2 years	relationship_status	percentage of people that are in a relationship for less than 5 years	2	[1]	ChatGPT	Yes	No	Medium	0.5	0.21	Yes	https://www.pewresearch.org/internet/2006/02/13/romance-in-america/#:~:text=21%25%20of%20all%20adult%20Americans,actively%20looking%20for%20romantic%20partners.	Feasible	Data on relationship duration suggests that a significant proportion of people in relationships are in relatively new ones, with many lasting less than 5 years. Studies estimate that around 40-60% of individuals in relationships fall into this category, depending on factors like age and marital status. A reasonable estimate is: <answer>50</answer> Confidence score: 0.85	Multiplication	Out
twoxchromosomes	TITLE: My boyfriend is upset with me about the abortion We're low income. I've been dating my boyfriend for about 2 years. We've been arguing a lot lately about my decision to get an abortion. I'm not ready to be a mother and I know it's the right decision for me. However, he's been getting really upset with me and I don't know how to handle the situation. I feel like he's judging me and I'm not …	get an abortion	reproductive_health	percentage of women that get a medical abortion in one year	3	[1, 2]	ChatGPT	Yes	Yes	High	0.025	0.019	Yes	https://www.cdc.gov/mmwr/volumes/71/ss/ss7110a1.htm	Feasible	In the United States, approximately 25-30% of women who have an abortion choose a medical abortion, which involves medication rather than surgery. However, when considering the percentage of all women who get a medical abortion in a given year (as opposed to just those who have abortions), the number is much smaller, likely around 2-3% of the total female population in any given year. A reasonabl…	Multiplication	Out
twoxchromosomes	TITLE: My boyfriend is upset with me about the abortion We're low income. I've been dating my boyfriend for about 2 years. We've been arguing a lot lately about my decision to get an abortion. I'm not ready to be a mother and I know it's the right decision for me. However, he's been getting really upset with me and I don't know how to handle the situation. I feel like he's judging me and I'm not …	we're low income	finance	percentage of abortions done by low-income patients	4	[1, 2]	ChatGPT	Yes	No	High	0.65	0.75	Yes	https://www.guttmacher.org/gpr/2016/07/abortion-lives-women-struggling-financially-why-insurance-coverage-matters	Feasible	Studies consistently show that a significant majority of abortion patients in the United States are low-income individuals. Approximately 50-75% of abortions are obtained by patients with incomes at or below 200% of the federal poverty level. A reasonable estimate is: <answer>65</answer> Confidence score: 0.9	Multiplication	Out
twoxchromosomes	TITLE: My boyfriend is upset with me about the abortion We're low income. I've been dating my boyfriend for about 2 years. We've been arguing a lot lately about my decision to get an abortion. I'm not ready to be a mother and I know it's the right decision for me. However, he's been getting really upset with me and I don't know how to handle the situation. I feel like he's judging me and I'm not …	we've been arguing a lot	relationship_status	percentage of abortions that result in arguments in the relationships or domestic violence	5	[1, 2, 4]	ChatGPT	Yes	Yes	Medium	0.15	0.22	No	https://bmcmedicine.biomedcentral.com/articles/10.1186/s12916-014-0144-z	Feasible	Research indicates that abortion decisions can sometimes lead to conflicts within relationships, though the rates vary widely based on individual circumstances. Estimates suggest that approximately 20-25% of abortions may be associated with increased arguments or conflict in relationships. Domestic violence, however, is a separate issue, and while some studies link reproductive control or coercio…	Multiplication	Out

## Sheet: Ordering 2
Subreddit	Post	Disclosure (Ordering)	Disclosure Category	Query	ID	Conditionally Independent?	Source Used	Succeeded?	Reliable?	Annotator Confidence	Value	Ground Truth	Ground Truth Reliability	Ground Truth Source	Disclosure Type	ChatGPT Response	Operation	Parentheses
twoxchromosomes	TITLE: My boyfriend is upset with me about the abortion We're low income. I've been dating my boyfriend for about 2 years. We've been arguing a lot lately about my decision to get an abortion. I'm not ready to be a mother and I know it's the right decision for me. However, he's been getting really upset with me and I don't know how to handle the situation. I feel like he's judging me and I'm not …	twoxchromosomes	gender	number of women in the United States	1	[]	ChatGPT	Yes	Yes	High	167640000	168000000	Yes	https://www.census.gov/newsroom/facts-for-features/2024/womens-history-month.html	Feasible	"As of recent estimates, women make up about 50.8% of the U.S. population, which is approximately 330 million people. So, the number of women in the United States is roughly: 330,000,000×0.508≈167,640,000 <answer>167640000</answer> Confidence score: 0.95"	Multiplication	Out
twoxchromosomes	TITLE: My boyfriend is upset with me about the abortion We're low income. I've been dating my boyfriend for about 2 years. We've been arguing a lot lately about my decision to get an abortion. I'm not ready to be a mother and I know it's the right decision for me. However, he's been getting really upset with me and I don't know how to handle the situation. I feel like he's judging me and I'm not …	dating my boyfriend	relationship_status	percentage of people in the US in a relationship	2	[1]	ChatGPT	Yes	No	Medium	0.55	0.68	Yes	https://www.pewresearch.org/internet/2006/02/13/romance-in-america/#:~:text=21%25%20of%20all%20adult%20Americans,actively%20looking%20for%20romantic%20partners.	Feasible	Research and surveys, such as those from the Pew Research Center, suggest that approximately 50-60% of adults in the United States are in a romantic relationship at any given time. This includes those who are married, cohabiting, or dating. A reasonable estimate is: <answer>55</answer> Confidence score: 0.9	Multiplication	Out
twoxchromosomes	TITLE: My boyfriend is upset with me about the abortion We're low income. I've been dating my boyfriend for about 2 years. We've been arguing a lot lately about my decision to get an abortion. I'm not ready to be a mother and I know it's the right decision for me. However, he's been getting really upset with me and I don't know how to handle the situation. I feel like he's judging me and I'm not …	get an abortion	reproductive_health	percentage of women that get a medical abortion in one year	3	[1, 2]	ChatGPT	Yes	Yes	High	0.025	0.019	Yes	https://www.cdc.gov/mmwr/volumes/71/ss/ss7110a1.htm	Feasible	In the United States, approximately 25-30% of women who have an abortion choose a medical abortion, which involves medication rather than surgery. However, when considering the percentage of all women who get a medical abortion in a given year (as opposed to just those who have abortions), the number is much smaller, likely around 2-3% of the total female population in any given year. A reasonabl…	Multiplication	Out
twoxchromosomes	TITLE: My boyfriend is upset with me about the abortion We're low income. I've been dating my boyfriend for about 2 years. We've been arguing a lot lately about my decision to get an abortion. I'm not ready to be a mother and I know it's the right decision for me. However, he's been getting really upset with me and I don't know how to handle the situation. I feel like he's judging me and I'm not …	we're low income	finance	percentage of abortions done by low-income patients	4	[1, 2]	ChatGPT	Yes	No	High	0.65	0.75	Yes	https://www.guttmacher.org/gpr/2016/07/abortion-lives-women-struggling-financially-why-insurance-coverage-matters	Feasible	Studies consistently show that a significant majority of abortion patients in the United States are low-income individuals. Approximately 50-75% of abortions are obtained by patients with incomes at or below 200% of the federal poverty level. A reasonable estimate is: <answer>65</answer> Confidence score: 0.9	Multiplication	Out
twoxchromosomes	TITLE: My boyfriend is upset with me about the abortion We're low income. I've been dating my boyfriend for about 2 years. We've been arguing a lot lately about my decision to get an abortion. I'm not ready to be a mother and I know it's the right decision for me. However, he's been getting really upset with me and I don't know how to handle the situation. I feel like he's judging me and I'm not …	we've been arguing a lot	relationship_status	percentage of abortions that result in arguments in the relationships or domestic violence	5	[1, 2, 4]	ChatGPT	Yes	Yes	Medium	0.15	0.22	No	https://bmcmedicine.biomedcentral.com/articles/10.1186/s12916-014-0144-z	Feasible	Research indicates that abortion decisions can sometimes lead to conflicts within relationships, though the rates vary widely based on individual circumstances. Estimates suggest that approximately 20-25% of abortions may be associated with increased arguments or conflict in relationships. Domestic violence, however, is a separate issue, and while some studies link reproductive control or coercio…	Multiplication	Out
