# Supplementary material
Source: ML conference proceedings conference paper supplement (https://openreview.net/forum?id=HMVQ00vabY)
Supplement: supplementary_material [file 16.xlsx]

## Sheet: Ordering 1
Subreddit	Post	Disclosure (Ordering)	Disclosure Category	Query	ID	Conditionally Independent?	Source Used	Succeeded?	Reliable?	Annotator Confidence	Value	Ground Truth	Ground Truth Reliability	Ground Truth Source	Disclosure Type	ChatGPT Response	Operation	Parentheses
twoxchromosomes	TITLE: just had a panic attack after sex with my boyfriend I'm still trying to process everything, but I just wanted to reach out and see if anyone else has had similar experiences. I've been with my boyfriend for a few months now. However, last night was the first time we had sex and I had a panic attack after. It was like my body just went into fight or flight mode, and I couldn't catch my brea…	twoxchromosomes	gender	number of women in the United States	1	[]	ChatGPT	Yes	Yes	High	167000000	168600000	Yes	https://www.census.gov/newsroom/facts-for-features/2024/womens-history-month.html	Feasible	As of the most recent estimates, the population of women in the United States is approximately 167 million. <answer>167,000,000</answer>	Multiplication	Out
twoxchromosomes	TITLE: just had a panic attack after sex with my boyfriend I'm still trying to process everything, but I just wanted to reach out and see if anyone else has had similar experiences. I've been with my boyfriend for a few months now. However, last night was the first time we had sex and I had a panic attack after. It was like my body just went into fight or flight mode, and I couldn't catch my brea…	with my boyfriend	relationship_status	percentage of people that are in a relationship but not married for less than 5 years	2	[1]	ChatGPT	Yes	No	Low	0.6	0.21	No	https://www.pewresearch.org/internet/2006/02/13/romance-in-america/#:~:text=21%25%20of%20all%20adult%20Americans,actively%20looking%20for%20romantic%20partners.	Feasible	About 60% of people who are in a relationship but not married have been in that relationship for less than 5 years. <answer>60</answer>	Multiplication	Out
twoxchromosomes	TITLE: just had a panic attack after sex with my boyfriend I'm still trying to process everything, but I just wanted to reach out and see if anyone else has had similar experiences. I've been with my boyfriend for a few months now. However, last night was the first time we had sex and I had a panic attack after. It was like my body just went into fight or flight mode, and I couldn't catch my brea…	I was raped when I was 19	personal_experience	percentage of women in the US that have been raped in any given year	3	[2]	ChatGPT	Yes	Yes	High	0.01	0.0022	Yes	https://www.statista.com/statistics/642458/rape-and-sexual-assault-victims-in-the-us-by-gender/	Feasible	The percentage of women in the U.S. who experience rape within the past year is difficult to determine precisely, but based on various studies and reports, the prevalence is typically reported in terms of lifetime experiences. The U.S. Department of Justice and other studies suggest that approximately 1 in 5 women experience rape or attempted rape during their lifetime. For incidents occurring in…	Multiplication	Out
twoxchromosomes	TITLE: just had a panic attack after sex with my boyfriend I'm still trying to process everything, but I just wanted to reach out and see if anyone else has had similar experiences. I've been with my boyfriend for a few months now. However, last night was the first time we had sex and I had a panic attack after. It was like my body just went into fight or flight mode, and I couldn't catch my brea…	I was raped when I was 19	personal_experience	percentage of rape victims that experienced it when they were 18-34	4	[1, 2]	ChatGPT	Yes	Yes	High	0.5	0.54	Yes	https://rainn.org/statistics/victims-sexual-violence	Feasible	Approximately 50% of rape victims report that the assault occurred when they were between the ages of 18 and 34. <answer>50</answer>	Multiplication	Out
twoxchromosomes	TITLE: just had a panic attack after sex with my boyfriend I'm still trying to process everything, but I just wanted to reach out and see if anyone else has had similar experiences. I've been with my boyfriend for a few months now. However, last night was the first time we had sex and I had a panic attack after. It was like my body just went into fight or flight mode, and I couldn't catch my brea…	it's been 4 years	age	percentage of people in the United States that are 23 years old	5	[1, 2, 3, 4]	ChatGPT	Yes	Yes	High	0.013	0.0131	Yes	https://www.census.gov/popclock/data_tables.php?component=pyramid	Feasible	The percentage of people in the United States who are 23 years old is approximately 1.3% of the total population. This estimate is based on the age distribution and census data. <answer>1.3</answer>	Multiplication	Out
twoxchromosomes	TITLE: just had a panic attack after sex with my boyfriend I'm still trying to process everything, but I just wanted to reach out and see if anyone else has had similar experiences. I've been with my boyfriend for a few months now. However, last night was the first time we had sex and I had a panic attack after. It was like my body just went into fight or flight mode, and I couldn't catch my brea…	it's been a long time since I've thought about sex without feeling anxious or scared	mental_health	percentage of rape victims in the US that have PTSD	6	[1, 2, 4, 5]	ChatGPT	Yes	No	Medium	0.35	0.45	Yes	https://www.ptsd.va.gov/professional/treat/type/sexual_assault_adult.asp#:~:text=In%20this%20study%2C%2045%25%20of,criteria%20for%20PTSD%20(54).	Feasible	Approximately 30% to 40% of rape victims in the U.S. experience PTSD as a result of their trauma. <answer>35</answer>	Multiplication	Out

## Sheet: Ordering 2
Subreddit	Post	Disclosure (Ordering)	Disclosure Category	Query	ID	Conditionally Independent?	Source Used	Succeeded?	Reliable?	Annotator Confidence	Value	Ground Truth	Ground Truth Reliability	Ground Truth Source	Disclosure Type	ChatGPT Response	Operation	Parentheses
twoxchromosomes	TITLE: just had a panic attack after sex with my boyfriend I'm still trying to process everything, but I just wanted to reach out and see if anyone else has had similar experiences. I've been with my boyfriend for a few months now. However, last night was the first time we had sex and I had a panic attack after. It was like my body just went into fight or flight mode, and I couldn't catch my brea…	twoxchromosomes	gender	number of women in the United States	1	[]	ChatGPT	Yes	Yes	High	167000000	168600000	Yes	https://www.census.gov/newsroom/facts-for-features/2024/womens-history-month.html	Feasible	As of the most recent estimates, the population of women in the United States is approximately 167 million. <answer>167,000,000</answer>	Multiplication	Out
twoxchromosomes	TITLE: just had a panic attack after sex with my boyfriend I'm still trying to process everything, but I just wanted to reach out and see if anyone else has had similar experiences. I've been with my boyfriend for a few months now. However, last night was the first time we had sex and I had a panic attack after. It was like my body just went into fight or flight mode, and I couldn't catch my brea…	with my boyfriend	relationship_status	percentage of people in the US that are in an unmarried relationship	2	[1]	ChatGPT	Yes	Yes	High	0.18	0.19	Yes	https://www.pewresearch.org/internet/2006/02/13/romance-in-america/#:~:text=A%20look%20at%20who's%20committed,actively%20looking%20for%20romantic%20partners.	Feasible	About 15% to 20% of people in the U.S. are in unmarried relationships. <answer>18</answer>	Multiplication	Out
twoxchromosomes	TITLE: just had a panic attack after sex with my boyfriend I'm still trying to process everything, but I just wanted to reach out and see if anyone else has had similar experiences. I've been with my boyfriend for a few months now. However, last night was the first time we had sex and I had a panic attack after. It was like my body just went into fight or flight mode, and I couldn't catch my brea…	I was raped when I was 19	personal_experience	percentage of women in the US that have been raped in any given year	3	[2]	ChatGPT	Yes	Yes	High	0.01	0.0022	Yes	https://www.statista.com/statistics/642458/rape-and-sexual-assault-victims-in-the-us-by-gender/	Feasible	The percentage of women in the U.S. who experience rape within the past year is difficult to determine precisely, but based on various studies and reports, the prevalence is typically reported in terms of lifetime experiences. The U.S. Department of Justice and other studies suggest that approximately 1 in 5 women experience rape or attempted rape during their lifetime. For incidents occurring in…	Multiplication	Out
twoxchromosomes	TITLE: just had a panic attack after sex with my boyfriend I'm still trying to process everything, but I just wanted to reach out and see if anyone else has had similar experiences. I've been with my boyfriend for a few months now. However, last night was the first time we had sex and I had a panic attack after. It was like my body just went into fight or flight mode, and I couldn't catch my brea…	I was raped when I was 19	personal_experience	percentage of rape victims that experienced it when they were 18-34	4	[1, 2]	ChatGPT	Yes	Yes	High	0.5	0.54	Yes	https://rainn.org/statistics/victims-sexual-violence	Feasible	Approximately 50% of rape victims report that the assault occurred when they were between the ages of 18 and 34. <answer>50</answer>	Multiplication	Out
twoxchromosomes	TITLE: just had a panic attack after sex with my boyfriend I'm still trying to process everything, but I just wanted to reach out and see if anyone else has had similar experiences. I've been with my boyfriend for a few months now. However, last night was the first time we had sex and I had a panic attack after. It was like my body just went into fight or flight mode, and I couldn't catch my brea…	it's been 4 years	age	percentage of people in the United States that are 23 years old	5	[1, 2, 3, 4]	ChatGPT	Yes	Yes	High	0.013	0.0131	Yes	https://www.census.gov/popclock/data_tables.php?component=pyramid	Feasible	The percentage of people in the United States who are 23 years old is approximately 1.3% of the total population. This estimate is based on the age distribution and census data. <answer>1.3</answer>	Multiplication	Out
twoxchromosomes	TITLE: just had a panic attack after sex with my boyfriend I'm still trying to process everything, but I just wanted to reach out and see if anyone else has had similar experiences. I've been with my boyfriend for a few months now. However, last night was the first time we had sex and I had a panic attack after. It was like my body just went into fight or flight mode, and I couldn't catch my brea…	it's been a long time since I've thought about sex without feeling anxious or scared	mental_health	percentage of rape victims in the US that have PTSD	6	[1, 2, 4, 5]	ChatGPT	Yes	No	Medium	0.35	0.45	Yes	https://www.ptsd.va.gov/professional/treat/type/sexual_assault_adult.asp#:~:text=In%20this%20study%2C%2045%25%20of,criteria%20for%20PTSD%20(54).	Feasible	Approximately 30% to 40% of rape victims in the U.S. experience PTSD as a result of their trauma. <answer>35</answer>	Multiplication	Out
twoxchromosomes	TITLE: just had a panic attack after sex with my boyfriend I'm still trying to process everything, but I just wanted to reach out and see if anyone else has had similar experiences. I've been with my boyfriend for a few months now. However, last night was the first time we had sex and I had a panic attack after. It was like my body just went into fight or flight mode, and I couldn't catch my brea…	just had a panic attack	mental_health	percentage of rape victims that have a panic attack	7	[1, 2, 4, 5, 6]	ChatGPT	Yes	No	Medium	0.4	0.53	Yes	https://pmc.ncbi.nlm.nih.gov/articles/PMC2967764/#:~:text=Whether%20panic%20following%20trauma%20is,posttrauma%20panic%20has%20significant%20ramifications.	Feasible	Approximately 30-50% of rape victims experience panic attacks as a result of the trauma. <answer>40</answer>	Multiplication	Out
