# Supplementary material
Source: ML conference proceedings conference paper supplement (https://openreview.net/forum?id=HMVQ00vabY)
Supplement: supplementary_material [file 16.xlsx]

## Sheet: Ordering 1
Subreddit	Post	Disclosure (Ordering)	Disclosure Category	Query	ID	Conditionally Independent?	Source Used	Succeeded?	Reliable?	Annotator Confidence	Value	Ground Truth	Ground Truth Reliability	Ground Truth Source	Disclosure Type	ChatGPT Response	Operation	Parentheses
chapmanuniversity	TITLE: chapman film major prospects Hey guys, I'm currently a high school senior with a 3.88 GPA and I'm interested in majoring in film and television production at Chapman. I've been part of my school's audio video club and I'm pretty passionate about film. I am also on the varsity football team and have gotten an honorable mention at my high school's film festival. What are my chances at gettin…	I'm interested in majoring in film and television production at Chapman	education	Number of applicants to Chapman University in a single year	1	[]	ChatGPT	Yes	Yes	High	13690	13690	Yes	https://www.collegetransitions.com/blog/chapman-university-acceptance-rate/#:~:text=Chapman%20Acceptance%20Rate&text=In%20the%20Fall%20of%202022,are%20not%20mandatory%20to%20apply.	Feasible	In 2022, Chapman University received 13,690 undergraduate applications. This represents a 9.33% decrease from the previous year. The acceptance rate for that year was 72.5%, with 9,928 students admitted. In 2021, the university received 15,100 applications, marking a 10% increase from the prior year. The acceptance rate for 2021 was 60.4%. For the Class of 2022 (enrolling fall 2018), Chapman rece…	Multiplication	Out
chapmanuniversity	TITLE: chapman film major prospects Hey guys, I'm currently a high school senior with a 3.88 GPA and I'm interested in majoring in film and television production at Chapman. I've been part of my school's audio video club and I'm pretty passionate about film. I am also on the varsity football team and have gotten an honorable mention at my high school's film festival. What are my chances at gettin…	I'm currently a high school senior with a 3.88 GPA	education	Percentage of high school students in the US that have above a 3.8 GPA	2	[1]	ChatGPT	Yes	No	Medium	0.15	0.07	Yes	https://www.prepscholar.com/sat/s/gpa/3.8-GPA-is-this-good-for-colleges	Feasible	Approximately 15% of high school students in the U.S. have a GPA above 3.8, based on academic performance distributions. Confidence Score: 0.8 <answer>15</answer>	Multiplication	Out
chapmanuniversity	TITLE: chapman film major prospects Hey guys, I'm currently a high school senior with a 3.88 GPA and I'm interested in majoring in film and television production at Chapman. I've been part of my school's audio video club and I'm pretty passionate about film. I am also on the varsity football team and have gotten an honorable mention at my high school's film festival. What are my chances at gettin…	my family only makes 70k a year	finance	Percentage of families in the US that have an annual income of 70,000	3	[1,2]	ChatGPT	Yes	Yes	High	0.17	0.121	Yes	https://www.statista.com/statistics/203183/percentage-distribution-of-household-income-in-the-us/	Feasible	Approximately 17% of families in the U.S. have an annual income of $70,000, based on income distribution data. Confidence Score: 0.85 <answer>17</answer>	Multiplication	Out
chapmanuniversity	TITLE: chapman film major prospects Hey guys, I'm currently a high school senior with a 3.88 GPA and I'm interested in majoring in film and television production at Chapman. I've been part of my school's audio video club and I'm pretty passionate about film. I am also on the varsity football team and have gotten an honorable mention at my high school's film festival. What are my chances at gettin…	I am also on the varsity football team	interests	Percentage of high school students in the US that are on the football team	4	[1,2,3]	ChatGPT	Yes	Yes	High	0.07	0.0601	Yes	https://footballfoundation.org/news/2023/7/25/football-by-the-numbers.aspx	Feasible	Approximately 7% of high school students in the U.S. participate on football teams, based on participation data from school athletic programs. Confidence Score: 0.8 <answer>7</answer>	Multiplication	Out
chapmanuniversity	TITLE: chapman film major prospects Hey guys, I'm currently a high school senior with a 3.88 GPA and I'm interested in majoring in film and television production at Chapman. I've been part of my school's audio video club and I'm pretty passionate about film. I am also on the varsity football team and have gotten an honorable mention at my high school's film festival. What are my chances at gettin…	I've been part of my school's audio video club	interests	Percentage of high school students in the US that are involved in clubs	5	[1,2,3,4]	ChatGPT	Yes	No	Low	0.5	0.213	Yes	https://nces.ed.gov/programs/digest/d13/tables/dt13_227.30.asp	Feasible	Approximately 50% of high school students in the U.S. are involved in clubs or extracurricular activities, based on studies on student participation in school-based programs. Confidence Score: 0.85 <answer>50</answer>	Multiplication	Out

## Sheet: Ordering 2
Subreddit	Post	Disclosure (Ordering)	Disclosure Category	Query	ID	Conditionally Independent?	Source Used	Succeeded?	Reliable?	Annotator Confidence	Value	Ground Truth	Ground Truth Reliability	Ground Truth Source	Disclosure Type	ChatGPT Response	Operation	Parentheses
chapmanuniversity	TITLE: chapman film major prospects Hey guys, I'm currently a high school senior with a 3.88 GPA and I'm interested in majoring in film and television production at Chapman. I've been part of my school's audio video club and I'm pretty passionate about film. I am also on the varsity football team and have gotten an honorable mention at my high school's film festival. What are my chances at gettin…	I'm interested in majoring in film and television production at Chapman	Education	Number of applicants to Chapman University in a single year	1	[]	ChatGPT	Yes	Yes	High	13690	13690	Yes	https://www.collegetransitions.com/blog/chapman-university-acceptance-rate/#:~:text=Chapman%20Acceptance%20Rate&text=In%20the%20Fall%20of%202022,are%20not%20mandatory%20to%20apply.	Feasible	In 2022, Chapman University received 13,690 undergraduate applications. This represents a 9.33% decrease from the previous year. The acceptance rate for that year was 72.5%, with 9,928 students admitted. In 2021, the university received 15,100 applications, marking a 10% increase from the prior year. The acceptance rate for 2021 was 60.4%. For the Class of 2022 (enrolling fall 2018), Chapman rece…	Multiplication	Out
chapmanuniversity	TITLE: chapman film major prospects Hey guys, I'm currently a high school senior with a 3.88 GPA and I'm interested in majoring in film and television production at Chapman. I've been part of my school's audio video club and I'm pretty passionate about film. I am also on the varsity football team and have gotten an honorable mention at my high school's film festival. What are my chances at gettin…	I'm interested in majoring in film and television production at Chapman	Education	Percentage of students at Chapman University that are in the Dodge College of Film and Media Arts	2	[1]	ChatGPT	Yes	Yes	High	0.125	0.16	Yes	https://www.chapman.edu/campus-services/institutional-research/_files/fact-sheet/fact-sheet-2020.pdf	Feasible	Chapman University has approximately 7,656 undergraduate students and 2,345 graduate students, totaling 10,001 students. Dodge College of Film and Media Arts offers both undergraduate and graduate programs, but specific enrollment numbers for Dodge College are not publicly available. However, considering that Dodge College is one of several colleges within Chapman University, it's reasonable to e…	Multiplication	Out
chapmanuniversity	TITLE: chapman film major prospects Hey guys, I'm currently a high school senior with a 3.88 GPA and I'm interested in majoring in film and television production at Chapman. I've been part of my school's audio video club and I'm pretty passionate about film. I am also on the varsity football team and have gotten an honorable mention at my high school's film festival. What are my chances at gettin…	I'm currently a high school senior with a 3.88 GPA	education	Percentage of high school students in the US that have above a 3.8 GPA	3	[1,2]	ChatGPT	Yes	No	Medium	0.15	0.07	Yes	https://www.prepscholar.com/sat/s/gpa/3.8-GPA-is-this-good-for-colleges	Feasible	Approximately 15% of high school students in the U.S. have a GPA above 3.8, based on academic performance distributions. Confidence Score: 0.8 <answer>15</answer>	Multiplication	Out
chapmanuniversity	TITLE: chapman film major prospects Hey guys, I'm currently a high school senior with a 3.88 GPA and I'm interested in majoring in film and television production at Chapman. I've been part of my school's audio video club and I'm pretty passionate about film. I am also on the varsity football team and have gotten an honorable mention at my high school's film festival. What are my chances at gettin…	my family only makes 70k a year	finance	Percentage of families in the US that have an annual income of 70,000	4	[1,2,3]	ChatGPT	Yes	Yes	High	0.17	0.121	Yes	https://www.statista.com/statistics/203183/percentage-distribution-of-household-income-in-the-us/	Feasible	Approximately 17% of families in the U.S. have an annual income of $70,000, based on income distribution data. Confidence Score: 0.85 <answer>17</answer>	Multiplication	Out
chapmanuniversity	TITLE: chapman film major prospects Hey guys, I'm currently a high school senior with a 3.88 GPA and I'm interested in majoring in film and television production at Chapman. I've been part of my school's audio video club and I'm pretty passionate about film. I am also on the varsity football team and have gotten an honorable mention at my high school's film festival. What are my chances at gettin…	I am also on the varsity football team	interests	Percentage of high school students in the US that are on the football team	5	[1,2,3,4]	ChatGPT	Yes	Yes	High	0.07	0.0601	Yes	https://footballfoundation.org/news/2023/7/25/football-by-the-numbers.aspx	Feasible	Approximately 7% of high school students in the U.S. participate on football teams, based on participation data from school athletic programs. Confidence Score: 0.8 <answer>7</answer>	Multiplication	Out
chapmanuniversity	TITLE: chapman film major prospects Hey guys, I'm currently a high school senior with a 3.88 GPA and I'm interested in majoring in film and television production at Chapman. I've been part of my school's audio video club and I'm pretty passionate about film. I am also on the varsity football team and have gotten an honorable mention at my high school's film festival. What are my chances at gettin…	I've been part of my school's audio video club	interests	Percentage of high school students in the US that are involved in clubs	6	[1,2,3,4,5]	ChatGPT	Yes	No	Low	0.5	0.213	Yes	https://nces.ed.gov/programs/digest/d13/tables/dt13_227.30.asp	Feasible	Approximately 50% of high school students in the U.S. are involved in clubs or extracurricular activities, based on studies on student participation in school-based programs. Confidence Score: 0.85 <answer>50</answer>	Multiplication	Out
