# Supplementary material
Source: ML conference proceedings conference paper supplement (https://openreview.net/forum?id=HMVQ00vabY)
Supplement: supplementary_material [file 17.xlsx]

## Sheet: Ordering 1
Subreddit	Post	Disclosure (Ordering)	Disclosure Category	Query	ID	Conditionally Independent?	Source Used	Succeeded?	Reliable?	Annotator Confidence	Value	Ground Truth	Ground Truth Reliability	Ground Truth Source	Disclosure Type	ChatGPT Response	Operation	Parentheses
twoxchromosomes	TITLE: I'm getting stalked by someone in my neighborhood and I'm terrified I (26F) have been in my neighborhood for 3 years now. I have a big dog that I like to take on walks. Recently, I've started noticing that someone's been following me around the neighborhood. At first, I thought it was just my imagination, but then I started to notice that this person would show up in all the places I would…	26F	age_gender	number of 26 year old women in the United States	1	[]	ChatGPT	Yes	Yes	High	1650000	2143360	Yes	https://www.census.gov/popclock/data_tables.php?component=pyramid	Feasible	To estimate the number of 26-year-old women in the United States, we assume that women make up about 50% of the population, and each age group represents approximately 1/100th of the total population. With the U.S. population around 330 million: 330,000,000×0.5×1/100 =1,650,000 <answer>1650000</answer> Confidence score: 0.9	Multiplication	Out
twoxchromosomes	TITLE: I'm getting stalked by someone in my neighborhood and I'm terrified I (26F) have been in my neighborhood for 3 years now. I have a big dog that I like to take on walks. Recently, I've started noticing that someone's been following me around the neighborhood. At first, I thought it was just my imagination, but then I started to notice that this person would show up in all the places I would…	my house	possessions	percentage of 26 year olds in the US that own their own homes	2	[1]	ChatGPT	Yes	Yes	High	0.32	0.3	Yes	https://www.marketplace.org/2023/09/14/how-are-gen-zers-buying-homes-already/	Feasible	Homeownership rates among young adults, including 26-year-olds, are relatively low due to factors like student loan debt, high housing costs, and career mobility. Studies suggest that approximately 30-35% of people in their mid-to-late 20s own their own homes in the United States. A reasonable estimate is: <answer>32</answer> Confidence score: 0.85	Multiplication	Out
twoxchromosomes	TITLE: I'm getting stalked by someone in my neighborhood and I'm terrified I (26F) have been in my neighborhood for 3 years now. I have a big dog that I like to take on walks. Recently, I've started noticing that someone's been following me around the neighborhood. At first, I thought it was just my imagination, but then I started to notice that this person would show up in all the places I would…	I'm getting stalked by someone in my neighborhood	personal_experience	percentage of women in the US that experience stalking in the last year	3	[1, 2]	ChatGPT	Yes	Yes	Medium	0.08	0.02	Yes	https://www.justice.gov/archive/ovw/docs/bjs-stalking-rpt.pdf	Feasible	Research suggests that around 7-10% of women in the United States experience stalking within a given year. This figure includes behaviors such as being followed, harassed, or threatened by an individual. The prevalence can be higher among certain groups, such as college students or women in urban areas. A reasonable estimate is: <answer>8</answer> Confidence score: 0.85	Multiplication	Out
twoxchromosomes	TITLE: I'm getting stalked by someone in my neighborhood and I'm terrified I (26F) have been in my neighborhood for 3 years now. I have a big dog that I like to take on walks. Recently, I've started noticing that someone's been following me around the neighborhood. At first, I thought it was just my imagination, but then I started to notice that this person would show up in all the places I would…	I have a big dog	pet	percentage of people that own a dog in the US	4	[1, 2, 3]	ChatGPT	Yes	Yes	Medium	0.48	0.4	Yes	https://www.nar.realtor/blogs/economists-outlook/a-stunning-stat-there-are-more-american-households-with-pets-than-children	Feasible	Recent surveys estimate that about 45-50% of U.S. households own a dog. This number can vary slightly based on factors like age, geographic location, and socio-economic status. A reasonable estimate is: <answer>48</answer> Confidence score: 0.9	Multiplication	Out
twoxchromosomes	TITLE: I'm getting stalked by someone in my neighborhood and I'm terrified I (26F) have been in my neighborhood for 3 years now. I have a big dog that I like to take on walks. Recently, I've started noticing that someone's been following me around the neighborhood. At first, I thought it was just my imagination, but then I started to notice that this person would show up in all the places I would…	I have a big dog	pet	percentage of dog owners in the US that have a large dog	5	[1, 2, 3]	ChatGPT	Yes	Yes	High	0.45	0.458	Yes	https://www.statcrunch.com/reports/view?reportid=113917&tab=preview	Feasible	Studies show that about 40-50% of dog owners in the United States have a large dog, typically defined as a breed weighing over 50 pounds. This varies slightly depending on factors such as breed popularity and living conditions. A reasonable estimate is: <answer>45</answer> Confidence score: 0.9	Multiplication	Out

## Sheet: Ordering 2
Subreddit	Post	Disclosure (Ordering)	Disclosure Category	Query	ID	Conditionally Independent?	Source Used	Succeeded?	Reliable?	Annotator Confidence	Value	Ground Truth	Ground Truth Reliability	Ground Truth Source	Disclosure Type	ChatGPT Response	Operation	Parentheses
twoxchromosomes	TITLE: I'm getting stalked by someone in my neighborhood and I'm terrified I (26F) have been in my neighborhood for 3 years now. I have a big dog that I like to take on walks. Recently, I've started noticing that someone's been following me around the neighborhood. At first, I thought it was just my imagination, but then I started to notice that this person would show up in all the places I would…	26F	age_gender	number of 26 year old women in the United States	1	[]	ChatGPT	Yes	Yes	High	1650000	2143360	Yes	https://www.census.gov/popclock/data_tables.php?component=pyramid	Feasible	To estimate the number of 26-year-old women in the United States, we assume that women make up about 50% of the population, and each age group represents approximately 1/100th of the total population. With the U.S. population around 330 million: 330,000,000×0.5×1/100 =1,650,000 <answer>1650000</answer> Confidence score: 0.9	Multiplication	Out
twoxchromosomes	TITLE: I'm getting stalked by someone in my neighborhood and I'm terrified I (26F) have been in my neighborhood for 3 years now. I have a big dog that I like to take on walks. Recently, I've started noticing that someone's been following me around the neighborhood. At first, I thought it was just my imagination, but then I started to notice that this person would show up in all the places I would…	my house	possessions	percentage of 26 year olds in the US that own their own homes	2	[1]	ChatGPT	Yes	Yes	High	0.32	0.3	Yes	https://www.marketplace.org/2023/09/14/how-are-gen-zers-buying-homes-already/	Feasible	Homeownership rates among young adults, including 26-year-olds, are relatively low due to factors like student loan debt, high housing costs, and career mobility. Studies suggest that approximately 30-35% of people in their mid-to-late 20s own their own homes in the United States. A reasonable estimate is: <answer>32</answer> Confidence score: 0.85	Multiplication	Out
twoxchromosomes	TITLE: I'm getting stalked by someone in my neighborhood and I'm terrified I (26F) have been in my neighborhood for 3 years now. I have a big dog that I like to take on walks. Recently, I've started noticing that someone's been following me around the neighborhood. At first, I thought it was just my imagination, but then I started to notice that this person would show up in all the places I would…	I'm getting stalked by someone in my neighborhood	personal_experience	percentage of women in the US that experience stalking in their lifetime	3	[1, 2]	ChatGPT	Yes	No	Medium	0.17	0.33	Yes	https://www.justice.gov/ovw/blog/ovw-observes-national-stalking-awareness-month-2023#:~:text=Stalking%20is%20a%20form%20of,face%20stalking%20in%20their%20lifetimes.	Feasible	Research indicates that stalking is a significant issue, with approximately 15-20% of women in the United States experiencing stalking at some point in their lifetime. The exact percentage may vary depending on the definition of stalking and the population studied. A reasonable estimate is: <answer>17</answer> Confidence score: 0.9	Multiplication	Out
twoxchromosomes	TITLE: I'm getting stalked by someone in my neighborhood and I'm terrified I (26F) have been in my neighborhood for 3 years now. I have a big dog that I like to take on walks. Recently, I've started noticing that someone's been following me around the neighborhood. At first, I thought it was just my imagination, but then I started to notice that this person would show up in all the places I would…	I have a big dog	pet	percentage of people that own a dog in the US	4	[1, 2, 3]	ChatGPT	Yes	Yes	Medium	0.48	0.4	Yes	https://www.nar.realtor/blogs/economists-outlook/a-stunning-stat-there-are-more-american-households-with-pets-than-children	Feasible	Recent surveys estimate that about 45-50% of U.S. households own a dog. This number can vary slightly based on factors like age, geographic location, and socio-economic status. A reasonable estimate is: <answer>48</answer> Confidence score: 0.9	Multiplication	Out
twoxchromosomes	TITLE: I'm getting stalked by someone in my neighborhood and I'm terrified I (26F) have been in my neighborhood for 3 years now. I have a big dog that I like to take on walks. Recently, I've started noticing that someone's been following me around the neighborhood. At first, I thought it was just my imagination, but then I started to notice that this person would show up in all the places I would…	I have a big dog	pet	percentage of dog owners in the US that have a large dog	5	[1, 2, 3]	ChatGPT	Yes	Yes	High	0.45	0.458	Yes	https://www.statcrunch.com/reports/view?reportid=113917&tab=preview	Feasible	Studies show that about 40-50% of dog owners in the United States have a large dog, typically defined as a breed weighing over 50 pounds. This varies slightly depending on factors such as breed popularity and living conditions. A reasonable estimate is: <answer>45</answer> Confidence score: 0.9	Multiplication	Out
