# Supplementary material
Source: ML conference proceedings conference paper supplement (https://openreview.net/forum?id=HMVQ00vabY)
Supplement: supplementary_material [file 17.xlsx]

## Sheet: Ordering 1
Subreddit	Post	Disclosure (Ordering)	Disclosure Category	Query	ID	Conditionally Independent?	Source Used	Succeeded?	Reliable?	Annotator Confidence	Value	Ground Truth	Ground Truth Reliability	Ground Truth Source	Disclosure Type	ChatGPT Response	Operation	Parentheses
chapmanuniversity	TITLE: looking for Chapman University students to participate in a research survey about Latin students Hey there! I'm a master's student at NYU, and I'm currently working on my research thesis. I'm investigating the relationship between **self-efficacy and academic performance in Hispanic and Latino/a students**. I'm really interested in understanding how our community navigates the academic env…	I'm a master's student at NYU	education	Number of graduate and professional students at NYU	1	[]	ChatGPT	Yes	No	High	26100	29760	Yes	https://www.nyu.edu/about/news-publications/nyu-at-a-glance.html#:~:text=Total:%2021%2C776,Professional:%201%2C021	Feasible	To estimate the number of graduate and professional students at NYU: 1. NYU is a large university with multiple schools offering graduate and professional programs. 2. Historically, NYU has reported approximately 58,000 students in total enrollment, with a significant proportion being graduate and professional students. 3. Based on historical ratios, graduate and professional students typically m…	Multiplication	Out
chapmanuniversity	TITLE: looking for Chapman University students to participate in a research survey about Latin students Hey there! I'm a master's student at NYU, and I'm currently working on my research thesis. I'm investigating the relationship between **self-efficacy and academic performance in Hispanic and Latino/a students**. I'm really interested in understanding how our community navigates the academic env…	I'm a master's student at NYU	education	Percentage of graduate and professional students at NYU that are master's students	2	[]	ChatGPT	Yes	No	Medium	0.7	0.8885	Yes	https://www.nyu.edu/about/news-publications/nyu-at-a-glance.html#:~:text=Total:%2021%2C776,Professional:%201%2C021	Feasible	To estimate the percentage of graduate and professional students at NYU who are master's students: 1. NYU offers a wide range of graduate programs, including master's, doctoral, and professional degrees. 2. Historical data from large universities suggests that master's students generally make up the majority of graduate and professional enrollment. Estimates often range from 65% to 75% of the tot…	Multiplication	Out
chapmanuniversity	TITLE: looking for Chapman University students to participate in a research survey about Latin students Hey there! I'm a master's student at NYU, and I'm currently working on my research thesis. I'm investigating the relationship between **self-efficacy and academic performance in Hispanic and Latino/a students**. I'm really interested in understanding how our community navigates the academic env…	Elena Marlowe	name	Percentage of US population with the first name Elena	3	[1,2]	ChatGPT	Yes	Yes	High	0.001	0.0003	Yes	https://www.mynamestats.com/First-Names/E/EL/ELENA/index.html	Feasible	To estimate the percentage of the US population with the first name Elena: 1. Elena is a relatively common name in the United States but not among the top names. Based on historical name popularity data, names ranked similarly are given to roughly 0.1% to 0.2% of the population. 2. Considering a U.S. population of approximately 330 million, this would place the number of people named Elena at aro…	Multiplication	Out
chapmanuniversity	TITLE: looking for Chapman University students to participate in a research survey about Latin students Hey there! I'm a master's student at NYU, and I'm currently working on my research thesis. I'm investigating the relationship between **self-efficacy and academic performance in Hispanic and Latino/a students**. I'm really interested in understanding how our community navigates the academic env…	Elena Marlowe	name	Percentage of US population with the last name Marlowe	4	[1,2,3]	ChatGPT	Yes	Yes	High	5e-05	2.2e-05	Yes	https://discover.23andme.com/last-name/Marlowe	Feasible	To estimate the percentage of the US population with the last name Marlowe: 1. Marlowe is a relatively uncommon surname in the United States. 2. Based on surname frequency data, uncommon surnames typically occur in about 0.001% to 0.01% of the US population. 3. Assuming a population of approximately 330 million, this range suggests between 3,300 and 33,000 individuals with the last name Marlowe. …	Multiplication	Out

## Sheet: Ordering 2
Subreddit	Post	Disclosure (Ordering)	Disclosure Category	Query	ID	Conditionally Independent?	Source Used	Succeeded?	Reliable?	Annotator Confidence	Value	Ground Truth	Ground Truth Reliability	Ground Truth Source	Disclosure Type	ChatGPT Response	Operation	Parentheses
chapmanuniversity	TITLE: looking for Chapman University students to participate in a research survey about Latin students Hey there! I'm a master's student at NYU, and I'm currently working on my research thesis. I'm investigating the relationship between **self-efficacy and academic performance in Hispanic and Latino/a students**. I'm really interested in understanding how our community navigates the academic env…	I'm a master's student at NYU	education	Number of graduate and professional students at NYU	1	[]	ChatGPT	Yes	No	High	26100	29760	Yes	https://www.nyu.edu/about/news-publications/nyu-at-a-glance.html#:~:text=Total:%2021%2C776,Professional:%201%2C021	Feasible	To estimate the number of graduate and professional students at NYU: 1. NYU is a large university with multiple schools offering graduate and professional programs. 2. Historically, NYU has reported approximately 58,000 students in total enrollment, with a significant proportion being graduate and professional students. 3. Based on historical ratios, graduate and professional students typically m…	Multiplication	Out
chapmanuniversity	TITLE: looking for Chapman University students to participate in a research survey about Latin students Hey there! I'm a master's student at NYU, and I'm currently working on my research thesis. I'm investigating the relationship between **self-efficacy and academic performance in Hispanic and Latino/a students**. I'm really interested in understanding how our community navigates the academic env…	I'm a master's student at NYU	education	Percentage of graduate and professional students at NYU that are master's students	2	[]	ChatGPT	Yes	No	Medium	0.7	0.8885	Yes	https://www.nyu.edu/about/news-publications/nyu-at-a-glance.html#:~:text=Total:%2021%2C776,Professional:%201%2C021	Feasible	To estimate the percentage of graduate and professional students at NYU who are master's students: 1. NYU offers a wide range of graduate programs, including master's, doctoral, and professional degrees. 2. Historical data from large universities suggests that master's students generally make up the majority of graduate and professional enrollment. Estimates often range from 65% to 75% of the tot…	Multiplication	Out
chapmanuniversity	TITLE: looking for Chapman University students to participate in a research survey about Latin students Hey there! I'm a master's student at NYU, and I'm currently working on my research thesis. I'm investigating the relationship between **self-efficacy and academic performance in Hispanic and Latino/a students**. I'm really interested in understanding how our community navigates the academic env…	our community	race_nationality	Percentage of students at NYU that are Hispanic/Latino	3	[1,2]	ChatGPT	Yes	No	Low	0.225	0.122	Yes	https://datausa.io/profile/university/new-york-university	Feasible	To estimate the percentage of students at NYU that are Hispanic/Latino: 1. NYU is known for its diversity and reports demographic data regularly. Based on national trends and NYU's diversity initiatives, the percentage of Hispanic/Latino students is likely above the national average for universities. 2. The national average for Hispanic/Latino enrollment in higher education is around 20%. NYU, be…	Multiplication	Out
chapmanuniversity	TITLE: looking for Chapman University students to participate in a research survey about Latin students Hey there! I'm a master's student at NYU, and I'm currently working on my research thesis. I'm investigating the relationship between **self-efficacy and academic performance in Hispanic and Latino/a students**. I'm really interested in understanding how our community navigates the academic env…	self-efficacy and academic performance in Hispanic and Latino/a students	education	Percentage of masters's students at NYU that are in the Latin American and Caribbean Studies degree program	4	[1,3]	ChatGPT	Yes	Yes	High	0.0015	0.0011	Yes	https://www.petersons.com/graduate-schools/new-york-university-center-for-latin-american-and-caribbean-studies-000_10039668.aspx	Feasible	To estimate the percentage of master's students at NYU in the Latin American and Caribbean Studies degree program: 1. NYU offers numerous master's degree programs across various disciplines, with tens of thousands of master's students in total. 2. Specialized programs like Latin American and Caribbean Studies typically have small enrollment numbers, often ranging from 20 to 50 students per year. …	Multiplication	Out
chapmanuniversity	TITLE: looking for Chapman University students to participate in a research survey about Latin students Hey there! I'm a master's student at NYU, and I'm currently working on my research thesis. I'm investigating the relationship between **self-efficacy and academic performance in Hispanic and Latino/a students**. I'm really interested in understanding how our community navigates the academic env…	Elena Marlowe	name	Percentage of US population with the first name Elena	5	[1,2,3,4]	ChatGPT	Yes	Yes	High	0.001	0.0003	Yes	https://www.mynamestats.com/First-Names/E/EL/ELENA/index.html	Feasible	To estimate the percentage of the US population with the first name Elena: 1. Elena is a relatively common name in the United States but not among the top names. Based on historical name popularity data, names ranked similarly are given to roughly 0.1% to 0.2% of the population. 2. Considering a U.S. population of approximately 330 million, this would place the number of people named Elena at aro…	Multiplication	Out
chapmanuniversity	TITLE: looking for Chapman University students to participate in a research survey about Latin students Hey there! I'm a master's student at NYU, and I'm currently working on my research thesis. I'm investigating the relationship between **self-efficacy and academic performance in Hispanic and Latino/a students**. I'm really interested in understanding how our community navigates the academic env…	Elena Marlowe	name	Percentage of US population with the last name Marlowe	6	[1,2,3,4,5]	ChatGPT	Yes	Yes	High	5e-05	2.2e-05	Yes	https://discover.23andme.com/last-name/Marlowe	Feasible	To estimate the percentage of the US population with the last name Marlowe: 1. Marlowe is a relatively uncommon surname in the United States. 2. Based on surname frequency data, uncommon surnames typically occur in about 0.001% to 0.01% of the US population. 3. Assuming a population of approximately 330 million, this range suggests between 3,300 and 33,000 individuals with the last name Marlowe. …	Multiplication	Out
