# Supplementary material
Source: ML conference proceedings conference paper supplement (https://openreview.net/forum?id=HMVQ00vabY)
Supplement: supplementary_material [file 18.xlsx]

## Sheet: Ordering 1
Subreddit	Post	Disclosure (Ordering)	Disclosure Category	Query	ID	Conditionally Independent?	Source Used	Succeeded?	Reliable?	Annotator Confidence	Value	Ground Truth	Ground Truth Reliability	Ground Truth Source	Disclosure Type	ChatGPT Response	Operation	Parentheses
twoxchromosomes	TITLE: feeling conflicted about unexpected pregnancy I'm 32f and pregnant. I've been with my husband for a few years, and we've always been on the same page about not wanting kids. But now that I'm actually pregnant, things have changed. He wants kids, but I'm not so sure. I've been feeling really anxious about the whole situation. I'm scared of what's ahead and I don't know if I'm ready to be a …	32f	age_gender	number of 32 year old women in the US	1	[]	ChatGPT	Yes	Yes	High	1650000	2377790	Yes	https://www.census.gov/popclock/data_tables.php?component=pyramid	Feasible	To estimate the number of 32-year-old women in the United States, we assume that women make up about 50% of the population and that each age cohort represents approximately 1% of the total population. With a U.S. population of approximately 330 million: 330,000,000×0.5× 1/100 =1,650,000 <answer>1650000</answer> Confidence score: 0.9	Multiplication	Out
twoxchromosomes	TITLE: feeling conflicted about unexpected pregnancy I'm 32f and pregnant. I've been with my husband for a few years, and we've always been on the same page about not wanting kids. But now that I'm actually pregnant, things have changed. He wants kids, but I'm not so sure. I've been feeling really anxious about the whole situation. I'm scared of what's ahead and I don't know if I'm ready to be a …	my husband	mental_health	percentage of people in the US that are married	2	[1]	ChatGPT	Yes	Yes	High	0.52	0.46	Yes	https://www.census.gov/library/stories/2023/05/family-households-still-the-majority.html#:~:text=Among%20family%20households%2C%20the%20share,%2C%20and%2046%25%20in%202020.	Feasible	According to recent statistics, approximately 50-55% of people in the United States are currently married. This percentage has been declining over the decades due to changing social norms and trends in delayed marriage or cohabitation. A reasonable estimate is: <answer>52</answer> Confidence score: 0.9	Multiplication	Out
twoxchromosomes	TITLE: feeling conflicted about unexpected pregnancy I'm 32f and pregnant. I've been with my husband for a few years, and we've always been on the same page about not wanting kids. But now that I'm actually pregnant, things have changed. He wants kids, but I'm not so sure. I've been feeling really anxious about the whole situation. I'm scared of what's ahead and I don't know if I'm ready to be a …	not wanting kids	reproductive_health	percentage of 32 year old women that don't want kids	3	[2]	ChatGPT	Yes	Yes	High	0.18	0.21	Yes	https://www.cbc.ca/news/canada/women-children-study-1.7119845#:~:text=Just%20over%20one%2Dfifth%20(21,45%20per%20cent%20of%20women.	Feasible	Research indicates that around 15-20% of women in their early 30s do not want children. This percentage includes those who are child-free by choice or who have decided not to have children due to personal, financial, or medical reasons. A reasonable estimate is: <answer>18</answer> Confidence score: 0.85	Multiplication	Out
twoxchromosomes	TITLE: feeling conflicted about unexpected pregnancy I'm 32f and pregnant. I've been with my husband for a few years, and we've always been on the same page about not wanting kids. But now that I'm actually pregnant, things have changed. He wants kids, but I'm not so sure. I've been feeling really anxious about the whole situation. I'm scared of what's ahead and I don't know if I'm ready to be a …	pregnant	reproductive_health	percentage of 32 year old women in the US that are pregnant	4	[2, 3]	ChatGPT	Yes	Yes	High	0.1	0.0756	Yes	https://www.marchofdimes.org/peristats/data?reg=99&top=2&stop=2&lev=1&slev=1&obj=1	Feasible	Among women in their early 30s, pregnancy rates are relatively high compared to other age groups, as this is a common time for family planning. Data suggests that approximately 8-12% of 32-year-old women in the U.S. are pregnant at any given time, depending on factors like socioeconomic background and marital status. A reasonable estimate is: <answer>10</answer> Confidence score: 0.85	Multiplication	Out
twoxchromosomes	TITLE: feeling conflicted about unexpected pregnancy I'm 32f and pregnant. I've been with my husband for a few years, and we've always been on the same page about not wanting kids. But now that I'm actually pregnant, things have changed. He wants kids, but I'm not so sure. I've been feeling really anxious about the whole situation. I'm scared of what's ahead and I don't know if I'm ready to be a …	really anxious	mental_health	percentage of pregnant women that experience anxiety	5	[1, 2, 3]	ChatGPT	Yes	No	High	0.2	0.7	Yes	https://pmc.ncbi.nlm.nih.gov/articles/PMC10707410/#:~:text=Around%2020%25%20of%20pregnant%20women,disorder%20%5B25%2C26%5D.	Feasible	Research suggests that anxiety is a common issue during pregnancy, with estimates indicating that 15-25% of pregnant women experience significant anxiety. This prevalence can vary depending on factors such as socioeconomic status, previous mental health history, and levels of support. A reasonable estimate is: <answer>20</answer> Confidence score: 0.9	Multiplication	Out
twoxchromosomes	TITLE: feeling conflicted about unexpected pregnancy I'm 32f and pregnant. I've been with my husband for a few years, and we've always been on the same page about not wanting kids. But now that I'm actually pregnant, things have changed. He wants kids, but I'm not so sure. I've been feeling really anxious about the whole situation. I'm scared of what's ahead and I don't know if I'm ready to be a …	contemplating abortion	reproductive_health	percentage of pregnant women in the US that get an abortion	6	[1, 2, 3, 5]	ChatGPT	Yes	Yes	High	0.185	0.178	Yes	https://www.cdc.gov/mmwr/volumes/71/ss/ss7110a1.htm	Feasible	To estimate the percentage of pregnant women in the U.S. who get an abortion, we can refer to the overall abortion statistics. According to the Guttmacher Institute, about 18-19% of pregnancies in the U.S. end in abortion. Thus, the estimated percentage of pregnant women in the U.S. that get an abortion is: <answer>18.5</answer> Confidence score: 0.85	Multiplication	Out
twoxchromosomes	TITLE: feeling conflicted about unexpected pregnancy I'm 32f and pregnant. I've been with my husband for a few years, and we've always been on the same page about not wanting kids. But now that I'm actually pregnant, things have changed. He wants kids, but I'm not so sure. I've been feeling really anxious about the whole situation. I'm scared of what's ahead and I don't know if I'm ready to be a …	We're not in a good financial position	finance	percentage of abortions done by low-income patients	7	[1, 2, 3, 5, 6]	ChatGPT	Yes	No	High	0.65	0.75	Yes	https://www.guttmacher.org/gpr/2016/07/abortion-lives-women-struggling-financially-why-insurance-coverage-matters	Feasible	Studies consistently show that a significant majority of abortion patients in the United States are low-income individuals. Approximately 50-75% of abortions are obtained by patients with incomes at or below 200% of the federal poverty level. A reasonable estimate is: <answer>65</answer> Confidence score: 0.9	Multiplication	Out

## Sheet: Ordering 2
Subreddit	Post	Disclosure (Ordering)	Disclosure Category	Query	ID	Conditionally Independent?	Source Used	Succeeded?	Reliable?	Annotator Confidence	Value	Ground Truth	Ground Truth Reliability	Ground Truth Source	Disclosure Type	ChatGPT Response	Operation	Parentheses
twoxchromosomes	TITLE: feeling conflicted about unexpected pregnancy I'm 32f and pregnant. I've been with my husband for a few years, and we've always been on the same page about not wanting kids. But now that I'm actually pregnant, things have changed. He wants kids, but I'm not so sure. I've been feeling really anxious about the whole situation. I'm scared of what's ahead and I don't know if I'm ready to be a …	32f	age_gender	number of 32 year old women in the US	1	[]	ChatGPT	Yes	Yes	High	1650000	2377790	Yes	https://www.census.gov/popclock/data_tables.php?component=pyramid	Feasible	To estimate the number of 32-year-old women in the United States, we assume that women make up about 50% of the population and that each age cohort represents approximately 1% of the total population. With a U.S. population of approximately 330 million: 330,000,000×0.5× 1/100 =1,650,000 <answer>1650000</answer> Confidence score: 0.9	Multiplication	Out
twoxchromosomes	TITLE: feeling conflicted about unexpected pregnancy I'm 32f and pregnant. I've been with my husband for a few years, and we've always been on the same page about not wanting kids. But now that I'm actually pregnant, things have changed. He wants kids, but I'm not so sure. I've been feeling really anxious about the whole situation. I'm scared of what's ahead and I don't know if I'm ready to be a …	my husband	mental_health	percentage of people in the US that are married	2	[1]	ChatGPT	Yes	Yes	High	0.52	0.46	Yes	https://www.census.gov/library/stories/2023/05/family-households-still-the-majority.html#:~:text=Among%20family%20households%2C%20the%20share,%2C%20and%2046%25%20in%202020.	Feasible	According to recent statistics, approximately 50-55% of people in the United States are currently married. This percentage has been declining over the decades due to changing social norms and trends in delayed marriage or cohabitation. A reasonable estimate is: <answer>52</answer> Confidence score: 0.9	Multiplication	Out
twoxchromosomes	TITLE: feeling conflicted about unexpected pregnancy I'm 32f and pregnant. I've been with my husband for a few years, and we've always been on the same page about not wanting kids. But now that I'm actually pregnant, things have changed. He wants kids, but I'm not so sure. I've been feeling really anxious about the whole situation. I'm scared of what's ahead and I don't know if I'm ready to be a …	not wanting kids	reproductive_health	percentage of 32 year old women that don't want kids	3	[2]	ChatGPT	Yes	Yes	High	0.18	0.21	Yes	https://www.cbc.ca/news/canada/women-children-study-1.7119845#:~:text=Just%20over%20one%2Dfifth%20(21,45%20per%20cent%20of%20women.	Feasible	Research indicates that around 15-20% of women in their early 30s do not want children. This percentage includes those who are child-free by choice or who have decided not to have children due to personal, financial, or medical reasons. A reasonable estimate is: <answer>18</answer> Confidence score: 0.85	Multiplication	Out
twoxchromosomes	TITLE: feeling conflicted about unexpected pregnancy I'm 32f and pregnant. I've been with my husband for a few years, and we've always been on the same page about not wanting kids. But now that I'm actually pregnant, things have changed. He wants kids, but I'm not so sure. I've been feeling really anxious about the whole situation. I'm scared of what's ahead and I don't know if I'm ready to be a …	pregnant	reproductive_health	percentage of 32 year old women in the US that are pregnant	4	[2, 3]	ChatGPT	Yes	Yes	High	0.1	0.0756	Yes	https://www.marchofdimes.org/peristats/data?reg=99&top=2&stop=2&lev=1&slev=1&obj=1	Feasible	Among women in their early 30s, pregnancy rates are relatively high compared to other age groups, as this is a common time for family planning. Data suggests that approximately 8-12% of 32-year-old women in the U.S. are pregnant at any given time, depending on factors like socioeconomic background and marital status. A reasonable estimate is: <answer>10</answer> Confidence score: 0.85	Multiplication	Out
twoxchromosomes	TITLE: feeling conflicted about unexpected pregnancy I'm 32f and pregnant. I've been with my husband for a few years, and we've always been on the same page about not wanting kids. But now that I'm actually pregnant, things have changed. He wants kids, but I'm not so sure. I've been feeling really anxious about the whole situation. I'm scared of what's ahead and I don't know if I'm ready to be a …	really anxious	mental_health	percentage of pregnant women that experience anxiety	5	[1, 2, 3]	ChatGPT	Yes	No	High	0.2	0.7	Yes	https://pmc.ncbi.nlm.nih.gov/articles/PMC10707410/#:~:text=Around%2020%25%20of%20pregnant%20women,disorder%20%5B25%2C26%5D.	Feasible	Research suggests that anxiety is a common issue during pregnancy, with estimates indicating that 15-25% of pregnant women experience significant anxiety. This prevalence can vary depending on factors such as socioeconomic status, previous mental health history, and levels of support. A reasonable estimate is: <answer>20</answer> Confidence score: 0.9	Multiplication	Out
twoxchromosomes	TITLE: feeling conflicted about unexpected pregnancy I'm 32f and pregnant. I've been with my husband for a few years, and we've always been on the same page about not wanting kids. But now that I'm actually pregnant, things have changed. He wants kids, but I'm not so sure. I've been feeling really anxious about the whole situation. I'm scared of what's ahead and I don't know if I'm ready to be a …	We're not in a good financial position	finance	percentage of people in the US that are low income	6	[1, 2, 3, 4, 5]	ChatGPT	Yes	Yes	High	0.3	0.269	Yes	https://www.census.gov/data/tables/time-series/demo/income-poverty/cps-pov/pov-01.html#par_textimage_30	Feasible	In the United States, "low income" is typically defined as households earning less than 200% of the federal poverty level (FPL). Based on recent data, approximately 29-31% of people in the U.S. fall into the low-income category. A reasonable estimate is: <answer>30</answer> Confidence score: 0.9	Multiplication	Out
