# Supplementary material
Source: ML conference proceedings conference paper supplement (https://openreview.net/forum?id=HMVQ00vabY)
Supplement: supplementary_material [file 18.xlsx]

## Sheet: Ordering 1
Subreddit	Post	Disclosure (Ordering)	Disclosure Category	Query	ID	Conditionally Independent?	Source Used	Succeeded?	Reliable?	Annotator Confidence	Value	Ground Truth	Ground Truth Reliability	Ground Truth Source	Disclosure Type	ChatGPT Response	Operation	Parentheses
chapmanuniversity	TITLE: freaking out about housing hey all, i just transferred here from a ccc and im in panicking. i'm a freshmen rn with a service dog and the main thing im stressing about is finding a place to live. im scared ill be put in a triple with roommates that don't understand my dog needs. ik chapman has disability services but idk how this will work out. anyone else in a similar situation? its hard i…	chapmanuniversity, i just transferred here	education	Number of students that transfer to Chapman University in a single year	1	[]	ChatGPT	Yes	No	Medium	1200	955	Yes	https://www.campusreel.org/how-to-transfer-colleges/chapman-university-transfer-requirements#:~:text=In%202019%2C%20Chapman%20University%20(CU,The%20school%20accepted%20955%20students.	Feasible	To estimate the number of students that transfer to Chapman University in a single year: 1. Chapman University is a medium-sized private university, with a total enrollment of around 10,000 students. 2. Transfer students typically account for a smaller percentage of total enrollment at private universities. For similar institutions, transfer students often comprise around 10-15% of total enrollme…	Multiplication	Out
chapmanuniversity	TITLE: freaking out about housing hey all, i just transferred here from a ccc and im in panicking. i'm a freshmen rn with a service dog and the main thing im stressing about is finding a place to live. im scared ill be put in a triple with roommates that don't understand my dog needs. ik chapman has disability services but idk how this will work out. anyone else in a similar situation? its hard i…	i'm a freshmen	education	Percentage of students at Chapman University that are freshmen	2	[1]	ChatGPT	Yes	Yes	High	0.225	0.2096	Yes	https://www.chapman.edu/	Feasible	To estimate the percentage of students at Chapman University that are freshmen: 1. Chapman University, like most traditional universities, typically has a significant proportion of undergraduate students. Freshmen generally make up the majority of the first-year undergraduate cohort. 2. At many similar institutions, freshmen account for approximately 20-25% of the total student body. 3. Assuming …	Multiplication	Out
chapmanuniversity	TITLE: freaking out about housing hey all, i just transferred here from a ccc and im in panicking. i'm a freshmen rn with a service dog and the main thing im stressing about is finding a place to live. im scared ill be put in a triple with roommates that don't understand my dog needs. ik chapman has disability services but idk how this will work out. anyone else in a similar situation? its hard i…	ik chapman has disability services	health	Percentage of undergraduate students at Chapman University that have a disability	3	[1,2]	ChatGPT	Yes	Yes	High	0.1	0.1651	Yes	https://www.chapman.edu/admission/undergraduate/dei/disability-resources.aspx#:~:text=Yes!,help%20you%20succeed%20at%20Chapman.	Feasible	To estimate the percentage of undergraduate students at Chapman University that have a disability: 1. Nationally, the percentage of undergraduate students reporting disabilities in higher education institutions ranges from 10% to 15%, according to U.S. Department of Education data. 2. Private universities like Chapman typically fall on the lower end of this spectrum due to differences in populati…	Multiplication	Out
chapmanuniversity	TITLE: freaking out about housing hey all, i just transferred here from a ccc and im in panicking. i'm a freshmen rn with a service dog and the main thing im stressing about is finding a place to live. im scared ill be put in a triple with roommates that don't understand my dog needs. ik chapman has disability services but idk how this will work out. anyone else in a similar situation? its hard i…	with a service dog	health	Percentage of US population with a disability that has a service dog	4	[1,2]	ChatGPT	Yes	Yes	High	0.015	0.01	Yes	https://pmc.ncbi.nlm.nih.gov/articles/PMC10670951/#:~:text=Over%2061%20million%20people%20in,person%20and%20support%20their%20independence.	Feasible	To estimate the percentage of the US population with a disability that has a service dog: 1. Approximately 12% of the US population has a disability (around 40 million people). 2. Among people with disabilities, only a small fraction requires or uses a service dog. Estimates suggest that around 1-2% of individuals with disabilities have a service dog. 3. Using an average estimate of 1.5%: \[ \tex…	Multiplication	Out

## Sheet: Ordering 2
Subreddit	Post	Disclosure (Ordering)	Disclosure Category	Query	ID	Conditionally Independent?	Source Used	Succeeded?	Reliable?	Annotator Confidence	Value	Ground Truth	Ground Truth Reliability	Ground Truth Source	Disclosure Type	ChatGPT Response	Operation	Parentheses
chapmanuniversity	TITLE: freaking out about housing hey all, i just transferred here from a ccc and im in panicking. i'm a freshmen rn with a service dog and the main thing im stressing about is finding a place to live. im scared ill be put in a triple with roommates that don't understand my dog needs. ik chapman has disability services but idk how this will work out. anyone else in a similar situation? its hard i…	chapmanuniversity, i just transferred here	education	Number of students that transfer to Chapman University in a single year	1	[]	ChatGPT	Yes	No	Medium	1200	955	Yes	https://www.campusreel.org/how-to-transfer-colleges/chapman-university-transfer-requirements#:~:text=In%202019%2C%20Chapman%20University%20(CU,The%20school%20accepted%20955%20students.	Feasible	To estimate the number of students that transfer to Chapman University in a single year: 1. Chapman University is a medium-sized private university, with a total enrollment of around 10,000 students. 2. Transfer students typically account for a smaller percentage of total enrollment at private universities. For similar institutions, transfer students often comprise around 10-15% of total enrollme…	Multiplication	Out
chapmanuniversity	TITLE: freaking out about housing hey all, i just transferred here from a ccc and im in panicking. i'm a freshmen rn with a service dog and the main thing im stressing about is finding a place to live. im scared ill be put in a triple with roommates that don't understand my dog needs. ik chapman has disability services but idk how this will work out. anyone else in a similar situation? its hard i…	i'm a freshmen	education	Percentage of students at Chapman University that are freshmen	2	[1]	ChatGPT	Yes	Yes	High	0.225	0.2096	Yes	https://www.chapman.edu/	Feasible	To estimate the percentage of students at Chapman University that are freshmen: 1. Chapman University, like most traditional universities, typically has a significant proportion of undergraduate students. Freshmen generally make up the majority of the first-year undergraduate cohort. 2. At many similar institutions, freshmen account for approximately 20-25% of the total student body. 3. Assuming …	Multiplication	Out
chapmanuniversity	TITLE: freaking out about housing hey all, i just transferred here from a ccc and im in panicking. i'm a freshmen rn with a service dog and the main thing im stressing about is finding a place to live. im scared ill be put in a triple with roommates that don't understand my dog needs. ik chapman has disability services but idk how this will work out. anyone else in a similar situation? its hard i…	i'm trying to find a place off campus	location	Percentage of students at Chapman University that live off-campus	3	[1,2]	ChatGPT	Yes	Yes	High	0.55	0.55	Yes	https://www.usnews.com/best-colleges/chapman-university-1164/student-life#:~:text=Chapman%20University%20has%20a%20total,of%20students%20live%20off%20campus.	Feasible	To estimate the percentage of students at Chapman University that live off-campus: 1. Chapman University is a private institution with a mix of residential and commuter students. Like many universities, it provides on-campus housing but cannot accommodate all students. 2. Based on similar institutions, approximately 50-60% of students often live off-campus, especially upperclassmen and graduate s…	Multiplication	Out
chapmanuniversity	TITLE: freaking out about housing hey all, i just transferred here from a ccc and im in panicking. i'm a freshmen rn with a service dog and the main thing im stressing about is finding a place to live. im scared ill be put in a triple with roommates that don't understand my dog needs. ik chapman has disability services but idk how this will work out. anyone else in a similar situation? its hard i…	ik chapman has disability services	health	Percentage of undergraduate students at Chapman University that have a disability	4	[1,2,3]	ChatGPT	Yes	Yes	High	0.1	0.1651	Yes	https://www.chapman.edu/admission/undergraduate/dei/disability-resources.aspx#:~:text=Yes!,help%20you%20succeed%20at%20Chapman.	Feasible	To estimate the percentage of undergraduate students at Chapman University that have a disability: 1. Nationally, the percentage of undergraduate students reporting disabilities in higher education institutions ranges from 10% to 15%, according to U.S. Department of Education data. 2. Private universities like Chapman typically fall on the lower end of this spectrum due to differences in populati…	Multiplication	Out
chapmanuniversity	TITLE: freaking out about housing hey all, i just transferred here from a ccc and im in panicking. i'm a freshmen rn with a service dog and the main thing im stressing about is finding a place to live. im scared ill be put in a triple with roommates that don't understand my dog needs. ik chapman has disability services but idk how this will work out. anyone else in a similar situation? its hard i…	with a service dog	health	Percentage of US population with a disability that has a service dog	5	[1,2,3]	ChatGPT	Yes	Yes	High	0.015	0.01	Yes	https://pmc.ncbi.nlm.nih.gov/articles/PMC10670951/#:~:text=Over%2061%20million%20people%20in,person%20and%20support%20their%20independence.	Feasible	To estimate the percentage of the US population with a disability that has a service dog: 1. Approximately 12% of the US population has a disability (around 40 million people). 2. Among people with disabilities, only a small fraction requires or uses a service dog. Estimates suggest that around 1-2% of individuals with disabilities have a service dog. 3. Using an average estimate of 1.5%: \[ \tex…	Multiplication	Out

## Sheet: Ordering 3
Subreddit	Post	Disclosure (Ordering)	Disclosure Category	Query	ID	Conditionally Independent?	Source Used	Succeeded?	Reliable?	Annotator Confidence	Value	Ground Truth	Ground Truth Reliability	Ground Truth Source	Disclosure Type	ChatGPT Response	Operation	Parentheses
chapmanuniversity	TITLE: freaking out about housing hey all, i just transferred here from a ccc and im in panicking. i'm a freshmen rn with a service dog and the main thing im stressing about is finding a place to live. im scared ill be put in a triple with roommates that don't understand my dog needs. ik chapman has disability services but idk how this will work out. anyone else in a similar situation? its hard i…	i just transferred here from a ccc	education	Number of students who transfer from a California community college to a private institution in a single year	1	[]	ChatGPT	Yes	No	Low	18000	42780	Yes	https://www.cccco.edu/About-Us/Chancellors-Office/Divisions/Digital-Innovation-and-Infrastructure/research-data-analytics/data-snapshot/student-outcomes	Feasible	**Thought Process**: California community colleges have a robust transfer system, but most students transfer to public universities within the state (e.g., CSU or UC systems). Transfers to private institutions, while less common, still occur. Data suggests that approximately **15,000 to 20,000** students transfer annually from California community colleges to private institutions, including both …	Multiplication	Begin
chapmanuniversity	TITLE: freaking out about housing hey all, i just transferred here from a ccc and im in panicking. i'm a freshmen rn with a service dog and the main thing im stressing about is finding a place to live. im scared ill be put in a triple with roommates that don't understand my dog needs. ik chapman has disability services but idk how this will work out. anyone else in a similar situation? its hard i…	i just transferred here from a ccc	education	Number of private colleges in California	2	[]	ChatGPT	Yes	No	Low	175	150	Yes	https://www.ppic.org/publication/californias-higher-education-system/	Feasible	**Thought Process**: California is home to many private colleges and universities, ranging from small liberal arts schools to large research institutions. Based on data from educational organizations and reports, there are approximately **150 to 200** private colleges in the state. A reasonable estimate is **175**. **Confidence Score**: 0.85 <answer>175</answer>	(Division, 1)	In
chapmanuniversity	TITLE: freaking out about housing hey all, i just transferred here from a ccc and im in panicking. i'm a freshmen rn with a service dog and the main thing im stressing about is finding a place to live. im scared ill be put in a triple with roommates that don't understand my dog needs. ik chapman has disability services but idk how this will work out. anyone else in a similar situation? its hard i…	i'm a freshmen	education	Percentage of students at Chapman University that are freshmen	3	[1,2]	ChatGPT	Yes	Yes	High	0.225	0.2096	Yes	https://www.chapman.edu/	Feasible	To estimate the percentage of students at Chapman University that are freshmen: 1. Chapman University, like most traditional universities, typically has a significant proportion of undergraduate students. Freshmen generally make up the majority of the first-year undergraduate cohort. 2. At many similar institutions, freshmen account for approximately 20-25% of the total student body. 3. Assuming …	Multiplication	Out
chapmanuniversity	TITLE: freaking out about housing hey all, i just transferred here from a ccc and im in panicking. i'm a freshmen rn with a service dog and the main thing im stressing about is finding a place to live. im scared ill be put in a triple with roommates that don't understand my dog needs. ik chapman has disability services but idk how this will work out. anyone else in a similar situation? its hard i…	ik chapman has disability services	health	Percentage of undergraduate students at Chapman University that have a disability	4	[1,2,3]	ChatGPT	Yes	Yes	High	0.1	0.1651	Yes	https://www.chapman.edu/admission/undergraduate/dei/disability-resources.aspx#:~:text=Yes!,help%20you%20succeed%20at%20Chapman.	Feasible	To estimate the percentage of undergraduate students at Chapman University that have a disability: 1. Nationally, the percentage of undergraduate students reporting disabilities in higher education institutions ranges from 10% to 15%, according to U.S. Department of Education data. 2. Private universities like Chapman typically fall on the lower end of this spectrum due to differences in populati…	Multiplication	Out
chapmanuniversity	TITLE: freaking out about housing hey all, i just transferred here from a ccc and im in panicking. i'm a freshmen rn with a service dog and the main thing im stressing about is finding a place to live. im scared ill be put in a triple with roommates that don't understand my dog needs. ik chapman has disability services but idk how this will work out. anyone else in a similar situation? its hard i…	with a service dog	health	Percentage of US population with a disability that has a service dog	5	[1,2,3,4]	ChatGPT	Yes	Yes	High	0.015	0.01	Yes	https://pmc.ncbi.nlm.nih.gov/articles/PMC10670951/#:~:text=Over%2061%20million%20people%20in,person%20and%20support%20their%20independence.	Feasible	To estimate the percentage of the US population with a disability that has a service dog: 1. Approximately 12% of the US population has a disability (around 40 million people). 2. Among people with disabilities, only a small fraction requires or uses a service dog. Estimates suggest that around 1-2% of individuals with disabilities have a service dog. 3. Using an average estimate of 1.5%: \[ \tex…	Multiplication	Out
