# Supplementary material
Source: ML conference proceedings conference paper supplement (https://openreview.net/forum?id=HMVQ00vabY)
Supplement: supplementary_material [file 19.xlsx]

## Sheet: Ordering 1
Subreddit	Post	Disclosure (Ordering)	Disclosure Category	Query	ID	Conditionally Independent?	Source Used	Succeeded?	Reliable?	Annotator Confidence	Value	Ground Truth	Ground Truth Reliability	Ground Truth Source	Disclosure Type	ChatGPT Response	Operation	Parentheses
chapmanuniversity	TITLE: Chapman LGBT Scene Hi! im a trans, lesbain girl in my second year at chapman. im looking to meet other queer people on campus but im having trouble finding my way around campus and meeting people. does anyone know any queer events/organisations that i can attend? i’m really looking forward to meeting other queer people on campus and joining any queer study groups or hangouts! Thank you so …	my second year at chapman	education	Number of undergraduate students at Chapman University	1	[]	ChatGPT	Yes	Yes	High	7500	7656	Yes	https://www.chapman.edu/about/facts-and-rankings/index.aspx	Feasible	To estimate the number of undergraduate students at Chapman University: 1. Chapman University is a mid-sized private university with a total enrollment of around 10,000 students. 2. Undergraduate students typically make up the majority of the student body at such institutions, generally around 70-80%. 3. Assuming approximately 75% of the total 10,000 students are undergraduates: \[ 10,000 \times …	Multiplication	Begin
chapmanuniversity	TITLE: Chapman LGBT Scene Hi! im a trans, lesbain girl in my second year at chapman. im looking to meet other queer people on campus but im having trouble finding my way around campus and meeting people. does anyone know any queer events/organisations that i can attend? i’m really looking forward to meeting other queer people on campus and joining any queer study groups or hangouts! Thank you so …	my second year at chapman	education	Number of undergraduate class levels	2	[]	ChatGPT	Yes	Yes	High	4	4	Yes		Feasible	Undergraduate education in most institutions, including universities worldwide, is typically divided into four class levels: 1. Freshman (1st year) 2. Sophomore (2nd year) 3. Junior (3rd year) 4. Senior (4th year) Thus, the total number of undergraduate class levels is 4. **Confidence Score**: 1.0 (based on standardized academic structure) <answer>4</answer>	(Division, 1)	In
chapmanuniversity	TITLE: Chapman LGBT Scene Hi! im a trans, lesbain girl in my second year at chapman. im looking to meet other queer people on campus but im having trouble finding my way around campus and meeting people. does anyone know any queer events/organisations that i can attend? i’m really looking forward to meeting other queer people on campus and joining any queer study groups or hangouts! Thank you so …	girl	gender	Percentage of undergraduate students at Chapman University who are women	3	[]	ChatGPT	Yes	Yes	High	0.58	0.61	Yes	https://www.collegefactual.com/colleges/chapman-university/student-life/diversity/	Feasible	To estimate the percentage of undergraduate students at Chapman University that are women: 1. Nationally, the percentage of women in undergraduate programs tends to be slightly over 50%, often ranging between 55% and 60%. 2. As a private university with a diverse student body, Chapman University likely follows similar trends. 3. A reasonable estimate for the percentage of undergraduate students a…	Multiplication	Out
chapmanuniversity	TITLE: Chapman LGBT Scene Hi! im a trans, lesbain girl in my second year at chapman. im looking to meet other queer people on campus but im having trouble finding my way around campus and meeting people. does anyone know any queer events/organisations that i can attend? i’m really looking forward to meeting other queer people on campus and joining any queer study groups or hangouts! Thank you so …	lesbain	sexual_orientation	Percentage of women in the US who are lesbian	4	[1,2]	ChatGPT	Yes	Yes	High	0.02	0.015	Yes	https://www.washingtonpost.com/news/volokh-conspiracy/wp/2014/07/15/what-percentage-of-the-u-s-population-is-gay-lesbian-or-bisexual/	Feasible	To estimate the percentage of women in the US who identify as lesbian: 1. Surveys on sexual orientation, such as those by Gallup and the Williams Institute, indicate that approximately 7% of adults in the US identify as part of the LGBTQ+ community. 2. Within this group, around 1.5% to 2% of the total population identify as lesbian, and women make up a significant portion of the LGBTQ+ population…	Multiplication	Out
chapmanuniversity	TITLE: Chapman LGBT Scene Hi! im a trans, lesbain girl in my second year at chapman. im looking to meet other queer people on campus but im having trouble finding my way around campus and meeting people. does anyone know any queer events/organisations that i can attend? i’m really looking forward to meeting other queer people on campus and joining any queer study groups or hangouts! Thank you so …	im a trans	gender	Percentage of US population that identifies as transgender	5	[1,2,3,4]	ChatGPT	Yes	Yes	High	0.0055	0.0114	Yes	https://usafacts.org/articles/what-percentage-of-the-us-population-is-transgender/	Feasible	To estimate the percentage of the US population that identifies as transgender: 1. Surveys and studies, such as those conducted by the Williams Institute and Gallup, indicate that approximately 0.5% to 0.6% of the US population identifies as transgender. 2. A reasonable midpoint estimate is 0.55%. **Confidence Score**: 0.9 (based on consistent data from multiple reliable sources) <answer>0.55</an…	Multiplication	Out

## Sheet: Ordering 2
Subreddit	Post	Disclosure (Ordering)	Disclosure Category	Query	ID	Conditionally Independent?	Source Used	Succeeded?	Reliable?	Annotator Confidence	Value	Ground Truth	Ground Truth Reliability	Ground Truth Source	Disclosure Type	ChatGPT Response	Operation	Parentheses
chapmanuniversity	TITLE: Chapman LGBT Scene Hi! im a trans, lesbain girl in my second year at chapman. im looking to meet other queer people on campus but im having trouble finding my way around campus and meeting people. does anyone know any queer events/organisations that i can attend? i’m really looking forward to meeting other queer people on campus and joining any queer study groups or hangouts! Thank you so …	my second year at chapman	education	Number of undergraduate students at Chapman University	1	[]	ChatGPT	Yes	Yes	High	7500	7656	Yes	https://www.chapman.edu/about/facts-and-rankings/index.aspx	Feasible	To estimate the number of undergraduate students at Chapman University: 1. Chapman University is a mid-sized private university with a total enrollment of around 10,000 students. 2. Undergraduate students typically make up the majority of the student body at such institutions, generally around 70-80%. 3. Assuming approximately 75% of the total 10,000 students are undergraduates: \[ 10,000 \times …	Multiplication	Begin
chapmanuniversity	TITLE: Chapman LGBT Scene Hi! im a trans, lesbain girl in my second year at chapman. im looking to meet other queer people on campus but im having trouble finding my way around campus and meeting people. does anyone know any queer events/organisations that i can attend? i’m really looking forward to meeting other queer people on campus and joining any queer study groups or hangouts! Thank you so …	my second year at chapman	education	Number of undergraduate class levels	2	[]	ChatGPT	Yes	Yes	High	4	4	Yes		Feasible	Undergraduate education in most institutions, including universities worldwide, is typically divided into four class levels: 1. Freshman (1st year) 2. Sophomore (2nd year) 3. Junior (3rd year) 4. Senior (4th year) Thus, the total number of undergraduate class levels is 4. **Confidence Score**: 1.0 (based on standardized academic structure) <answer>4</answer>	(Division, 1)	In
chapmanuniversity	TITLE: Chapman LGBT Scene Hi! im a trans, lesbain girl in my second year at chapman. im looking to meet other queer people on campus but im having trouble finding my way around campus and meeting people. does anyone know any queer events/organisations that i can attend? i’m really looking forward to meeting other queer people on campus and joining any queer study groups or hangouts! Thank you so …	girl	gender	Percentage of undergraduate students at Chapman University who are women	3	[]	ChatGPT	Yes	Yes	High	0.58	0.61	Yes	https://www.collegefactual.com/colleges/chapman-university/student-life/diversity/	Feasible	To estimate the percentage of undergraduate students at Chapman University that are women: 1. Nationally, the percentage of women in undergraduate programs tends to be slightly over 50%, often ranging between 55% and 60%. 2. As a private university with a diverse student body, Chapman University likely follows similar trends. 3. A reasonable estimate for the percentage of undergraduate students a…	Multiplication	Out
chapmanuniversity	TITLE: Chapman LGBT Scene Hi! im a trans, lesbain girl in my second year at chapman. im looking to meet other queer people on campus but im having trouble finding my way around campus and meeting people. does anyone know any queer events/organisations that i can attend? i’m really looking forward to meeting other queer people on campus and joining any queer study groups or hangouts! Thank you so …	im a trans	gender	Percentage of US population that identifies as transgender	4	[1,2,3]	ChatGPT	Yes	Yes	High	0.0055	0.0114	Yes	https://usafacts.org/articles/what-percentage-of-the-us-population-is-transgender/	Feasible	To estimate the percentage of the US population that identifies as transgender: 1. Surveys and studies, such as those conducted by the Williams Institute and Gallup, indicate that approximately 0.5% to 0.6% of the US population identifies as transgender. 2. A reasonable midpoint estimate is 0.55%. **Confidence Score**: 0.9 (based on consistent data from multiple reliable sources) <answer>0.55</an…	Multiplication	Out
chapmanuniversity	TITLE: Chapman LGBT Scene Hi! im a trans, lesbain girl in my second year at chapman. im looking to meet other queer people on campus but im having trouble finding my way around campus and meeting people. does anyone know any queer events/organisations that i can attend? i’m really looking forward to meeting other queer people on campus and joining any queer study groups or hangouts! Thank you so …	lesbain	sexual_orientation	Percentage of transgender women in the US who are lesbian	5	[1,2]	ChatGPT	Yes	No	Medium	0.2	0.113	Yes	https://bmcpublichealth.biomedcentral.com/articles/10.1186/s12889-023-16654-z	Feasible	To estimate the percentage of transgender women in the US who identify as lesbian: 1. Studies on sexual orientation within the transgender population indicate that a portion of transgender women identify as lesbian, with estimates typically ranging from 15% to 25%. 2. A reasonable midpoint estimate is around 20%. **Confidence Score**: 0.75 (based on limited but relevant survey data) <answer>20</a…	Multiplication	Out
chapmanuniversity	TITLE: Chapman LGBT Scene Hi! im a trans, lesbain girl in my second year at chapman. im looking to meet other queer people on campus but im having trouble finding my way around campus and meeting people. does anyone know any queer events/organisations that i can attend? i’m really looking forward to meeting other queer people on campus and joining any queer study groups or hangouts! Thank you so …	any queer events/organisations	affiliation	Percentage of undergraduate students at Chapman University who are in a club	6	[2,3,4,5]	ChatGPT	Yes	Yes	High	0.7	0.654	Yes	https://www.chapman.edu/campus-services/institutional-research/_files/snapshot/2022-08.pdf	Feasible	**Thought Process**: Chapman University is a private university known for its active campus life and strong emphasis on student involvement. At similar institutions, the percentage of undergraduates participating in clubs or organizations typically ranges between **60% to 80%**. A reasonable estimate for Chapman University is **70%**. **Confidence Score**: 0.8 <answer>70</answer>	Multiplication	Out
chapmanuniversity	TITLE: Chapman LGBT Scene Hi! im a trans, lesbain girl in my second year at chapman. im looking to meet other queer people on campus but im having trouble finding my way around campus and meeting people. does anyone know any queer events/organisations that i can attend? i’m really looking forward to meeting other queer people on campus and joining any queer study groups or hangouts! Thank you so …	any queer events/organisations	affiliation	Percentage of undergraduate students in a club at Chapman University who are involved in a LGBTQIA+ student organization	7	[2,3,4,5]	ChatGPT	Yes	Yes	Medium	0.07	0.0114	Yes	https://www.chapman.edu/admission/undergraduate/dei/lgbtq-applicants.aspx#:~:text=LGBTQIA%2B%20clubs%20and%20activities&text=Some%20of%20the%20LGBTQIA%2B%20student,identifies%20with%20the%20LGBTQIA%2B%20community.	Feasible	**Thought Process**: Chapman University is known for fostering inclusivity and supporting diverse student groups. Typically, the percentage of students involved in LGBTQIA+ organizations is a subset of those active in campus organizations. Based on trends at similar universities, around **5% to 10%** of students in clubs are likely involved in LGBTQIA+ organizations. A reasonable estimate is **7%…	Multiplication	Out
