# Supplementary material
Source: ML conference proceedings conference paper supplement (https://openreview.net/forum?id=HMVQ00vabY)
Supplement: supplementary_material [file 19.xlsx]

## Sheet: Ordering 1
Subreddit	Post	Disclosure (Ordering)	Disclosure Category	Query	ID	Conditionally Independent?	Source Used	Succeeded?	Reliable?	Annotator Confidence	Value	Ground Truth	Ground Truth Reliability	Ground Truth Source	Disclosure Type	ChatGPT Response	Operation	Parentheses
chapmanuniversity	TITLE: Transferring into Chapman for animation and vfx BUT I’m scared of the cost So guys, I got admitted to Chapman as a transfer student from a community college. I really wanted to get into Anim and VFX school for a long time AND I’m super excited to finally get the degree I need to make it in the industry. BUT, boy I j received the tuition bill and im freaking the fuck out I’m a scholarship r…	Chapman	education	number of total students at Chapman university	1	[]	ChatGPT	Yes	Yes	High	10014	10001	Yes	https://www.chapman.edu/about/facts-and-rankings/index.aspx	Feasible	Chapman University has a total enrollment of approximately 10,014 students as of the 2022-2023 academic year. This includes 7,869 undergraduate students and 2,145 graduate students​	Multiplication	Out
chapmanuniversity	TITLE: Transferring into Chapman for animation and vfx BUT I’m scared of the cost So guys, I got admitted to Chapman as a transfer student from a community college. I really wanted to get into Anim and VFX school for a long time AND I’m super excited to finally get the degree I need to make it in the industry. BUT, boy I j received the tuition bill and im freaking the fuck out I’m a scholarship r…	Transferring	education	percentage of students at Chapman university that are transfer students	2	[]	ChatGPT	Yes	Yes	High	0.2	0.19	Yes	https://www.campusreel.org/how-to-transfer-colleges/chapman-university-transfer-requirements#:~:text=At%20Chapman%20University%20(CU)%2C,you%20won't%20be%20alone.	Feasible	At Chapman University, transfer students make up approximately 20% of the undergraduate population. This indicates that transfer students play a significant role in the campus community​	Multiplication	Out
chapmanuniversity	TITLE: Transferring into Chapman for animation and vfx BUT I’m scared of the cost So guys, I got admitted to Chapman as a transfer student from a community college. I really wanted to get into Anim and VFX school for a long time AND I’m super excited to finally get the degree I need to make it in the industry. BUT, boy I j received the tuition bill and im freaking the fuck out I’m a scholarship r…	animation and vfx	education	percentage of Chapman university students that are studying animation and vfx	3	[2]	ChatGPT	Yes	Yes	High	0.025	0.0157	Yes	https://graduation.chapman.edu/wp-content/uploads/sites/2/2024/05/commencement-bulletin-class-of-2024.pdf https://www.chapman.edu/campus-services/institutional-research/_files/fact-sheet/fact-sheet-2223.pdf	Feasible	Chapman University has approximately 10,000 students. Animation and Visual Effects is a specialized program in Dodge College of Film and Media Arts. Dodge College represents around 15% of the university’s student population, and animation is one of several majors offered there. Estimating conservatively, animation and VFX students likely represent about 2-3% of Chapman’s total enrollment. <answer…	Multiplication	Out
chapmanuniversity	TITLE: Transferring into Chapman for animation and vfx BUT I’m scared of the cost So guys, I got admitted to Chapman as a transfer student from a community college. I really wanted to get into Anim and VFX school for a long time AND I’m super excited to finally get the degree I need to make it in the industry. BUT, boy I j received the tuition bill and im freaking the fuck out I’m a scholarship r…	a scholarship	finance	percentage of Chapman university students that receive financial aid	4	[2, 3]	ChatGPT	Yes	Yes	High	0.8	0.8	Yes	https://www.chapman.edu/dodge/apply/undergraduate/tuition-aid-scholarships.aspx	Feasible	Approximately 80% of Chapman University students receive financial aid, which includes federal, state, and institutional support, as well as scholarships and grants	Multiplication	Out
chapmanuniversity	TITLE: Transferring into Chapman for animation and vfx BUT I’m scared of the cost So guys, I got admitted to Chapman as a transfer student from a community college. I really wanted to get into Anim and VFX school for a long time AND I’m super excited to finally get the degree I need to make it in the industry. BUT, boy I j received the tuition bill and im freaking the fuck out I’m a scholarship r…	I'm scared of the cost	emotional_disclosure	percentage of Chapman university students that experience financial distress	5	[2, 3, 4]	ChatGPT	Yes	No	Medium	0.45	0.75	No	https://pmc.ncbi.nlm.nih.gov/articles/PMC8141976/#:~:text=Similarly%2C%20data%20from%20the%20National,in%20the%20past%2012%20months.	Feasible	The percentage of Chapman University students that experience financial distress isn't specifically available. However, based on general student trends in higher education, it is common for a significant portion of college students to face financial stress. National data shows that around 40-50% of students experience financial anxiety during their college years due to tuition, living expenses, a…	Multiplication	Out

## Sheet: Ordering 2
Subreddit	Post	Disclosure (Ordering)	Disclosure Category	Query	ID	Conditionally Independent?	Source Used	Succeeded?	Reliable?	Annotator Confidence	Value	Ground Truth	Ground Truth Reliability	Ground Truth Source	Disclosure Type	ChatGPT Response	Operation	Parentheses
chapmanuniversity	TITLE: Transferring into Chapman for animation and vfx BUT I’m scared of the cost So guys, I got admitted to Chapman as a transfer student from a community college. I really wanted to get into Anim and VFX school for a long time AND I’m super excited to finally get the degree I need to make it in the industry. BUT, boy I j received the tuition bill and im freaking the fuck out I’m a scholarship r…	Chapman	education	number of total students at Chapman university	1	[]	ChatGPT	Yes	Yes	High	10014	10001	Yes	https://www.chapman.edu/about/facts-and-rankings/index.aspx	Feasible	Chapman University has a total enrollment of approximately 10,014 students as of the 2022-2023 academic year. This includes 7,869 undergraduate students and 2,145 graduate students​	Multiplication	Out
chapmanuniversity	TITLE: Transferring into Chapman for animation and vfx BUT I’m scared of the cost So guys, I got admitted to Chapman as a transfer student from a community college. I really wanted to get into Anim and VFX school for a long time AND I’m super excited to finally get the degree I need to make it in the industry. BUT, boy I j received the tuition bill and im freaking the fuck out I’m a scholarship r…	Transferring	education	percentage of students at Chapman university that are transfer students	2	[]	ChatGPT	Yes	Yes	High	0.2	0.19	Yes	https://www.campusreel.org/how-to-transfer-colleges/chapman-university-transfer-requirements#:~:text=At%20Chapman%20University%20(CU)%2C,you%20won't%20be%20alone.	Feasible	At Chapman University, transfer students make up approximately 20% of the undergraduate population. This indicates that transfer students play a significant role in the campus community​	Multiplication	Out
chapmanuniversity	TITLE: Transferring into Chapman for animation and vfx BUT I’m scared of the cost So guys, I got admitted to Chapman as a transfer student from a community college. I really wanted to get into Anim and VFX school for a long time AND I’m super excited to finally get the degree I need to make it in the industry. BUT, boy I j received the tuition bill and im freaking the fuck out I’m a scholarship r…	from a community college	education	percentage of transfer students that come from community colleges	3	[1]	ChatGPT	Yes	No	Low	0.45	0.33	No	https://ccrc.tc.columbia.edu/press-releases/new-reports-all-backgrounds-transfer.html#:~:text=Despite%20surveys%20indicating%20that%20nearly,degree%20within%20six%20years%20of	Important	In the United States, a significant percentage of transfer students come from community colleges. According to the National Student Clearinghouse Research Center, about 45-50% of all transfer students nationwide are from community colleges. This percentage can vary slightly depending on the state, region, and specific university policies, but community colleges serve as a major pipeline for stude…	Multiplication	Out
chapmanuniversity	TITLE: Transferring into Chapman for animation and vfx BUT I’m scared of the cost So guys, I got admitted to Chapman as a transfer student from a community college. I really wanted to get into Anim and VFX school for a long time AND I’m super excited to finally get the degree I need to make it in the industry. BUT, boy I j received the tuition bill and im freaking the fuck out I’m a scholarship r…	animation and vfx	education	percentage of Chapman university students that are studying animation and vfx	4	[2, 3]	ChatGPT	Yes	Yes	High	0.025	0.0157	Yes	https://graduation.chapman.edu/wp-content/uploads/sites/2/2024/05/commencement-bulletin-class-of-2024.pdf https://www.chapman.edu/campus-services/institutional-research/_files/fact-sheet/fact-sheet-2223.pdf	Feasible	Chapman University has approximately 10,000 students. Animation and Visual Effects is a specialized program in Dodge College of Film and Media Arts. Dodge College represents around 15% of the university’s student population, and animation is one of several majors offered there. Estimating conservatively, animation and VFX students likely represent about 2-3% of Chapman’s total enrollment. <answer…	Multiplication	Out
chapmanuniversity	TITLE: Transferring into Chapman for animation and vfx BUT I’m scared of the cost So guys, I got admitted to Chapman as a transfer student from a community college. I really wanted to get into Anim and VFX school for a long time AND I’m super excited to finally get the degree I need to make it in the industry. BUT, boy I j received the tuition bill and im freaking the fuck out I’m a scholarship r…	a scholarship	finance	percentage of Chapman university students that receive financial aid	5	[2, 3, 4]	ChatGPT	Yes	Yes	High	0.8	0.8	Yes	https://www.chapman.edu/dodge/apply/undergraduate/tuition-aid-scholarships.aspx	Feasible	Approximately 80% of Chapman University students receive financial aid, which includes federal, state, and institutional support, as well as scholarships and grants	Multiplication	Out
chapmanuniversity	TITLE: Transferring into Chapman for animation and vfx BUT I’m scared of the cost So guys, I got admitted to Chapman as a transfer student from a community college. I really wanted to get into Anim and VFX school for a long time AND I’m super excited to finally get the degree I need to make it in the industry. BUT, boy I j received the tuition bill and im freaking the fuck out I’m a scholarship r…	I'm scared of the cost	emotional_disclosure	percentage of Chapman university students that experience financial distress	6	[2, 3, 4, 5]	ChatGPT	Yes	No	Medium	0.45	0.75	No	https://pmc.ncbi.nlm.nih.gov/articles/PMC8141976/#:~:text=Similarly%2C%20data%20from%20the%20National,in%20the%20past%2012%20months.	Feasible	The percentage of Chapman University students that experience financial distress isn't specifically available. However, based on general student trends in higher education, it is common for a significant portion of college students to face financial stress. National data shows that around 40-50% of students experience financial anxiety during their college years due to tuition, living expenses, a…	Multiplication	Out
