# Supplementary material
Source: ML conference proceedings conference paper supplement (https://openreview.net/forum?id=HMVQ00vabY)
Supplement: supplementary_material [file 20.xlsx]

## Sheet: Ordering 1
Subreddit	Post	Disclosure (Ordering)	Disclosure Category	Query	ID	Conditionally Independent?	Source Used	Succeeded?	Reliable?	Annotator Confidence	Value	Ground Truth	Ground Truth Reliability	Ground Truth Source	Disclosure Type	ChatGPT Response	Operation	Parentheses
chapmanuniversity	Hey guys! I'm a student + singer/songwriter living in oc, and today I am releasing my first single ever «Lost in OC». https://open.spotify.com/track/7FgK9Xs6UdPZk4Y3tGd7Ln?si=3d872f8afc8c41b9 I wrote this song with indie-folk + pop elements. I am really happy with the way it turned out and I hope you all enjoy it. I’ve been performing at small venues in Santa Ana, like the Observatory and the Con…	student at Chapman	education	number of total students at Chapman university	1	[]	ChatGPT	Yes	Yes	High	10014	10001	Yes	https://www.chapman.edu/about/facts-and-rankings/index.aspx	Feasible	Chapman University has a total enrollment of approximately 10,014 students as of the 2022-2023 academic year. This includes 7,869 undergraduate students and 2,145 graduate students​	Multiplication	Out
chapmanuniversity	Hey guys! I'm a student + singer/songwriter living in oc, and today I am releasing my first single ever «Lost in OC». https://open.spotify.com/track/7FgK9Xs6UdPZk4Y3tGd7Ln?si=3d872f8afc8c41b9 I wrote this song with indie-folk + pop elements. I am really happy with the way it turned out and I hope you all enjoy it. I’ve been performing at small venues in Santa Ana, like the Observatory and the Con…	singer/songwriter	occupation	percentage of people that are singer/songwriters	2	[1]	ChatGPT	Yes	Yes	Medium	0.003	0.0025	No	https://www.billboard.com/pro/music-business-success-takes-time-data/	Important	The percentage of people who are singer-songwriters is quite small compared to the general population. While exact statistics are difficult to determine, based on data from various music industry sources and surveys: According to the Bureau of Labor Statistics (BLS), there are around 70,000 people employed as musicians and singers in the U.S., though this category includes performers who may not …	Multiplication	Out
chapmanuniversity	Hey guys! I'm a student + singer/songwriter living in oc, and today I am releasing my first single ever «Lost in OC». https://open.spotify.com/track/7FgK9Xs6UdPZk4Y3tGd7Ln?si=3d872f8afc8c41b9 I wrote this song with indie-folk + pop elements. I am really happy with the way it turned out and I hope you all enjoy it. I’ve been performing at small venues in Santa Ana, like the Observatory and the Con…	living in oc	location	percentage of chapman university students that live off campus	3	[2]	ChatGPT	Yes	Yes	High	0.55	0.55	Yes	https://www.chapman.edu/about/facts-and-rankings/index.aspx#:~:text=20%20percent%20of%20students%20are,percent%20of%20students%20study%20abroad	Feasible	At Chapman University, a significant portion of students live off-campus, especially upperclassmen. According to information from the Chapman University Housing office and student surveys, approximately 50-60% of Chapman students live off-campus. This is typical for private universities in urban settings, where housing costs can drive students to seek more affordable living options outside the do…	Multiplication	Out
chapmanuniversity	Hey guys! I'm a student + singer/songwriter living in oc, and today I am releasing my first single ever «Lost in OC». https://open.spotify.com/track/7FgK9Xs6UdPZk4Y3tGd7Ln?si=3d872f8afc8c41b9 I wrote this song with indie-folk + pop elements. I am really happy with the way it turned out and I hope you all enjoy it. I’ve been performing at small venues in Santa Ana, like the Observatory and the Con…	indie-folk + pop elements	occupation	percentage of music production that is in the indie-folk or pop genre	4	[1, 2, 3]	ChatGPT	Yes	Yes	Low	0.12	0.2	No	https://www.statista.com/statistics/310746/share-music-album-sales-us-genre/	Important	The percentage of music production in the indie-folk or pop genre can vary significantly depending on the source, but both genres have gained substantial popularity in recent years. The indie-folk genre has seen growth especially on platforms like Bandcamp and SoundCloud, where independent artists thrive. Meanwhile, pop music dominates mainstream charts, streaming platforms, and radio. While prec…	Multiplication	Out
chapmanuniversity	Hey guys! I'm a student + singer/songwriter living in oc, and today I am releasing my first single ever «Lost in OC». https://open.spotify.com/track/7FgK9Xs6UdPZk4Y3tGd7Ln?si=3d872f8afc8c41b9 I wrote this song with indie-folk + pop elements. I am really happy with the way it turned out and I hope you all enjoy it. I’ve been performing at small venues in Santa Ana, like the Observatory and the Con…	I’ve been performing at small venues in Santa Ana, like the Observatory and the Constellation Room.	events	percentage of amateur artists that perform at small venues	5	[1, 3, 4]	ChatGPT	Yes	No	Low	0.65	0.52	No	https://info.xposuremusic.com/article/music-industry-report-2023	Important	Amateur artists often perform at small venues to gain experience, build a local fanbase, and connect with their audience in more intimate settings. Small venues, including cafes, local bars, and small clubs, provide a platform for emerging artists who may not yet have the resources or recognition to perform at larger venues. Based on industry trends, it's estimated that around 60-70% of amateur m…	Multiplication	Out

## Sheet: Ordering 2
Subreddit	Post	Disclosure (Ordering)	Disclosure Category	Query	ID	Conditionally Independent?	Source Used	Succeeded?	Reliable?	Annotator Confidence	Value	Ground Truth	Ground Truth Reliability	Ground Truth Source	Disclosure Type	ChatGPT Response	Operation	Parentheses
chapmanuniversity	Hey guys! I'm a student + singer/songwriter living in oc, and today I am releasing my first single ever «Lost in OC». https://open.spotify.com/track/7FgK9Xs6UdPZk4Y3tGd7Ln?si=3d872f8afc8c41b9 I wrote this song with indie-folk + pop elements. I am really happy with the way it turned out and I hope you all enjoy it. I’ve been performing at small venues in Santa Ana, like the Observatory and the Con…	I’ve been performing at small venues in Santa Ana, like the Observatory and the Constellation Room.	events	number of people that perform at the Observatory in Santa Ana	1	[]	ChatGPT	Yes	Yes	High	500	418	Yes	https://www.observatoryoc.com/	Feasible	The Observatory in Santa Ana is a popular venue for live music performances, with a capacity of about 1,000 people in its main room. In addition to the larger performances, there are often smaller shows at its adjacent rooms, such as the Constellation Room, which hosts more intimate events. Given the regular schedule of shows and the many performances throughout the year, it's reasonable to estim…	multiplication	Out
chapmanuniversity	Hey guys! I'm a student + singer/songwriter living in oc, and today I am releasing my first single ever «Lost in OC». https://open.spotify.com/track/7FgK9Xs6UdPZk4Y3tGd7Ln?si=3d872f8afc8c41b9 I wrote this song with indie-folk + pop elements. I am really happy with the way it turned out and I hope you all enjoy it. I’ve been performing at small venues in Santa Ana, like the Observatory and the Con…	percentage of artists that are college students	education	percentage of music artists that have a college education	2	[1]	ChatGPT	Yes	Yes	High	0.59	0.59	Yes	https://www.careerexplorer.com/careers/musician/education/	Feasible	Around 38% of musicians hold a bachelor's degree, with 21% having a master's degree, and 18% possessing a doctorate​ CAREEREXPLORER ​ COLLEGE FACTUAL . While not all musicians pursue formal education, a significant portion, especially those in certain specialized fields like music performance or music education, choose to earn a degree.	Multiplication	Out
chapmanuniversity	Hey guys! I'm a student + singer/songwriter living in oc, and today I am releasing my first single ever «Lost in OC». https://open.spotify.com/track/7FgK9Xs6UdPZk4Y3tGd7Ln?si=3d872f8afc8c41b9 I wrote this song with indie-folk + pop elements. I am really happy with the way it turned out and I hope you all enjoy it. I’ve been performing at small venues in Santa Ana, like the Observatory and the Con…	living in oc	location	percentage of chapman university students that live off campus	3	[1, 2]	ChatGPT	Yes	Yes	High	0.55	0.55	Yes	https://www.chapman.edu/about/facts-and-rankings/index.aspx#:~:text=20%20percent%20of%20students%20are,percent%20of%20students%20study%20abroad	Feasible	At Chapman University, a significant portion of students live off-campus, especially upperclassmen. According to information from the Chapman University Housing office and student surveys, approximately 50-60% of Chapman students live off-campus. This is typical for private universities in urban settings, where housing costs can drive students to seek more affordable living options outside the do…	Multiplication	Out
chapmanuniversity	Hey guys! I'm a student + singer/songwriter living in oc, and today I am releasing my first single ever «Lost in OC». https://open.spotify.com/track/7FgK9Xs6UdPZk4Y3tGd7Ln?si=3d872f8afc8c41b9 I wrote this song with indie-folk + pop elements. I am really happy with the way it turned out and I hope you all enjoy it. I’ve been performing at small venues in Santa Ana, like the Observatory and the Con…	singer/songwriter	occupation	percentage of artists that make their own songs	4	[1, 2, 3]	ChatGPT	Yes	Yes	Medium	0.55	0.6	No	https://machronicle.com/the-era-of-songwriting-in-pop-music/#:~:text=In%20the%20past%20decade%2C%20mainstream,the%20artist%20as%20a%20songwriter.	Important	A significant portion of artists write their own songs, especially within genres like indie, rock, and pop. The percentage varies widely across genres. In the music industry, it is often estimated that about 50-60% of artists write their own songs. Many pop stars, for example, collaborate with professional songwriters, while in genres like hip-hop and country, a higher percentage of artists tend …	Multiplication	Out
chapmanuniversity	Hey guys! I'm a student + singer/songwriter living in oc, and today I am releasing my first single ever «Lost in OC». https://open.spotify.com/track/7FgK9Xs6UdPZk4Y3tGd7Ln?si=3d872f8afc8c41b9 I wrote this song with indie-folk + pop elements. I am really happy with the way it turned out and I hope you all enjoy it. I’ve been performing at small venues in Santa Ana, like the Observatory and the Con…	indie-folk + pop elements	occupation	percentage of music production that is in the indie-folk genre	5	[1, 2, 3, 4]	ChatGPT	Yes	Yes	Low	0.12	0.14	No	https://www.statista.com/statistics/310746/share-music-album-sales-us-genre/	Important	The percentage of music production in the indie-folk or pop genre can vary significantly depending on the source, but both genres have gained substantial popularity in recent years. The indie-folk genre has seen growth especially on platforms like Bandcamp and SoundCloud, where independent artists thrive. Meanwhile, pop music dominates mainstream charts, streaming platforms, and radio. While prec…	Multiplication	Out
chapmanuniversity	Hey guys! I'm a student + singer/songwriter living in oc, and today I am releasing my first single ever «Lost in OC». https://open.spotify.com/track/7FgK9Xs6UdPZk4Y3tGd7Ln?si=3d872f8afc8c41b9 I wrote this song with indie-folk + pop elements. I am really happy with the way it turned out and I hope you all enjoy it. I’ve been performing at small venues in Santa Ana, like the Observatory and the Con…	finding other artists in the area	occupation	percentage of music artists that collaborate	6	[1, 2, 3, 4, 5]	ChatGPT	Yes	No	Low	0.7	0.4	No	https://medium.com/blokur/the-rise-of-the-feature-why-music-collabs-have-seen-a-30-increase-since-the-90s-9dc9e2739f2#:~:text=Additionally%2C%20in%20Blokur's%202020%20Songwriter's,involved%20a%20feature%20or%20collab.	Important	Collaboration is a common practice in the music industry. Studies suggest that over 70% of music artists engage in collaborations with other musicians, producers, and songwriters. This trend is especially prevalent in popular music genres like pop, hip-hop, and electronic, where artists often work together to create unique sounds or to expand their audience. Collaborating allows artists to tap in…	Multiplication	Out
