# Supplementary material
Source: ML conference proceedings conference paper supplement (https://openreview.net/forum?id=HMVQ00vabY)
Supplement: supplementary_material [file 20.xlsx]

## Sheet: Ordering 1
Subreddit	Post	Disclosure (Ordering)	Disclosure Category	Query	ID	Conditionally Independent?	Source Used	Succeeded?	Reliable?	Annotator Confidence	Value	Ground Truth	Ground Truth Reliability	Ground Truth Source	Disclosure Type	ChatGPT Response	Operation	Parentheses
chapmanuniversity	TITLE: Texas girl with a scholarship at chapman Hey y'all, I'm a transfer student from Texas and recently got into Chapman with a pretty sweet scholarship package. I'm nervous tho cause my parents are super conservative and scared of me moving to LA. They're always telling me LA is the devil's playground and how I'll be corrupted by all the liberals there. I'm afraid they'll shut down all my plan…	I'm a transfer student, chapmanuniversity	education	Number of students that transfer to Chapman University in a single year	1	[]	ChatGPT	Yes	No	Medium	1200	955	Yes	https://www.campusreel.org/how-to-transfer-colleges/chapman-university-transfer-requirements#:~:text=In%202019%2C%20Chapman%20University%20(CU,The%20school%20accepted%20955%20students.	Feasible	To estimate the number of students that transfer to Chapman University in a single year: 1. Chapman University is a medium-sized private university, with a total enrollment of around 10,000 students. 2. Transfer students typically account for a smaller percentage of total enrollment at private universities. For similar institutions, transfer students often comprise around 10-15% of total enrollme…	Multiplication	Out
chapmanuniversity	TITLE: Texas girl with a scholarship at chapman Hey y'all, I'm a transfer student from Texas and recently got into Chapman with a pretty sweet scholarship package. I'm nervous tho cause my parents are super conservative and scared of me moving to LA. They're always telling me LA is the devil's playground and how I'll be corrupted by all the liberals there. I'm afraid they'll shut down all my plan…	girl	gender	Percentage of undergraduate students at Chapman University who are women	2	[1]	ChatGPT	Yes	Yes	High	0.58	0.61	Yes	https://www.collegefactual.com/colleges/chapman-university/student-life/diversity/	Feasible	To estimate the percentage of undergraduate students at Chapman University that are women: 1. Nationally, the percentage of women in undergraduate programs tends to be slightly over 50%, often ranging between 55% and 60%. 2. As a private university with a diverse student body, Chapman University likely follows similar trends. 3. A reasonable estimate for the percentage of undergraduate students a…	Multiplication	Out
chapmanuniversity	TITLE: Texas girl with a scholarship at chapman Hey y'all, I'm a transfer student from Texas and recently got into Chapman with a pretty sweet scholarship package. I'm nervous tho cause my parents are super conservative and scared of me moving to LA. They're always telling me LA is the devil's playground and how I'll be corrupted by all the liberals there. I'm afraid they'll shut down all my plan…	scholarship	finance	Percentage of students at Chapman University that receive financial assistance	3	[1,2]	ChatGPT	Yes	Yes	High	0.8	0.84	Yes	https://catalog.chapman.edu/content.php?catoid=46&navoid=2406#:~:text=to%20this%20policy.-,Financial%20Aid%20Policies,assistance%20are%20encouraged%20to%20apply.	Feasible	To estimate the percentage of students at Chapman University that receive financial assistance: 1. Private universities like Chapman often provide financial aid to a significant proportion of their students due to high tuition costs. 2. Historical data from similar institutions indicates that 70-85% of students typically receive some form of financial assistance. 3. A reasonable estimate for Chap…	Multiplication	Out
chapmanuniversity	TITLE: Texas girl with a scholarship at chapman Hey y'all, I'm a transfer student from Texas and recently got into Chapman with a pretty sweet scholarship package. I'm nervous tho cause my parents are super conservative and scared of me moving to LA. They're always telling me LA is the devil's playground and how I'll be corrupted by all the liberals there. I'm afraid they'll shut down all my plan…	from Texas	location	Percentage of undergraduate students at Chapman University who are out-of-state	4	[1,2,3]	ChatGPT	Yes	No	Low	0.5	0.3137	Yes	https://www.chapman.edu/campus-services/institutional-research/_files/cds/cds_2022-2023.pdf	Feasible	To estimate the percentage of undergraduate students at Chapman University who are out-of-state: 1. Chapman University is a private institution that attracts students from across the United States. 2. Private universities often have a higher percentage of out-of-state students compared to public institutions. For similar universities, this percentage is typically between 40% and 60%. 3. A reasona…	Multiplication	Begin
chapmanuniversity	TITLE: Texas girl with a scholarship at chapman Hey y'all, I'm a transfer student from Texas and recently got into Chapman with a pretty sweet scholarship package. I'm nervous tho cause my parents are super conservative and scared of me moving to LA. They're always telling me LA is the devil's playground and how I'll be corrupted by all the liberals there. I'm afraid they'll shut down all my plan…	from Texas	location	Number of states in the US excluding California	5	[1,2,3]	ChatGPT	Yes	Yes	High	49	49	Yes	https://www.usgs.gov/faqs/what-constitutes-united-states-what-are-official-definitions#:~:text=United%20States%3A%20The%2050%20States%20and%20the%20District%20of%20Columbia.	Feasible	The total number of states in the US is 50. Excluding California, the remaining number of states is: \[ 50 - 1 = 49 \] **Confidence Score**: 1.0 (based on known facts) <answer>49</answer>	(Division, 1)	In
chapmanuniversity	TITLE: Texas girl with a scholarship at chapman Hey y'all, I'm a transfer student from Texas and recently got into Chapman with a pretty sweet scholarship package. I'm nervous tho cause my parents are super conservative and scared of me moving to LA. They're always telling me LA is the devil's playground and how I'll be corrupted by all the liberals there. I'm afraid they'll shut down all my plan…	my parents are super conservative	family	Percentage of Texas population that identifies as conservative	6	[1,2,3,4,5]	ChatGPT	Yes	No	Medium	0.45	0.563	Yes	https://apnews.com/projects/election-results-2024/?office=P	Feasible	**Thought Process**: Texas is known for its conservative-leaning population, though there is diversity in political views across different regions of the state. Surveys and polls suggest that around **40% to 50%** of the Texas population identifies as conservative. A reasonable estimate is **45%**. **Confidence Score**: 0.8 <answer>45</answer>	Multiplication	Out

## Sheet: Ordering 2
Subreddit	Post	Disclosure (Ordering)	Disclosure Category	Query	ID	Conditionally Independent?	Source Used	Succeeded?	Reliable?	Annotator Confidence	Value	Ground Truth	Ground Truth Reliability	Ground Truth Source	Disclosure Type	ChatGPT Response	Operation	Parentheses
chapmanuniversity	TITLE: Texas girl with a scholarship at chapman Hey y'all, I'm a transfer student from Texas and recently got into Chapman with a pretty sweet scholarship package. I'm nervous tho cause my parents are super conservative and scared of me moving to LA. They're always telling me LA is the devil's playground and how I'll be corrupted by all the liberals there. I'm afraid they'll shut down all my plan…	I'm a transfer student, chapmanuniversity	education	Number of applicants to Chapman University in a single year	1	[]	ChatGPT	Yes	Yes	High	15000	14403	Yes	https://news.chapman.edu/2022/08/15/chapman-welcomes-class-of-2026-including-highest-ever-rate-of-first-generation-students/	Feasible	To estimate the number of applicants to Chapman University in a single year: 1. Chapman University is a mid-sized private university and competitive in its admissions. 2. Based on similar private institutions, it likely receives 10,000 to 20,000 applications annually. 3. A reasonable estimate is approximately 15,000 applicants per year. **Confidence Score**: 0.8 (based on trends at comparable uni…	Multiplication	Out
chapmanuniversity	TITLE: Texas girl with a scholarship at chapman Hey y'all, I'm a transfer student from Texas and recently got into Chapman with a pretty sweet scholarship package. I'm nervous tho cause my parents are super conservative and scared of me moving to LA. They're always telling me LA is the devil's playground and how I'll be corrupted by all the liberals there. I'm afraid they'll shut down all my plan…	I'm a transfer student	education	Percentage of applicants to Chapman University in a single year that are prospective transfer students	2	[]	ChatGPT	Yes	Yes	High	0.15	0.1228	Yes	https://www.campusreel.org/how-to-transfer-colleges/chapman-university-transfer-requirements#:~:text=In%202019%2C%20Chapman%20University%20(CU,The%20school%20accepted%20955%20students.	Feasible	To estimate the percentage of applicants to Chapman University in a single year that are prospective transfer students: 1. At most universities, transfer students typically make up about 10-20% of total applicants. 2. Given Chapman University's mid-sized private status, this figure is likely on the higher end of that range, around 15%. **Confidence Score**: 0.75 (based on general trends at simila…	Multiplication	Out
chapmanuniversity	TITLE: Texas girl with a scholarship at chapman Hey y'all, I'm a transfer student from Texas and recently got into Chapman with a pretty sweet scholarship package. I'm nervous tho cause my parents are super conservative and scared of me moving to LA. They're always telling me LA is the devil's playground and how I'll be corrupted by all the liberals there. I'm afraid they'll shut down all my plan…	girl	gender	Percentage of undergraduate students at Chapman University who are women	3	[1,2]	ChatGPT	Yes	Yes	High	0.58	0.61	Yes	https://www.collegefactual.com/colleges/chapman-university/student-life/diversity/	Feasible	To estimate the percentage of undergraduate students at Chapman University that are women: 1. Nationally, the percentage of women in undergraduate programs tends to be slightly over 50%, often ranging between 55% and 60%. 2. As a private university with a diverse student body, Chapman University likely follows similar trends. 3. A reasonable estimate for the percentage of undergraduate students a…	Multiplication	Out
chapmanuniversity	TITLE: Texas girl with a scholarship at chapman Hey y'all, I'm a transfer student from Texas and recently got into Chapman with a pretty sweet scholarship package. I'm nervous tho cause my parents are super conservative and scared of me moving to LA. They're always telling me LA is the devil's playground and how I'll be corrupted by all the liberals there. I'm afraid they'll shut down all my plan…	with a scholarship	finance	Percentage of students at Chapman University that receive financial assistance	4	[1,2,3]	ChatGPT	Yes	Yes	High	0.8	0.84	Yes	https://catalog.chapman.edu/content.php?catoid=46&navoid=2406#:~:text=to%20this%20policy.-,Financial%20Aid%20Policies,assistance%20are%20encouraged%20to%20apply.	Feasible	To estimate the percentage of students at Chapman University that receive financial assistance: 1. Private universities like Chapman often provide financial aid to a significant proportion of their students due to high tuition costs. 2. Historical data from similar institutions indicates that 70-85% of students typically receive some form of financial assistance. 3. A reasonable estimate for Chap…	Multiplication	Out
chapmanuniversity	TITLE: Texas girl with a scholarship at chapman Hey y'all, I'm a transfer student from Texas and recently got into Chapman with a pretty sweet scholarship package. I'm nervous tho cause my parents are super conservative and scared of me moving to LA. They're always telling me LA is the devil's playground and how I'll be corrupted by all the liberals there. I'm afraid they'll shut down all my plan…	from Texas	location	Percentage of undergraduate students at Chapman University who are out-of-state	5	[1,2,3,4]	ChatGPT	Yes	No	Low	0.5	0.3137	Yes	https://www.chapman.edu/campus-services/institutional-research/_files/cds/cds_2022-2023.pdf	Feasible	To estimate the percentage of undergraduate students at Chapman University who are out-of-state: 1. Chapman University is a private institution that attracts students from across the United States. 2. Private universities often have a higher percentage of out-of-state students compared to public institutions. For similar universities, this percentage is typically between 40% and 60%. 3. A reasona…	Multiplication	Begin
chapmanuniversity	TITLE: Texas girl with a scholarship at chapman Hey y'all, I'm a transfer student from Texas and recently got into Chapman with a pretty sweet scholarship package. I'm nervous tho cause my parents are super conservative and scared of me moving to LA. They're always telling me LA is the devil's playground and how I'll be corrupted by all the liberals there. I'm afraid they'll shut down all my plan…	from Texas	location	Number of states in the US excluding California	6	[1,2,3,4]	ChatGPT	Yes	Yes	High	49	49	Yes	https://www.usgs.gov/faqs/what-constitutes-united-states-what-are-official-definitions#:~:text=United%20States%3A%20The%2050%20States%20and%20the%20District%20of%20Columbia.	Feasible	The total number of states in the US is 50. Excluding California, the remaining number of states is: \[ 50 - 1 = 49 \] **Confidence Score**: 1.0 (based on known facts) <answer>49</answer>	(Division, 1)	In
chapmanuniversity	TITLE: Texas girl with a scholarship at chapman Hey y'all, I'm a transfer student from Texas and recently got into Chapman with a pretty sweet scholarship package. I'm nervous tho cause my parents are super conservative and scared of me moving to LA. They're always telling me LA is the devil's playground and how I'll be corrupted by all the liberals there. I'm afraid they'll shut down all my plan…	my parents are super conservative	family	Percentage of Texas population that identifies as conservative	6	[1, 2, 3, 4, 5, 6]	ChatGPT	Yes	No	Medium	0.45	0.563	Yes	https://apnews.com/projects/election-results-2024/?office=P	Feasible	**Thought Process**: Texas is known for its conservative-leaning population, though there is diversity in political views across different regions of the state. Surveys and polls suggest that around **40% to 50%** of the Texas population identifies as conservative. A reasonable estimate is **45%**. **Confidence Score**: 0.8 <answer>45</answer>	Multiplication	Out
