# Supplementary material
Source: ML conference proceedings conference paper supplement (https://openreview.net/forum?id=HMVQ00vabY)
Supplement: supplementary_material [file 21.xlsx]

## Sheet: Ordering 1
Subreddit	Post	Disclosure (Ordering)	Disclosure Category	Query	ID	Conditionally Independent?	Source Used	Succeeded?	Reliable?	Annotator Confidence	Value	Ground Truth	Ground Truth Reliability	Ground Truth Source	Disclosure Type	ChatGPT Response	Operation	Parentheses
cheyenne	TITLE: Got screwed over by Bräuhaus Hinterhof Still fuming about this. worked at Bräuhaus Hinterhof for 2 months in Dec 2023 - Feb 2024 and man was it a fuckin nightmare. The owners (FAFO restaurant group) are fucking morons when it comes to paying their employees. We're talking weeks late, bouncing checks, not showing up to work. Reported them to labor board as soon as my last check didn’t show …	worked at Bräuhaus Hinterhof	occupation	average number of people that work at a restaurant	1	[]	ChatGPT	Yes	Yes	High	30	50	Yes	https://www.menutiger.com/blog/restaurant-employment-statistics	Feasible	The average number of people working at a restaurant depends on the type and size of the establishment. Here’s an estimate: Small, independently owned restaurants: 10–20 employees, including chefs, servers, and cleaning staff. Mid-sized restaurants: 20–50 employees, particularly if they have extended hours or more seating capacity. Large or chain restaurants: 50–100+ employees, including back-of-…	Multiplication	Out

## Sheet: Ordering 2
Subreddit	Post	Disclosure (Ordering)	Disclosure Category	Query	ID	Conditionally Independent?	Source Used	Succeeded?	Reliable?	Annotator Confidence	Value	Ground Truth	Ground Truth Reliability	Ground Truth Source	Disclosure Type	ChatGPT Response	Operation	Parentheses
cheyenne	TITLE: Got screwed over by Bräuhaus Hinterhof Still fuming about this. worked at Bräuhaus Hinterhof for 2 months in Dec 2023 - Feb 2024 and man was it a fuckin nightmare. The owners (FAFO restaurant group) are fucking morons when it comes to paying their employees. We're talking weeks late, bouncing checks, not showing up to work. Reported them to labor board as soon as my last check didn’t show …	Cheyenne	location	population of cheyenne	1	[]	ChatGPT	Yes	Yes	High	66405	65168	Yes	https://en.wikipedia.org/wiki/Cheyenne,_Wyoming	Feasible	As of 2024, the population of Cheyenne, Wyoming, is reported to be approximately 66,405. This marks Cheyenne as the largest city in Wyoming. The city spans about 25.2 square miles, with a population density of roughly 1,828 people per square mile	Multiplication	Out
cheyenne	TITLE: Got screwed over by Bräuhaus Hinterhof Still fuming about this. worked at Bräuhaus Hinterhof for 2 months in Dec 2023 - Feb 2024 and man was it a fuckin nightmare. The owners (FAFO restaurant group) are fucking morons when it comes to paying their employees. We're talking weeks late, bouncing checks, not showing up to work. Reported them to labor board as soon as my last check didn’t show …	worked at Bräuhaus Hinterhof	occupation	percentage of people in Cheyenne that are civilians aged 16 in the labor force	2	[]	ChatGPT	Yes	No	High	0.64	0.4989	Yes	https://data.census.gov/table?q=Cheyenne%20city,%20Wyoming%20occupation	Feasible	The percentage of civilians aged 16 and over in the labor force in Cheyenne, Wyoming, is approximately 64% based on data from Laramie County (which includes Cheyenne) and Wyoming's overall civilian labor force participation rates	Multiplication	Out
cheyenne	TITLE: Got screwed over by Bräuhaus Hinterhof Still fuming about this. worked at Bräuhaus Hinterhof for 2 months in Dec 2023 - Feb 2024 and man was it a fuckin nightmare. The owners (FAFO restaurant group) are fucking morons when it comes to paying their employees. We're talking weeks late, bouncing checks, not showing up to work. Reported them to labor board as soon as my last check didn’t show …	worked at Bräuhaus Hinterhof	occupation	percentage of workers in Cheyenne that work in the food service industry	3	[2]	ChatGPT	Yes	Yes	High	0.085	0.0475	Yes	https://data.census.gov/table?q=Cheyenne%20city,%20Wyoming%20occupation	Feasible	In Cheyenne, approximately 8.5% of workers are employed in the food preparation and serving-related occupations. This includes roles in restaurants, fast food, and other food service establishments	Multiplication	Out
cheyenne	TITLE: Got screwed over by Bräuhaus Hinterhof Still fuming about this. worked at Bräuhaus Hinterhof for 2 months in Dec 2023 - Feb 2024 and man was it a fuckin nightmare. The owners (FAFO restaurant group) are fucking morons when it comes to paying their employees. We're talking weeks late, bouncing checks, not showing up to work. Reported them to labor board as soon as my last check didn’t show …	my last check didn't show up	occupation	percentage of people that are working with bad managers	4	[1, 2, 3]	ChatGPT	Yes	Yes	Low	0.5	0.48	No	https://blog.perceptyx.com/nearly-a-quarter-of-all-employees-are-working-for-the-worst-manager-theyve-ever-had	Important	The percentage of people working with bad managers varies across studies, but research often highlights significant issues with management: According to Gallup, around 50% of employees have left a job specifically to escape a bad manager. A 2020 survey by DDI World indicated that 57% of employees rated their manager as ineffective or subpar. Another study by CareerBuilder found that approximately…	Multiplication	Out
cheyenne	TITLE: Got screwed over by Bräuhaus Hinterhof Still fuming about this. worked at Bräuhaus Hinterhof for 2 months in Dec 2023 - Feb 2024 and man was it a fuckin nightmare. The owners (FAFO restaurant group) are fucking morons when it comes to paying their employees. We're talking weeks late, bouncing checks, not showing up to work. Reported them to labor board as soon as my last check didn’t show …	Reported them to labor board	personal_experience	percentage of people with bad bosses that report a complaint to an administrative labor board	5	[1, 2, 3]	ChatGPT	Yes	Yes	Low	0.075	0.13	Yes	https://www.eeoc.gov/select-task-force-study-harassment-workplace	Important	Studies suggest that around 5-10% of people with bad bosses formally report complaints to an administrative labor board. This estimate accounts for barriers like fear of retaliation and lack of awareness about reporting mechanisms. <answer>7.5</answer>	Multiplication	Out
