# Supplementary material
Source: ML conference proceedings conference paper supplement (https://openreview.net/forum?id=HMVQ00vabY)
Supplement: supplementary_material [file 21.xlsx]

## Sheet: Ordering 1
Subreddit	Post	Disclosure (Ordering)	Disclosure Category	Query	ID	Conditionally Independent?	Source Used	Succeeded?	Reliable?	Annotator Confidence	Value	Ground Truth	Ground Truth Reliability	Ground Truth Source	Disclosure Type	ChatGPT Response	Operation	Parentheses
cheyenne	TITLE: new to Cheyenne I'm (51/M) from Denver looking to get into the dating scene in Cheyenne. I'm into mountaineering, biking, and hiking. looking for someone who can keep up with me on the trails and appreciate the outdoors. I'm also a bit of a beer snob and enjoy trying out local craft brews	Cheyenne	location	Population of Cheyenne, Wyoming	1	[]	ChatGPT	Yes	Yes	High	65000	65168	Yes	https://datacommons.org/place/geoId/5613900?utm_medium=explore&mprop=count&popt=Person&hl=en	Feasible	To estimate the population of Cheyenne, Wyoming: 1. Cheyenne is the capital and largest city of Wyoming. 2. Based on recent census data, Cheyenne's population is approximately 65,000. **Confidence Score**: 0.9 (based on recent census trends) <answer>65000</answer>	Multiplication	Out
cheyenne	TITLE: new to Cheyenne I'm (51/M) from Denver looking to get into the dating scene in Cheyenne. I'm into mountaineering, biking, and hiking. looking for someone who can keep up with me on the trails and appreciate the outdoors. I'm also a bit of a beer snob and enjoy trying out local craft brews	51/M	age_gender	Percentage of people in Cheyenne, Wyoming, that are ages 50-59	2	[]	ChatGPT	Yes	Yes	High	0.14	0.1	Yes	https://censusreporter.org/profiles/16000US5613900-cheyenne-wy/	Feasible	To estimate the percentage of people in Cheyenne, Wyoming, that are ages 50-59: 1. Nationally, the age group 50-59 typically makes up about 12-15% of the population in most cities. 2. Given Cheyenne's demographics, which skew slightly older than the national average, this percentage is likely on the higher end, around 14%. **Confidence Score**: 0.8 (based on demographic trends) <answer>14</answer>	Multiplication	Begin
cheyenne	TITLE: new to Cheyenne I'm (51/M) from Denver looking to get into the dating scene in Cheyenne. I'm into mountaineering, biking, and hiking. looking for someone who can keep up with me on the trails and appreciate the outdoors. I'm also a bit of a beer snob and enjoy trying out local craft brews	51/M	age_gender	Number of years in the age range 50-59	3	[]	ChatGPT	Yes	Yes	High	10	10	Yes		Feasible	The age range 50-59 spans the following years: 50, 51, 52, 53, 54, 55, 56, 57, 58, and 59. This is a total of 10 years. **Confidence Score**: 1.0 (based on basic arithmetic) <answer>10</answer>	(Division, 1)	In
cheyenne	TITLE: new to Cheyenne I'm (51/M) from Denver looking to get into the dating scene in Cheyenne. I'm into mountaineering, biking, and hiking. looking for someone who can keep up with me on the trails and appreciate the outdoors. I'm also a bit of a beer snob and enjoy trying out local craft brews	51/M	age_gender	Percentage of people in Cheyenne, Wyoming, that are male	4	[2,3]	ChatGPT	Yes	Yes	High	0.49	0.52	Yes	https://censusreporter.org/profiles/16000US5613900-cheyenne-wy/	Feasible	To estimate the percentage of people in Cheyenne, Wyoming, that are male: 1. Nationally, the gender distribution is roughly 49% male and 51% female. 2. In Cheyenne, Wyoming, which aligns closely with national trends, the percentage of males is estimated to be around 49%. **Confidence Score**: 0.9 (based on national gender distribution data) <answer>49</answer>	Multiplication	Out
cheyenne	TITLE: new to Cheyenne I'm (51/M) from Denver looking to get into the dating scene in Cheyenne. I'm into mountaineering, biking, and hiking. looking for someone who can keep up with me on the trails and appreciate the outdoors. I'm also a bit of a beer snob and enjoy trying out local craft brews	from Denver	location	Percentage of people in Cheyenne, Wyoming, that moved to the city in the past year	5	[2,3,4]	ChatGPT	Yes	Yes	Medium	0.08	0.043	Yes	https://californiamoversusa.com/resources/living-in-cheyenne-wyoming/#:~:text=facts%20about%20cheyenne&text=Over%202%2C800%20people%20have%20arrived,Washington%2C%20Wisconsin%2C%20and%20Illinois.	Feasible	To estimate the percentage of people in Cheyenne, Wyoming, that moved to the city in the past year: 1. Nationally, about 9-12% of the population relocates each year. In smaller cities like Cheyenne, this rate is often slightly lower, around 7-10%, due to a more stable population. 2. A reasonable estimate for Cheyenne is around 8%. **Confidence Score**: 0.75 (based on national mobility trends and …	Multiplication	Begin
cheyenne	TITLE: new to Cheyenne I'm (51/M) from Denver looking to get into the dating scene in Cheyenne. I'm into mountaineering, biking, and hiking. looking for someone who can keep up with me on the trails and appreciate the outdoors. I'm also a bit of a beer snob and enjoy trying out local craft brews	from Denver	location	Number of states in the US	6	[2, 3, 4]	ChatGPT	Yes	Yes	High	50	50	Yes	https://www.usgs.gov/faqs/what-constitutes-united-states-what-are-official-definitions#:~:text=United%20States%3A%20The%2050%20States%20and%20the%20District%20of%20Columbia.	Feasible	The United States consists of 50 states. **Confidence Score**: 1.0 (based on well-established knowledge) <answer>50</answer>	(Division, 1)	In
cheyenne	TITLE: new to Cheyenne I'm (51/M) from Denver looking to get into the dating scene in Cheyenne. I'm into mountaineering, biking, and hiking. looking for someone who can keep up with me on the trails and appreciate the outdoors. I'm also a bit of a beer snob and enjoy trying out local craft brews	looking to get into the dating scene	relationship_status	Percentage of US population that is single	7	[1,2,3,4,5,6]	ChatGPT	Yes	No	Low	0.55	0.31	Yes	https://www.pewresearch.org/social-trends/2020/08/20/a-profile-of-single-americans/	Feasible	To estimate the percentage of the US population that is single: 1. Surveys such as those conducted by Pew Research Center indicate that approximately 50-60% of adults in the US identify as single (unmarried, including divorced, widowed, or never married). 2. A reasonable midpoint estimate is around 55%. **Confidence Score**: 0.85 (based on consistent survey data) <answer>55</answer>	Multiplication	Out
cheyenne	TITLE: new to Cheyenne I'm (51/M) from Denver looking to get into the dating scene in Cheyenne. I'm into mountaineering, biking, and hiking. looking for someone who can keep up with me on the trails and appreciate the outdoors. I'm also a bit of a beer snob and enjoy trying out local craft brews	I'm into mountaineering, biking, and hiking	interests	Percentage of US population that participates in outdoor recreation activities	8	[1,2,3,4,5,6,7]	ChatGPT	Yes	Yes	High	0.52	0.573	Yes	https://americancanoe.org/wp-content/uploads/2024/07/OIA_2024_Participation_Trends_Exec_Summary.pdf	Feasible	To estimate the percentage of the US population that participates in outdoor recreation activities: 1. Reports from organizations like the Outdoor Industry Association suggest that approximately 50-55% of Americans participate in outdoor recreation activities annually. 2. A reasonable midpoint estimate is around 52%. **Confidence Score**: 0.9 (based on consistent data from national reports) <answ…	Multiplication	Out
cheyenne	TITLE: new to Cheyenne I'm (51/M) from Denver looking to get into the dating scene in Cheyenne. I'm into mountaineering, biking, and hiking. looking for someone who can keep up with me on the trails and appreciate the outdoors. I'm also a bit of a beer snob and enjoy trying out local craft brews	enjoy trying out local craft brews	interests	Percentage of US population that drinks beer	9	[1,2,3,4,5,6,7,8]	ChatGPT	Yes	Yes	High	0.33	0.37	Yes	https://news.gallup.com/poll/509501/six-americans-drink-alcohol.aspx#:~:text=Do%20you%20most%20often%20drink,say%20they%20drink%20alcoholic%20beverages.	Feasible	To estimate the percentage of the US population that drinks beer: 1. Surveys and market research data, such as those from Gallup, indicate that approximately 60-70% of adults in the US consume alcohol. Of these, beer is the most popular alcoholic beverage, with around 40-50% of alcohol drinkers preferring beer. 2. Combining these figures, about 30-35% of the total US population drinks beer. A rea…	Multiplication	Out

## Sheet: Ordering 2
Subreddit	Post	Disclosure (Ordering)	Disclosure Category	Query	ID	Conditionally Independent?	Source Used	Succeeded?	Reliable?	Annotator Confidence	Value	Ground Truth	Ground Truth Reliability	Ground Truth Source	Disclosure Type	ChatGPT Response	Operation	Parentheses
cheyenne	TITLE: new to Cheyenne I'm (51/M) from Denver looking to get into the dating scene in Cheyenne. I'm into mountaineering, biking, and hiking. looking for someone who can keep up with me on the trails and appreciate the outdoors. I'm also a bit of a beer snob and enjoy trying out local craft brews	Cheyenne	location	Number of people that move to Cheyenne, Wyoming, in a single year	1	[]	ChatGPT	Yes	No	Low	5850	2800	Yes	https://californiamoversusa.com/resources/living-in-cheyenne-wyoming/#:~:text=facts%20about%20cheyenne&text=Over%202%2C800%20people%20have%20arrived,Washington%2C%20Wisconsin%2C%20and%20Illinois.	Feasible	To estimate the number of people that move to Cheyenne, Wyoming, in a single year: 1. Cheyenne has a population of approximately 65,000. 2. Based on national averages, about 8-10% of a city’s population typically relocates annually. 3. Using an estimated relocation rate of 9%: \[ 65,000 \times 0.09 = 5,850 \] **Confidence Score**: 0.8 (based on national mobility trends and Cheyenne's population s…	Multiplication	Out
cheyenne	TITLE: new to Cheyenne I'm (51/M) from Denver looking to get into the dating scene in Cheyenne. I'm into mountaineering, biking, and hiking. looking for someone who can keep up with me on the trails and appreciate the outdoors. I'm also a bit of a beer snob and enjoy trying out local craft brews	from Denver	location	Percentage of people from Colorado	2	[]	ChatGPT	Yes	Yes	High	50	50	Yes	https://www.usgs.gov/faqs/what-constitutes-united-states-what-are-official-definitions#:~:text=United%20States%3A%20The%2050%20States%20and%20the%20District%20of%20Columbia.	Feasible	The United States consists of 50 states. **Confidence Score**: 1.0 (based on well-established knowledge) <answer>50</answer>	Multiplication	Out
cheyenne	TITLE: new to Cheyenne I'm (51/M) from Denver looking to get into the dating scene in Cheyenne. I'm into mountaineering, biking, and hiking. looking for someone who can keep up with me on the trails and appreciate the outdoors. I'm also a bit of a beer snob and enjoy trying out local craft brews	51/M	age_gender	Percentage of people in Cheyenne, Wyoming, that are ages 50-59	3	[1,2]	ChatGPT	Yes	Yes	High	0.14	0.1	Yes	https://censusreporter.org/profiles/16000US5613900-cheyenne-wy/	Feasible	To estimate the percentage of people in Cheyenne, Wyoming, that are ages 50-59: 1. Nationally, the age group 50-59 typically makes up about 12-15% of the population in most cities. 2. Given Cheyenne's demographics, which skew slightly older than the national average, this percentage is likely on the higher end, around 14%. **Confidence Score**: 0.8 (based on demographic trends) <answer>14</answer>	Multiplication	Begin
cheyenne	TITLE: new to Cheyenne I'm (51/M) from Denver looking to get into the dating scene in Cheyenne. I'm into mountaineering, biking, and hiking. looking for someone who can keep up with me on the trails and appreciate the outdoors. I'm also a bit of a beer snob and enjoy trying out local craft brews	51/M	age_gender	Number of years in the age range 50-59	4	[1,2]	ChatGPT	Yes	Yes	High	10	10	Yes		Feasible	The age range 50-59 spans the following years: 50, 51, 52, 53, 54, 55, 56, 57, 58, and 59. This is a total of 10 years. **Confidence Score**: 1.0 (based on basic arithmetic) <answer>10</answer>	(Division, 1)	In
cheyenne	TITLE: new to Cheyenne I'm (51/M) from Denver looking to get into the dating scene in Cheyenne. I'm into mountaineering, biking, and hiking. looking for someone who can keep up with me on the trails and appreciate the outdoors. I'm also a bit of a beer snob and enjoy trying out local craft brews	51/M	age_gender	Percentage of people in Cheyenne, Wyoming, that are male	5	[1,2,3,4]	ChatGPT	Yes	Yes	High	0.49	0.52	Yes	https://censusreporter.org/profiles/16000US5613900-cheyenne-wy/	Feasible	To estimate the percentage of people in Cheyenne, Wyoming, that are male: 1. Nationally, the gender distribution is roughly 49% male and 51% female. 2. In Cheyenne, Wyoming, which aligns closely with national trends, the percentage of males is estimated to be around 49%. **Confidence Score**: 0.9 (based on national gender distribution data) <answer>49</answer>	Multiplication	Out
cheyenne	TITLE: new to Cheyenne I'm (51/M) from Denver looking to get into the dating scene in Cheyenne. I'm into mountaineering, biking, and hiking. looking for someone who can keep up with me on the trails and appreciate the outdoors. I'm also a bit of a beer snob and enjoy trying out local craft brews	looking to get into the dating scene	relationship_status	Percentage of US population that is single	6	[1,2,3,4,5]	ChatGPT	Yes	No	Low	0.55	0.31	Yes	https://www.pewresearch.org/social-trends/2020/08/20/a-profile-of-single-americans/	Feasible	To estimate the percentage of the US population that is single: 1. Surveys such as those conducted by Pew Research Center indicate that approximately 50-60% of adults in the US identify as single (unmarried, including divorced, widowed, or never married). 2. A reasonable midpoint estimate is around 55%. **Confidence Score**: 0.85 (based on consistent survey data) <answer>55</answer>	Multiplication	Out
cheyenne	TITLE: new to Cheyenne I'm (51/M) from Denver looking to get into the dating scene in Cheyenne. I'm into mountaineering, biking, and hiking. looking for someone who can keep up with me on the trails and appreciate the outdoors. I'm also a bit of a beer snob and enjoy trying out local craft brews	I'm into mountaineering, biking, and hiking	interests	Percentage of US population that participates in outdoor recreation activities	7	[1,2,3,4,5,6]	ChatGPT	Yes	Yes	High	0.52	0.573	Yes	https://americancanoe.org/wp-content/uploads/2024/07/OIA_2024_Participation_Trends_Exec_Summary.pdf	Feasible	To estimate the percentage of the US population that participates in outdoor recreation activities: 1. Reports from organizations like the Outdoor Industry Association suggest that approximately 50-55% of Americans participate in outdoor recreation activities annually. 2. A reasonable midpoint estimate is around 52%. **Confidence Score**: 0.9 (based on consistent data from national reports) <answ…	Multiplication	Out
cheyenne	TITLE: new to Cheyenne I'm (51/M) from Denver looking to get into the dating scene in Cheyenne. I'm into mountaineering, biking, and hiking. looking for someone who can keep up with me on the trails and appreciate the outdoors. I'm also a bit of a beer snob and enjoy trying out local craft brews	enjoy trying out local craft brews	interests	Percentage of US population that drinks beer	8	[1,2,3,4,5,6,7]	ChatGPT	Yes	Yes	High	0.33	0.37	Yes	https://news.gallup.com/poll/509501/six-americans-drink-alcohol.aspx#:~:text=Do%20you%20most%20often%20drink,say%20they%20drink%20alcoholic%20beverages.	Feasible	To estimate the percentage of the US population that drinks beer: 1. Surveys and market research data, such as those from Gallup, indicate that approximately 60-70% of adults in the US consume alcohol. Of these, beer is the most popular alcoholic beverage, with around 40-50% of alcohol drinkers preferring beer. 2. Combining these figures, about 30-35% of the total US population drinks beer. A rea…	Multiplication	Out
