# Supplementary material
Source: ML conference proceedings conference paper supplement (https://openreview.net/forum?id=HMVQ00vabY)
Supplement: supplementary_material [file 22.xlsx]

## Sheet: Ordering 1
Subreddit	Post	Disclosure (Ordering)	Disclosure Category	Query	ID	Conditionally Independent?	Source Used	Succeeded?	Reliable?	Annotator Confidence	Value	Ground Truth	Ground Truth Reliability	Ground Truth Source	Disclosure Type	ChatGPT Response	Operation	Parentheses
cheyenne	TITLE: Casting Call for Master Chef Auditions in Wyoming My wife, Kelli Q. Jackson, is a casting producer for the Master Chef TV show and is looking for talented cooks in Wyoming to participate in the upcoming auditions. She is specifically looking for people who have a passion for cooking and are willing to put in the time and effort to showcase their skills. If you're a Wyoming resident with a …	Wyoming	location	Population of Wyoming	1	[]	ChatGPT	Yes	Yes	High	580000	584057	Yes	https://datacommons.org/place/geoId/56?utm_medium=explore&mprop=count&popt=Person&hl=en	Feasible	The population of Wyoming is approximately 580,000. **Confidence Score**: 0.95 (based on recent census data) <answer>580000</answer>	Multiplication	Out
cheyenne	TITLE: Casting Call for Master Chef Auditions in Wyoming My wife, Kelli Q. Jackson, is a casting producer for the Master Chef TV show and is looking for talented cooks in Wyoming to participate in the upcoming auditions. She is specifically looking for people who have a passion for cooking and are willing to put in the time and effort to showcase their skills. If you're a Wyoming resident with a …	My wife	relationship_status	Percentage of people in Wyoming who are married	2	[]	ChatGPT	Yes	Yes	High	0.54	0.55	Yes	https://censusreporter.org/profiles/04000US56-wyoming/	Feasible	To estimate the percentage of people in Wyoming who are married: 1. Nationally, about 50-55% of adults are married. 2. Wyoming, being a state with a relatively rural and traditional demographic profile, likely falls near the higher end of this range. 3. A reasonable estimate is around 54%. **Confidence Score**: 0.85 (based on demographic and marriage trends) <answer>54</answer>	Multiplication	Out
cheyenne	TITLE: Casting Call for Master Chef Auditions in Wyoming My wife, Kelli Q. Jackson, is a casting producer for the Master Chef TV show and is looking for talented cooks in Wyoming to participate in the upcoming auditions. She is specifically looking for people who have a passion for cooking and are willing to put in the time and effort to showcase their skills. If you're a Wyoming resident with a …	My wife	relationship_status	Percentage of people in Wyoming who are male	3	[2]	ChatGPT	Yes	Yes	High	0.51	0.51	Yes	https://censusreporter.org/profiles/04000US56-wyoming/	Feasible	To estimate the percentage of people in Wyoming who are male: 1. Nationally, the gender distribution is approximately 49% male and 51% female. 2. Wyoming has a slightly higher percentage of males than the national average due to its rural and industry-driven population. Estimates suggest around 51% of Wyoming's population is male. **Confidence Score**: 0.9 (based on demographic data and trends) <…	Multiplication	Out
cheyenne	TITLE: Casting Call for Master Chef Auditions in Wyoming My wife, Kelli Q. Jackson, is a casting producer for the Master Chef TV show and is looking for talented cooks in Wyoming to participate in the upcoming auditions. She is specifically looking for people who have a passion for cooking and are willing to put in the time and effort to showcase their skills. If you're a Wyoming resident with a …	Kelli Q. Jackson	family	Percentage of US population with the first name Kelli	4	[1,2,3]	ChatGPT	Yes	Yes	High	0.0004	0.0003	Yes	https://www.mynamestats.com/First-Names/K/KE/KELLI/index.html#by-state	Feasible	To estimate the percentage of the US population with the first name Kelli: 1. Kelli is a relatively uncommon name in the US, though it has seen moderate popularity in certain decades. 2. Based on historical name frequency data, it is likely that around 0.03% to 0.05% of the US population has the first name Kelli. A reasonable midpoint estimate is 0.04%. **Confidence Score**: 0.7 (based on name di…	Multiplication	Out
cheyenne	TITLE: Casting Call for Master Chef Auditions in Wyoming My wife, Kelli Q. Jackson, is a casting producer for the Master Chef TV show and is looking for talented cooks in Wyoming to participate in the upcoming auditions. She is specifically looking for people who have a passion for cooking and are willing to put in the time and effort to showcase their skills. If you're a Wyoming resident with a …	Kelli Q. Jackson	family	Percentage of US population with the last name Jackson	5	[1,2,3,4]	ChatGPT	Yes	Yes	High	0.003	0.002	Yes	https://www.mynamestats.com/Last-Names/J/JA/JACKSON/index.html	Feasible	To estimate the percentage of the US population with the last name Jackson: 1. Jackson is a relatively common surname in the United States, consistently ranking among the top 20 most common surnames. 2. Census data suggests that approximately 0.3% of the US population has the last name Jackson. **Confidence Score**: 0.9 (based on census surname frequency data) <answer>0.3</answer>	Multiplication	Out
cheyenne	TITLE: Casting Call for Master Chef Auditions in Wyoming My wife, Kelli Q. Jackson, is a casting producer for the Master Chef TV show and is looking for talented cooks in Wyoming to participate in the upcoming auditions. She is specifically looking for people who have a passion for cooking and are willing to put in the time and effort to showcase their skills. If you're a Wyoming resident with a …	casting producer	family	Percentage of US population that works in the television production industry	6	[1,2,3,4,5]	ChatGPT	Yes	Yes	High	0.0014	0.00023	Yes	https://www.ibisworld.com/industry-statistics/employment/television-production-united-states/#:~:text=There%20are%2076%2C641%20people%20employed,the%20US%20as%20of%202023.	Feasible	To estimate the percentage of the US population that works in the television production industry: 1. The US population is approximately 330 million. 2. Employment in the television production industry is a niche field. The Bureau of Labor Statistics estimates that the broader motion picture and video industries, which include television production, employ around 450,000 people. 3. Dividing this b…	Multiplication	Out

## Sheet: Ordering 2
Subreddit	Post	Disclosure (Ordering)	Disclosure Category	Query	ID	Conditionally Independent?	Source Used	Succeeded?	Reliable?	Annotator Confidence	Value	Ground Truth	Ground Truth Reliability	Ground Truth Source	Disclosure Type	ChatGPT Response	Operation	Parentheses
cheyenne	TITLE: Casting Call for Master Chef Auditions in Wyoming My wife, Kelli Q. Jackson, is a casting producer for the Master Chef TV show and is looking for talented cooks in Wyoming to participate in the upcoming auditions. She is specifically looking for people who have a passion for cooking and are willing to put in the time and effort to showcase their skills. If you're a Wyoming resident with a …	casting producer for the Master Chef TV show, in Cheyenne	occupation	Number of casting directors employed in Wyoming	1	[]	ChatGPT	Yes	No	Low	10	90	Yes	https://www.careerexplorer.com/careers/casting-director/job-market/#:~:text=There%20are%20currently%20an%20estimated%20175300%20casting,to%20grow%20by%206.7%%20between%202022%20and	Feasible	To estimate the number of casting directors employed in Wyoming: 1. Wyoming has a small population (~580,000) and a relatively limited entertainment industry presence compared to larger states. 2. Casting directors are primarily concentrated in states with significant film, television, or theater industries like California or New York. 3. Based on occupational distribution data, Wyoming likely ha…	Multiplication	Out
cheyenne	TITLE: Casting Call for Master Chef Auditions in Wyoming My wife, Kelli Q. Jackson, is a casting producer for the Master Chef TV show and is looking for talented cooks in Wyoming to participate in the upcoming auditions. She is specifically looking for people who have a passion for cooking and are willing to put in the time and effort to showcase their skills. If you're a Wyoming resident with a …	My wife	relationship_status	Percentage of people in Wyoming who are married	2	[1]	ChatGPT	Yes	Yes	High	0.54	0.55	Yes	https://censusreporter.org/profiles/04000US56-wyoming/	Feasible	To estimate the percentage of people in Wyoming who are married: 1. Nationally, about 50-55% of adults are married. 2. Wyoming, being a state with a relatively rural and traditional demographic profile, likely falls near the higher end of this range. 3. A reasonable estimate is around 54%. **Confidence Score**: 0.85 (based on demographic and marriage trends) <answer>54</answer>	Multiplication	Out
cheyenne	TITLE: Casting Call for Master Chef Auditions in Wyoming My wife, Kelli Q. Jackson, is a casting producer for the Master Chef TV show and is looking for talented cooks in Wyoming to participate in the upcoming auditions. She is specifically looking for people who have a passion for cooking and are willing to put in the time and effort to showcase their skills. If you're a Wyoming resident with a …	My wife	relationship_status	Percentage of people in Wyoming who are male	3	[1,2]	ChatGPT	Yes	Yes	High	0.51	0.51	Yes	https://censusreporter.org/profiles/04000US56-wyoming/	Feasible	To estimate the percentage of people in Wyoming who are male: 1. Nationally, the gender distribution is approximately 49% male and 51% female. 2. Wyoming has a slightly higher percentage of males than the national average due to its rural and industry-driven population. Estimates suggest around 51% of Wyoming's population is male. **Confidence Score**: 0.9 (based on demographic data and trends) <…	Multiplication	Out
cheyenne	TITLE: Casting Call for Master Chef Auditions in Wyoming My wife, Kelli Q. Jackson, is a casting producer for the Master Chef TV show and is looking for talented cooks in Wyoming to participate in the upcoming auditions. She is specifically looking for people who have a passion for cooking and are willing to put in the time and effort to showcase their skills. If you're a Wyoming resident with a …	Kelli Q. Jackson	family	Percentage of US population with the first name Kelli	4	[1,2,3]	ChatGPT	Yes	Yes	High	0.0004	0.0003	Yes	https://www.mynamestats.com/First-Names/K/KE/KELLI/index.html#by-state	Feasible	To estimate the percentage of the US population with the first name Kelli: 1. Kelli is a relatively uncommon name in the US, though it has seen moderate popularity in certain decades. 2. Based on historical name frequency data, it is likely that around 0.03% to 0.05% of the US population has the first name Kelli. A reasonable midpoint estimate is 0.04%. **Confidence Score**: 0.7 (based on name di…	Multiplication	Out
cheyenne	TITLE: Casting Call for Master Chef Auditions in Wyoming My wife, Kelli Q. Jackson, is a casting producer for the Master Chef TV show and is looking for talented cooks in Wyoming to participate in the upcoming auditions. She is specifically looking for people who have a passion for cooking and are willing to put in the time and effort to showcase their skills. If you're a Wyoming resident with a …	Kelli Q. Jackson	family	Percentage of US population with the last name Jackson	5	[1,2,3,4]	ChatGPT	Yes	Yes	High	0.003	0.002	Yes	https://www.mynamestats.com/Last-Names/J/JA/JACKSON/index.html	Feasible	To estimate the percentage of the US population with the last name Jackson: 1. Jackson is a relatively common surname in the United States, consistently ranking among the top 20 most common surnames. 2. Census data suggests that approximately 0.3% of the US population has the last name Jackson. **Confidence Score**: 0.9 (based on census surname frequency data) <answer>0.3</answer>	Multiplication	Out

## Sheet: Ordering 3
Subreddit	Post	Disclosure (Ordering)	Disclosure Category	Query	ID	Conditionally Independent?	Source Used	Succeeded?	Reliable?	Annotator Confidence	Value	Ground Truth	Ground Truth Reliability	Ground Truth Source	Disclosure Type	ChatGPT Response	Operation	Parentheses
cheyenne	TITLE: Casting Call for Master Chef Auditions in Wyoming My wife, Kelli Q. Jackson, is a casting producer for the Master Chef TV show and is looking for talented cooks in Wyoming to participate in the upcoming auditions. She is specifically looking for people who have a passion for cooking and are willing to put in the time and effort to showcase their skills. If you're a Wyoming resident with a …	casting producer for the Master Chef TV show	occupation	Number of people that are part of the crew for a major reality TV show	1	[]	ChatGPT	Yes	No	Medium	150	168	Yes	https://stephenfollows.com/p/how-many-people-work-on-a-movie	Feasible	To estimate the number of people that are part of the crew for a major reality TV show: 1. Major reality TV shows typically have a significant crew, including production staff, camera operators, sound technicians, editors, directors, and other support staff. 2. Based on industry reports, crew sizes for major reality TV shows often range between 100 and 200 people. 3. A reasonable estimate is appr…	Multiplication	Out
cheyenne	TITLE: Casting Call for Master Chef Auditions in Wyoming My wife, Kelli Q. Jackson, is a casting producer for the Master Chef TV show and is looking for talented cooks in Wyoming to participate in the upcoming auditions. She is specifically looking for people who have a passion for cooking and are willing to put in the time and effort to showcase their skills. If you're a Wyoming resident with a …	My wife	relationship_status	Percentage of people in Wyoming who are married	2	[1]	ChatGPT	Yes	Yes	High	0.54	0.55	Yes	https://censusreporter.org/profiles/04000US56-wyoming/	Feasible	To estimate the percentage of people in Wyoming who are married: 1. Nationally, about 50-55% of adults are married. 2. Wyoming, being a state with a relatively rural and traditional demographic profile, likely falls near the higher end of this range. 3. A reasonable estimate is around 54%. **Confidence Score**: 0.85 (based on demographic and marriage trends) <answer>54</answer>	Multiplication	Out
cheyenne	TITLE: Casting Call for Master Chef Auditions in Wyoming My wife, Kelli Q. Jackson, is a casting producer for the Master Chef TV show and is looking for talented cooks in Wyoming to participate in the upcoming auditions. She is specifically looking for people who have a passion for cooking and are willing to put in the time and effort to showcase their skills. If you're a Wyoming resident with a …	My wife	relationship_status	Percentage of people in Wyoming who are male	3	[1,2]	ChatGPT	Yes	Yes	High	0.51	0.51	Yes	https://censusreporter.org/profiles/04000US56-wyoming/	Feasible	To estimate the percentage of people in Wyoming who are male: 1. Nationally, the gender distribution is approximately 49% male and 51% female. 2. Wyoming has a slightly higher percentage of males than the national average due to its rural and industry-driven population. Estimates suggest around 51% of Wyoming's population is male. **Confidence Score**: 0.9 (based on demographic data and trends) <…	Multiplication	Out
cheyenne	TITLE: Casting Call for Master Chef Auditions in Wyoming My wife, Kelli Q. Jackson, is a casting producer for the Master Chef TV show and is looking for talented cooks in Wyoming to participate in the upcoming auditions. She is specifically looking for people who have a passion for cooking and are willing to put in the time and effort to showcase their skills. If you're a Wyoming resident with a …	Kelli Q. Jackson	family	Percentage of US population with the first name Kelli	4	[1,2,3]	ChatGPT	Yes	Yes	High	0.0004	0.0003	Yes	https://www.mynamestats.com/First-Names/K/KE/KELLI/index.html#by-state	Feasible	To estimate the percentage of the US population with the first name Kelli: 1. Kelli is a relatively uncommon name in the US, though it has seen moderate popularity in certain decades. 2. Based on historical name frequency data, it is likely that around 0.03% to 0.05% of the US population has the first name Kelli. A reasonable midpoint estimate is 0.04%. **Confidence Score**: 0.7 (based on name di…	Multiplication	Out
cheyenne	TITLE: Casting Call for Master Chef Auditions in Wyoming My wife, Kelli Q. Jackson, is a casting producer for the Master Chef TV show and is looking for talented cooks in Wyoming to participate in the upcoming auditions. She is specifically looking for people who have a passion for cooking and are willing to put in the time and effort to showcase their skills. If you're a Wyoming resident with a …	Kelli Q. Jackson	family	Percentage of US population with the last name Jackson	5	[1,2,3,4]	ChatGPT	Yes	Yes	High	0.003	0.002	Yes	https://www.mynamestats.com/Last-Names/J/JA/JACKSON/index.html	Feasible	To estimate the percentage of the US population with the last name Jackson: 1. Jackson is a relatively common surname in the United States, consistently ranking among the top 20 most common surnames. 2. Census data suggests that approximately 0.3% of the US population has the last name Jackson. **Confidence Score**: 0.9 (based on census surname frequency data) <answer>0.3</answer>	Multiplication	Out
