# Supplementary material
Source: ML conference proceedings conference paper supplement (https://openreview.net/forum?id=HMVQ00vabY)
Supplement: supplementary_material [file 22.xlsx]

## Sheet: Ordering 1
Subreddit	Post	Disclosure (Ordering)	Disclosure Category	Query	ID	Conditionally Independent?	Source Used	Succeeded?	Reliable?	Annotator Confidence	Value	Ground Truth	Ground Truth Reliability	Ground Truth Source	Disclosure Type	ChatGPT Response	Operation	Parentheses
cheyenne	TITLE: Wyoming Smash Tourney this weekend Hey everybody! I'm the owner of the Wyoming Smash facebook page and I'm putting together a tourney for all of Wyoming's smash players. https://www.facebook.com/WyomingSmashMeleeCommunity I want to invite all of you to come out and compete this weekend, the 12th. I've got a lot of prizes lined up for the winners and I'm planning on streaming it live on my …	Wyoming Smash facebook page	hobbies	number of members in the Wyoming Smash facebook page	1	[]	ChatGPT	Yes	Yes	High	400	322	Yes	https://www.facebook.com/groups/wyomingsmash/ https://www.facebook.com/groups/1880453822179215/	Feasible	Estimating the number of members in a niche Facebook page like "Wyoming Smash" involves considering population size, interest in the specific topic (competitive gaming in this case), and general social media activity. Wyoming has a small population (~580,000), and only a subset are likely interested in Smash Bros. Assuming about 0.05%-0.1% of the state's population participates actively in niche …	Multiplication	Out

## Sheet: Ordering 2
Subreddit	Post	Disclosure (Ordering)	Disclosure Category	Query	ID	Conditionally Independent?	Source Used	Succeeded?	Reliable?	Annotator Confidence	Value	Ground Truth	Ground Truth Reliability	Ground Truth Source	Disclosure Type	ChatGPT Response	Operation	Parentheses
cheyenne	TITLE: Wyoming Smash Tourney this weekend Hey everybody! I'm the owner of the Wyoming Smash facebook page and I'm putting together a tourney for all of Wyoming's smash players. https://www.facebook.com/WyomingSmashMeleeCommunity I want to invite all of you to come out and compete this weekend, the 12th. I've got a lot of prizes lined up for the winners and I'm planning on streaming it live on my …	Wyoming Smash Tourney	events	number of people that attend a local Smash tournament	1	[]	ChatGPT	Yes	Yes	High	70	40	Yes	https://www.resetera.com/threads/anyone-here-ever-participated-in-a-local-smash-tournament.148233/	Feasible	The number of people attending a local Smash tournament can vary based on the size of the event, location, and community engagement. Smaller local tournaments in mid-sized cities might attract anywhere from 20 to 100 participants, while larger events in major cities can reach 200 or more. For a typical local tournament, I estimate around 40-100 participants. <answer>70</answer>	Multiplication	Out

## Sheet: Ordering 3
Subreddit	Post	Disclosure (Ordering)	Disclosure Category	Query	ID	Conditionally Independent?	Source Used	Succeeded?	Reliable?	Annotator Confidence	Value	Ground Truth	Ground Truth Reliability	Ground Truth Source	Disclosure Type	ChatGPT Response	Operation	Parentheses
cheyenne	TITLE: Wyoming Smash Tourney this weekend Hey everybody! I'm the owner of the Wyoming Smash facebook page and I'm putting together a tourney for all of Wyoming's smash players. https://www.facebook.com/WyomingSmashMeleeCommunity I want to invite all of you to come out and compete this weekend, the 12th. I've got a lot of prizes lined up for the winners and I'm planning on streaming it live on my …	I'm putting together a tourney for all of Wyoming's smash players.	events	number of tournament organizers for a local super smash bros tournament	1	[]	ChatGPT	Yes	Yes	High	5	5	Yes	https://www.facebook.com/groups/1880453822179215/members/admins	Feasible	For a local Super Smash Bros. tournament, the number of organizers typically depends on the size and scale of the event. A small local event may only require 2-5 people for organizing, handling tasks like setting up, managing brackets, and overseeing logistics. Larger events could have a team of 10 or more organizers. For a typical small-to-medium local tournament, I estimate around 3-7 organizer…	Multiplication	Out
