# Supplementary material
Source: ML conference proceedings conference paper supplement (https://openreview.net/forum?id=HMVQ00vabY)
Supplement: supplementary_material [file 23.xlsx]

## Sheet: Ordering 1
Subreddit	Post	Disclosure (Ordering)	Disclosure Category	Query	ID	Conditionally Independent?	Source Used	Succeeded?	Reliable?	Annotator Confidence	Value	Ground Truth	Ground Truth Reliability	Ground Truth Source	Disclosure Type	ChatGPT Response	Operation	Parentheses
cheyenne	TITLE: BLM Rally I wanna go to the BLM rally this weekend. I was just wondering if anyone knew how to get there? I am camping at Curt Gowdy Park and planning on leaving early so that I don't get stuck in traffic. I've heard the park is a really good place to camp but not sure if its close to the rally. Anyone been to the park and/or planning on going to the rally? what should I expect at the rall…	I am camping at Curt Gowdy Park, cheyenne	location	Number of campsites at Curt Gowdy State Park in Laramie County, Wyoming	1	[]	ChatGPT	Yes	Yes	High	178	178	Yes	https://wyoparks.wyo.gov/index.php/activities-amenities-curt-gowdy/camping-rvs-curt-gowdy	Feasible	Curt Gowdy State Park in Wyoming offers a total of 178 campsites. These sites are available for reservation year-round, with some designated as first-come, first-served during the off-season. The park provides a variety of camping experiences, including tent sites, RV sites with electrical hookups, and group camping areas. <answer>178</answer> Confidence score: 1.0	Multiplication	Out
cheyenne	TITLE: BLM Rally I wanna go to the BLM rally this weekend. I was just wondering if anyone knew how to get there? I am camping at Curt Gowdy Park and planning on leaving early so that I don't get stuck in traffic. I've heard the park is a really good place to camp but not sure if its close to the rally. Anyone been to the park and/or planning on going to the rally? what should I expect at the rall…	I am camping at Curt Gowdy Park, cheyenne	location	Number of people in the average American family	2	[1]	ChatGPT	Yes	Yes	High	3.13	3.15	Yes	https://www.statista.com/statistics/183657/average-size-of-a-family-in-the-us/#:~:text=As%20of%202023%2C%20the%20U.S.,from%203.7%20in%20the%201960s.	Feasible	The average size of an American family has historically been around 3.13 members, based on data from the U.S. Census Bureau. <answer>3.13</answer> Confidence score: 1.0	Multiplication	Out
cheyenne	TITLE: BLM Rally I wanna go to the BLM rally this weekend. I was just wondering if anyone knew how to get there? I am camping at Curt Gowdy Park and planning on leaving early so that I don't get stuck in traffic. I've heard the park is a really good place to camp but not sure if its close to the rally. Anyone been to the park and/or planning on going to the rally? what should I expect at the rall…	this weekend	events	Number of days in a weekend	3	[1,2]	ChatGPT	Yes	Yes	High	2	2	Yes	https://buildremote.co/management/how-many-weekends-in-a-year/	Feasible	A weekend traditionally consists of Saturday and Sunday, totaling two days. <answer>2</answer> Confidence score: 1.0	Multiplication	Out
cheyenne	TITLE: BLM Rally I wanna go to the BLM rally this weekend. I was just wondering if anyone knew how to get there? I am camping at Curt Gowdy Park and planning on leaving early so that I don't get stuck in traffic. I've heard the park is a really good place to camp but not sure if its close to the rally. Anyone been to the park and/or planning on going to the rally? what should I expect at the rall…	I wanna go to the BLM rally	stance	Percentage of US population that has participated in a Black Lives Matter protest	4	[1,2,3]	ChatGPT	Yes	Yes	High	0.15	0.07	Yes	https://www.pewresearch.org/short-reads/2023/07/12/8-facts-about-black-lives-matter/	Feasible	Estimates from surveys and polls, such as those by Pew Research Center, suggest that around 15% of the U.S. population has participated in a Black Lives Matter protest. <answer>15</answer> Confidence score: 0.9	Multiplication	Out

## Sheet: Ordering 2
Subreddit	Post	Disclosure (Ordering)	Disclosure Category	Query	ID	Conditionally Independent?	Source Used	Succeeded?	Reliable?	Annotator Confidence	Value	Ground Truth	Ground Truth Reliability	Ground Truth Source	Disclosure Type	ChatGPT Response	Operation	Parentheses
cheyenne	TITLE: BLM Rally I wanna go to the BLM rally this weekend. I was just wondering if anyone knew how to get there? I am camping at Curt Gowdy Park and planning on leaving early so that I don't get stuck in traffic. I've heard the park is a really good place to camp but not sure if its close to the rally. Anyone been to the park and/or planning on going to the rally? what should I expect at the rall…	cheyenne	location	Population of Cheyenne, Wyoming	1	[]	ChatGPT	Yes	Yes	High	65000	65168	Yes	https://datacommons.org/place/geoId/5613900?utm_medium=explore&mprop=count&popt=Person&hl=en	Feasible	To estimate the population of Cheyenne, Wyoming: 1. Cheyenne is the capital and largest city of Wyoming. 2. Based on recent census data, Cheyenne's population is approximately 65,000. **Confidence Score**: 0.9 (based on recent census trends) <answer>65000</answer>	Multiplication	Out
cheyenne	TITLE: BLM Rally I wanna go to the BLM rally this weekend. I was just wondering if anyone knew how to get there? I am camping at Curt Gowdy Park and planning on leaving early so that I don't get stuck in traffic. I've heard the park is a really good place to camp but not sure if its close to the rally. Anyone been to the park and/or planning on going to the rally? what should I expect at the rall…	I wanna go to the BLM rally	events	Percentage of US population that has participated in a Black Lives Matter protest	2	[1]	ChatGPT	Yes	Yes	High	0.15	0.07	Yes	https://www.pewresearch.org/short-reads/2023/07/12/8-facts-about-black-lives-matter/	Feasible	Estimates from surveys and polls, such as those by Pew Research Center, suggest that around 15% of the U.S. population has participated in a Black Lives Matter protest. <answer>15</answer> Confidence score: 0.9	Multiplication	Out
cheyenne	TITLE: BLM Rally I wanna go to the BLM rally this weekend. I was just wondering if anyone knew how to get there? I am camping at Curt Gowdy Park and planning on leaving early so that I don't get stuck in traffic. I've heard the park is a really good place to camp but not sure if its close to the rally. Anyone been to the park and/or planning on going to the rally? what should I expect at the rall…	I am camping at Curt Gowdy Park	location	Percentage of Wyoming population that camps at Curt Gowdy State Park in Laramie County, Wyoming, during a weekend in a single year	3	[1,2]	ChatGPT	Yes	Yes	High	0.043	0.0998	Yes	https://wyoparks.wyo.gov/index.php/activities-amenities-curt-gowdy/camping-rvs-curt-gowdy	Feasible	To estimate this value: 1. Wyoming's population is approximately 580,000. 2. Curt Gowdy State Park has 178 campsites. 3. Assuming each campsite accommodates an average of 4 people, the park can host about 712 people per weekend. 4. Over 52 weekends in a year, the total capacity is 712 * 52 = 37,024 visitor-days. 5. Assuming some repeat visits, we estimate unique visitors to be about 25,000 in a y…	Multiplication	Begin
