# Supplementary material
Source: ML conference proceedings conference paper supplement (https://openreview.net/forum?id=HMVQ00vabY)
Supplement: supplementary_material [file 23.xlsx]

## Sheet: Ordering 1
Subreddit	Post	Disclosure (Ordering)	Disclosure Category	Query	ID	Conditionally Independent?	Source Used	Succeeded?	Reliable?	Annotator Confidence	Value	Ground Truth	Ground Truth Reliability	Ground Truth Source	Disclosure Type	ChatGPT Response	Operation	Parentheses
cheyenne	TITLE: JessicaPhotography Etsy Shop I'm an amateur photographer with a passion for capturing the beauty of Wyoming. I've recently set up my own Etsy shop, where I sell my photos as prints. Here's a link to my shop: [www.etsy.com/shop/jessicaphotography] I've been living in Cheyenne for a while now, and I've been taking photos of the local landscape and wildlife. I've got a few different collectio…	living in Cheyenne	location	population of Cheyenne	1	[]	ChatGPT	Yes	Yes	High	65132	65168	Yes	https://en.wikipedia.org/wiki/Cheyenne,_Wyoming	Feasible	The population of Cheyenne, Wyoming, is approximately 65,132. <answer>65132</answer>
cheyenne	TITLE: JessicaPhotography Etsy Shop I'm an amateur photographer with a passion for capturing the beauty of Wyoming. I've recently set up my own Etsy shop, where I sell my photos as prints. Here's a link to my shop: [www.etsy.com/shop/jessicaphotography] I've been living in Cheyenne for a while now, and I've been taking photos of the local landscape and wildlife. I've got a few different collectio…	amateur photography	hobbies	percentage of people that do amateur photography	2	[1]	ChatGPT	Yes	Yes	High	0.2	0.19	Yes	https://www.statista.com/forecasts/227424/popularity-of-photography-as-a-hobby-in-the-us	Feasible	Around 20% of people in the United States engage in amateur photography as a hobby, according to surveys and reports on recreational activities. <answer>20</answer>
cheyenne	TITLE: JessicaPhotography Etsy Shop I'm an amateur photographer with a passion for capturing the beauty of Wyoming. I've recently set up my own Etsy shop, where I sell my photos as prints. Here's a link to my shop: [www.etsy.com/shop/jessicaphotography] I've been living in Cheyenne for a while now, and I've been taking photos of the local landscape and wildlife. I've got a few different collectio…	Etsy shop	hobbies	percentage of people that create an etsy shop	3	[1, 2]	ChatGPT	Yes	Yes	Low	0.02	0.0066	No	https://bloggingwizard.com/etsy-statistics/	Feasible	Approximately 2% of people in the United States have created an Etsy shop, based on reports about the platform's user base and small business statistics. <answer>2</answer>
cheyenne	TITLE: JessicaPhotography Etsy Shop I'm an amateur photographer with a passion for capturing the beauty of Wyoming. I've recently set up my own Etsy shop, where I sell my photos as prints. Here's a link to my shop: [www.etsy.com/shop/jessicaphotography] I've been living in Cheyenne for a while now, and I've been taking photos of the local landscape and wildlife. I've got a few different collectio…	Jessica	name	percentage of people that are named Jessica	4	[1, 2, 3]	ChatGPT	Yes	Yes	High	0.006	0.0036	Yes	https://genderize.io/names/jessica	Feasible	The name "Jessica" was very popular in the U.S. in the 1980s and 1990s. As of recent years, it's less common, but still, it’s estimated that about 0.6% of people in the U.S. are named Jessica. <answer>0.6</answer>

## Sheet: Ordering 2
Subreddit	Post	Disclosure (Ordering)	Disclosure Category	Query	ID	Conditionally Independent?	Source Used	Succeeded?	Reliable?	Annotator Confidence	Value	Ground Truth	Ground Truth Reliability	Ground Truth Source	Disclosure Type	ChatGPT Response	Operation	Parentheses
cheyenne	TITLE: JessicaPhotography Etsy Shop I'm an amateur photographer with a passion for capturing the beauty of Wyoming. I've recently set up my own Etsy shop, where I sell my photos as prints. Here's a link to my shop: [www.etsy.com/shop/jessicaphotography] I've been living in Cheyenne for a while now, and I've been taking photos of the local landscape and wildlife. I've got a few different collectio…	living in Cheyenne	location	population of Cheyenne	1	[]	ChatGPT	Yes	Yes	High	65132	65168	Yes	https://en.wikipedia.org/wiki/Cheyenne,_Wyoming	Feasible	The population of Cheyenne, Wyoming, is approximately 65,132. <answer>65132</answer>
cheyenne	TITLE: JessicaPhotography Etsy Shop I'm an amateur photographer with a passion for capturing the beauty of Wyoming. I've recently set up my own Etsy shop, where I sell my photos as prints. Here's a link to my shop: [www.etsy.com/shop/jessicaphotography] I've been living in Cheyenne for a while now, and I've been taking photos of the local landscape and wildlife. I've got a few different collectio…	amateur photography	hobbies	percentage of people that do amateur photography	2	[1]	ChatGPT	Yes	Yes	High	0.2	0.19	Yes	https://www.statista.com/forecasts/227424/popularity-of-photography-as-a-hobby-in-the-us	Feasible	Around 20% of people in the United States engage in amateur photography as a hobby, according to surveys and reports on recreational activities. <answer>20</answer>
cheyenne	TITLE: JessicaPhotography Etsy Shop I'm an amateur photographer with a passion for capturing the beauty of Wyoming. I've recently set up my own Etsy shop, where I sell my photos as prints. Here's a link to my shop: [www.etsy.com/shop/jessicaphotography] I've been living in Cheyenne for a while now, and I've been taking photos of the local landscape and wildlife. I've got a few different collectio…	Jessica	name	percentage of people that are named Jessica	3	[1, 2]	ChatGPT	Yes	Yes	High	0.006	0.0036	Yes	https://genderize.io/names/jessica	Feasible	The name "Jessica" was very popular in the U.S. in the 1980s and 1990s. As of recent years, it's less common, but still, it’s estimated that about 0.6% of people in the U.S. are named Jessica. <answer>0.6</answer>
