# Supplementary material
Source: ML conference proceedings conference paper supplement (https://openreview.net/forum?id=HMVQ00vabY)
Supplement: supplementary_material [file 24.xlsx]

## Sheet: Ordering 1
Subreddit	Post	Disclosure (Ordering)	Disclosure Category	Query	ID	Conditionally Independent?	Source Used	Succeeded?	Reliable?	Annotator Confidence	Value	Ground Truth	Ground Truth Reliability	Ground Truth Source	Disclosure Type	ChatGPT Response	Operation	Parentheses
mentalhealth	TITLE: feeling stuck in life I'm a 28 yo sales rep still trying to get my life back on track after being suicidal 6 months ago. I've been taking antidepressants for the past 6 months, and they've been helping but I still have bad days. I've also been seeing a therapist, but I feel like I'm not making progress. I try to focus on the positive things in my life, like my job and my relationships, but…	28 yo	age	number of 28 year olds in the United States	1	[]	ChatGPT	Yes	Yes	High	4000000	4420680	Yes	https://www.census.gov/popclock/data_tables.php?component=pyramid	Feasible	To estimate the number of 28-year-olds in the United States, we can use data suggesting that there are approximately 4 million people in each single-year age cohort. <answer>4000000</answer>	Multiplication	Out
mentalhealth	TITLE: feeling stuck in life I'm a 28 yo sales rep still trying to get my life back on track after being suicidal 6 months ago. I've been taking antidepressants for the past 6 months, and they've been helping but I still have bad days. I've also been seeing a therapist, but I feel like I'm not making progress. I try to focus on the positive things in my life, like my job and my relationships, but…	sales rep	occupation	percentage of people in the United States that work as sales representatives	2	[1]	ChatGPT	Yes	Yes	High	0.013	0.0082	Yes	https://www.statista.com/statistics/960853/number-employed-sales-people-us-occupation/	Feasible	Approximately 1.3% of people in the United States work as sales representatives, based on labor statistics regarding this profession's prevalence. <answer>1.3</answer>	Multiplication	Out
mentalhealth	TITLE: feeling stuck in life I'm a 28 yo sales rep still trying to get my life back on track after being suicidal 6 months ago. I've been taking antidepressants for the past 6 months, and they've been helping but I still have bad days. I've also been seeing a therapist, but I feel like I'm not making progress. I try to focus on the positive things in my life, like my job and my relationships, but…	being suicidal 6 months ago	mental_health	percentage of people in the United States that have suicidal ideation	3	[1, 2]	ChatGPT	Yes	Yes	High	0.043	0.043	Yes	https://www.cdc.gov/mmwr/volumes/71/ss/ss7101a1.htm#:~:text=The%20prevalence%20of%20suicidal%20thoughts,thoughts%20in%20the%20past%20year.	Feasible	Approximately 4.3% of people in the United States experience suicidal ideation annually, according to mental health surveys and studies. <answer>4.3</answer>	Multiplication	Out
mentalhealth	TITLE: feeling stuck in life I'm a 28 yo sales rep still trying to get my life back on track after being suicidal 6 months ago. I've been taking antidepressants for the past 6 months, and they've been helping but I still have bad days. I've also been seeing a therapist, but I feel like I'm not making progress. I try to focus on the positive things in my life, like my job and my relationships, but…	taking antidepressants	mental_health	percentage of depressed people that are prescribed antidepressants	4	[1, 2]	ChatGPT	Yes	Yes	High	0.6	0.53	Yes	https://www.psychologytoday.com/intl/blog/psychiatry-the-people/201802/30-percent-depressed-people-do-not-receive-treatment#:~:text=What%20about%20MDD%20treatment?,onset%20at%2032%20years%20old.	Feasible	Approximately 60% of people diagnosed with depression are prescribed antidepressants as part of their treatment plan. <answer>60</answer>	Multiplication	Out

## Sheet: Ordering 2
Subreddit	Post	Disclosure (Ordering)	Disclosure Category	Query	ID	Conditionally Independent?	Source Used	Succeeded?	Reliable?	Annotator Confidence	Value	Ground Truth	Ground Truth Reliability	Ground Truth Source	Disclosure Type	ChatGPT Response	Operation	Parentheses
mentalhealth	TITLE: feeling stuck in life I'm a 28 yo sales rep still trying to get my life back on track after being suicidal 6 months ago. I've been taking antidepressants for the past 6 months, and they've been helping but I still have bad days. I've also been seeing a therapist, but I feel like I'm not making progress. I try to focus on the positive things in my life, like my job and my relationships, but…	28 yo	age	number of 28 year olds in the United States	1	[]	ChatGPT	Yes	Yes	High	4000000	4420680	Yes	https://www.census.gov/popclock/data_tables.php?component=pyramid	Feasible	To estimate the number of 28-year-olds in the United States, we can use data suggesting that there are approximately 4 million people in each single-year age cohort. <answer>4000000</answer>	Multiplication	Out
mentalhealth	TITLE: feeling stuck in life I'm a 28 yo sales rep still trying to get my life back on track after being suicidal 6 months ago. I've been taking antidepressants for the past 6 months, and they've been helping but I still have bad days. I've also been seeing a therapist, but I feel like I'm not making progress. I try to focus on the positive things in my life, like my job and my relationships, but…	sales rep	occupation	percentage of people in the United States that work as sales representatives	2	[1]	ChatGPT	Yes	Yes	High	0.013	0.0082	Yes	https://www.statista.com/statistics/960853/number-employed-sales-people-us-occupation/	Feasible	Approximately 1.3% of people in the United States work as sales representatives, based on labor statistics regarding this profession's prevalence. <answer>1.3</answer>	Multiplication	Out
mentalhealth	TITLE: feeling stuck in life I'm a 28 yo sales rep still trying to get my life back on track after being suicidal 6 months ago. I've been taking antidepressants for the past 6 months, and they've been helping but I still have bad days. I've also been seeing a therapist, but I feel like I'm not making progress. I try to focus on the positive things in my life, like my job and my relationships, but…	being suicidal 6 months ago	mental_health	percentage of people in the United States that have suicidal ideation	3	[1, 2]	ChatGPT	Yes	Yes	High	0.043	0.043	Yes	https://www.cdc.gov/mmwr/volumes/71/ss/ss7101a1.htm#:~:text=The%20prevalence%20of%20suicidal%20thoughts,thoughts%20in%20the%20past%20year.	Feasible	Approximately 4.3% of people in the United States experience suicidal ideation annually, according to mental health surveys and studies. <answer>4.3</answer>	Multiplication	Out
mentalhealth	TITLE: feeling stuck in life I'm a 28 yo sales rep still trying to get my life back on track after being suicidal 6 months ago. I've been taking antidepressants for the past 6 months, and they've been helping but I still have bad days. I've also been seeing a therapist, but I feel like I'm not making progress. I try to focus on the positive things in my life, like my job and my relationships, but…	seeing a therapist	mental_health	percentage of suicidal people that see a therapist	4	[1, 2]	ChatGPT	Yes	No	Medium	0.34	0.625	Yes	https://www.psychologytoday.com/intl/blog/psychiatry-the-people/201802/30-percent-depressed-people-do-not-receive-treatment#:~:text=What%20about%20MDD%20treatment?,onset%20at%2032%20years%20old.	Feasible	Approximately 34% of individuals experiencing suicidal ideation seek therapy or counseling, based on mental health research and surveys. <answer>34</answer>	Multiplication	Out
mentalhealth	TITLE: feeling stuck in life I'm a 28 yo sales rep still trying to get my life back on track after being suicidal 6 months ago. I've been taking antidepressants for the past 6 months, and they've been helping but I still have bad days. I've also been seeing a therapist, but I feel like I'm not making progress. I try to focus on the positive things in my life, like my job and my relationships, but…	taking antidepressants	mental_health	percentage of depressed people that are prescribed antidepressants	5	[1, 2, 4]	ChatGPT	Yes	Yes	High	0.6	0.53	Yes	https://www.psychologytoday.com/intl/blog/psychiatry-the-people/201802/30-percent-depressed-people-do-not-receive-treatment#:~:text=What%20about%20MDD%20treatment?,onset%20at%2032%20years%20old.	Feasible	Approximately 60% of people diagnosed with depression are prescribed antidepressants as part of their treatment plan. <answer>60</answer>	Multiplication	Out
