# Supplementary material
Source: ML conference proceedings conference paper supplement (https://openreview.net/forum?id=HMVQ00vabY)
Supplement: supplementary_material [file 24.xlsx]

## Sheet: Ordering 1 
Subreddit	Post	Disclosure (Ordering)	Disclosure Category	Query	ID	Conditionally Independent?	Source Used	Succeeded?	Reliable?	Annotator Confidence	Value	Ground Truth	Ground Truth Reliability	Ground Truth Source	Disclosure Type	ChatGPT Response	Operation	Parentheses
cheyenne	TITLE: traveling through the area I'm a 35M guy moving out of Indiana and I'm driving through Cheyenne to Sunnyvale. Looking for travelers for the road lol. Not a big fan of driving solo, so it'd be nice to have company for the long haul. Also wondering where people go to eat/do stuff in the area. If you're heading out to Sunnyvale, Salt Lake City, Sacramento or Reno and wanna hangout, or know so…	I'm driving through Cheyenne to Sunnyvale	location	Number of people that move to California in a single year	1	[]	ChatGPT	Yes	Yes	High	500000	475803	Yes	https://www.forbes.com/home-improvement/moving-services/california-moving-statistics/#:~:text=In%202022%2C%20California%20gained%20475%2C803,according%20to%20the%20U.S.%20Census.	Feasible	To estimate this value: 1. Historical data shows that California typically sees a net migration of approximately 100,000 to 150,000 people annually. 2. Total gross migration (including those moving in and out) is much higher, with estimates around 500,000 to 600,000 moving into California annually. Using this as a reference, the estimated number of people moving to California in a single year is …	Multiplication	Out
cheyenne	TITLE: traveling through the area I'm a 35M guy moving out of Indiana and I'm driving through Cheyenne to Sunnyvale. Looking for travelers for the road lol. Not a big fan of driving solo, so it'd be nice to have company for the long haul. Also wondering where people go to eat/do stuff in the area. If you're heading out to Sunnyvale, Salt Lake City, Sacramento or Reno and wanna hangout, or know so…	I'm driving through Cheyenne to Sunnyvale	location	Percentage of people in California that live in Sunnyvale, CA	2	[1]	ChatGPT	Yes	Yes	High	0.00397	0.0039	Yes	https://datacommons.org/place/geoId/0677000?utm_medium=explore&mprop=count&popt=Person&hl=en	Feasible	To estimate: 1. California's population is approximately 39 million. 2. Sunnyvale's population is around 155,000. 3. The percentage is calculated as \( \frac{155,000}{39,000,000} \times 100 = 0.397\% \). <answer>0.397</answer> Confidence score: 0.95	Multiplication	Begin
cheyenne	TITLE: traveling through the area I'm a 35M guy moving out of Indiana and I'm driving through Cheyenne to Sunnyvale. Looking for travelers for the road lol. Not a big fan of driving solo, so it'd be nice to have company for the long haul. Also wondering where people go to eat/do stuff in the area. If you're heading out to Sunnyvale, Salt Lake City, Sacramento or Reno and wanna hangout, or know so…	moving out of Indiana	location	Number of states in the US	3	[1]	ChatGPT	Yes	Yes	High	50	50	Yes	https://www.usgs.gov/faqs/what-constitutes-united-states-what-are-official-definitions#:~:text=United%20States%3A%20The%2050%20States%20and%20the%20District%20of%20Columbia.	Feasible	The United States consists of 50 states. <answer>50</answer> Confidence score: 1.0	(Division, 1)	In
cheyenne	TITLE: traveling through the area I'm a 35M guy moving out of Indiana and I'm driving through Cheyenne to Sunnyvale. Looking for travelers for the road lol. Not a big fan of driving solo, so it'd be nice to have company for the long haul. Also wondering where people go to eat/do stuff in the area. If you're heading out to Sunnyvale, Salt Lake City, Sacramento or Reno and wanna hangout, or know so…	35M	age_gender	Percentage of people in Sunnyvale, CA, who are ages 30-39	4	[1,3]	ChatGPT	Yes	Yes	High	0.22	0.2	Yes	https://censusreporter.org/profiles/16000US0677000-sunnyvale-ca/	Feasible	To estimate: 1. Based on demographic data, approximately 20-25% of Sunnyvale's population is typically in the 30-39 age range. 2. Using a midpoint estimate, the percentage is around 22%. <answer>22</answer> Confidence score: 0.9	Multiplication	Begin
cheyenne	TITLE: traveling through the area I'm a 35M guy moving out of Indiana and I'm driving through Cheyenne to Sunnyvale. Looking for travelers for the road lol. Not a big fan of driving solo, so it'd be nice to have company for the long haul. Also wondering where people go to eat/do stuff in the area. If you're heading out to Sunnyvale, Salt Lake City, Sacramento or Reno and wanna hangout, or know so…	35M	age_gender	Number of years in the age range 30-39	5	[1,3]	ChatGPT	Yes	Yes	High	10	10	Yes		Feasible	The age range 30-39 spans 10 years. <answer>10</answer> Confidence score: 1.0	(Division, 1)	In
cheyenne	TITLE: traveling through the area I'm a 35M guy moving out of Indiana and I'm driving through Cheyenne to Sunnyvale. Looking for travelers for the road lol. Not a big fan of driving solo, so it'd be nice to have company for the long haul. Also wondering where people go to eat/do stuff in the area. If you're heading out to Sunnyvale, Salt Lake City, Sacramento or Reno and wanna hangout, or know so…	35M	age_gender	Percentage of people in Sunnyvale, CA, who are male	6	[1,3,4,5]	ChatGPT	Yes	Yes	High	0.51	0.53	Yes	https://censusreporter.org/profiles/16000US0677000-sunnyvale-ca/	Feasible	To estimate: 1. Based on demographic data for Sunnyvale, CA, the male population typically makes up around 51% of the total population. 2. This aligns with general trends in urban areas with tech industry hubs. <answer>51</answer> Confidence score: 0.95	Multiplication	Out
cheyenne	TITLE: traveling through the area I'm a 35M guy moving out of Indiana and I'm driving through Cheyenne to Sunnyvale. Looking for travelers for the road lol. Not a big fan of driving solo, so it'd be nice to have company for the long haul. Also wondering where people go to eat/do stuff in the area. If you're heading out to Sunnyvale, Salt Lake City, Sacramento or Reno and wanna hangout, or know so…	I'm driving through Cheyenne to Sunnyvale	location	Percentage of US population that has been on a road trip	7	[1,2,3,4,5,6]	ChatGPT	Yes	No	Medium	0.65	0.75	Yes	https://www.foxweather.com/lifestyle/travelers-plan-to-drive-this-summer-survey	Feasible	To estimate: 1. Surveys and studies indicate that road trips are a popular activity in the U.S., with estimates suggesting that around 60-70% of the population has participated in at least one road trip during their lifetime. 2. Using a midpoint estimate, the percentage is approximately 65%. <answer>65</answer> Confidence score: 0.85	Multiplication	Out

## Sheet: Ordering 2
Subreddit	Post	Disclosure (Ordering)	Disclosure Category	Query	ID	Conditionally Independent?	Source Used	Succeeded?	Reliable?	Annotator Confidence	Value	Ground Truth	Ground Truth Reliability	Ground Truth Source	Disclosure Type	ChatGPT Response	Operation	Parentheses
cheyenne	TITLE: traveling through the area I'm a 35M guy moving out of Indiana and I'm driving through Cheyenne to Sunnyvale. Looking for travelers for the road lol. Not a big fan of driving solo, so it'd be nice to have company for the long haul. Also wondering where people go to eat/do stuff in the area. If you're heading out to Sunnyvale, Salt Lake City, Sacramento or Reno and wanna hangout, or know so…	moving out of Indiana	location	Number of people that move out of Indiana in a single year	1	[]	ChatGPT	Yes	No	Medium	119000	137624	Yes	https://fox59.com/indiana-news/more-than-137k-people-left-indiana-last-year-where-did-they-move-to/	Feasible	To estimate: 1. Historical migration data indicates that approximately 1.5% to 2% of a state's population moves out annually. 2. Indiana's population is about 6.8 million. 3. Using the midpoint of 1.75%, the estimated number of people moving out of Indiana annually is \( 6,800,000 \times 0.0175 = 119,000 \). <answer>119000</answer> Confidence score: 0.85	Multiplication	Begin
cheyenne	TITLE: traveling through the area I'm a 35M guy moving out of Indiana and I'm driving through Cheyenne to Sunnyvale. Looking for travelers for the road lol. Not a big fan of driving solo, so it'd be nice to have company for the long haul. Also wondering where people go to eat/do stuff in the area. If you're heading out to Sunnyvale, Salt Lake City, Sacramento or Reno and wanna hangout, or know so…	I'm driving through Cheyenne to Sunnyvale	location	Number of states in the US	2	[]	ChatGPT	Yes	Yes	High	50	50	Yes	https://www.usgs.gov/faqs/what-constitutes-united-states-what-are-official-definitions#:~:text=United%20States%3A%20The%2050%20States%20and%20the%20District%20of%20Columbia.	Feasible	The United States consists of 50 states. <answer>50</answer> Confidence score: 1.0	(Division, 1)	In
cheyenne	TITLE: traveling through the area I'm a 35M guy moving out of Indiana and I'm driving through Cheyenne to Sunnyvale. Looking for travelers for the road lol. Not a big fan of driving solo, so it'd be nice to have company for the long haul. Also wondering where people go to eat/do stuff in the area. If you're heading out to Sunnyvale, Salt Lake City, Sacramento or Reno and wanna hangout, or know so…	I'm driving through Cheyenne to Sunnyvale	location	Percentage of people in California that live in Sunnyvale, CA	3	[1,2]	ChatGPT	Yes	Yes	High	0.00397	0.0039	Yes	https://datacommons.org/place/geoId/0677000?utm_medium=explore&mprop=count&popt=Person&hl=en	Feasible	To estimate: 1. California's population is approximately 39 million. 2. Sunnyvale's population is around 155,000. 3. The percentage is calculated as \( \frac{155,000}{39,000,000} \times 100 = 0.397\% \). <answer>0.397</answer> Confidence score: 0.95	Multiplication	Out
cheyenne	TITLE: traveling through the area I'm a 35M guy moving out of Indiana and I'm driving through Cheyenne to Sunnyvale. Looking for travelers for the road lol. Not a big fan of driving solo, so it'd be nice to have company for the long haul. Also wondering where people go to eat/do stuff in the area. If you're heading out to Sunnyvale, Salt Lake City, Sacramento or Reno and wanna hangout, or know so…	35M	age_gender	Percentage of people in Sunnyvale, CA, who are ages 30-39	4	[1,2]	ChatGPT	Yes	Yes	High	0.22	0.2	Yes	https://censusreporter.org/profiles/16000US0677000-sunnyvale-ca/	Feasible	To estimate: 1. Based on demographic data, approximately 20-25% of Sunnyvale's population is typically in the 30-39 age range. 2. Using a midpoint estimate, the percentage is around 22%. <answer>22</answer> Confidence score: 0.9	Multiplication	Begin
cheyenne	TITLE: traveling through the area I'm a 35M guy moving out of Indiana and I'm driving through Cheyenne to Sunnyvale. Looking for travelers for the road lol. Not a big fan of driving solo, so it'd be nice to have company for the long haul. Also wondering where people go to eat/do stuff in the area. If you're heading out to Sunnyvale, Salt Lake City, Sacramento or Reno and wanna hangout, or know so…	35M	age_gender	Number of years in the age range 30-39	5	[1,2]	ChatGPT	Yes	Yes	High	10	10	Yes		Feasible	The age range 30-39 spans 10 years. <answer>10</answer> Confidence score: 1.0	(Division, 1)	In
cheyenne	TITLE: traveling through the area I'm a 35M guy moving out of Indiana and I'm driving through Cheyenne to Sunnyvale. Looking for travelers for the road lol. Not a big fan of driving solo, so it'd be nice to have company for the long haul. Also wondering where people go to eat/do stuff in the area. If you're heading out to Sunnyvale, Salt Lake City, Sacramento or Reno and wanna hangout, or know so…	35M	age_gender	Percentage of people in Sunnyvale, CA, who are male	6	[1,2,4,5]	ChatGPT	Yes	Yes	High	0.51	0.53	Yes	https://censusreporter.org/profiles/16000US0677000-sunnyvale-ca/	Feasible	To estimate: 1. Based on demographic data for Sunnyvale, CA, the male population typically makes up around 51% of the total population. 2. This aligns with general trends in urban areas with tech industry hubs. <answer>51</answer> Confidence score: 0.95	Multiplication	Out
cheyenne	TITLE: traveling through the area I'm a 35M guy moving out of Indiana and I'm driving through Cheyenne to Sunnyvale. Looking for travelers for the road lol. Not a big fan of driving solo, so it'd be nice to have company for the long haul. Also wondering where people go to eat/do stuff in the area. If you're heading out to Sunnyvale, Salt Lake City, Sacramento or Reno and wanna hangout, or know so…	I'm driving through Cheyenne to Sunnyvale	location	Percentage of US population that has been on a road trip	7	[1,2,3,4,5,6]	ChatGPT	Yes	No	Medium	0.65	0.75	Yes	https://www.foxweather.com/lifestyle/travelers-plan-to-drive-this-summer-survey	Feasible	To estimate: 1. Surveys and studies indicate that road trips are a popular activity in the U.S., with estimates suggesting that around 60-70% of the population has participated in at least one road trip during their lifetime. 2. Using a midpoint estimate, the percentage is approximately 65%. <answer>65</answer> Confidence score: 0.85	Multiplication	Out

## Sheet: Ordering 3
Subreddit	Post	Disclosure (Ordering)	Disclosure Category	Query	ID	Conditionally Independent?	Source Used	Succeeded?	Reliable?	Annotator Confidence	Value	Ground Truth	Ground Truth Reliability	Ground Truth Source	Disclosure Type	ChatGPT Response	Operation	Parentheses
cheyenne	TITLE: traveling through the area I'm a 35M guy moving out of Indiana and I'm driving through Cheyenne to Sunnyvale. Looking for travelers for the road lol. Not a big fan of driving solo, so it'd be nice to have company for the long haul. Also wondering where people go to eat/do stuff in the area. If you're heading out to Sunnyvale, Salt Lake City, Sacramento or Reno and wanna hangout, or know so…	moving out of Indiana	location	Number of people that move out of Indiana in a single year	1	[]	ChatGPT	Yes	No	Medium	119000	137624	Yes	https://fox59.com/indiana-news/more-than-137k-people-left-indiana-last-year-where-did-they-move-to/	Feasible	To estimate: 1. Historical migration data indicates that approximately 1.5% to 2% of a state's population moves out annually. 2. Indiana's population is about 6.8 million. 3. Using the midpoint of 1.75%, the estimated number of people moving out of Indiana annually is \( 6,800,000 \times 0.0175 = 119,000 \). <answer>119000</answer> Confidence score: 0.85	Multiplication	Begin
cheyenne	TITLE: traveling through the area I'm a 35M guy moving out of Indiana and I'm driving through Cheyenne to Sunnyvale. Looking for travelers for the road lol. Not a big fan of driving solo, so it'd be nice to have company for the long haul. Also wondering where people go to eat/do stuff in the area. If you're heading out to Sunnyvale, Salt Lake City, Sacramento or Reno and wanna hangout, or know so…	in a few days	time	Number of weekends in a year	2	[]	ChatGPT	Yes	Yes	High	52	52	Yes	https://www.sawaal.com/calendar-questions-and-answers/how-many-weekends-in-a-year_13475#:~:text=Weekend%20means%20Saturday%20%26%20Sunday%20together,52%20weekends%20in%20a%20year.	Feasible	**Thought Process**: A year typically has 52 weeks. Each week includes a weekend (Saturday and Sunday). Therefore, there are 52 weekends in a standard year. **Confidence Score**: 1.0 <answer>52</answer>	(Division, 1)	In
cheyenne	TITLE: traveling through the area I'm a 35M guy moving out of Indiana and I'm driving through Cheyenne to Sunnyvale. Looking for travelers for the road lol. Not a big fan of driving solo, so it'd be nice to have company for the long haul. Also wondering where people go to eat/do stuff in the area. If you're heading out to Sunnyvale, Salt Lake City, Sacramento or Reno and wanna hangout, or know so…	I'm driving through Cheyenne to Sunnyvale	location	Number of states in the US	3	[]	ChatGPT	Yes	Yes	High	50	50	Yes	https://www.usgs.gov/faqs/what-constitutes-united-states-what-are-official-definitions#:~:text=United%20States%3A%20The%2050%20States%20and%20the%20District%20of%20Columbia.	Feasible	The United States consists of 50 states. <answer>50</answer> Confidence score: 1.0	(Division, 1)	In
cheyenne	TITLE: traveling through the area I'm a 35M guy moving out of Indiana and I'm driving through Cheyenne to Sunnyvale. Looking for travelers for the road lol. Not a big fan of driving solo, so it'd be nice to have company for the long haul. Also wondering where people go to eat/do stuff in the area. If you're heading out to Sunnyvale, Salt Lake City, Sacramento or Reno and wanna hangout, or know so…	I'm driving through Cheyenne to Sunnyvale	location	Percentage of people in California that live in Sunnyvale, CA	4	[1,2,3]	ChatGPT	Yes	Yes	High	0.00397	0.0039	Yes	https://datacommons.org/place/geoId/0677000?utm_medium=explore&mprop=count&popt=Person&hl=en	Feasible	To estimate: 1. California's population is approximately 39 million. 2. Sunnyvale's population is around 155,000. 3. The percentage is calculated as \( \frac{155,000}{39,000,000} \times 100 = 0.397\% \). <answer>0.397</answer> Confidence score: 0.95	Multiplication	Out
cheyenne	TITLE: traveling through the area I'm a 35M guy moving out of Indiana and I'm driving through Cheyenne to Sunnyvale. Looking for travelers for the road lol. Not a big fan of driving solo, so it'd be nice to have company for the long haul. Also wondering where people go to eat/do stuff in the area. If you're heading out to Sunnyvale, Salt Lake City, Sacramento or Reno and wanna hangout, or know so…	35M	age_gender	Percentage of people in Sunnyvale, CA, who are ages 30-39	5	[1,2,3]	ChatGPT	Yes	Yes	High	0.22	0.2	Yes	https://censusreporter.org/profiles/16000US0677000-sunnyvale-ca/	Feasible	To estimate: 1. Based on demographic data, approximately 20-25% of Sunnyvale's population is typically in the 30-39 age range. 2. Using a midpoint estimate, the percentage is around 22%. <answer>22</answer> Confidence score: 0.9	Multiplication	Begin
cheyenne	TITLE: traveling through the area I'm a 35M guy moving out of Indiana and I'm driving through Cheyenne to Sunnyvale. Looking for travelers for the road lol. Not a big fan of driving solo, so it'd be nice to have company for the long haul. Also wondering where people go to eat/do stuff in the area. If you're heading out to Sunnyvale, Salt Lake City, Sacramento or Reno and wanna hangout, or know so…	35M	age_gender	Number of years in the age range 30-39	6	[1,2,3]	ChatGPT	Yes	Yes	High	10	10	Yes		Feasible	The age range 30-39 spans 10 years. <answer>10</answer> Confidence score: 1.0	(Division, 1)	In
cheyenne	TITLE: traveling through the area I'm a 35M guy moving out of Indiana and I'm driving through Cheyenne to Sunnyvale. Looking for travelers for the road lol. Not a big fan of driving solo, so it'd be nice to have company for the long haul. Also wondering where people go to eat/do stuff in the area. If you're heading out to Sunnyvale, Salt Lake City, Sacramento or Reno and wanna hangout, or know so…	35M	age_gender	Percentage of people in Sunnyvale, CA, who are male	7	[1,2,3,5,6]	ChatGPT	Yes	Yes	High	0.51	0.53	Yes	https://censusreporter.org/profiles/16000US0677000-sunnyvale-ca/	Feasible	To estimate: 1. Based on demographic data for Sunnyvale, CA, the male population typically makes up around 51% of the total population. 2. This aligns with general trends in urban areas with tech industry hubs. <answer>51</answer> Confidence score: 0.95	Multiplication	Out
cheyenne	TITLE: traveling through the area I'm a 35M guy moving out of Indiana and I'm driving through Cheyenne to Sunnyvale. Looking for travelers for the road lol. Not a big fan of driving solo, so it'd be nice to have company for the long haul. Also wondering where people go to eat/do stuff in the area. If you're heading out to Sunnyvale, Salt Lake City, Sacramento or Reno and wanna hangout, or know so…	I'm driving through Cheyenne to Sunnyvale	location	Percentage of US population that has been on a road trip	8	[1,2,3,4,5,6,7]	ChatGPT	Yes	No	Medium	0.65	0.75	Yes	https://www.foxweather.com/lifestyle/travelers-plan-to-drive-this-summer-survey	Feasible	To estimate: 1. Surveys and studies indicate that road trips are a popular activity in the U.S., with estimates suggesting that around 60-70% of the population has participated in at least one road trip during their lifetime. 2. Using a midpoint estimate, the percentage is approximately 65%. <answer>65</answer> Confidence score: 0.85	Multiplication	Out
