# Supplementary material
Source: ML conference proceedings conference paper supplement (https://openreview.net/forum?id=HMVQ00vabY)
Supplement: supplementary_material [file 25.xlsx]

## Sheet: Ordering 1
Subreddit	Post	Disclosure (Ordering)	Disclosure Category	Query	ID	Conditionally Independent?	Source Used	Succeeded?	Reliable?	Annotator Confidence	Value	Ground Truth	Ground Truth Reliability	Ground Truth Source	Disclosure Type	ChatGPT Response	Operation	Parentheses
chapmanuniversity	TITLE: Tattoo artist Hey guys! I'm a tattoo artist living in the OC area. I specialize in gothic lettering and can do custom prints! If you're interested in getting a tattoo, I'd love to set up a consultation to discuss your ideas. Don't worry if you're a total newbie or have any questions, hit me up if you're interested!	living in the OC area	location	number of people living in the orange county area	1	[]	ChatGPT	Yes	Yes	High	3160000	3186989	Yes	https://en.wikipedia.org/wiki/Orange_County,_California	Feasible	Orange County, California, has an estimated population of approximately 3,160,000 people as of recent census data. <answer>3160000</answer>	Multiplication	Out
chapmanuniversity	TITLE: Tattoo artist Hey guys! I'm a tattoo artist living in the OC area. I specialize in gothic lettering and can do custom prints! If you're interested in getting a tattoo, I'd love to set up a consultation to discuss your ideas. Don't worry if you're a total newbie or have any questions, hit me up if you're interested!	tattoo artist	occupation	percentage of people in the US that are tattoo artists	2	[1]	ChatGPT	Yes	Yes	High	0.0001	0.00015	Yes	https://blog.marketresearch.com/tattoo-parlors-tattoo-removal-is-now-a-booming-4.5-billion-industry#:~:text=There%20are%20roughly%2052%2C000%20tattoo,set%20up%20shop%20at%20home.	Feasible	Tattoo artists make up a very small percentage of the U.S. population. Based on the number of tattoo artists (estimated at around 30,000–40,000) compared to the total U.S. population (approximately 331 million), the percentage is roughly 0.01%. <answer>0.01</answer>	Multiplication	Out

## Sheet: Ordering 2
Subreddit	Post	Disclosure (Ordering)	Disclosure Category	Query	ID	Conditionally Independent?	Source Used	Succeeded?	Reliable?	Annotator Confidence	Value	Ground Truth	Ground Truth Reliability	Ground Truth Source	Disclosure Type	ChatGPT Response	Operation	Parentheses
chapmanuniversity	TITLE: Tattoo artist Hey guys! I'm a tattoo artist living in the OC area. I specialize in gothic lettering and can do custom prints! If you're interested in getting a tattoo, I'd love to set up a consultation to discuss your ideas. Don't worry if you're a total newbie or have any questions, hit me up if you're interested!	living in the OC area	location	number of people living in the orange county area	1	[]	ChatGPT	Yes	Yes	High	3160000	3186989	Yes	https://en.wikipedia.org/wiki/Orange_County,_California	Feasible	Orange County, California, has an estimated population of approximately 3,160,000 people as of recent census data. <answer>3160000</answer>	Multiplication	Out
chapmanuniversity	TITLE: Tattoo artist Hey guys! I'm a tattoo artist living in the OC area. I specialize in gothic lettering and can do custom prints! If you're interested in getting a tattoo, I'd love to set up a consultation to discuss your ideas. Don't worry if you're a total newbie or have any questions, hit me up if you're interested!	tattoo artist	occupation	percentage of people in the US that are tattoo artists	2	[1]	ChatGPT	Yes	Yes	High	0.0001	0.00015	Yes	https://blog.marketresearch.com/tattoo-parlors-tattoo-removal-is-now-a-booming-4.5-billion-industry#:~:text=There%20are%20roughly%2052%2C000%20tattoo,set%20up%20shop%20at%20home.	Feasible	Tattoo artists make up a very small percentage of the U.S. population. Based on the number of tattoo artists (estimated at around 30,000–40,000) compared to the total U.S. population (approximately 331 million), the percentage is roughly 0.01%. <answer>0.01</answer>	Multiplication	Out
chapmanuniversity	TITLE: Tattoo artist Hey guys! I'm a tattoo artist living in the OC area. I specialize in gothic lettering and can do custom prints! If you're interested in getting a tattoo, I'd love to set up a consultation to discuss your ideas. Don't worry if you're a total newbie or have any questions, hit me up if you're interested!	specializing in gothic lettering	occupation	percentage of tattoo artists that are goths	3	[1]	ChatGPT	Yes	No	Low	0.075	0.18	No	https://unwantedlife.me/alternative-subcultures	Important	The percentage of tattoo artists who identify as goths is likely higher than in the general artistic community, as tattoo culture often intersects with alternative subcultures like goth. An estimated value might range around 5-10%, reflecting the influence of goth aesthetics in tattooing styles and communities. <answer>7.5</answer>	Multiplication	Out
