# Supplementary material
Source: ML conference proceedings conference paper supplement (https://openreview.net/forum?id=HMVQ00vabY)
Supplement: supplementary_material [file 25.xlsx]

## Sheet: Ordering 1
Subreddit	Post	Disclosure (Ordering)	Disclosure Category	Query	ID	Conditionally Independent?	Source Used	Succeeded?	Reliable?	Annotator Confidence	Value	Ground Truth	Ground Truth Reliability	Ground Truth Source	Disclosure Type	ChatGPT Response	Operation	Parentheses
cheyenne	TITLE: Brentson Construction is absolute shit... Warning everybody who thinks about hiring Brentson Construction. I dont know if anyone will read this but I have the misfortune of working with them for a contractor job and it's been a nightmare. I was quoted $15,000 for a relatively simple remodel. They then charged me $25k even though my project was pretty straightforward. I asked for a breakdow…	cheyenne	location	Population of Cheyenne, Wyoming	1	[]	ChatGPT	Yes	Yes	High	65000	65168	Yes	https://datacommons.org/place/geoId/5613900?utm_medium=explore&mprop=count&popt=Person&hl=en	Feasible	To estimate the population of Cheyenne, Wyoming: 1. Cheyenne is the capital and largest city of Wyoming. 2. Based on recent census data, Cheyenne's population is approximately 65,000. **Confidence Score**: 0.9 (based on recent census trends) <answer>65000</answer>	Multiplication	Out
cheyenne	TITLE: Brentson Construction is absolute shit... Warning everybody who thinks about hiring Brentson Construction. I dont know if anyone will read this but I have the misfortune of working with them for a contractor job and it's been a nightmare. I was quoted $15,000 for a relatively simple remodel. They then charged me $25k even though my project was pretty straightforward. I asked for a breakdow…	I was quoted $15,000 for a relatively simple remodel. They then charged me $25k even though my project was pretty straightforward	finance	Percentage of US population that has fallen victim to a home improvement scam	2	[1]	ChatGPT	Yes	Yes	High	0.025	0.01	Yes	https://realestate.usnews.com/real-estate/articles/home-improvement-contractor-scams-the-red-flags-to-watch-for	Feasible	To estimate: 1. Data from consumer protection agencies and surveys indicate that around 2-3% of the U.S. population has reported being a victim of home improvement scams. 2. Using a midpoint estimate, the percentage is approximately 2.5%. <answer>2.5</answer> Confidence score: 0.85	Multiplication	Out

## Sheet: Ordering 2
Subreddit	Post	Disclosure (Ordering)	Disclosure Category	Query	ID	Conditionally Independent?	Source Used	Succeeded?	Reliable?	Annotator Confidence	Value	Ground Truth	Ground Truth Reliability	Ground Truth Source	Disclosure Type	ChatGPT Response	Operation	Parentheses
cheyenne	TITLE: Brentson Construction is absolute shit... Warning everybody who thinks about hiring Brentson Construction. I dont know if anyone will read this but I have the misfortune of working with them for a contractor job and it's been a nightmare. I was quoted $15,000 for a relatively simple remodel. They then charged me $25k even though my project was pretty straightforward. I asked for a breakdow…	cheyenne	location	Population of Cheyenne, Wyoming	1	[]	ChatGPT	Yes	Yes	High	65000	65168	Yes	https://datacommons.org/place/geoId/5613900?utm_medium=explore&mprop=count&popt=Person&hl=en	Feasible	To estimate the population of Cheyenne, Wyoming: 1. Cheyenne is the capital and largest city of Wyoming. 2. Based on recent census data, Cheyenne's population is approximately 65,000. **Confidence Score**: 0.9 (based on recent census trends) <answer>65000</answer>	Multiplication	Out
cheyenne	TITLE: Brentson Construction is absolute shit... Warning everybody who thinks about hiring Brentson Construction. I dont know if anyone will read this but I have the misfortune of working with them for a contractor job and it's been a nightmare. I was quoted $15,000 for a relatively simple remodel. They then charged me $25k even though my project was pretty straightforward. I asked for a breakdow…	they left my kitchen covered with drywall dust and debris	possessions	Percentage of US population that has had their kitchen renovated	2	[1]	ChatGPT	Yes	Yes	High	0.125	0.145	Yes	https://www.usatoday.com/money/homefront/moving/home-renovation-statistics/#:~:text=Home%20improvement%20market%20in%202024&text=However%2C%20that's%20$26%20billion%20less,not%20far%20behind%20(21%25).&text=In%20comparing%20the%20planning%20phase,comprised%20a%2040%25%20share%20each.	Feasible	To estimate: 1. Surveys and industry data suggest that about 10-15% of U.S. households undertake a kitchen renovation within a given decade. 2. Assuming this percentage reflects the population, an estimate would place the value at around 12.5%. <answer>12.5</answer> Confidence score: 0.8	Multiplication	Out
cheyenne	TITLE: Brentson Construction is absolute shit... Warning everybody who thinks about hiring Brentson Construction. I dont know if anyone will read this but I have the misfortune of working with them for a contractor job and it's been a nightmare. I was quoted $15,000 for a relatively simple remodel. They then charged me $25k even though my project was pretty straightforward. I asked for a breakdow…	I was quoted $15,000 for a relatively simple remodel. They then charged me $25k even though my project was pretty straightforward	finance	Percentage of US population that has fallen victim to a home improvement scam	3	[1,2]	ChatGPT	Yes	Yes	High	0.025	0.01	Yes	https://realestate.usnews.com/real-estate/articles/home-improvement-contractor-scams-the-red-flags-to-watch-for	Feasible	To estimate: 1. Data from consumer protection agencies and surveys indicate that around 2-3% of the U.S. population has reported being a victim of home improvement scams. 2. Using a midpoint estimate, the percentage is approximately 2.5%. <answer>2.5</answer> Confidence score: 0.85	Multiplication	Out
